# Supplementary material
Source: PubMed Central journal article supplement (PMC6030726)

# SRM

*FGCZ*

*23 October 2017*

## Distribution of qValues

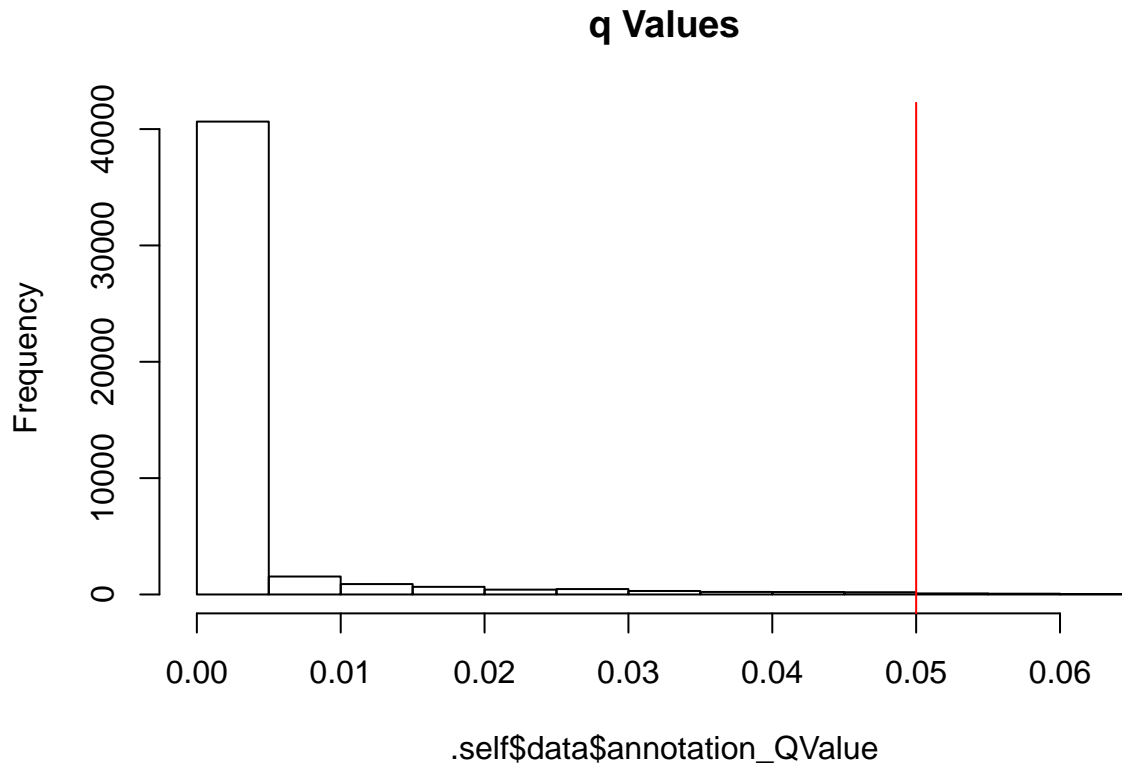

Histogram of qValues for all SRM assays. The red line indicates the qValue threshold - we control the False Discovery Rate (fdr) at this level.

## Remove all transitions with more than X missing values

Histogram showing the number of missing values for the heavy peptides in all samples. The red line indicates the maximum of NA's allowed.

Histogram showing the number of missing values for the light peptides in all samples. The red line indicates the maximum of NA's allowed.

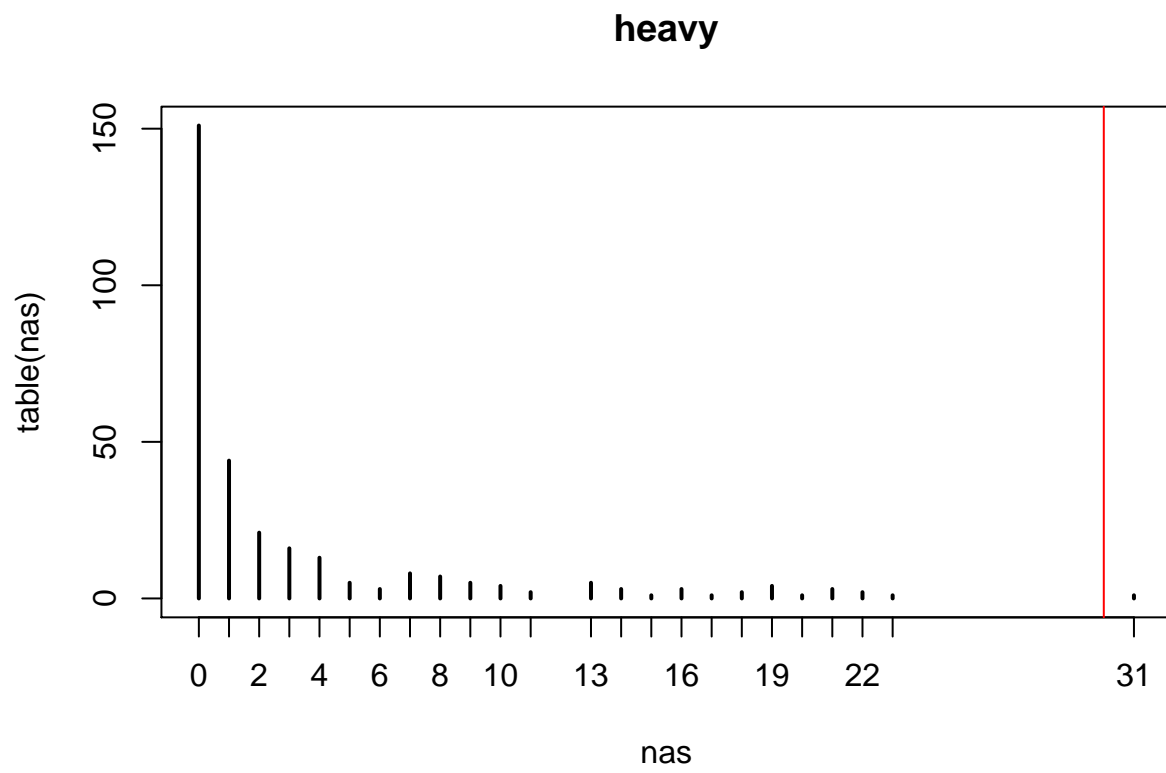

Figure 1: Distribution of NA's for heavy peptides

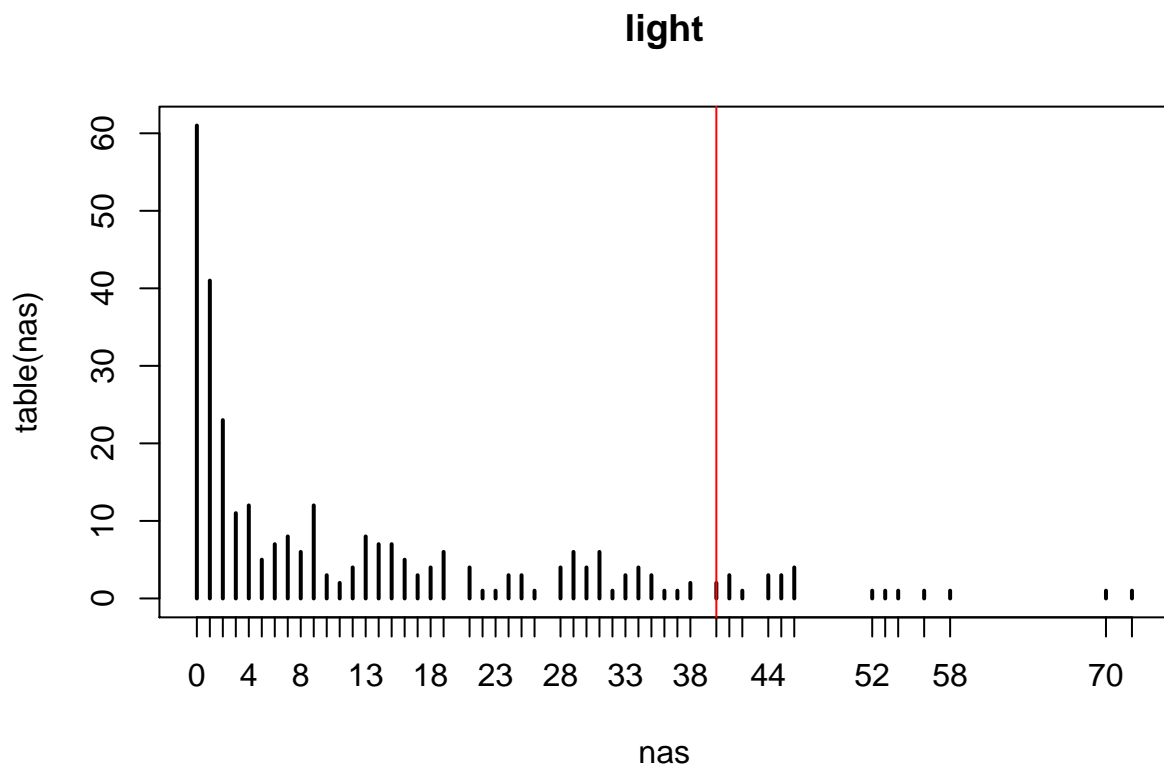

Figure 2: Distribution of NA's for light peptides.

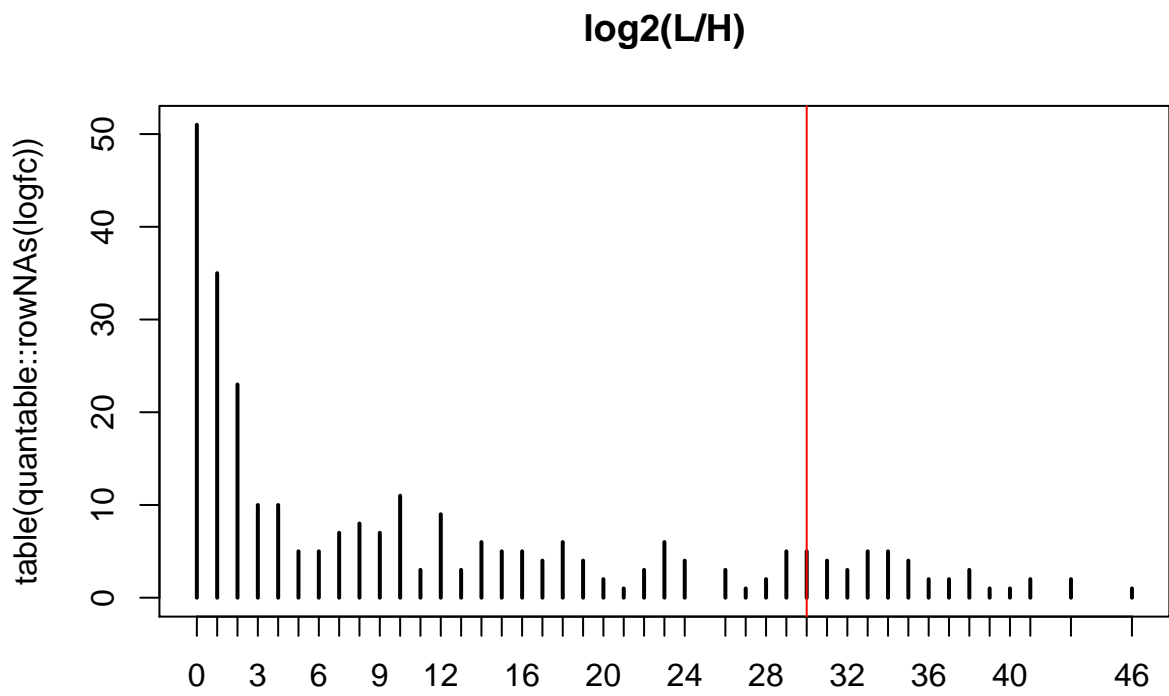

Figure 3: Missing values  $\log_2(L/H)$  per Transtion.



# Heatmap of log<sub>2</sub>(L/H)

Transitions dropped because of too many NA's in log<sub>2</sub> fold change.

Table 1: removed transitions (too many NA's)

| Peptide.Sequence    | Protein.Name            | Precursor.Charge | Product.Charge | Fragment.Ion |
|---------------------|-------------------------|------------------|----------------|--------------|
| AEGAGDAK            | sp P05204 HMG2 HUMAN    | 2                | 1              | y4           |
| AEGAGDAK            | sp P05204 HMG2 HUMAN    | 2                | 1              | y6           |
| AEGAGDAK            | sp P05204 HMG2 HUMAN    | 2                | 1              | y7           |
| APEQEQAAPGPAAGGEAPK | sp P80723-1 BASP1 HUMAN | 3                | 2              | y9           |
| CSFQDLDCPLDGGIQLR   | sp P01584 IL1B HUMAN    | 3                | 1              | y7           |
| CSFQDLDCPLDGGIQLR   | sp P01584 IL1B HUMAN    | 3                | 1              | y9           |
| CSFQDLDCPLDGGIQLR   | sp P01584 IL1B HUMAN    | 3                | 2              | y9           |
| DDKPTLQLESVDPK      | sp P01584 IL1B HUMAN    | 3                | 1              | y5           |
| DDKPTLQLESVDPK      | sp P01584 IL1B HUMAN    | 3                | 1              | y6           |
| DDKPTLQLESVDPK      | sp P01584 IL1B HUMAN    | 3                | 1              | y7           |
| DPAFTALLTTQTQVQR    | sp P54108 CRIS3 HUMAN   | 2                | 1              | y7           |
| FALITWIGENVSGLQR    | sp Q14019 COTL1 HUMAN   | 3                | 1              | y5           |
| FALITWIGENVSGLQR    | sp Q14019 COTL1 HUMAN   | 3                | 1              | y7           |
| FYQLPSNQYQSTR       | sp P22894 MMP8 HUMAN    | 2                | 1              | b4           |
| FYQLPSNQYQSTR       | sp P22894 MMP8 HUMAN    | 2                | 1              | y5           |
| FYQLPSNQYQSTR       | sp P22894 MMP8 HUMAN    | 2                | 1              | y6           |
| FYQLPSNQYQSTR       | sp P22894 MMP8 HUMAN    | 2                | 2              | y9           |
| GFSGTPGSNENSTQNVYK  | sp Q9NP99-1 TREM1 HUMAN | 2                | 1              | b5           |
| GFSGTPGSNENSTQNVYK  | sp Q9NP99-1 TREM1 HUMAN | 2                | 1              | y2           |
| GFSGTPGSNENSTQNVYK  | sp Q9NP99-1 TREM1 HUMAN | 2                | 1              | y4           |
| GFSGTPGSNENSTQNVYK  | sp Q9NP99-1 TREM1 HUMAN | 2                | 2              | y13          |
| GNFHAVYR            | sp P05109 S10A8 HUMAN   | 2                | 1              | y2           |
| GNFHAVYR            | sp P05109 S10A8 HUMAN   | 2                | 1              | y5           |
| GNFHAVYR            | sp P05109 S10A8 HUMAN   | 2                | 2              | y5           |
| GNPTVEVDLFTSK       | sp P06733-1 ENOA HUMAN  | 2                | 1              | y3           |
| GNPTVEVDLFTSK       | sp P06733-1 ENOA HUMAN  | 2                | 1              | y6           |
| GNPTVEVDLFTSK       | sp P06733-1 ENOA HUMAN  | 2                | 1              | y8           |
| IILEDYHDHGLLR       | sp Q9NP99-1 TREM1 HUMAN | 3                | 2              | y11          |
| IQNLLPDDSVSTTR      | sp P48595 SPB10 HUMAN   | 2                | 1              | y7           |
| LGNGVQCLAMGWLLGR    | sp P08246 ELNE HUMAN    | 2                | 1              | y8           |
| NLYLSCVLK           | sp P01584 IL1B HUMAN    | 2                | 1              | y6           |
| NLYLSCVLK           | sp P01584 IL1B HUMAN    | 2                | 1              | y7           |
| NSHPVQVGR           | sp Q9NP99-1 TREM1 HUMAN | 2                | 1              | b3           |
| NSHPVQVGR           | sp Q9NP99-1 TREM1 HUMAN | 2                | 1              | y6           |
| NSHPVQVGR           | sp Q9NP99-1 TREM1 HUMAN | 2                | 2              | y6           |
| NSHPVQVGR           | sp Q9NP99-1 TREM1 HUMAN | 2                | 2              | y7           |
| NYPENTYYSNFISHLANIK | sp P23280 CAH6 HUMAN    | 2                | 1              | y7           |
| QGNMATAALQAALK      | sp O15511-1 ARPC5 HUMAN | 2                | 2              | y10          |
| TYFPHFDLSHGSAQVK    | sp P69905 HBA HUMAN     | 2                | 2              | y12          |
| TYLFLQEYLDIAIK      | sp P29508-1 SPB3 HUMAN  | 2                | 1              | y7           |
| TYLFLQEYLDIAIK      | sp P29508-1 SPB3 HUMAN  | 2                | 1              | y8           |
| VDVDEYDENK          | sp O15511-1 ARPC5 HUMAN | 2                | 1              | y5           |
| VDVDEYDENK          | sp O15511-1 ARPC5 HUMAN | 2                | 1              | y6           |
| VDVDEYDENK          | sp O15511-1 ARPC5 HUMAN | 2                | 1              | y7           |
| VDVVLGPIQLQTPPR     | sp Q9UGM3-1 DMBT1 HUMAN | 2                | 1              | b3           |
| VDVVLGPIQLQTPPR     | sp Q9UGM3-1 DMBT1 HUMAN | 2                | 1              | b4           |

| Peptide.Sequence    | Protein.Name            | Precursor.Charge | Product.Charge | Fragment.Ion |
|---------------------|-------------------------|------------------|----------------|--------------|
| VDVVLGPIQLQTPPR     | sp Q9UGM3-1 DMBT1 HUMAN | 2                | 1              | b5           |
| VDVVLGPIQLQTPPR     | sp Q9UGM3-1 DMBT1 HUMAN | 2                | 2              | y11          |
| VFDEFKPLVEEPQNLIK   | sp P02768-1 ALBU HUMAN  | 3                | 2              | y5           |
| VPAQSESVR           | sp P50552 VASP HUMAN    | 2                | 1              | y6           |
| VPAQSESVR           | sp P50552 VASP HUMAN    | 2                | 1              | y7           |
| VPAQSESVR           | sp P50552 VASP HUMAN    | 2                | 2              | y8           |
| VQIYHNPTANSFR       | sp P50552 VASP HUMAN    | 2                | 1              | b6           |
| VQIYHNPTANSFR       | sp P50552 VASP HUMAN    | 2                | 1              | y7           |
| VQIYHNPTANSFR       | sp P50552 VASP HUMAN    | 2                | 1              | y8           |
| VQIYHNPTANSFR       | sp P50552 VASP HUMAN    | 2                | 2              | y11          |
| VTIAQGGVLPNIQAVLLPK | sp P0C0S8 H2A1 HUMAN    | 2                | 2              | y10          |

## Peptide Quantification

The following plots show  $\text{Log}_2(\text{H}/\text{L})$  of peptides belonging to the same proteins (y axis) given samples (x axis). These fold changes will be used to compute the fold H/L fold change of the protein in a sample.

**Remove all peptides with only one transition.**

Table 2: peptides removed since only a single valid transition

| Peptide.Sequence | Protein.Name            | Precursor.Charge | Product.Charge | Fragment.Ion |
|------------------|-------------------------|------------------|----------------|--------------|
| FALITWIGENVSGLQR | sp Q14019 COTL1 HUMAN   | 3                | 1              | y4           |
| FYQLPSNQYQSTR    | sp P22894 MMP8 HUMAN    | 2                | 1              | b3           |
| TYLFLQEYLDAIK    | sp P29508-1 SPB3 HUMAN  | 2                | 1              | b3           |
| VDVVLGPIQLQTPPR  | sp Q9UGM3-1 DMBT1 HUMAN | 2                | 1              | y3           |

Removing decorrelated



## List of peptides removed

Peptides might have been removed since there were no quantified transtions, only a single transition was quantified or the transition were uncorrelated.

Table 3: All removed peptides.

| Protein.Name            | Peptide.Sequence    | Precursor.Charge |
|-------------------------|---------------------|------------------|
| sp P05204 HMG2 HUMAN    | AEGAGDAK            | 2                |
| sp P80723-1 BASP1 HUMAN | APEQEQAAPGPAAGGEAPK | 3                |
| sp P01584 IL1B HUMAN    | CSFQDL DLCPLDGGIQLR | 3                |
| sp P01584 IL1B HUMAN    | DDKPTLQLESVDPK      | 3                |
| sp Q14019 COTL1 HUMAN   | FALITWIGENVSGLQR    | 3                |
| sp P22894 MMP8 HUMAN    | FYQLPSNQYQSTR       | 2                |
| sp Q9NP99-1 TREM1 HUMAN | GFSGTPGSNENSTQNVYK  | 2                |
| sp P05109 S10A8 HUMAN   | GNFHAVYR            | 2                |
| sp P06733-1 ENO1 HUMAN  | GNPTVEVDLFTSK       | 2                |
| sp P01584 IL1B HUMAN    | NLYLSCVLK           | 2                |
| sp Q9NP99-1 TREM1 HUMAN | NSHPVQVGR           | 2                |
| sp O15511-1 ARPC5 HUMAN | QGNMTAALQAALK       | 2                |
| sp P29508-1 SPB3 HUMAN  | TYLFLQEYLDAIK       | 2                |
| sp O15511-1 ARPC5 HUMAN | VDVDEYDENK          | 2                |
| sp Q9UGM3-1 DMBT1 HUMAN | VDVVLGPIQLQTPPR     | 2                |
| sp P50552 VASP HUMAN    | VPAQSESVR           | 2                |
| sp P50552 VASP HUMAN    | VQIYHNPTANSFR       | 2                |

## List of peptides used for quantification

Table 4: Peptides Still available and Nr of transitions per peptide.  
Columns charge state.

|                    | 2 | 3 |
|--------------------|---|---|
| AAQVTIQSSGTFSSK    | 3 | 0 |
| AAYNLVR            | 3 | 0 |
| AGFAGDDAPR         | 3 | 0 |
| AGLQFPVGR          | 3 | 0 |
| ALAAGGVGSIVR       | 3 | 0 |
| ALDFAVGGEYNK       | 3 | 0 |
| ALNSIIDVYHK        | 3 | 0 |
| ALQVVR             | 3 | 0 |
| ALTGHLEEVVLALLK    | 0 | 3 |
| APEPHVEEDDDDELDSK  | 0 | 4 |
| APNVVVTR           | 3 | 0 |
| ASNDMYHSR          | 3 | 0 |
| ASSIIDELFQDR       | 3 | 0 |
| AVFPSIVGRPR        | 3 | 0 |
| AVGLQLYYK          | 3 | 0 |
| CVWDIEVQNNYR       | 4 | 0 |
| DGAGDVAFIR         | 3 | 0 |
| DNENVVNEYSSELEK    | 5 | 0 |
| DPAFTALLTTQTQVQR   | 3 | 0 |
| EDGGWWYNR          | 3 | 0 |
| EILSVDCSTNNPSQAK   | 3 | 0 |
| ELLALIQLER         | 3 | 0 |
| ESEPQAAAEPAEAK     | 3 | 0 |
| ETPAATEAPSSTPK     | 3 | 0 |
| FCEAEFSVK          | 3 | 0 |
| FFADLLDYIK         | 3 | 0 |
| FGNADGAACHFPFIFEGR | 0 | 3 |
| FLASVSTVLTSK       | 3 | 0 |
| FQNALLVR           | 3 | 0 |
| GEELSCEER          | 3 | 0 |
| GLGTDEDTLIEILASR   | 3 | 0 |
| GVDEATHIDILTK      | 3 | 0 |
| HLQLAIR            | 3 | 0 |
| HVIEIHIVHYNSK      | 0 | 3 |
| IGAEVYHNLK         | 3 | 0 |
| ILEDYHDHGLLR       | 0 | 2 |
| INLGFSNLK          | 3 | 0 |
| IQNLLPDDSVDSTTR    | 4 | 0 |
| LENSLLDHR          | 3 | 0 |
| LFAFVR             | 3 | 0 |
| LFSDPITVTVPVEVSR   | 4 | 0 |
| LGNGVQCLAMGWLLGR   | 2 | 0 |
| LLETECPQYIR        | 3 | 0 |
| LSAKPAPPKPEPKPK    | 0 | 3 |
| LTFINDLCGPR        | 3 | 0 |
| NLFLSNVFK          | 3 | 0 |
| NLLFNDNTECLAR      | 3 | 0 |

|                     | 2 | 3 |
|---------------------|---|---|
| NQGNTWLTAFVLK       | 3 | 0 |
| NYPENTYYSNFISHLANIK | 2 | 0 |
| QDGSVDFGR           | 4 | 0 |
| QGHNSVFLIK          | 0 | 3 |
| QLAEEYLYR           | 3 | 0 |
| QNCELFEQLGEYK       | 3 | 0 |
| QSTLVLFPGDLR        | 3 | 0 |
| QYTSFHFASLEDVQAK    | 0 | 3 |
| SGAQATWTELPWPHEK    | 0 | 3 |
| SISGAFFGIESK        | 3 | 0 |
| SNLCALCIGDEQGENK    | 3 | 0 |
| SNVCTLVR            | 3 | 0 |
| SYELPDGQVITIGNER    | 3 | 0 |
| TLLGDGPVVTDPK       | 3 | 0 |
| TYFPHFDLSHGSAQVK    | 2 | 0 |
| VFDEFKPLVEEPQNLIK   | 0 | 2 |
| VGAHAGEYGAEALER     | 0 | 3 |
| VIGGDDLSTLTGK       | 3 | 0 |
| VLHFDQVTENTTGK      | 0 | 3 |
| VLSSIEQK            | 3 | 0 |
| VSVQLEASPAFLAVPVEK  | 4 | 0 |
| VTIAQGGVLPNIQAVLLPK | 5 | 0 |
| VVLGAHNLSR          | 0 | 3 |
| VWVYPPEK            | 3 | 0 |
| WANQCNYR            | 3 | 0 |
| YISPDQLADLYK        | 4 | 0 |
| YLAEVATGDDK         | 3 | 0 |
| YNQATPNFHQWR        | 0 | 3 |
| YYAFDLIAQR          | 3 | 0 |
| YYYVCQYCPAGNWANR    | 5 | 0 |

# Peptide Intensities

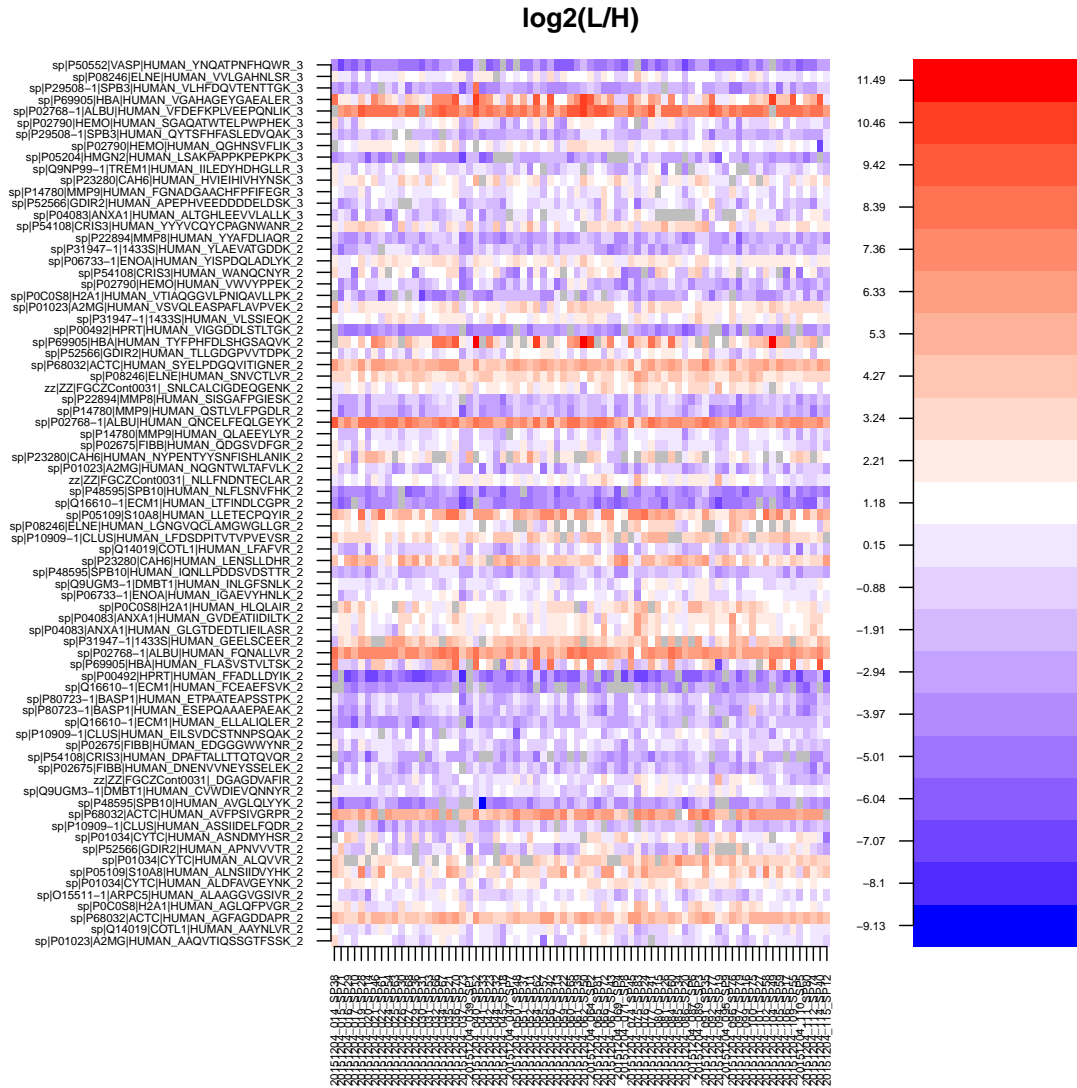

# Protein Intensities

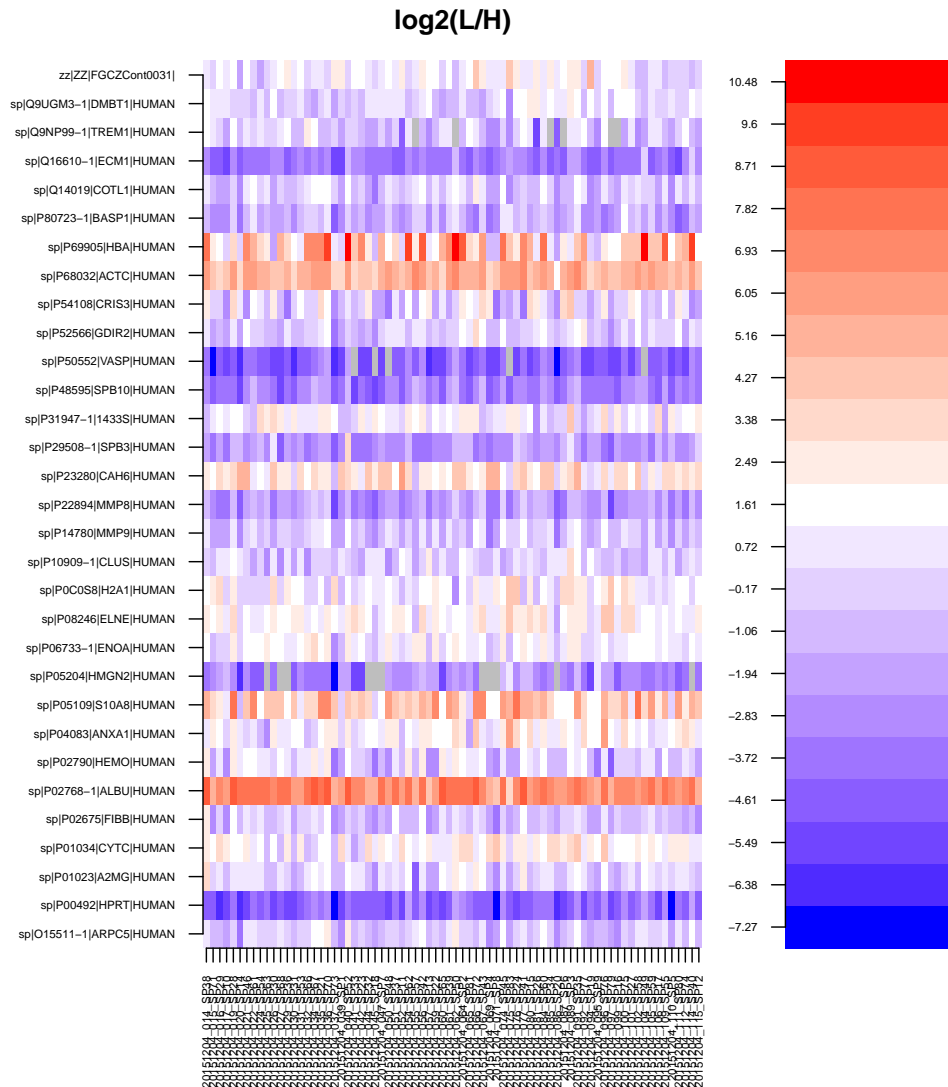

## List of quantified proteins

Table 5: Quantified proteins with number of peptides used for quantification

| Protein                 | NrPeptides |
|-------------------------|------------|
| sp O15511-1 ARPC5 HUMAN | 1          |
| sp P00492 HPRT HUMAN    | 2          |
| sp P01023 A2MG HUMAN    | 3          |
| sp P01034 CYTC HUMAN    | 3          |
| sp P02675 FIBB HUMAN    | 3          |
| sp P02768-1 ALBU HUMAN  | 3          |
| sp P02790 HEMO HUMAN    | 3          |
| sp P04083 ANXA1 HUMAN   | 3          |
| sp P05109 S10A8 HUMAN   | 2          |
| sp P05204 HMGN2 HUMAN   | 1          |
| sp P06733-1 ENOA HUMAN  | 2          |
| sp P08246 ELNE HUMAN    | 3          |
| sp P0C0S8 H2A1 HUMAN    | 3          |
| sp P10909-1 CLUS HUMAN  | 3          |
| sp P14780 MMP9 HUMAN    | 3          |
| sp P22894 MMP8 HUMAN    | 2          |
| sp P23280 CAH6 HUMAN    | 3          |
| sp P29508-1 SPB3 HUMAN  | 2          |
| sp P31947-1 1433S HUMAN | 3          |
| sp P48595 SPB10 HUMAN   | 3          |
| sp P50552 VASP HUMAN    | 1          |
| sp P52566 GDIR2 HUMAN   | 3          |
| sp P54108 CRIS3 HUMAN   | 3          |
| sp P68032 ACTC HUMAN    | 3          |
| sp P69905 HBA HUMAN     | 3          |
| sp P80723-1 BASP1 HUMAN | 2          |
| sp Q14019 COTL1 HUMAN   | 2          |
| sp Q16610-1 ECM1 HUMAN  | 3          |
| sp Q9NP99-1 TREM1 HUMAN | 1          |
| sp Q9UGM3-1 DMBT1 HUMAN | 2          |
| zz ZZ FGCZCont0031      | 3          |

## List of proteins not quantified

---

proteins

---

sp|P01584|IL1B|HUMAN

---

# Peptide profiles per Protein

sp|O15511-1|ARPC5|HUMAN

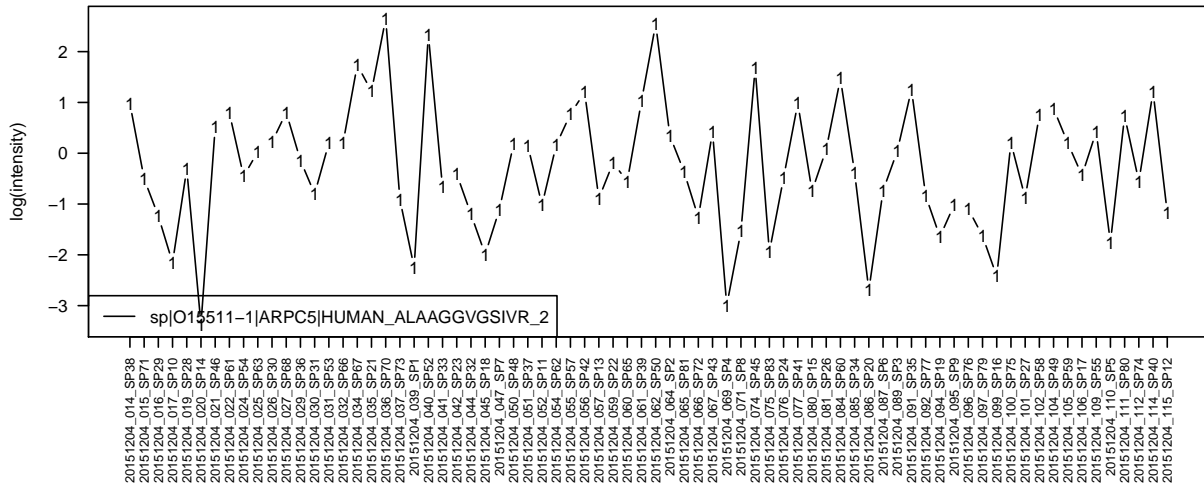

sp|P00492|HPRT|HUMAN

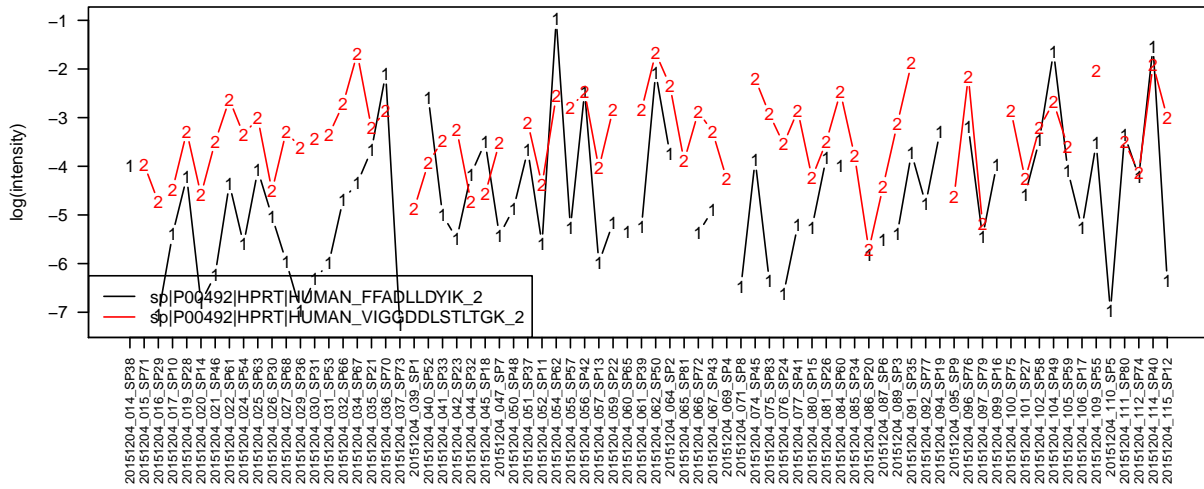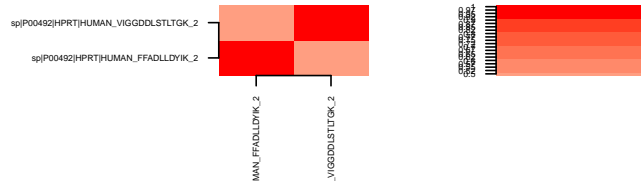



sp|P01023|A2MG|HUMAN

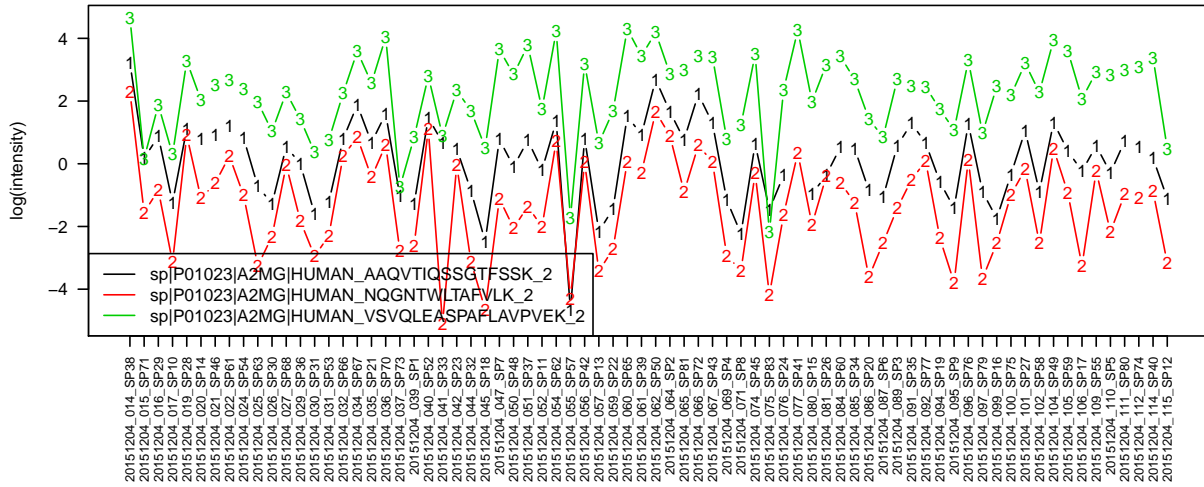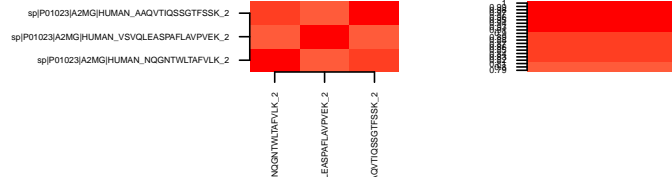

sp|P01034|CYTC|HUMAN

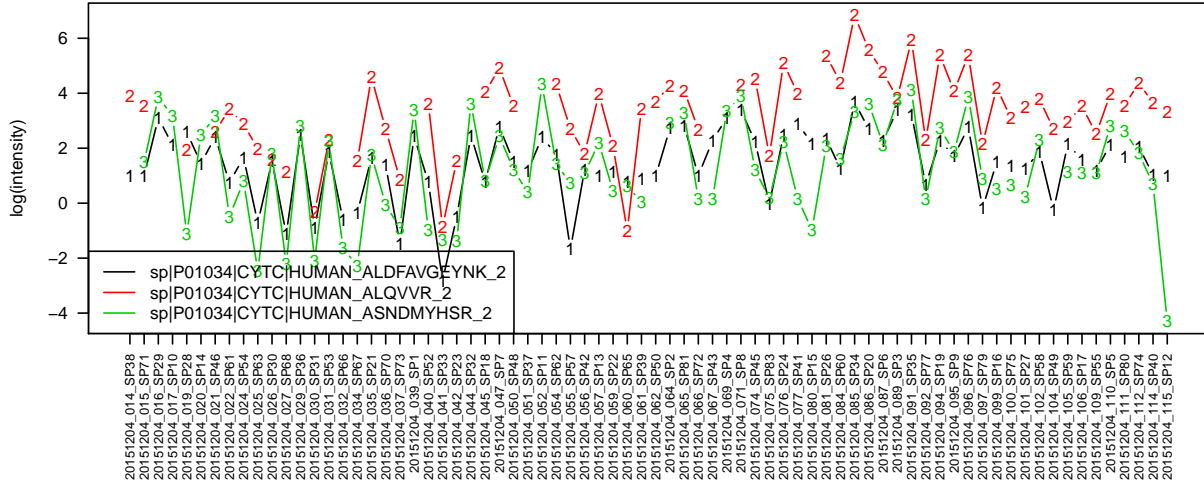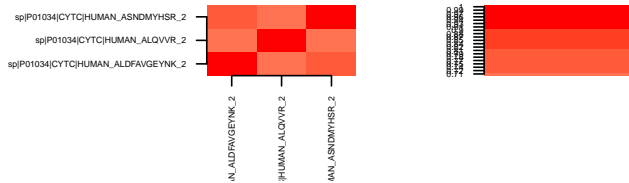

sp|P02675|FIBB|HUMAN

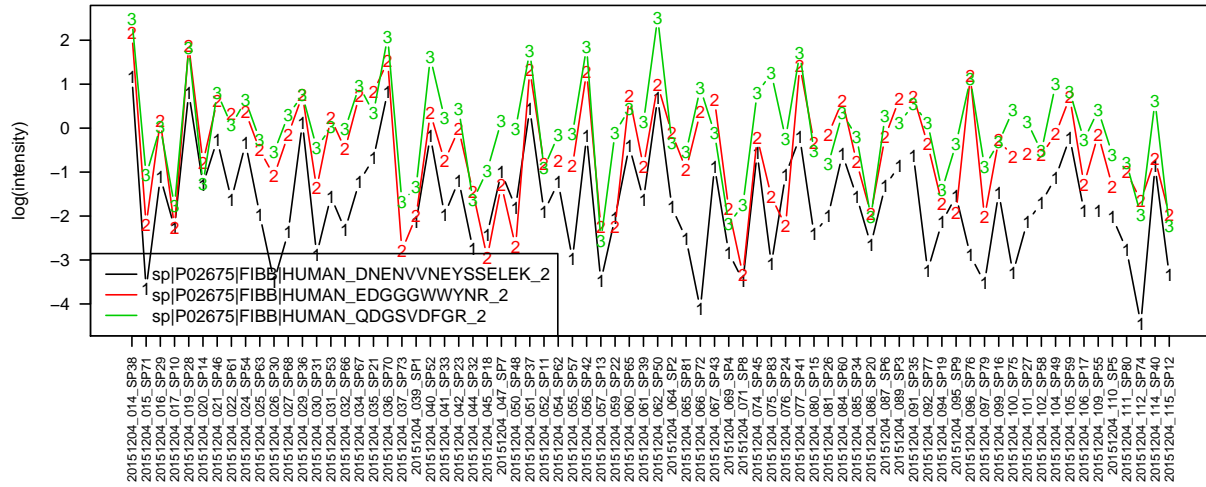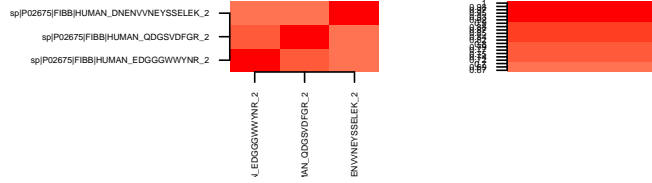

sp|P02768-1|ALBU|HUMAN

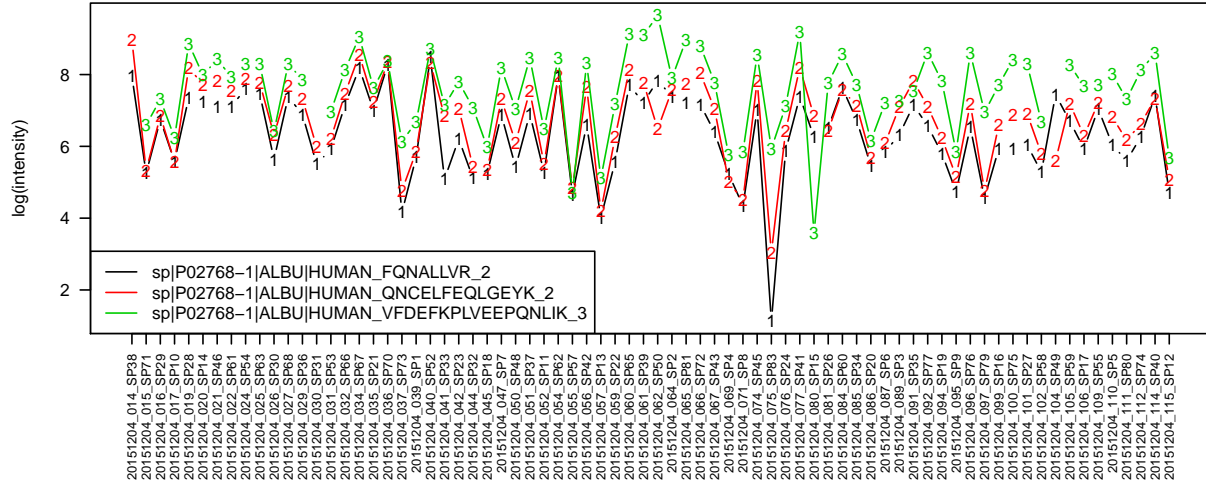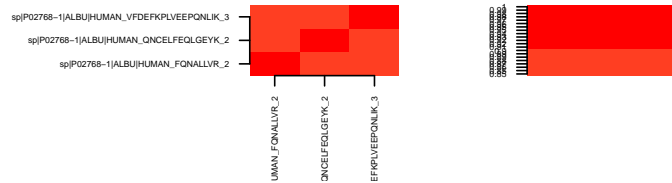

sp|P02790|HEMO|HUMAN

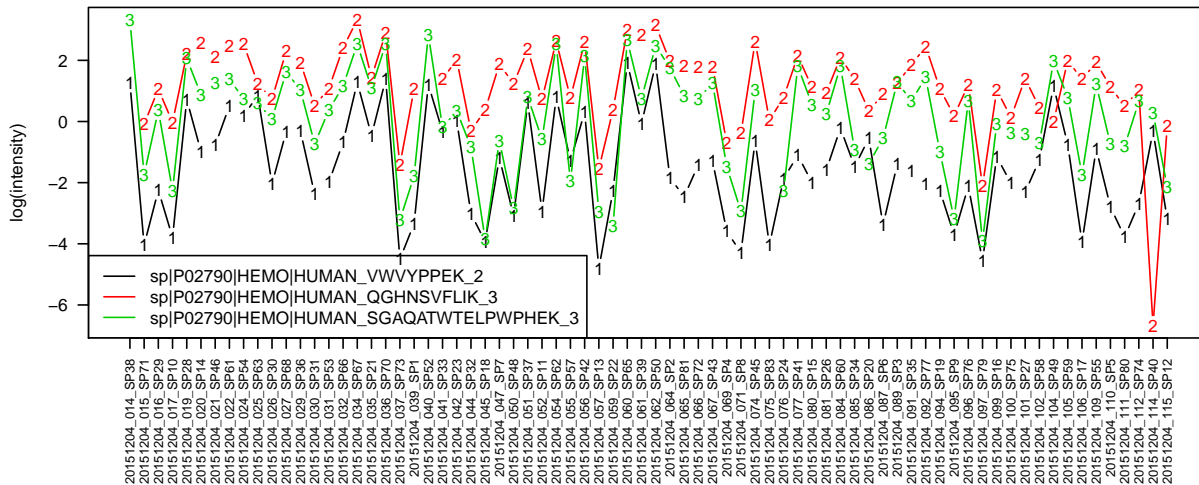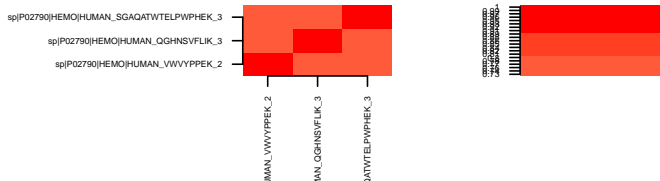

sp|P04083|ANXA1|HUMAN

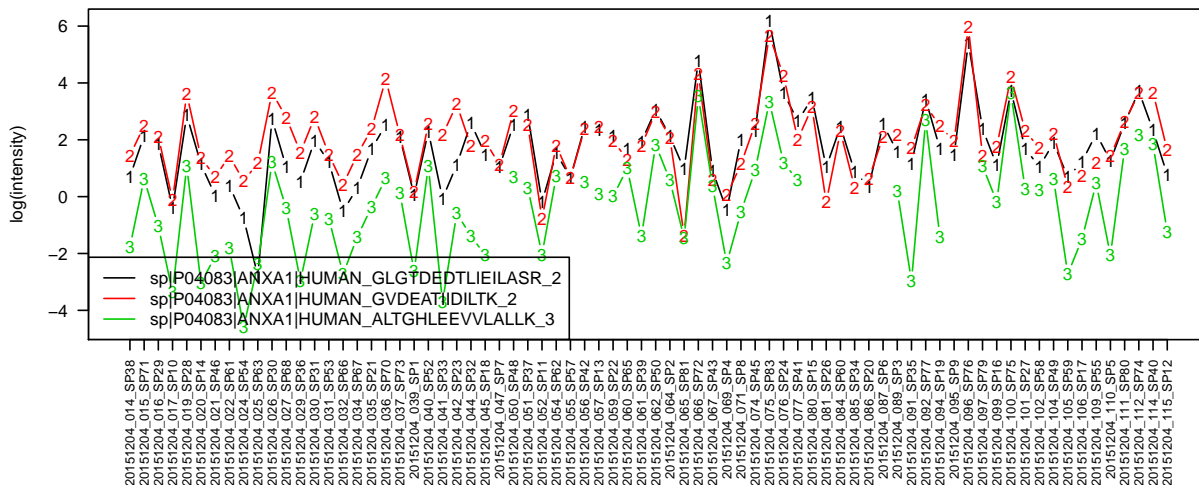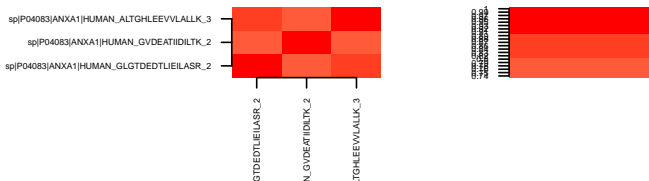

sp|P05109|S10A8|HUMAN

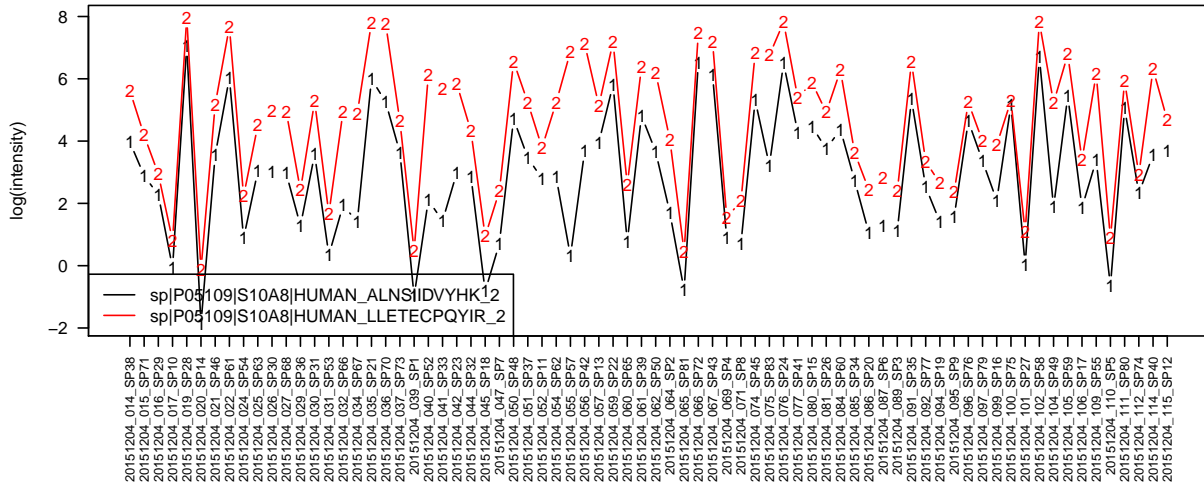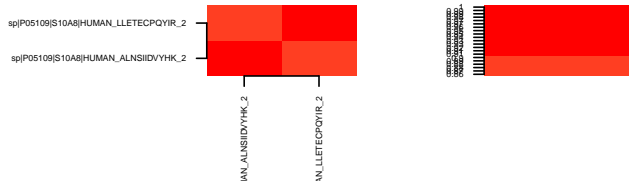

sp|P05204|HMG2|HUMAN

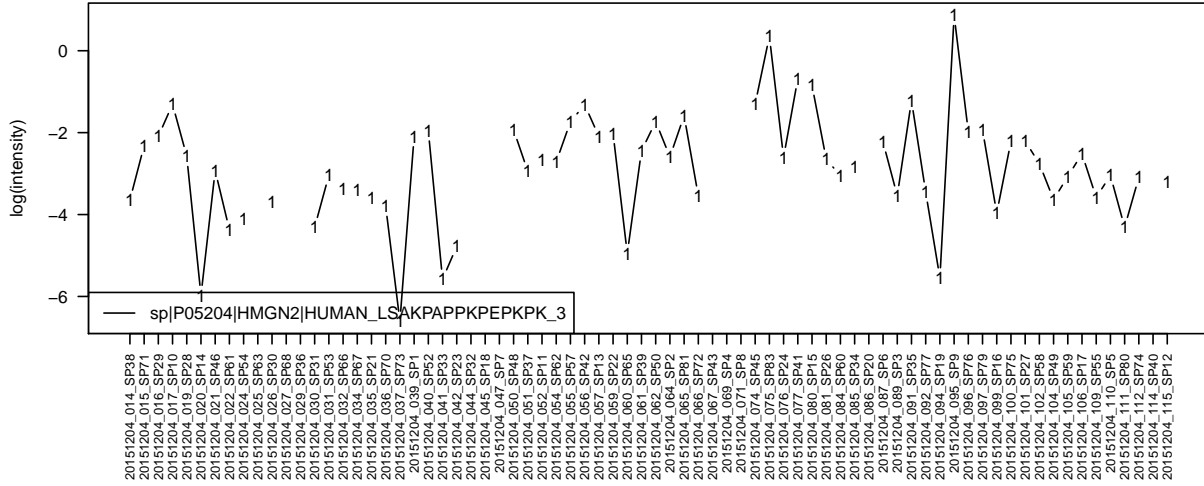

sp|P06733-1|ENOA|HUMAN

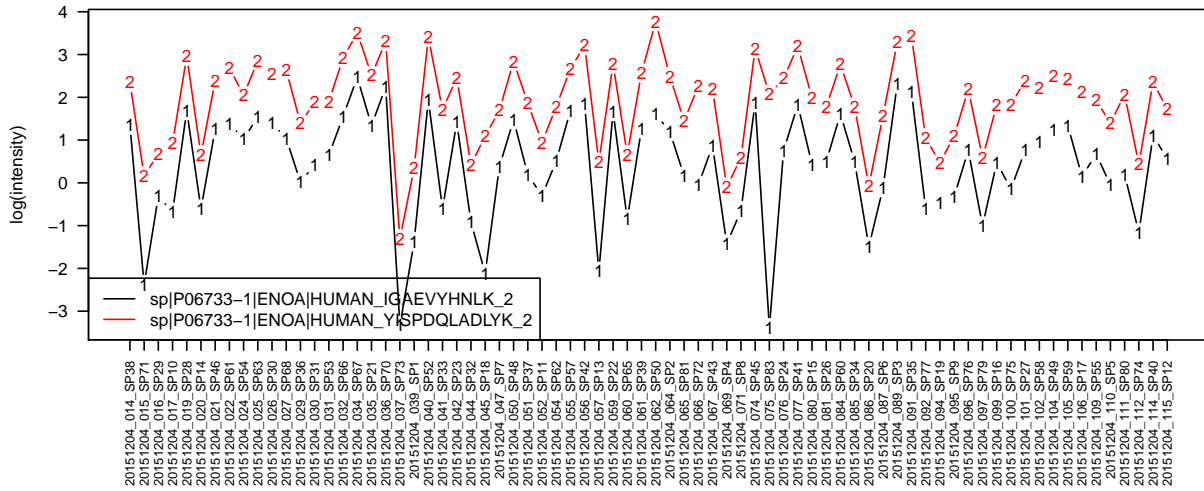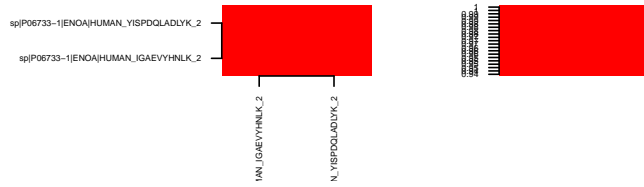

sp|P08246|ELNE|HUMAN

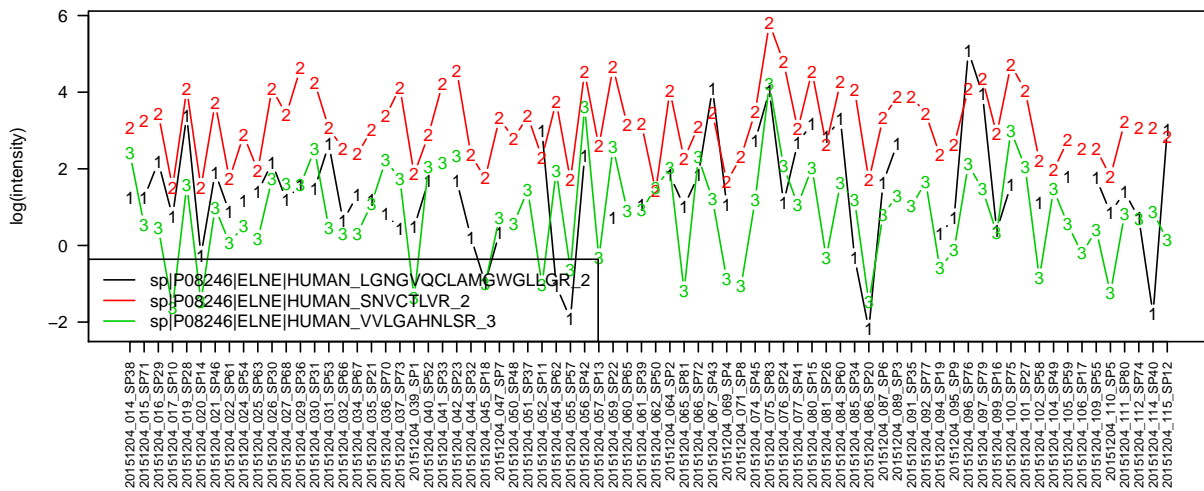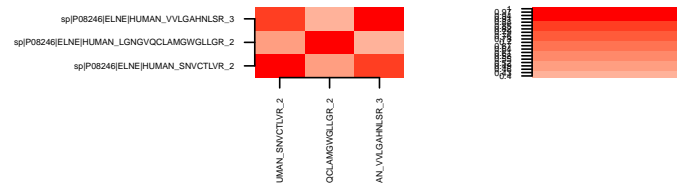

sp|P0C0S8|H2A1|HUMAN

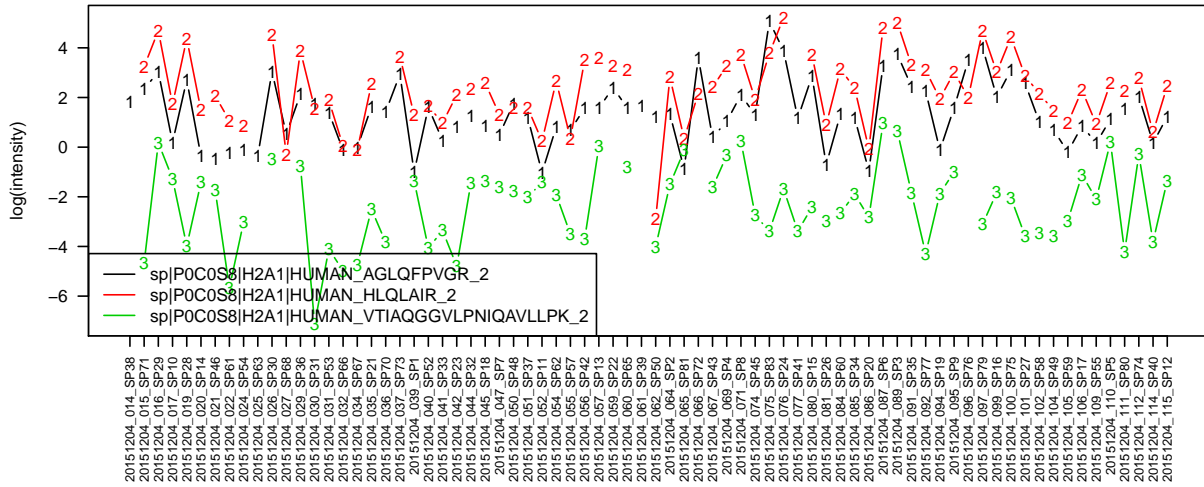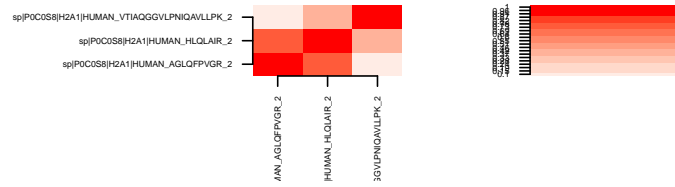

sp|P10909-1|CLUS|HUMAN

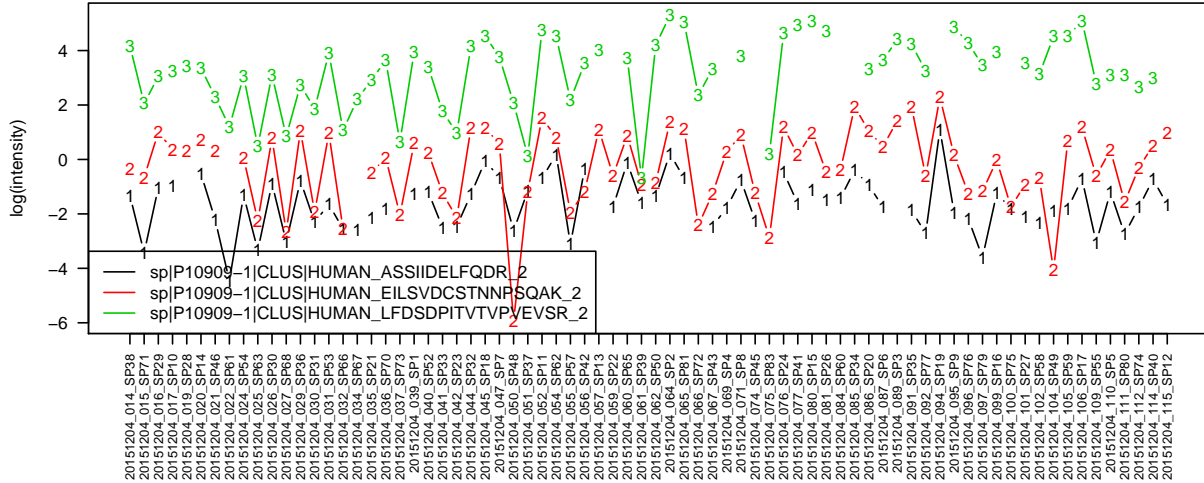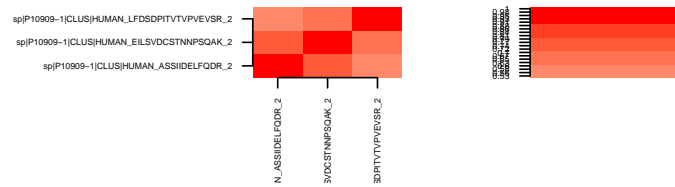

sp|P14780|MMP9|HUMAN

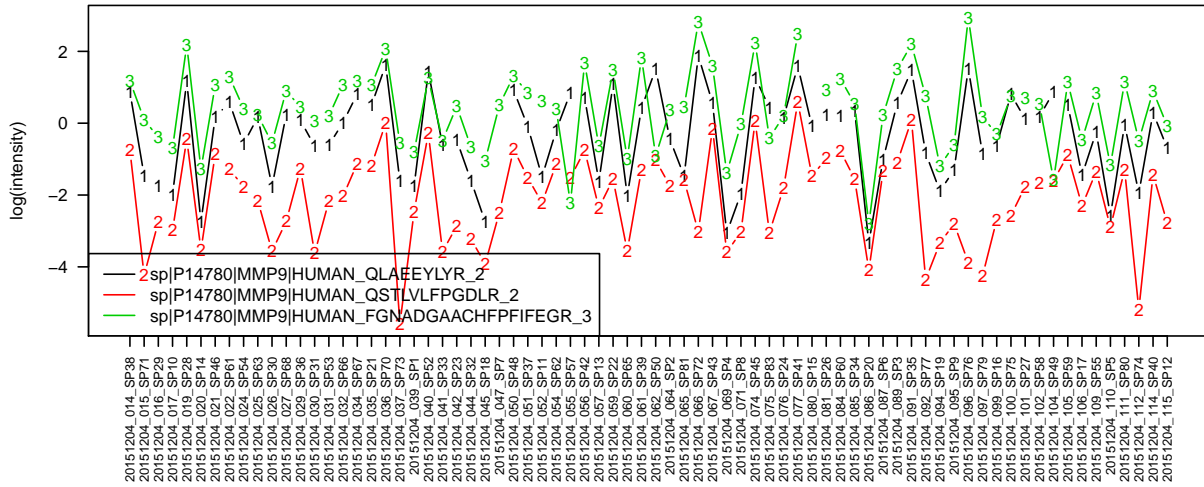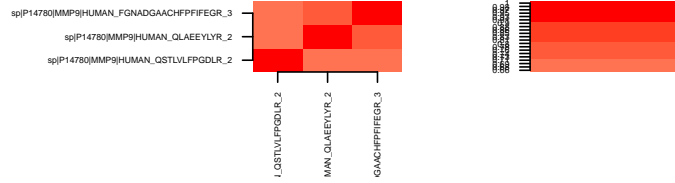

sp|P22894|MMP8|HUMAN

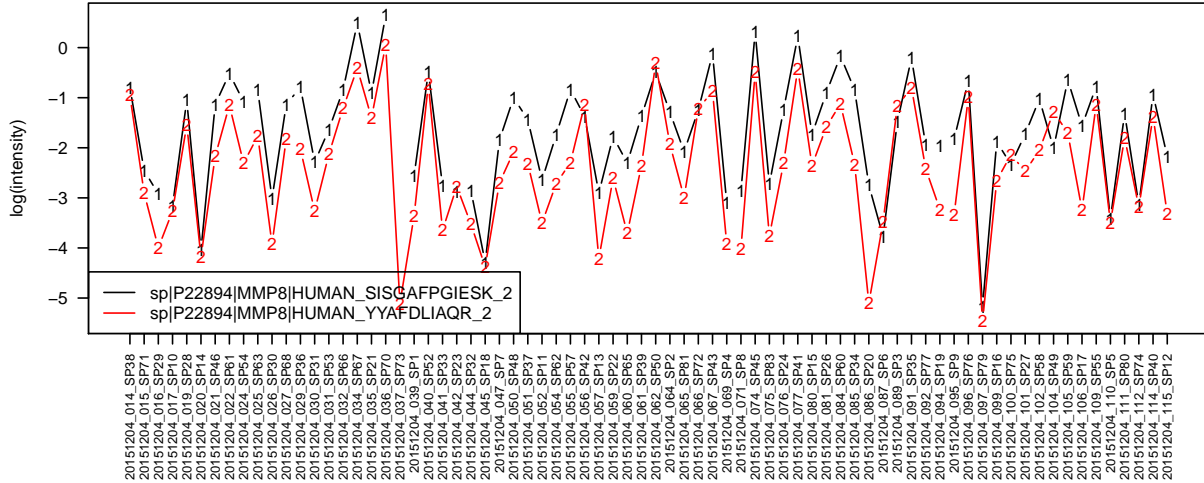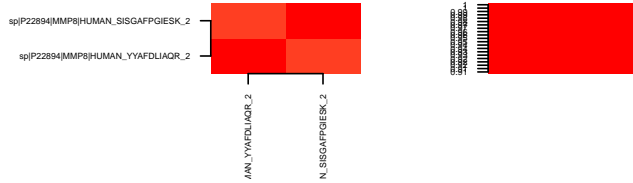

sp|P23280|CAH6|HUMAN

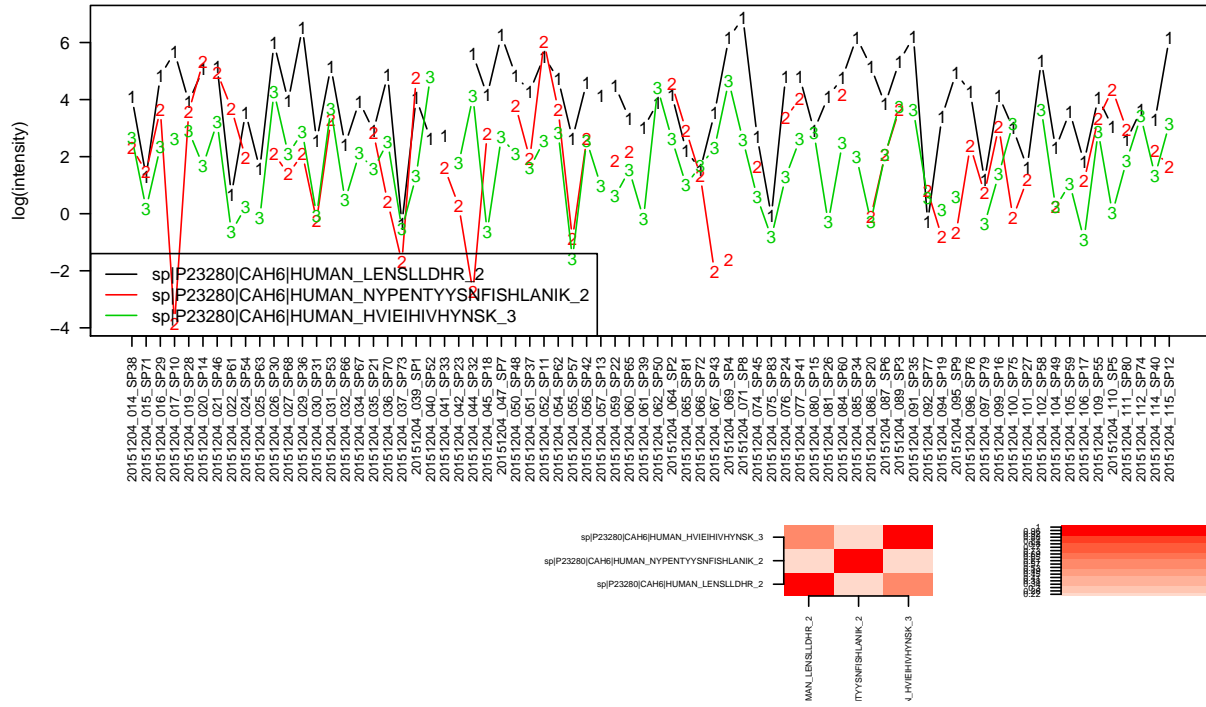

sp|P29508-1|SPB3|HUMAN

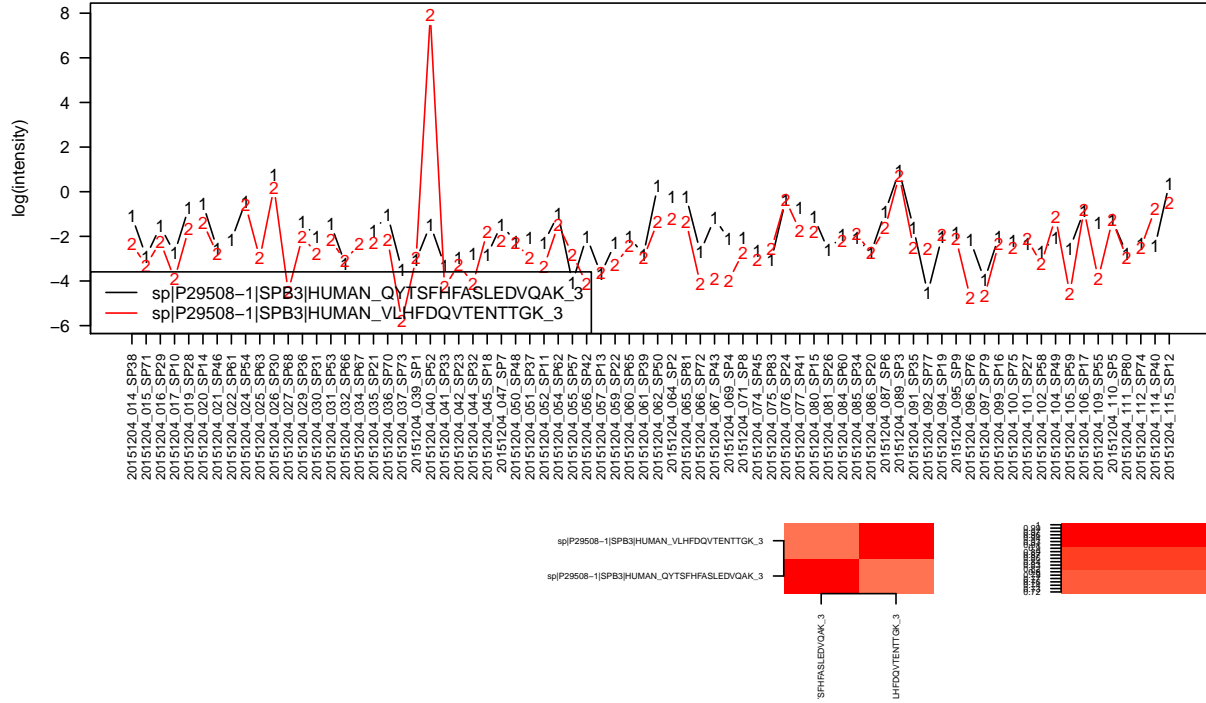



sp|P31947-1|1433S|HUMAN

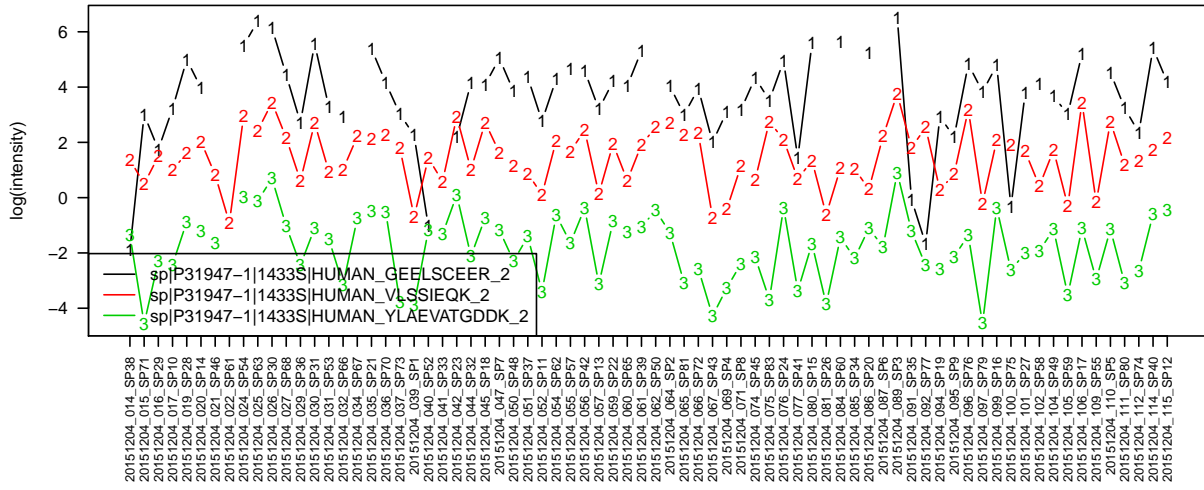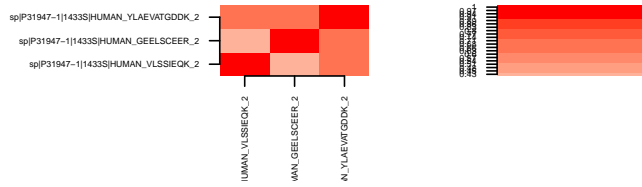

sp|P48595|SPB10|HUMAN

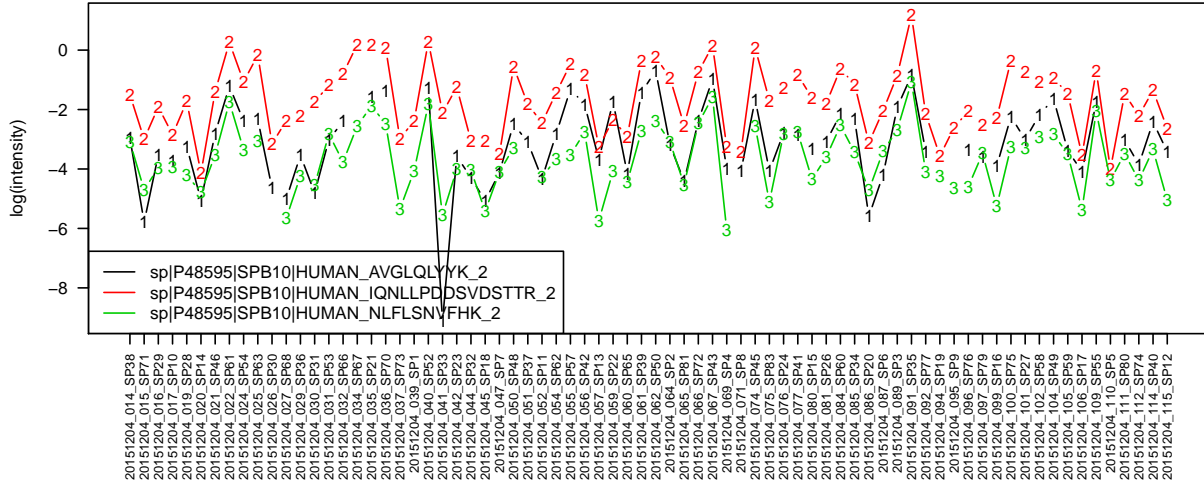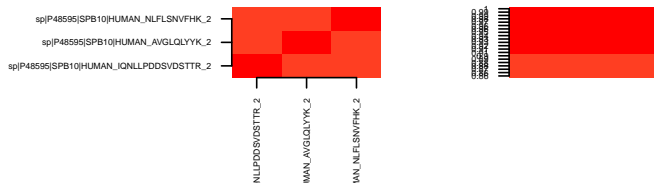

sp|P50552|VASP|HUMAN

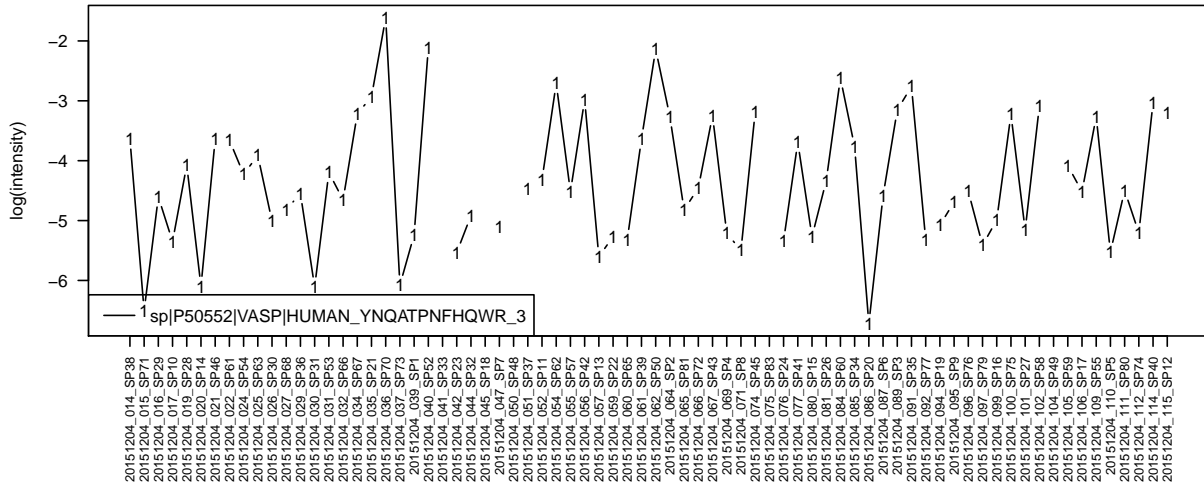

sp|P52566|GDIR2|HUMAN

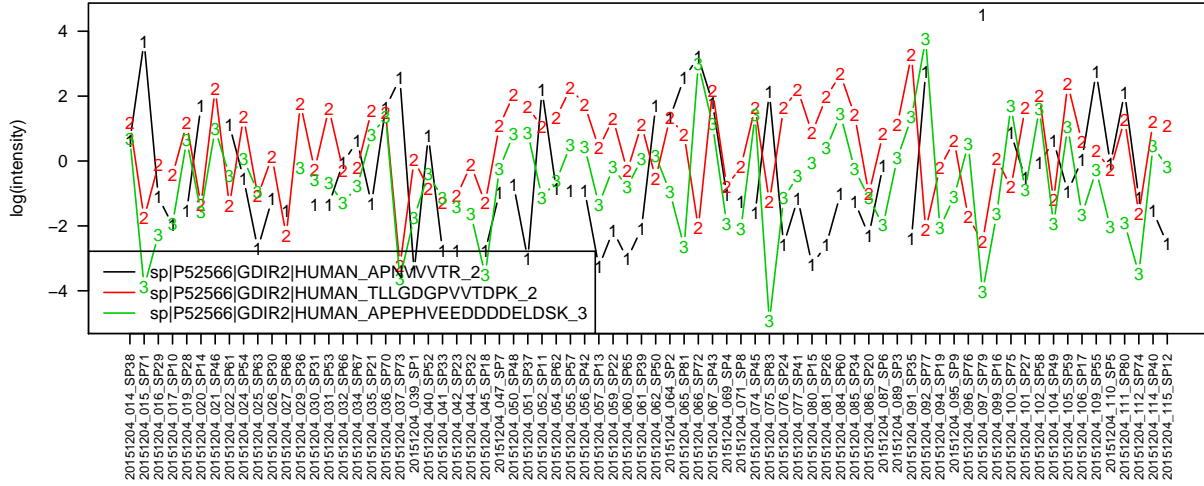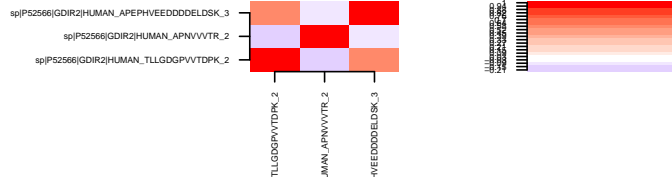

sp|P54108|CRIS3|HUMAN

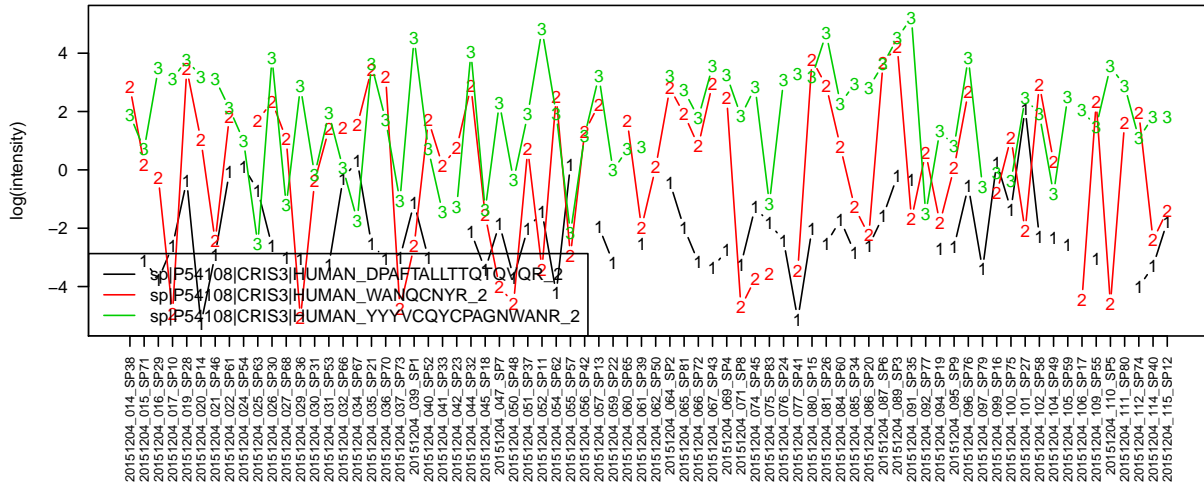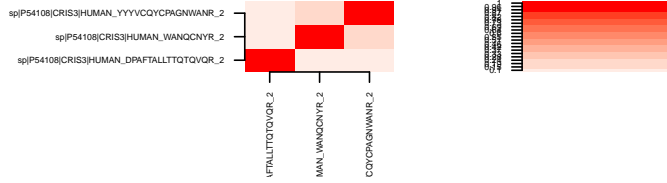

sp|P68032|ACTC|HUMAN

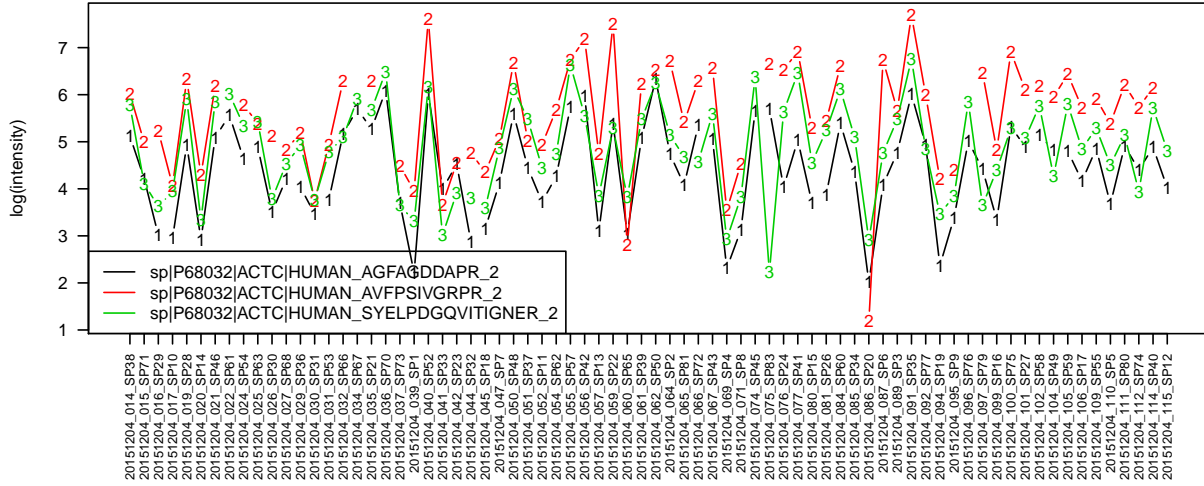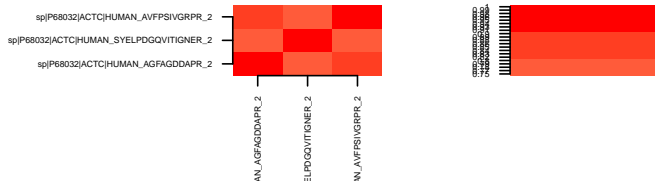

sp|P69905|HBA|HUMAN

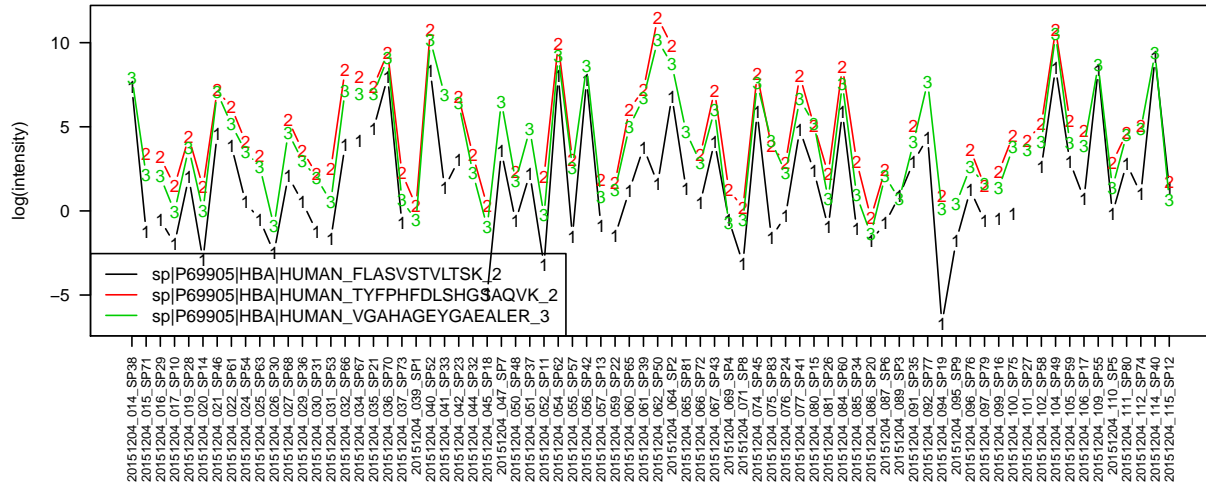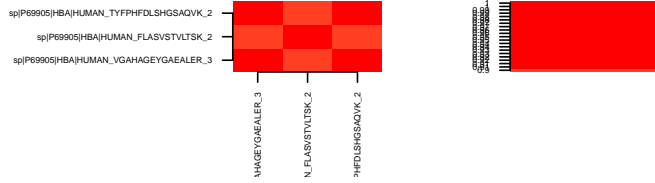

sp|P80723-1|BASP1|HUMAN

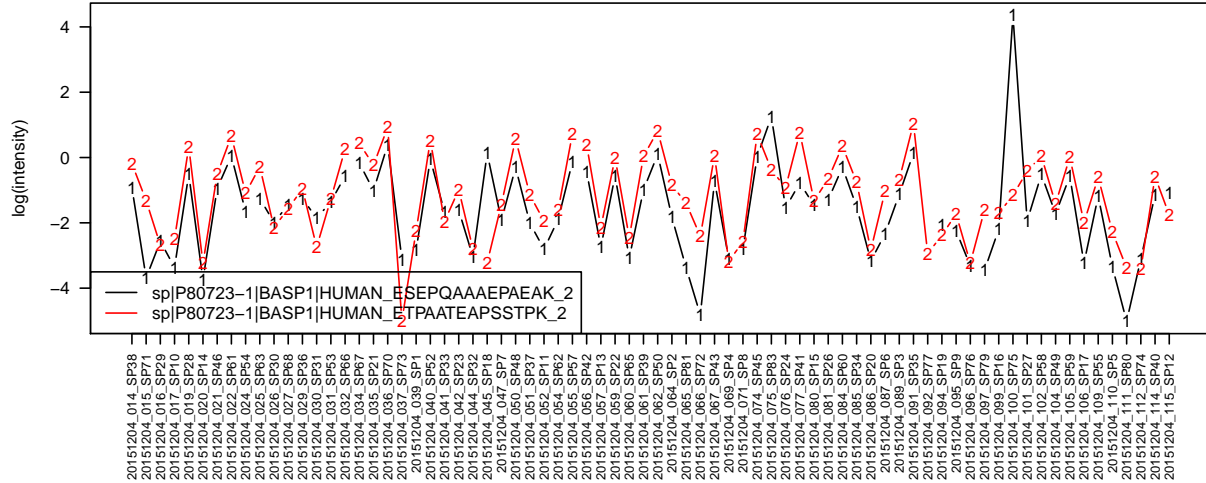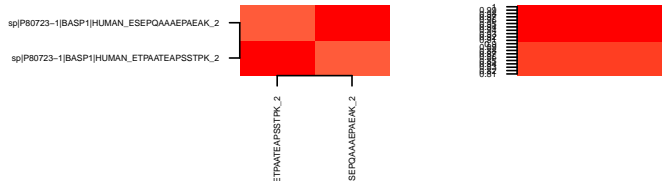

sp|Q14019|COTL1|HUMAN

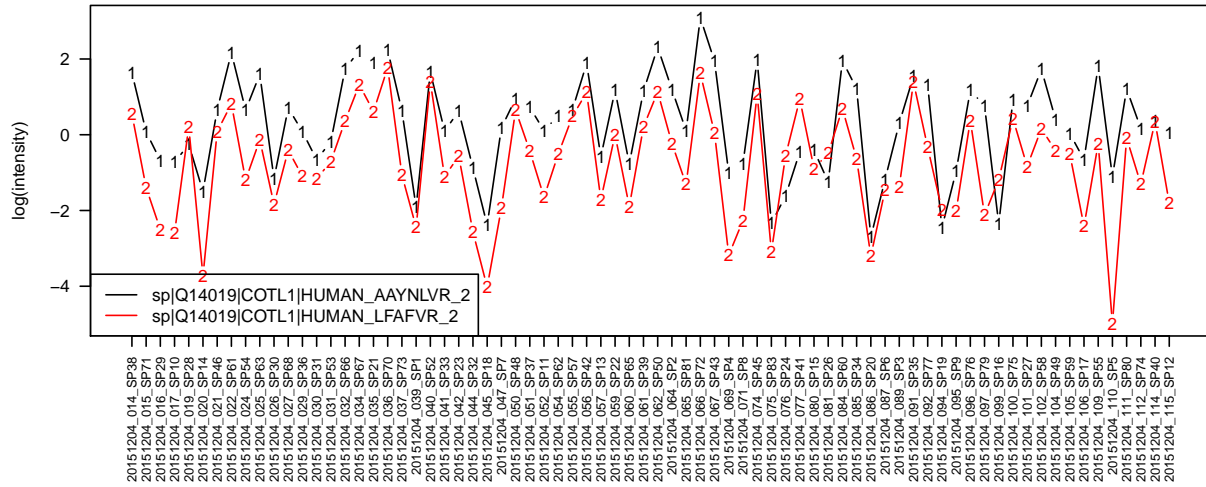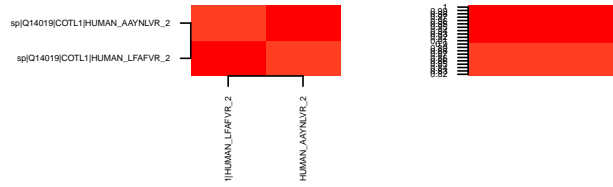

sp|Q16610-1|ECM1|HUMAN

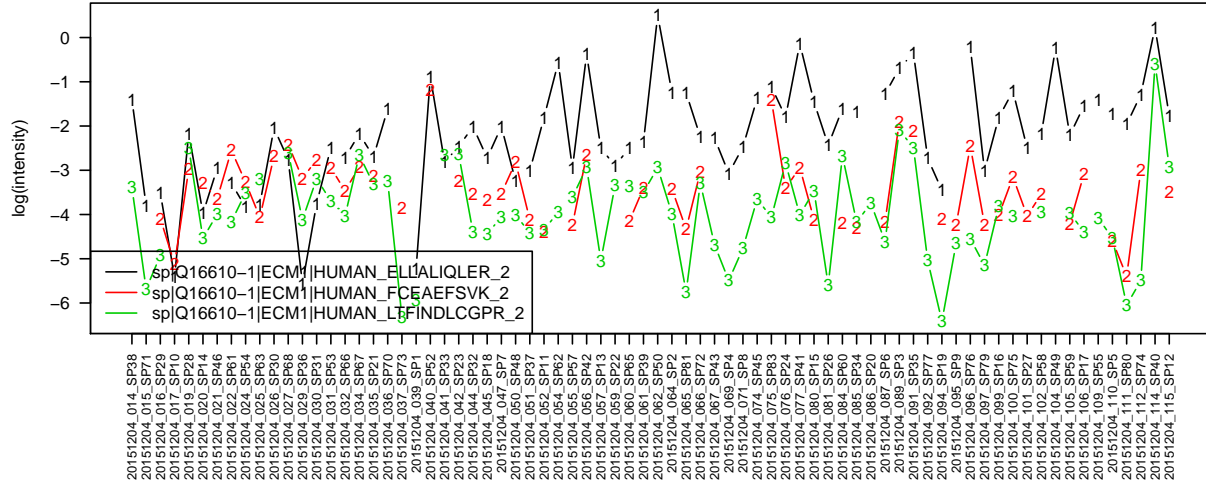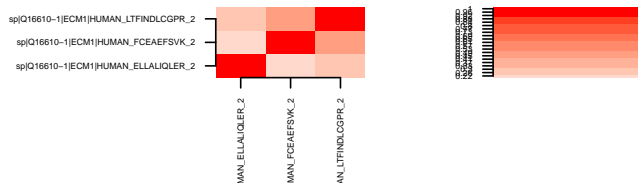

sp|Q9NP99-1|TREM1|HUMAN

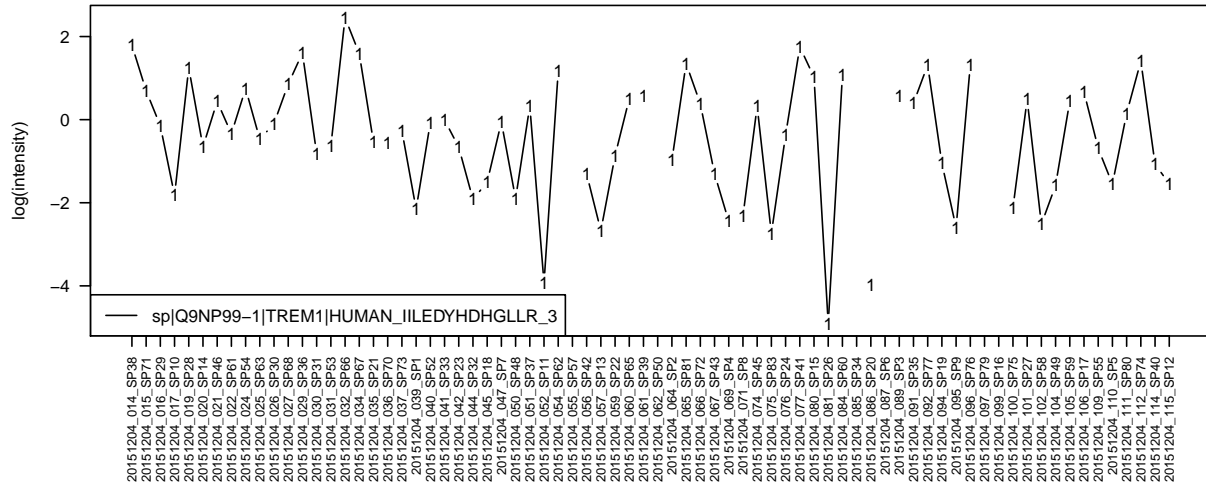

sp|Q9UGM3-1|DMBT1|HUMAN

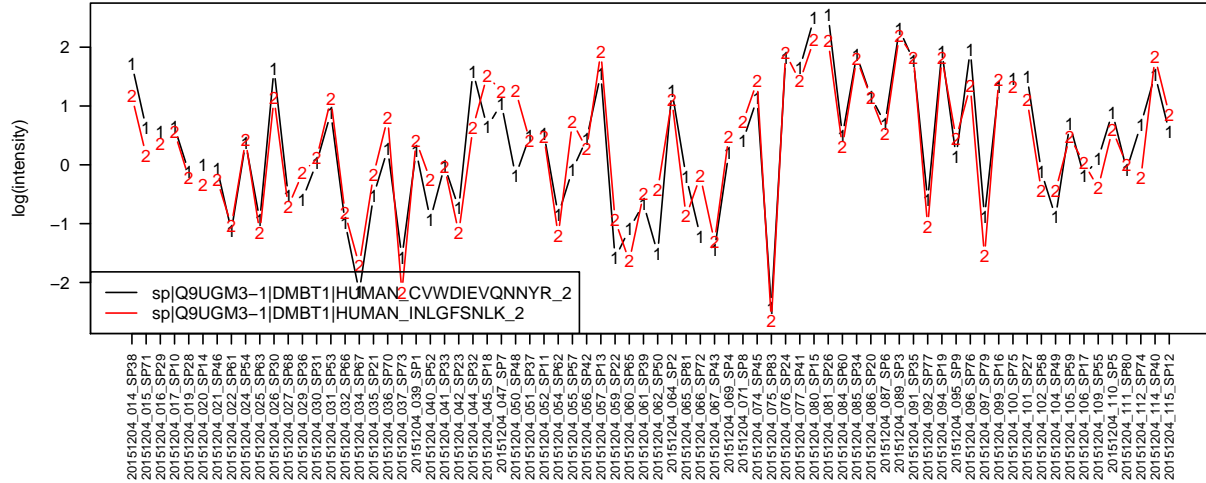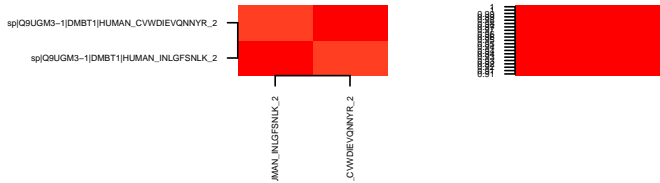

zz|ZZ|FGCZCont0031|

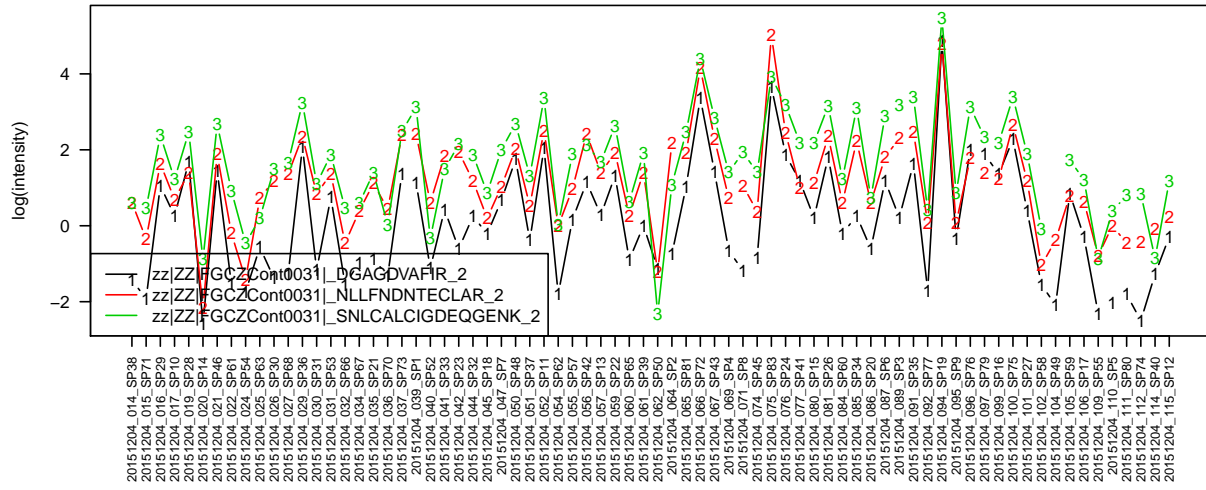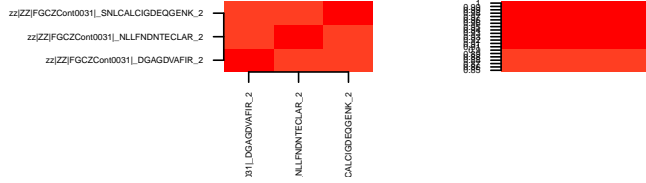

# Peptides used for quantification and their transitions

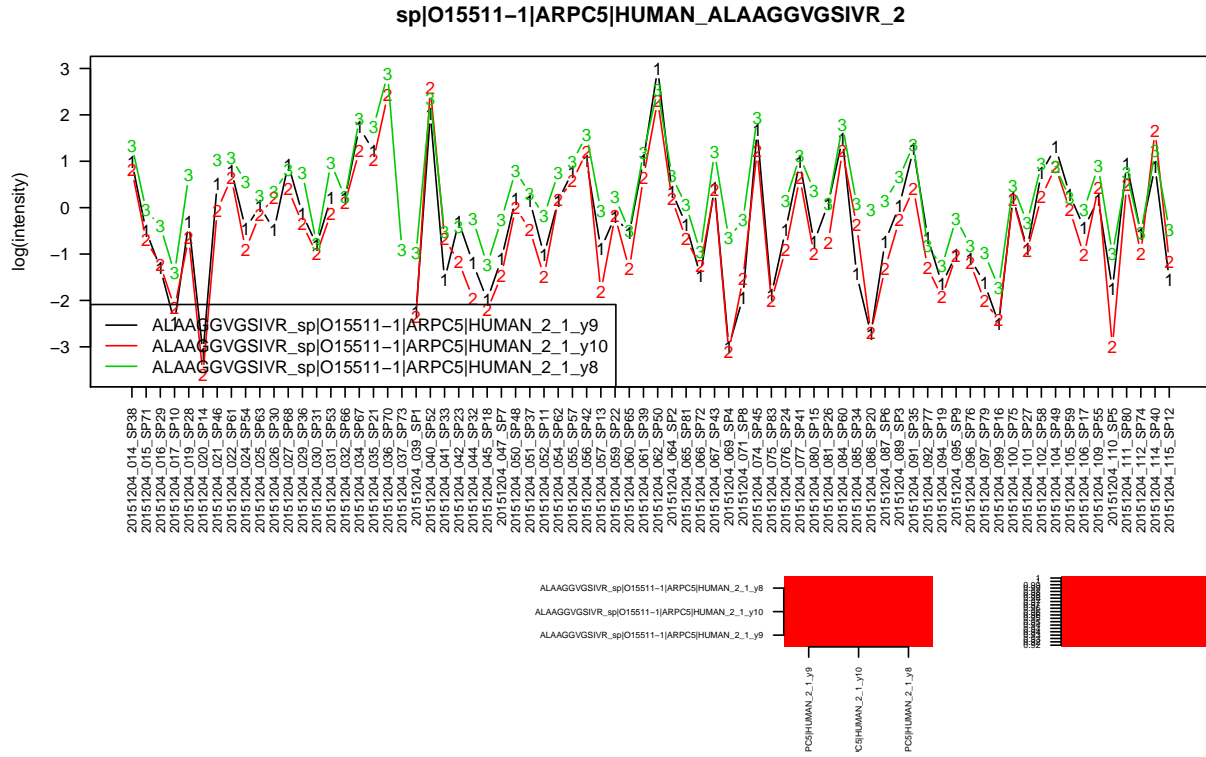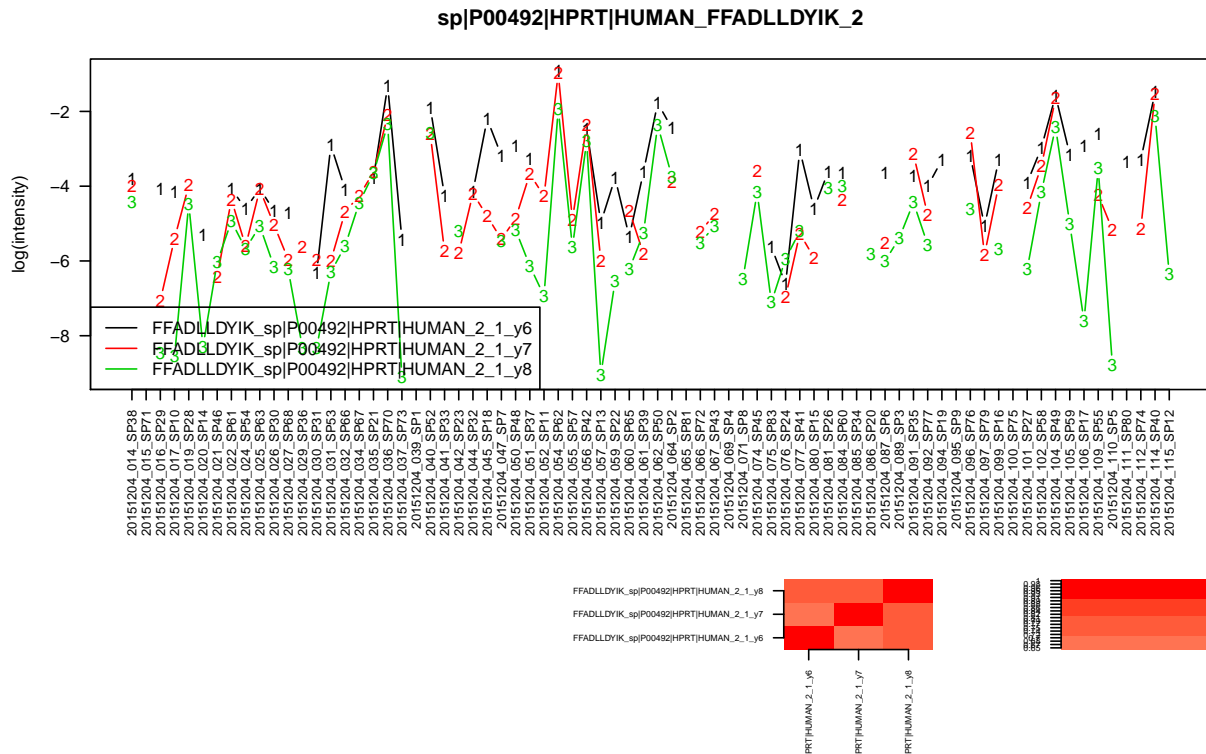



sp|P00492|HPRT|HUMAN\_VIGDDLSTLTGK\_2

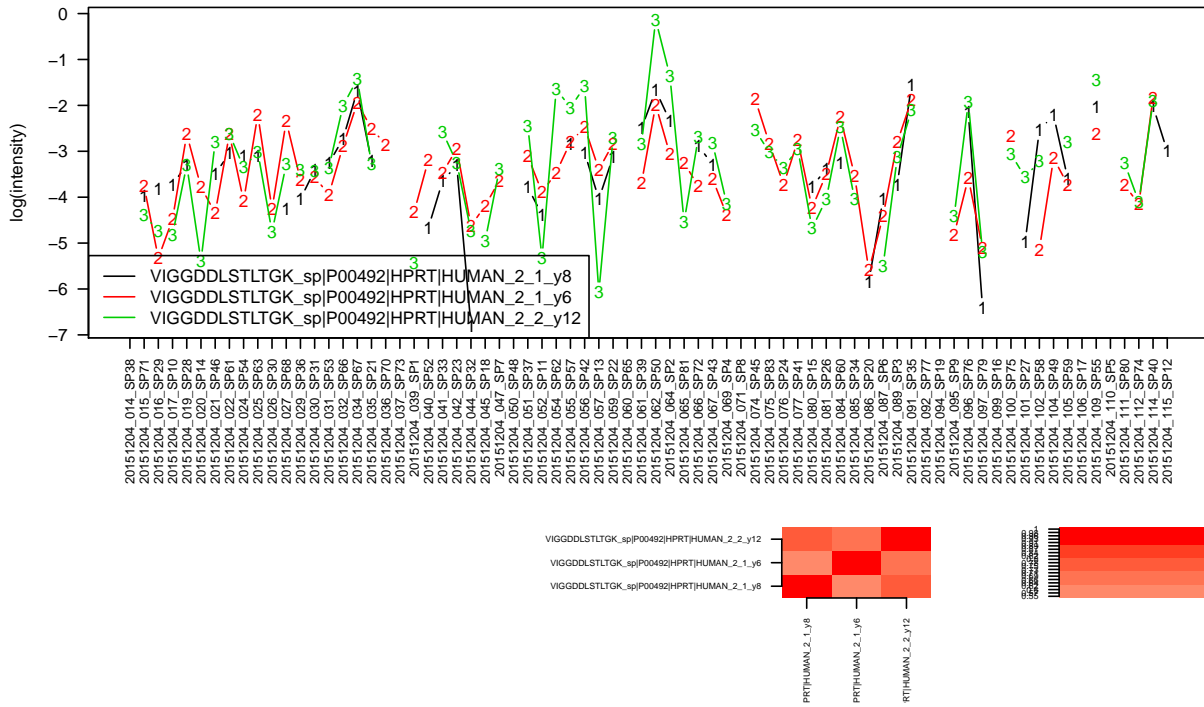

sp|P01023|A2MG|HUMAN\_AAQVTIQSSGTFSSK\_2

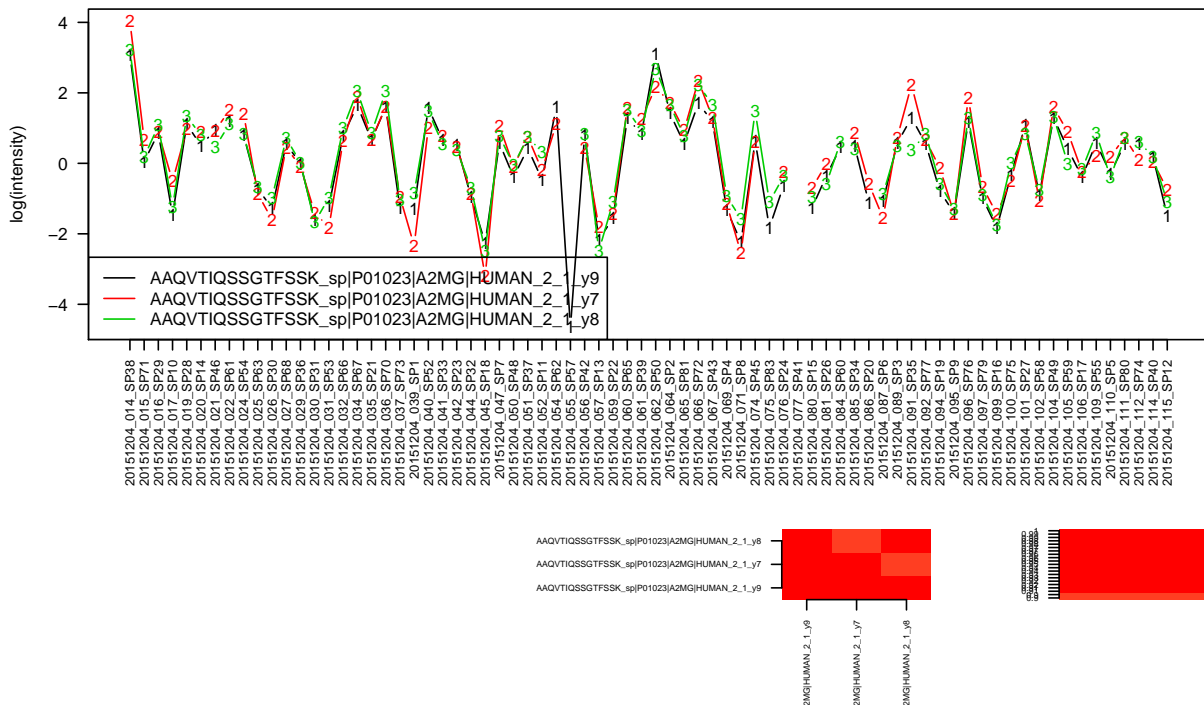

sp|P01023|A2MG|HUMAN\_NQGNTWLTAFLVK\_2

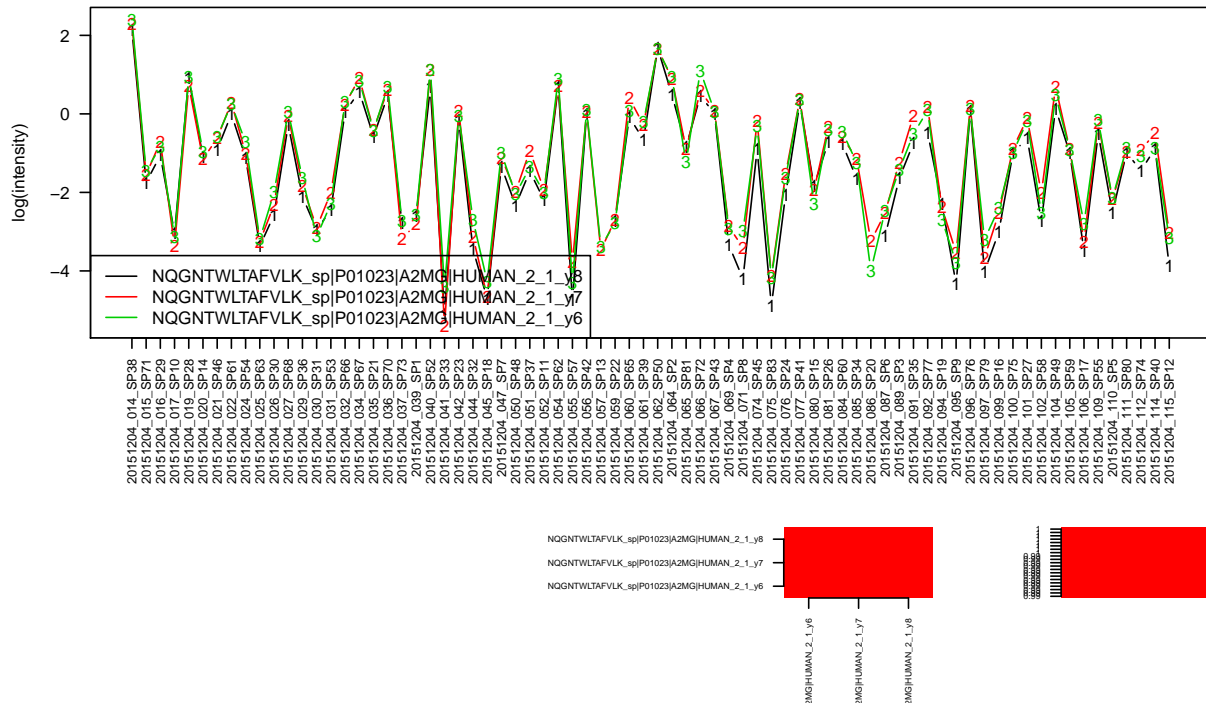

sp|P01023|A2MG|HUMAN\_VSVQLEASPAFLAVPVEK\_2

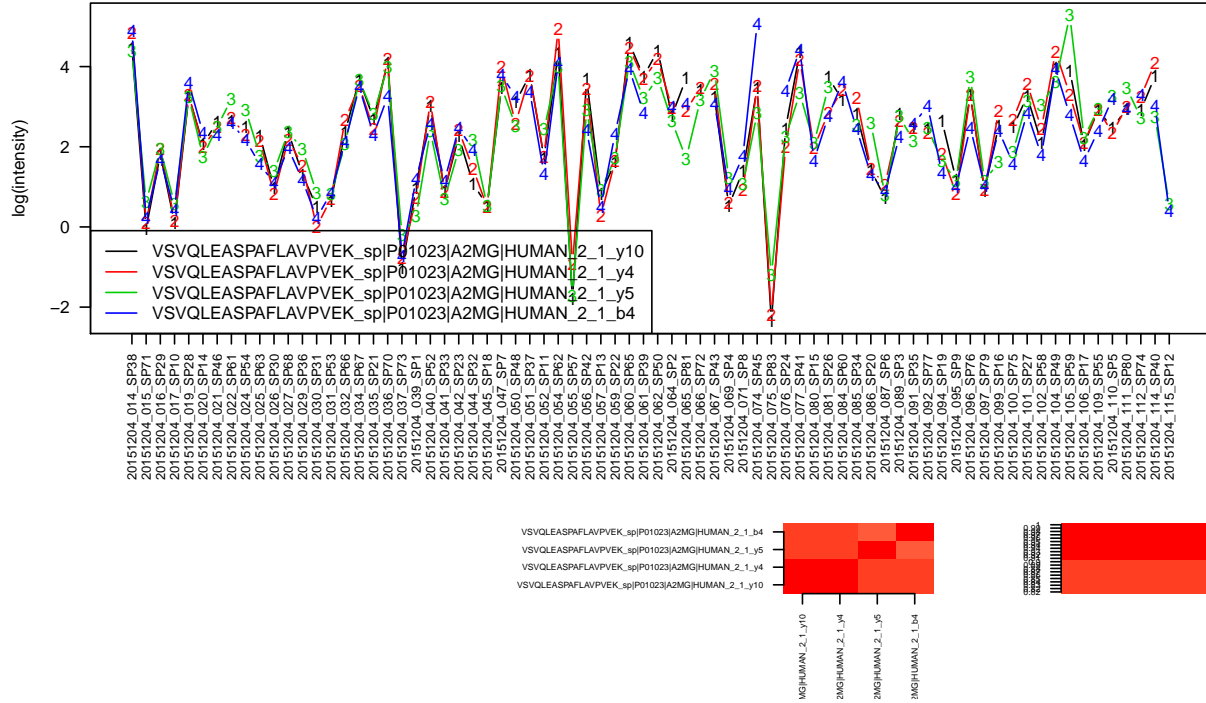

sp|P01034|CYTC|HUMAN\_ALDFAVGEYNK\_2

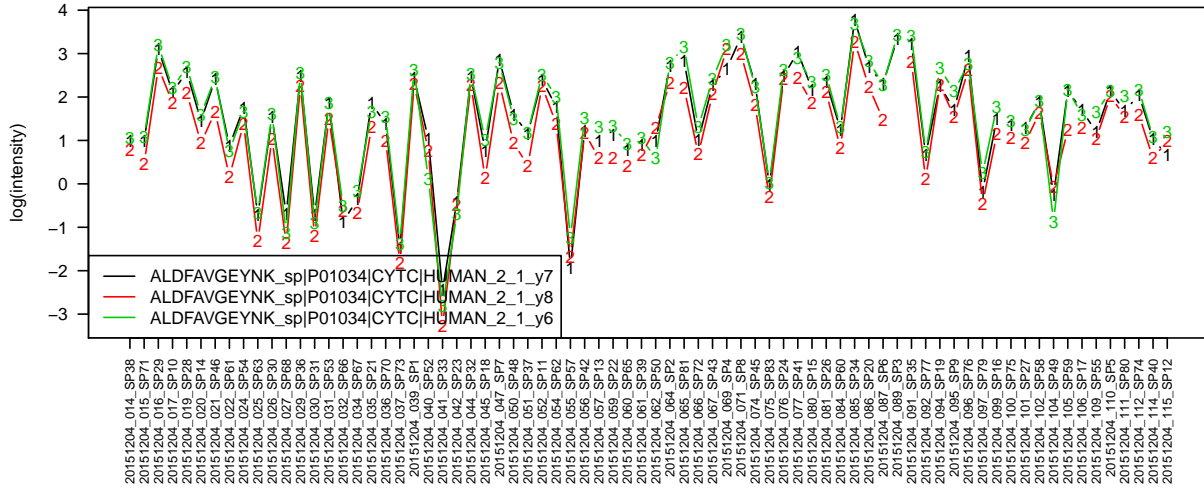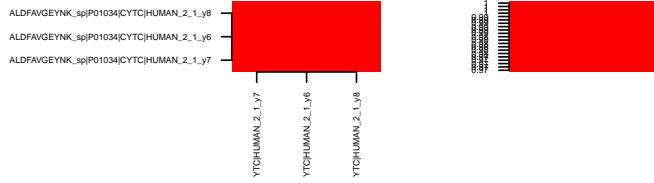

sp|P01034|CYTC|HUMAN\_ALQVVR\_2

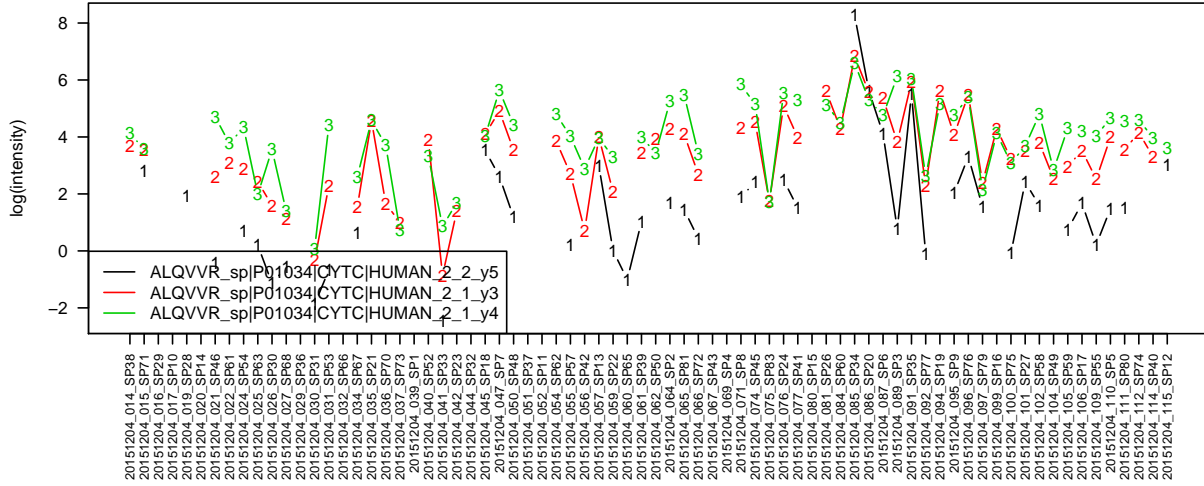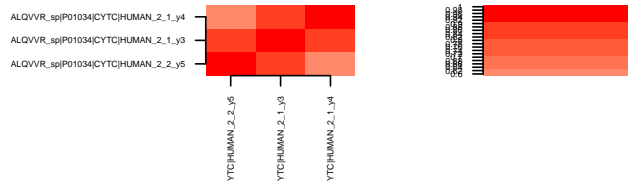

sp|P01034|CYTC|HUMAN\_ASNDMYHSR\_2

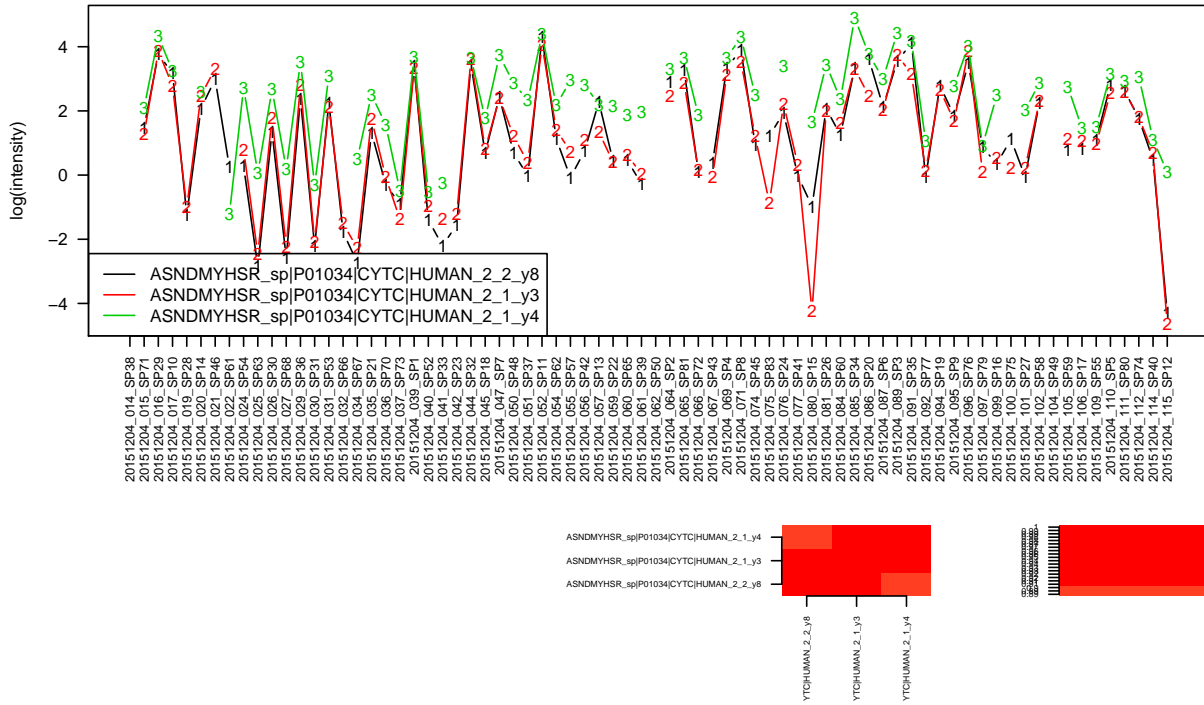

sp|P02675|FIBB|HUMAN\_DNENVVNEYSSELEK\_2

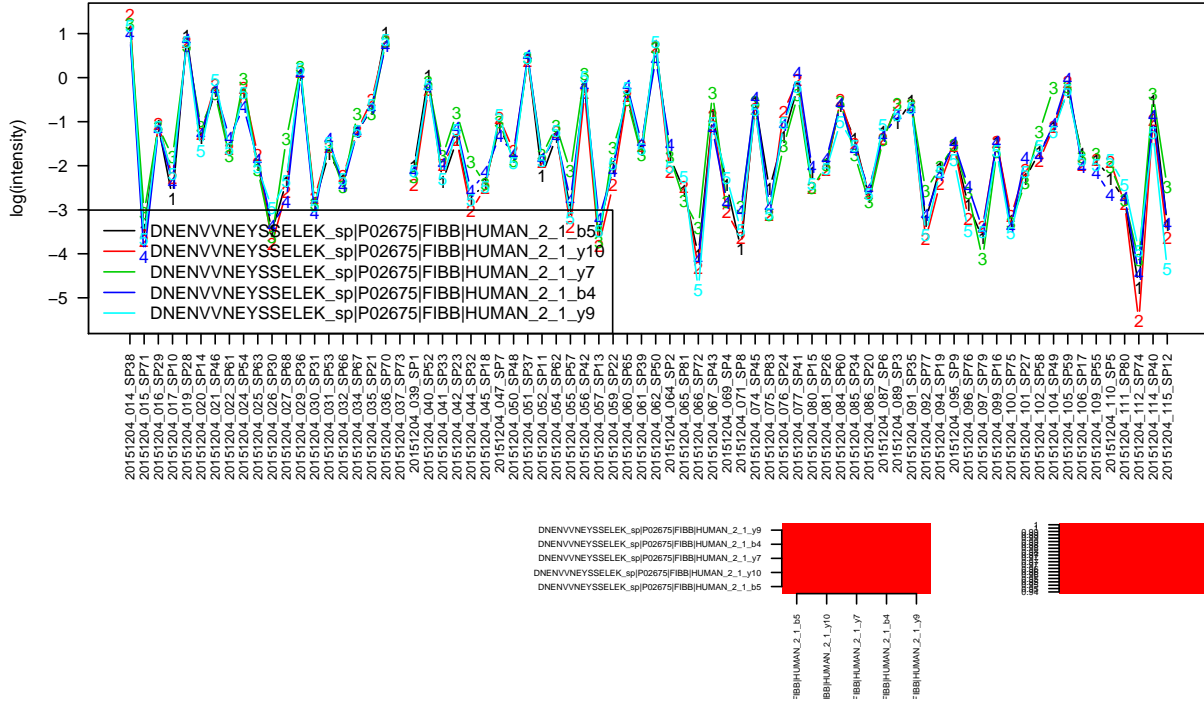

sp|P02675|FIBB|HUMAN\_EDGGGWYNR\_2

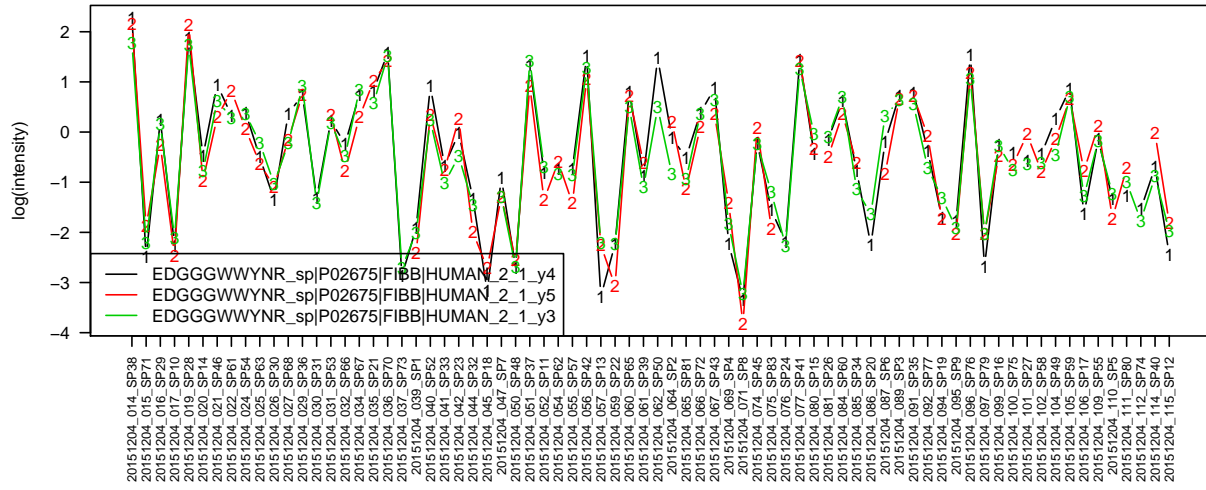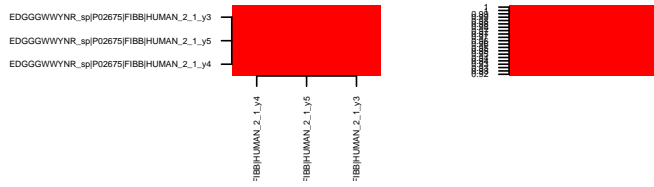

sp|P02675|FIBB|HUMAN\_QDGSVDFGR\_2

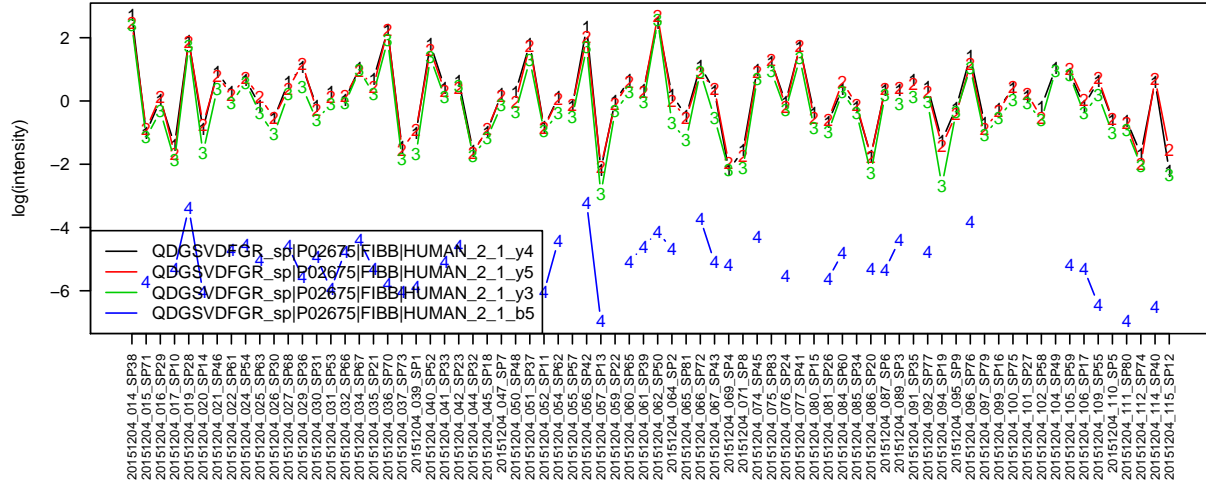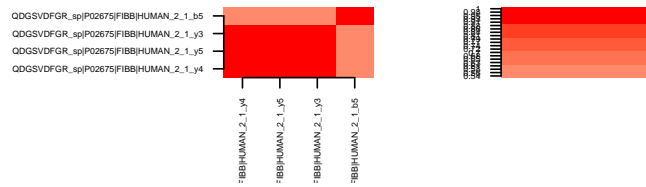

sp|P02768-1|ALBU|HUMAN\_FQNALLVR\_2

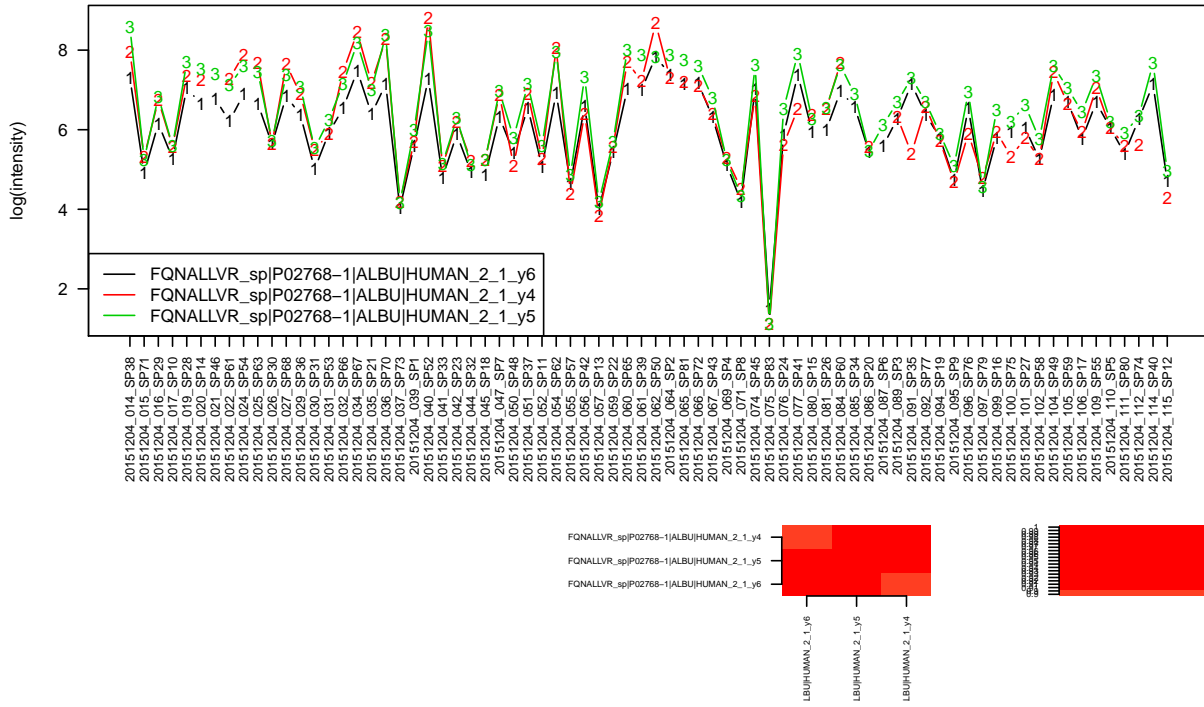

sp|P02768-1|ALBU|HUMAN\_QNCELFEQLGEYK\_2

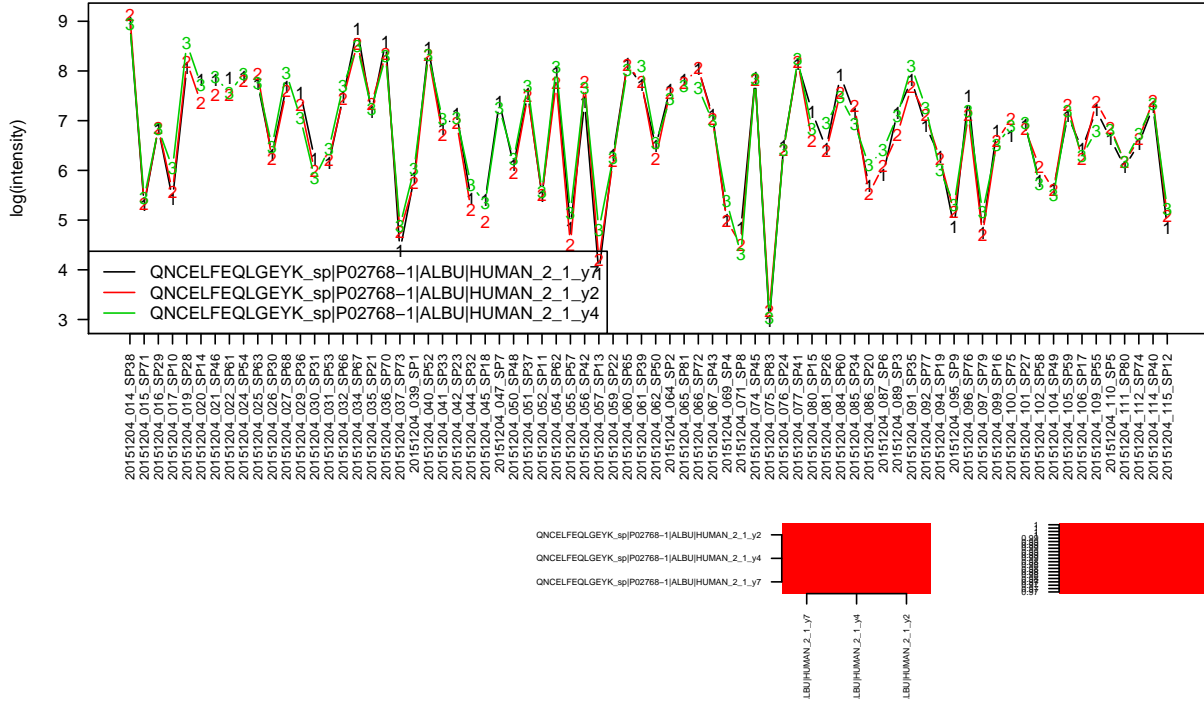

sp|P02768-1|ALBU|HUMAN\_VFDEFKPLVEEPQNLK\_3

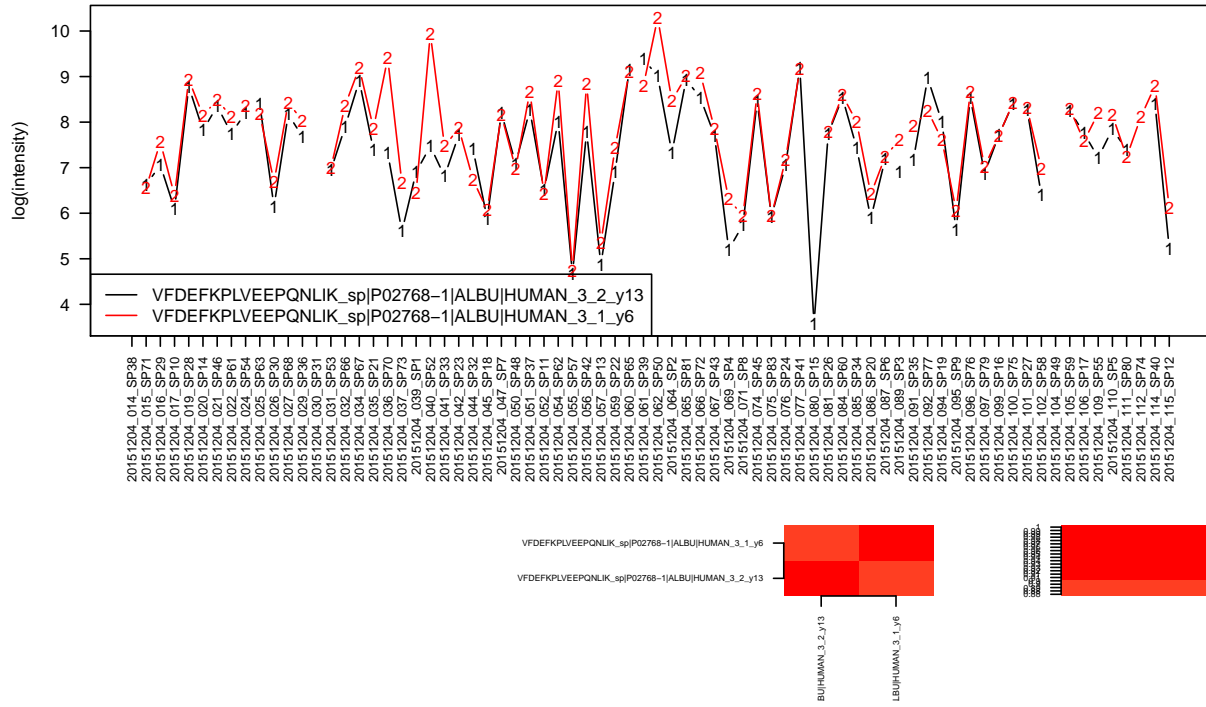

sp|P02790|HEMO|HUMAN\_QGHNSVFLIK\_3

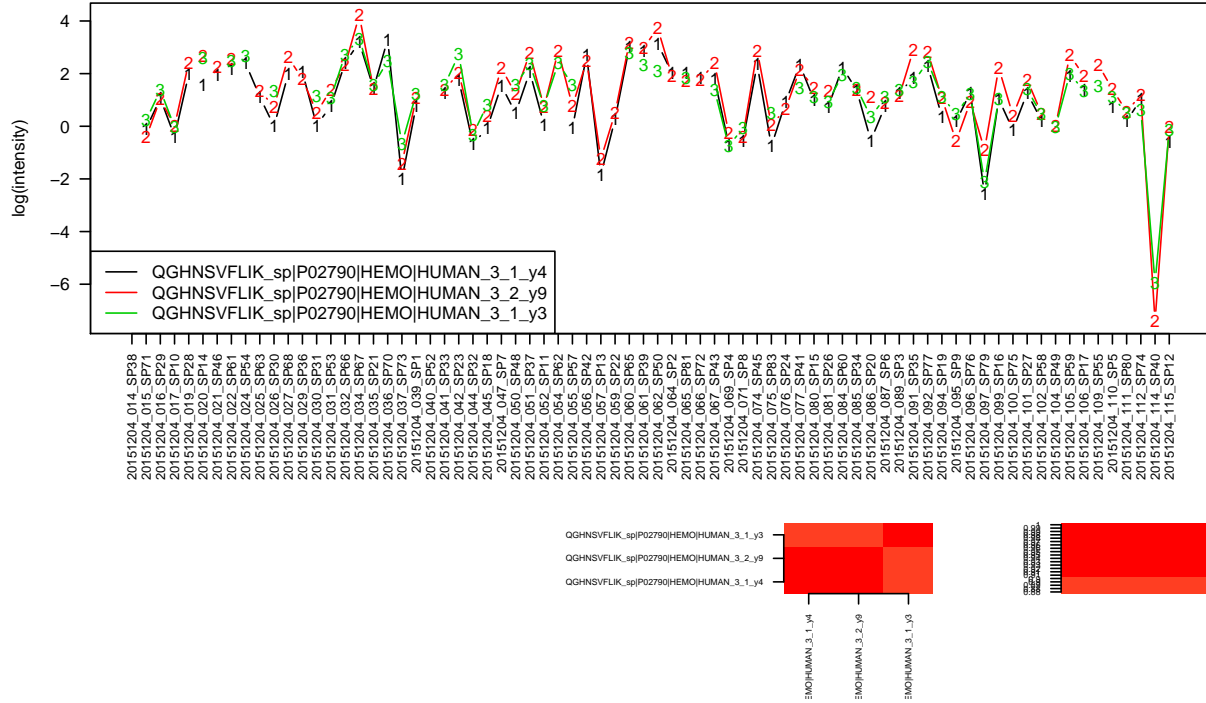

sp|P02790|HEMO|HUMAN\_SGAQATWTELPWPHEK\_3

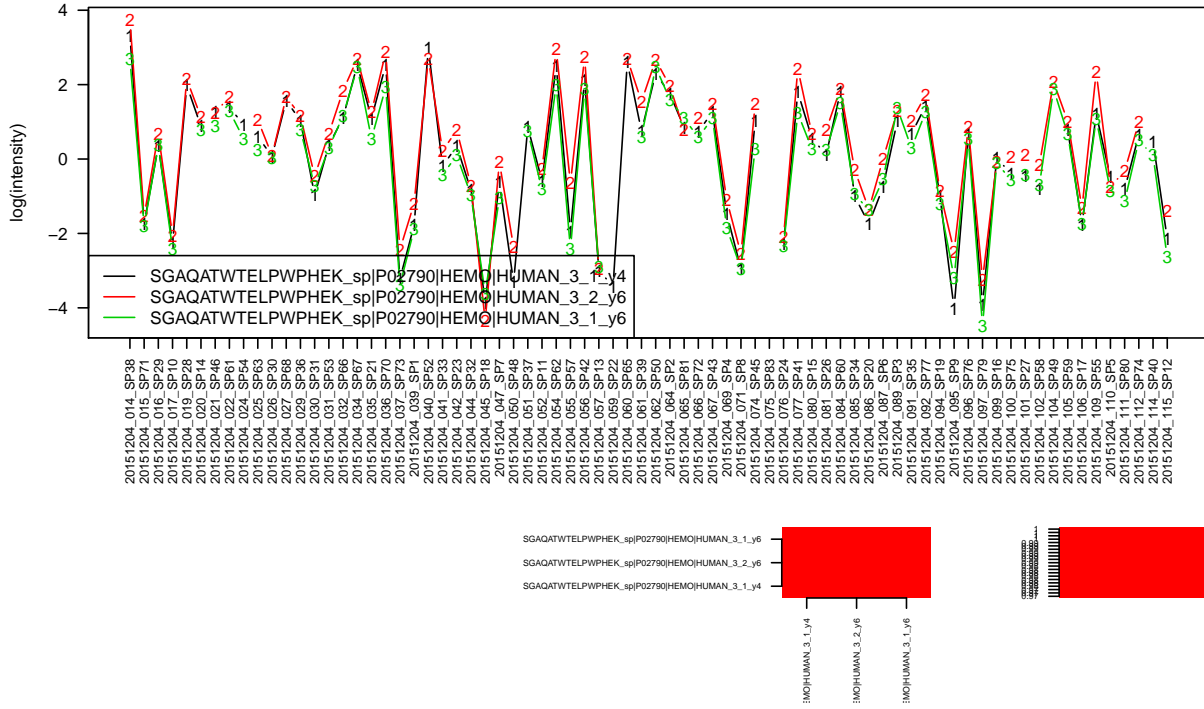

sp|P02790|HEMO|HUMAN\_VWVYPPEK\_2

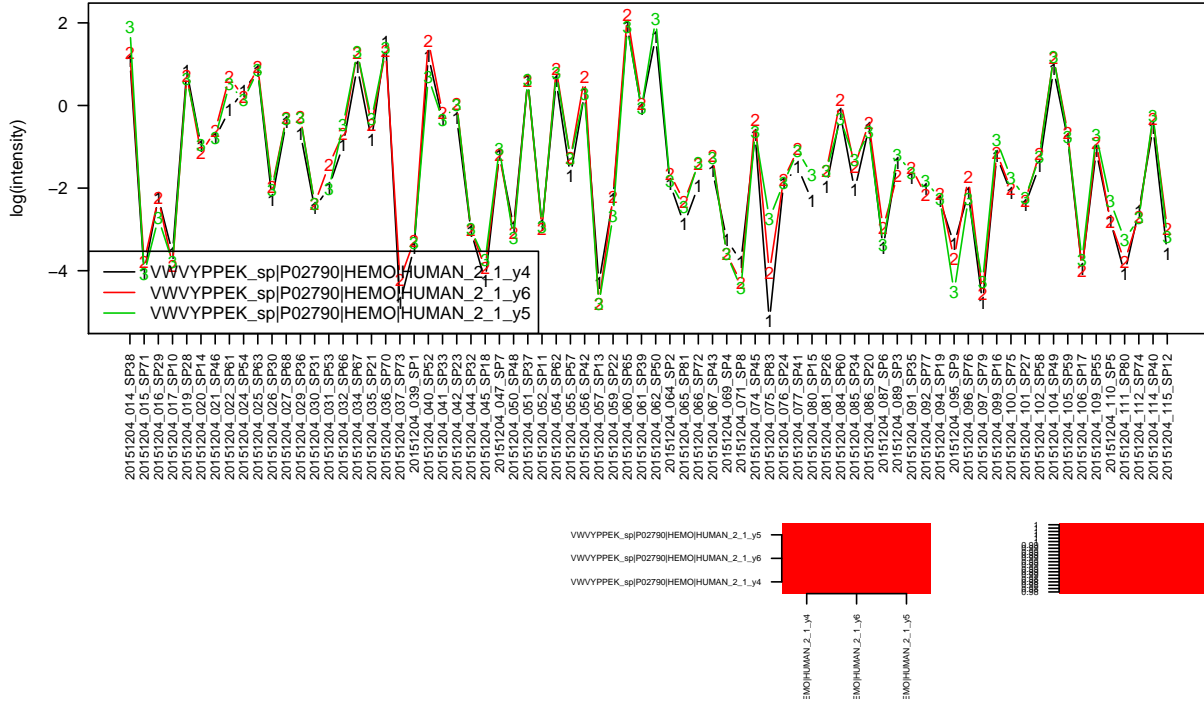



sp|P04083|ANXA1|HUMAN\_ALTGHLEEVLLALK\_3

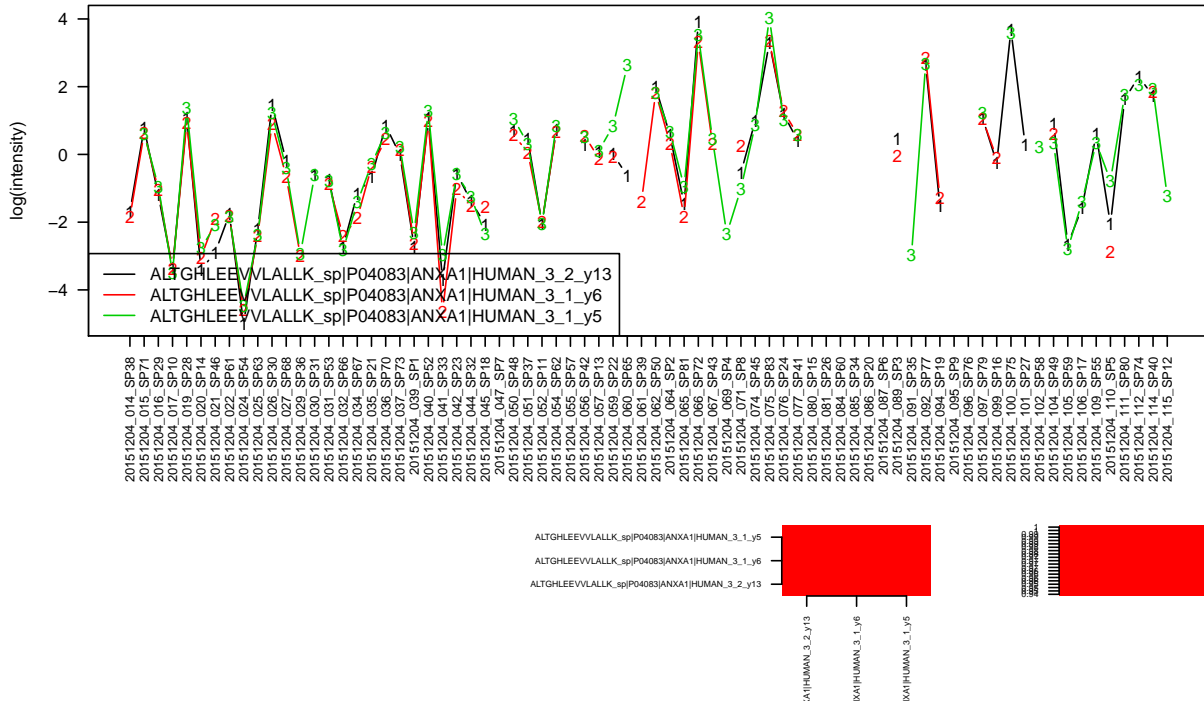

sp|P04083|ANXA1|HUMAN\_GLGTDEDTLIEILASR\_2

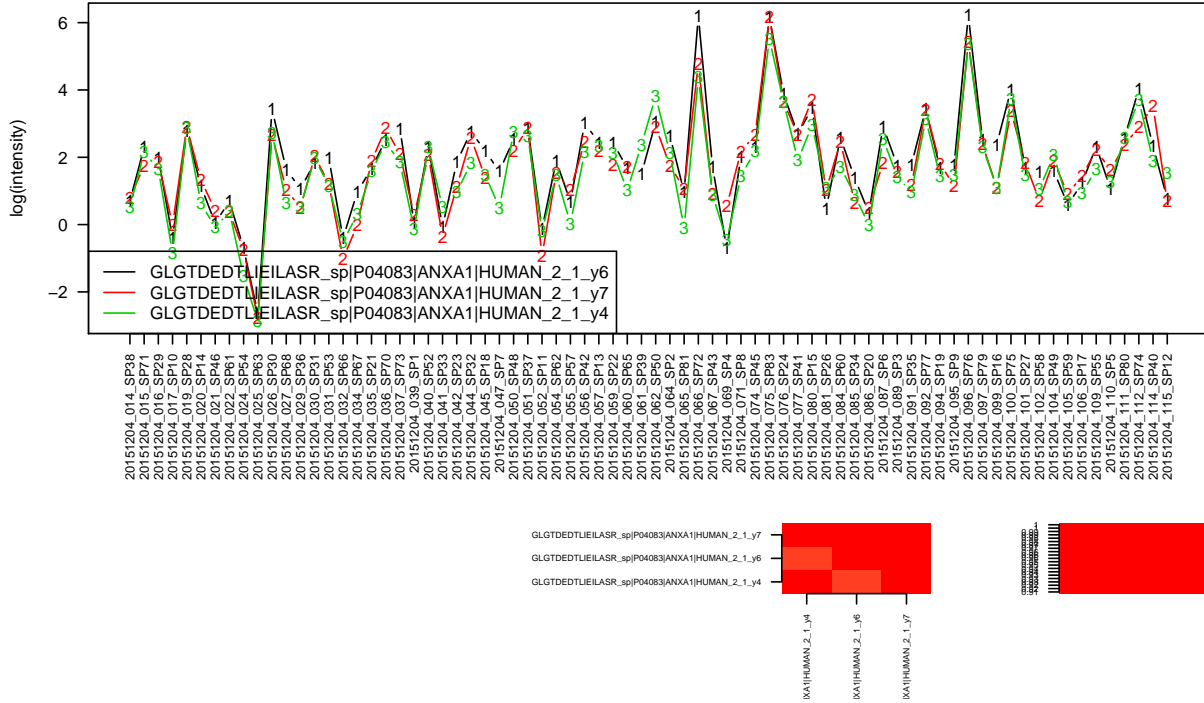

sp|P04083|ANXA1|HUMAN\_GVDEATIIDLTK\_2

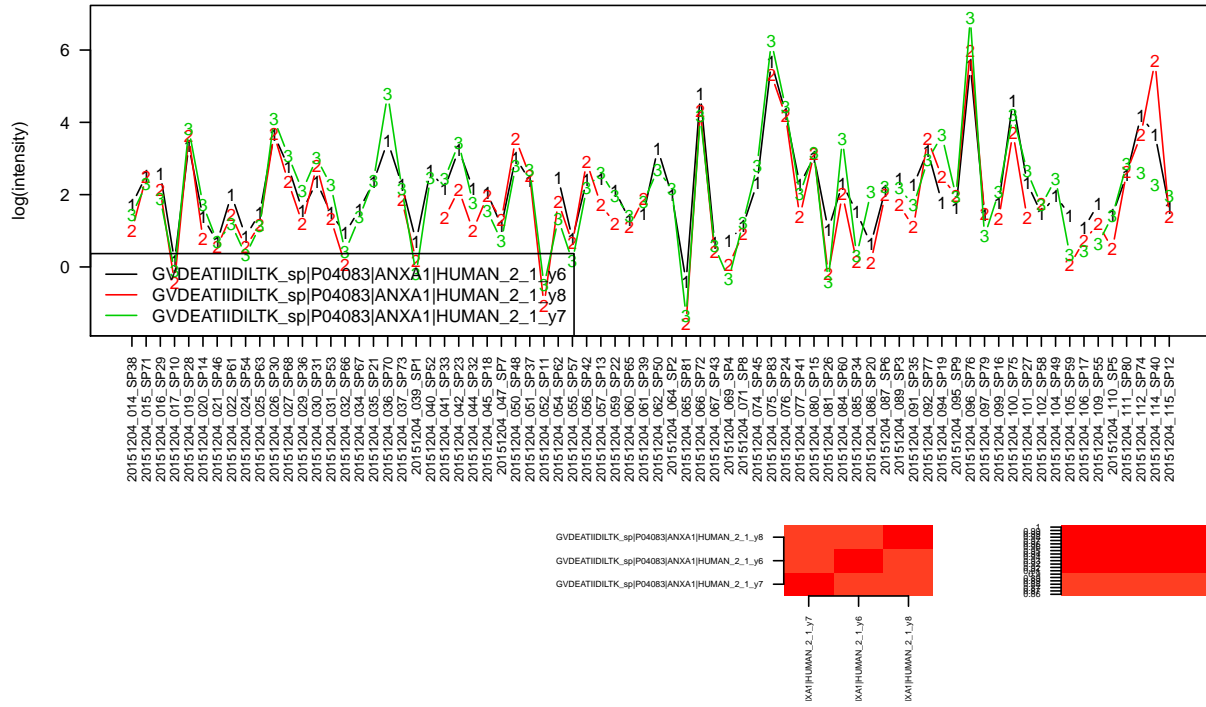

sp|P05109|S10A8|HUMAN\_ALNSIIDVYHK\_2

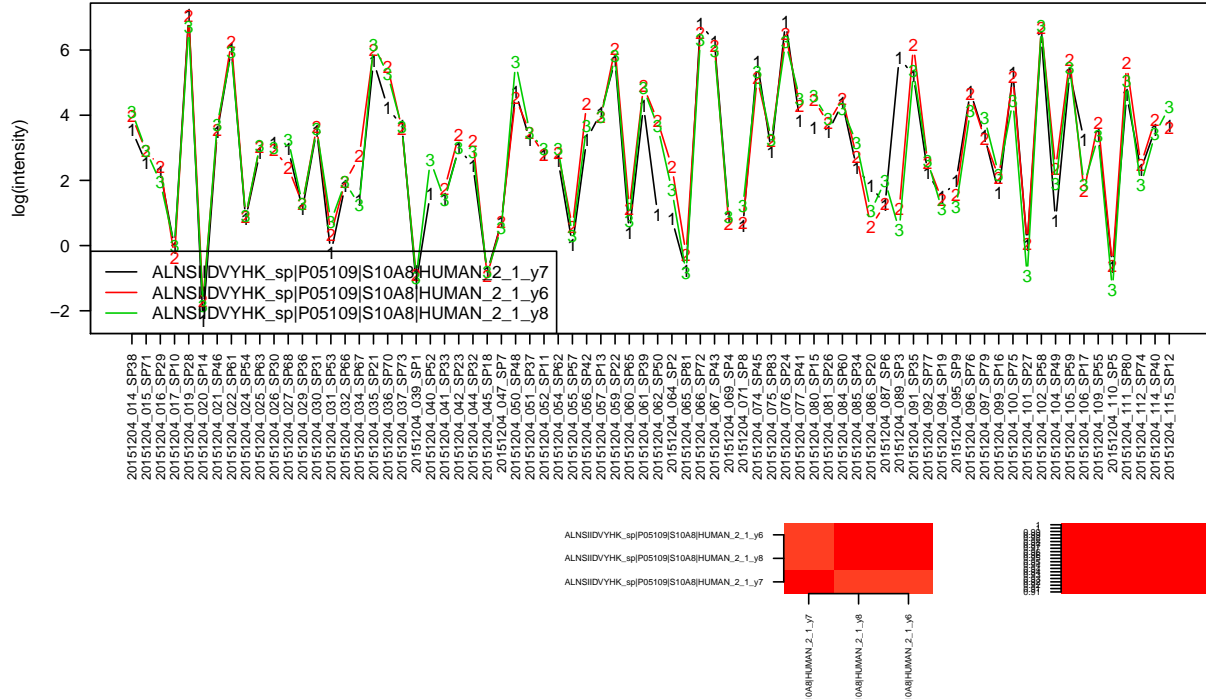

sp|P05109|S10A8|HUMAN\_LLETECPQYIR\_2

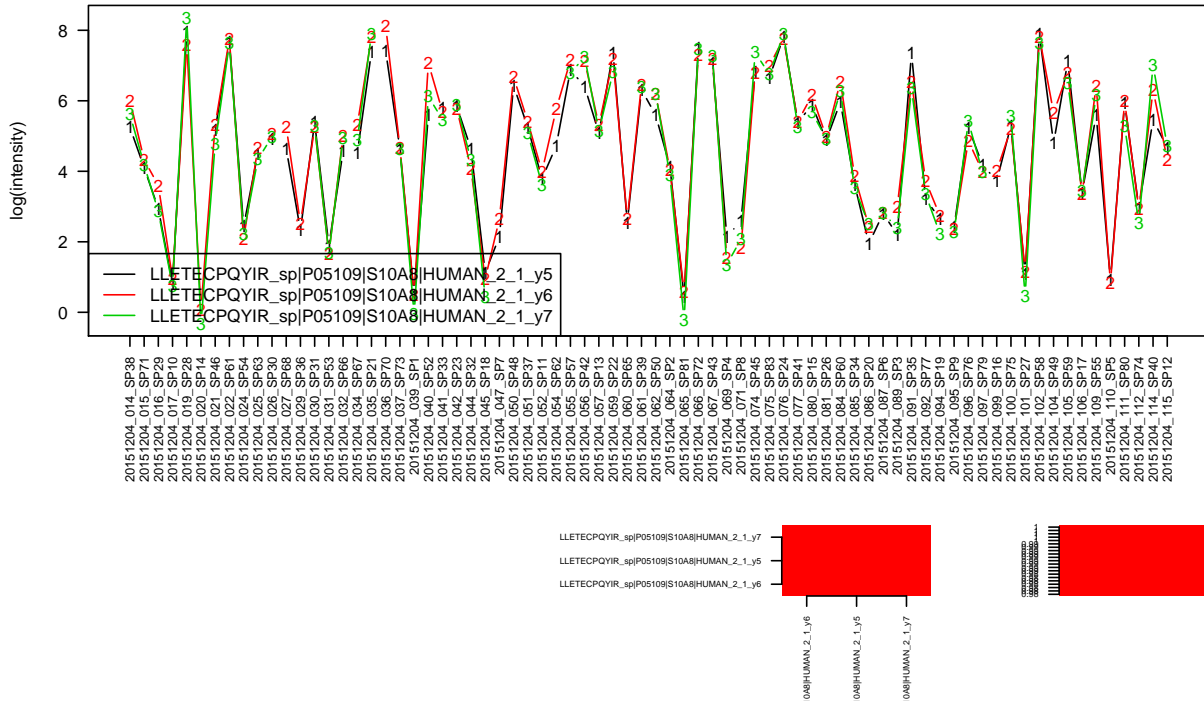

sp|P05204|HMGN2|HUMAN\_LSAKPAPPKPEPKPK\_3

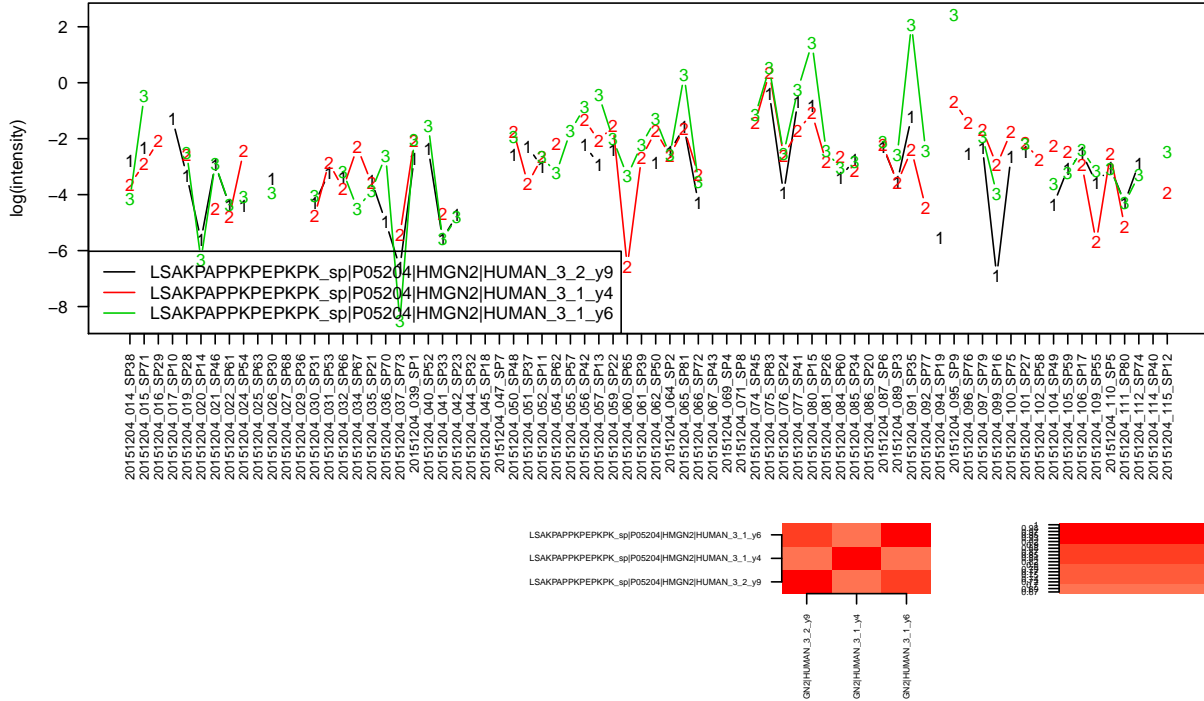

sp|P06733-1|ENOA|HUMAN\_IGAEVYHNLK\_2

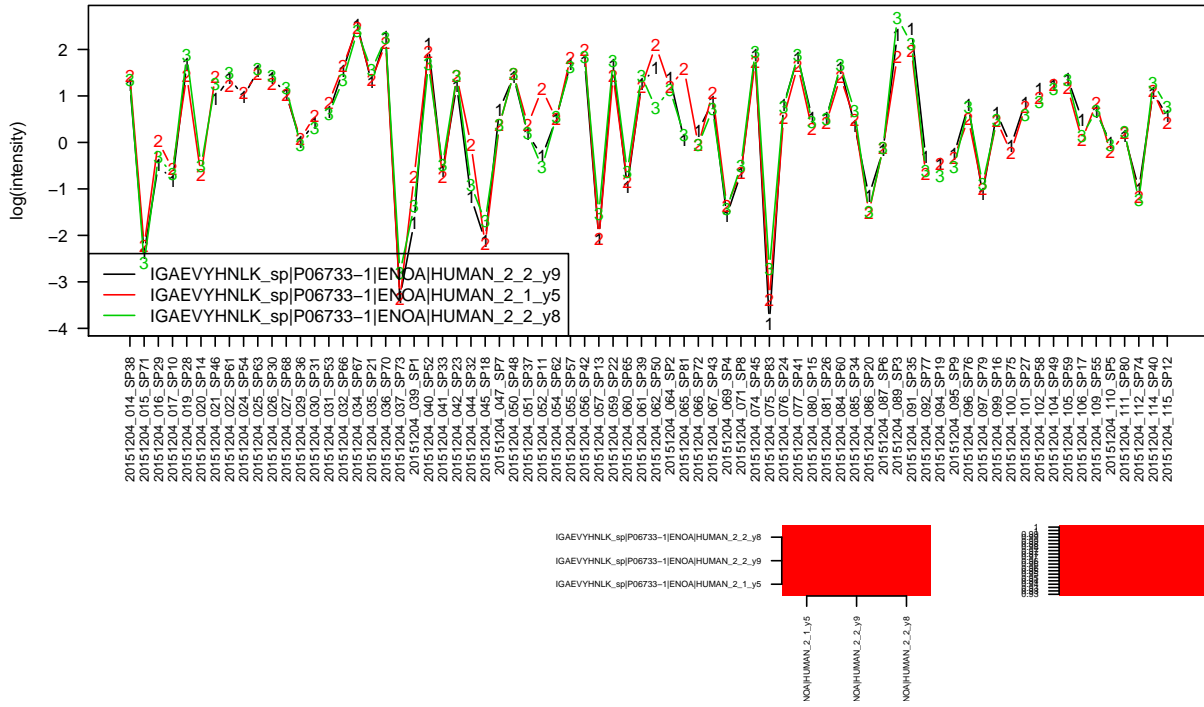

sp|P06733-1|ENOA|HUMAN\_YISPDQLADLYK\_2

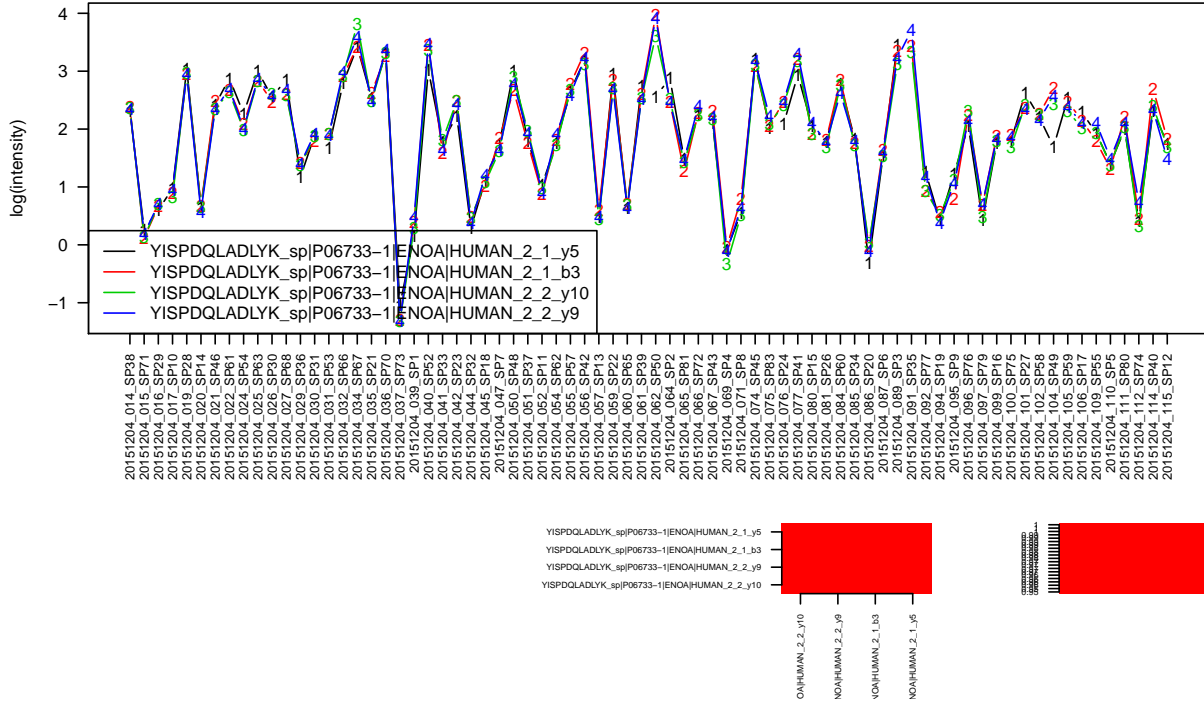

sp|P08246|ELNE|HUMAN\_LGNGVQCLAMGWLLGR\_2

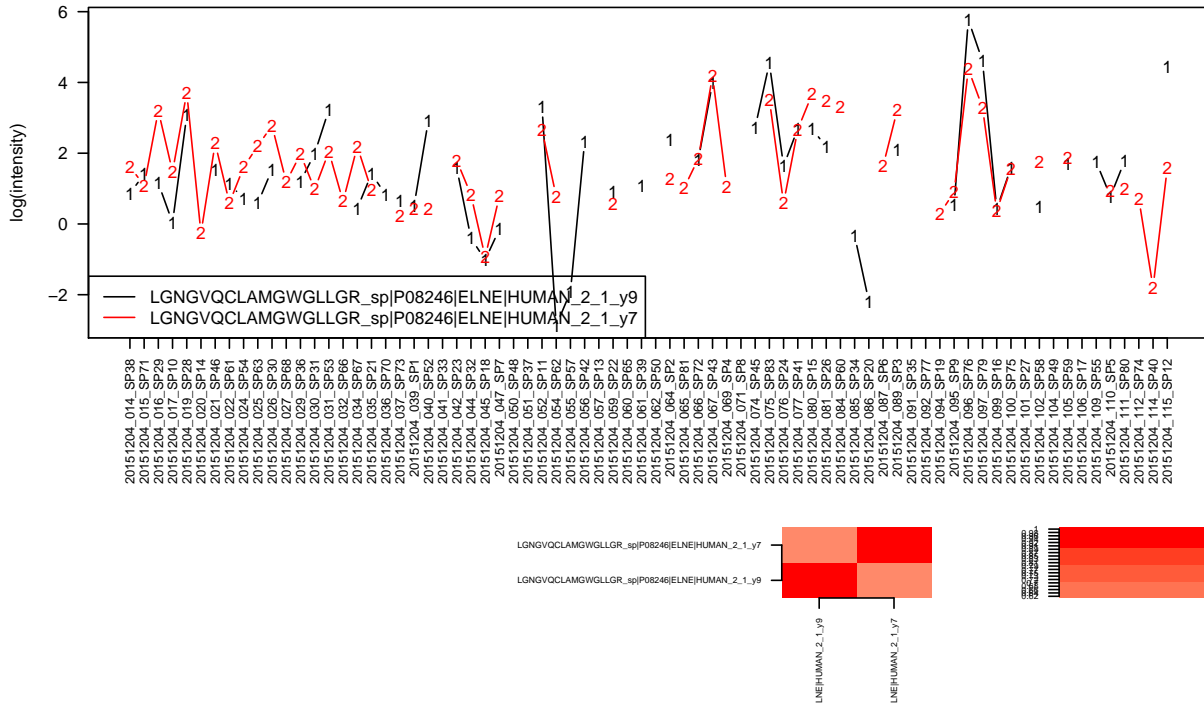

sp|P08246|ELNE|HUMAN\_SNVCTLVR\_2

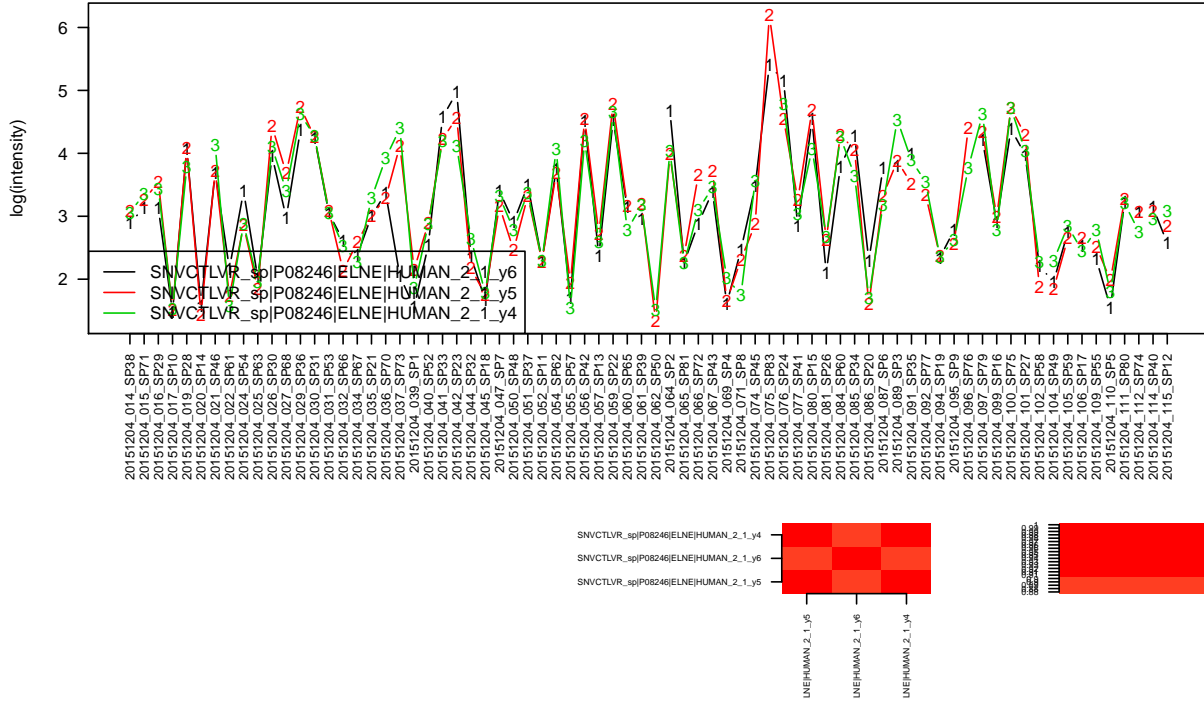

sp|P08246|ELNE|HUMAN\_VVLGAHNSLR\_3

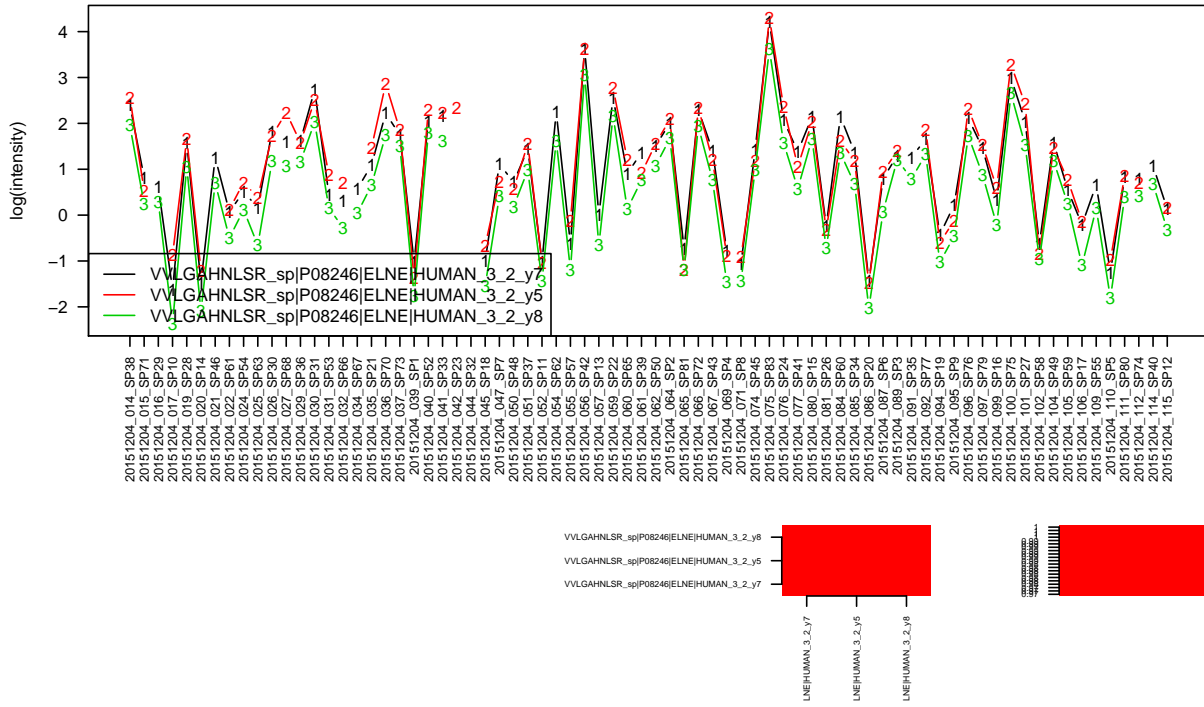

sp|P0C0S8|H2A1|HUMAN\_AGLQFPVGR\_2

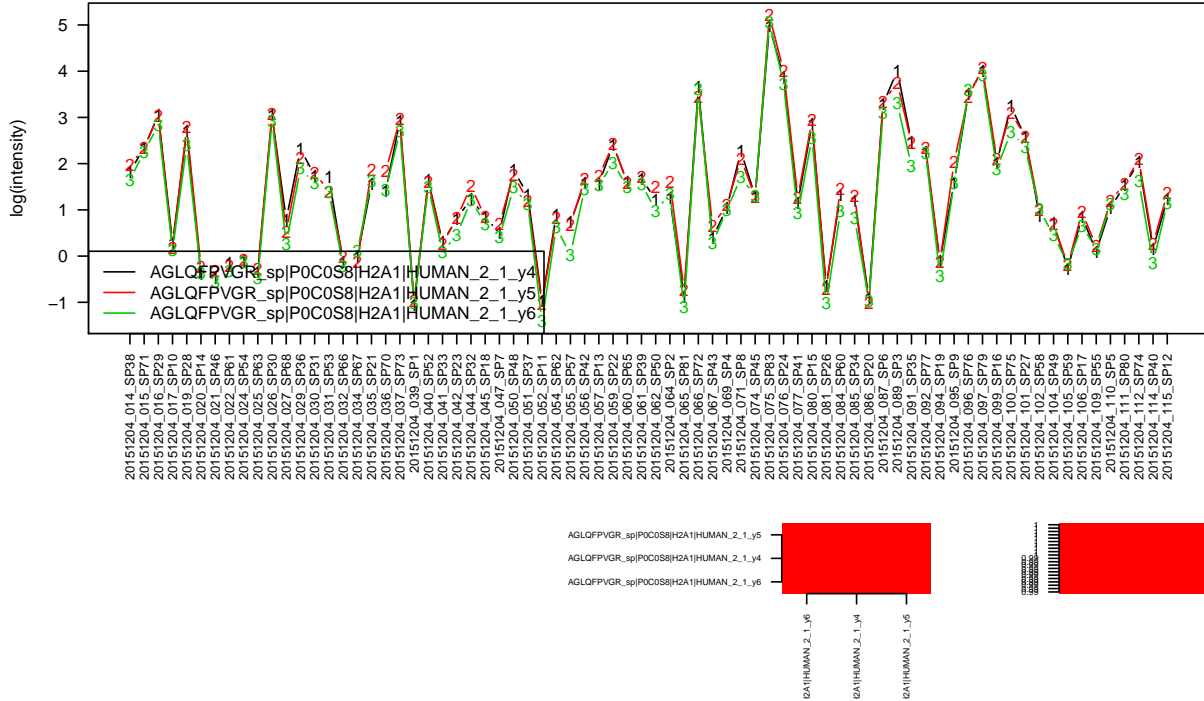

sp|P0C0S8|H2A1|HUMAN\_HLQLAIR\_2

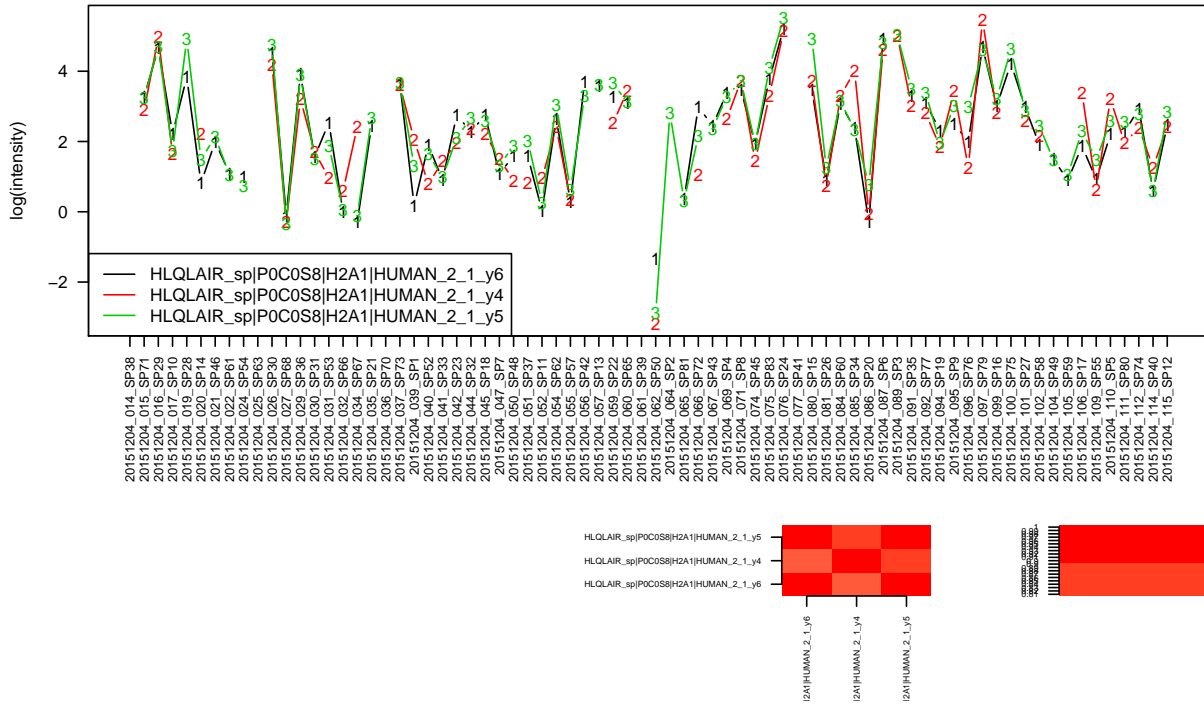

sp|P0C0S8|H2A1|HUMAN\_VTIAQGGVLPNIQAVLLPK\_2

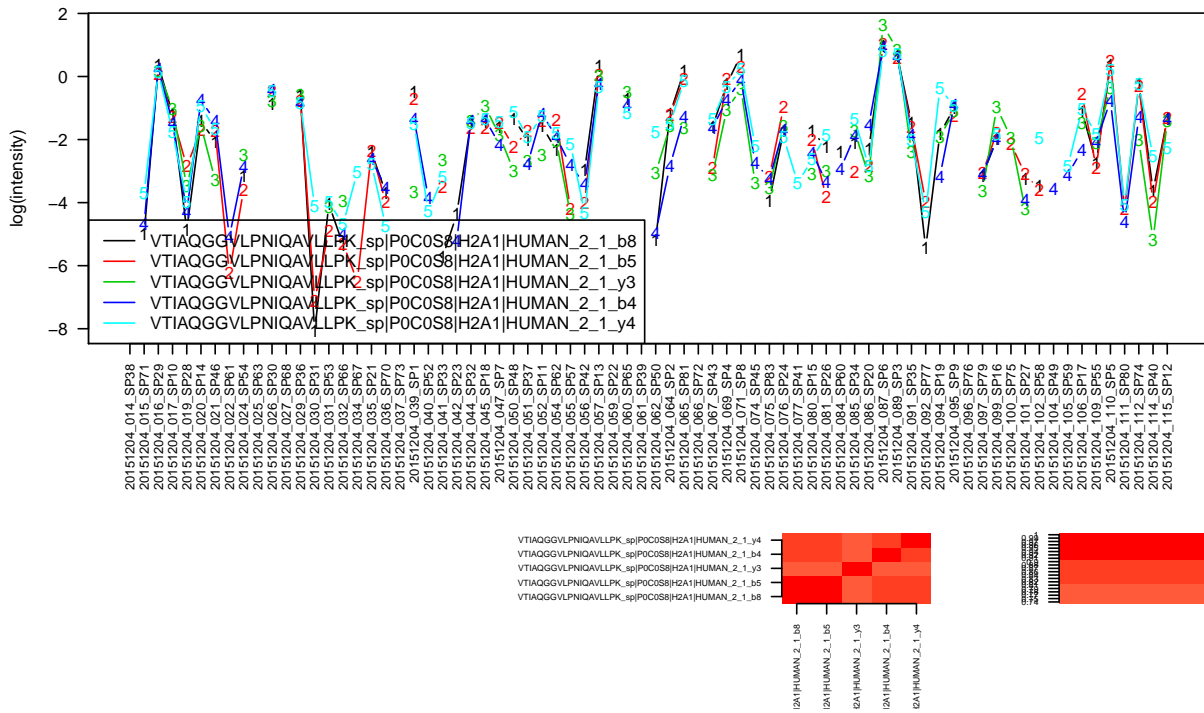

sp|P10909-1|CLUS|HUMAN\_ASSIIDELFQDR\_2

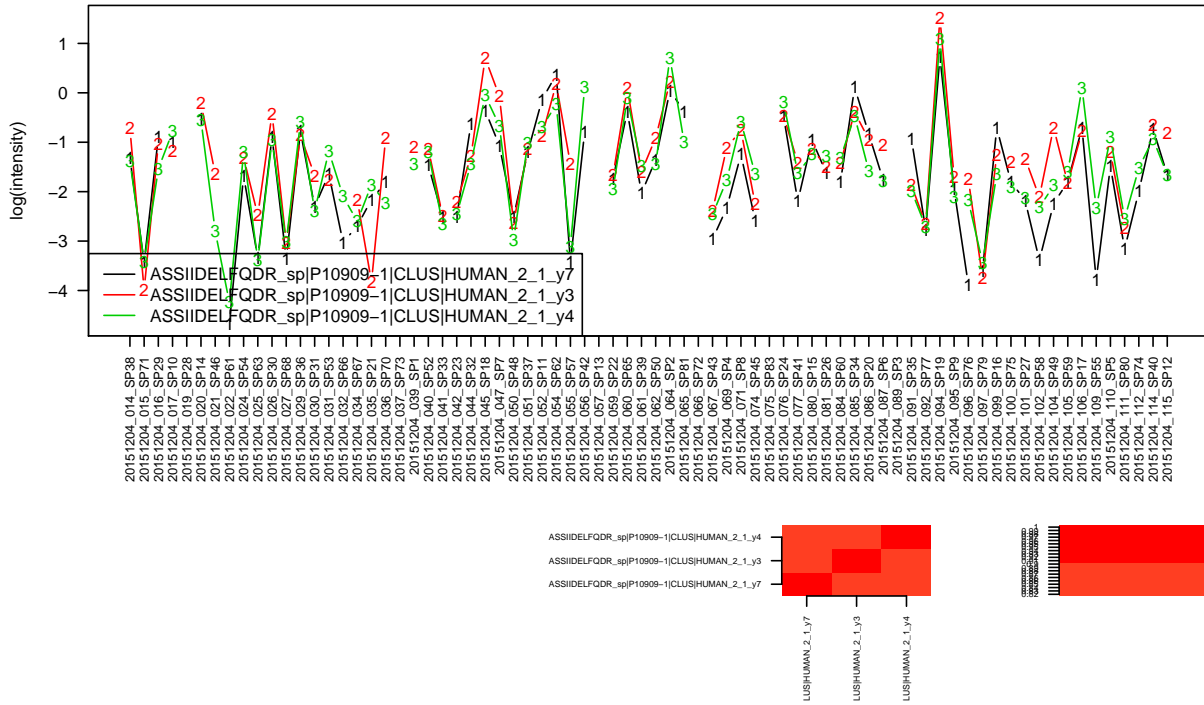

sp|P10909-1|CLUS|HUMAN\_EILSVDCSTNNPSQAK\_2

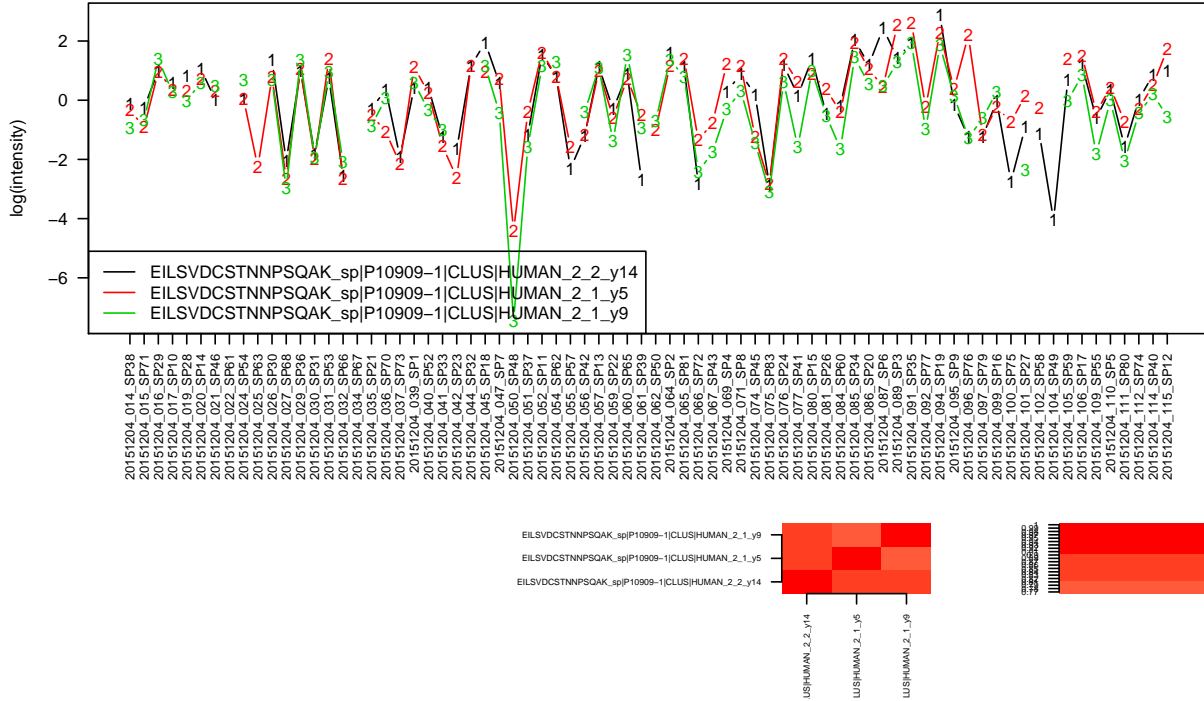



sp|P10909-1|CLUS|HUMAN\_LFDSDPITVTVPEVSR\_2

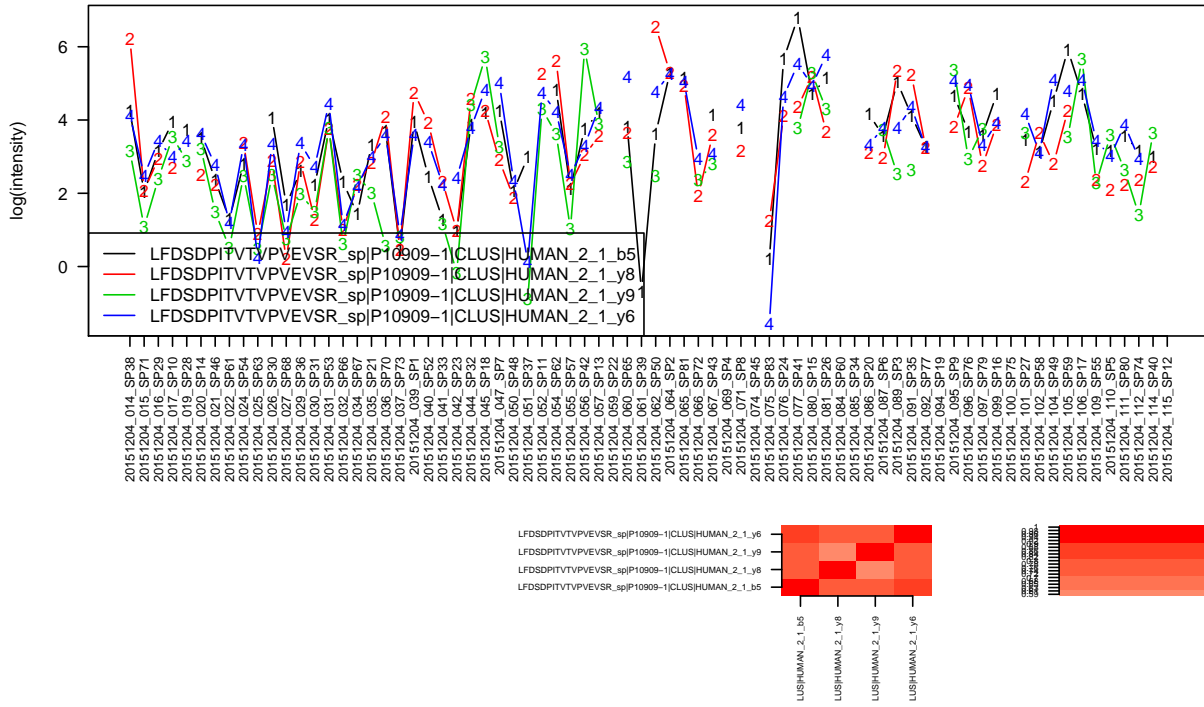

sp|P14780|MMP9|HUMAN\_FGNADGAACHFPFIFEGR\_3

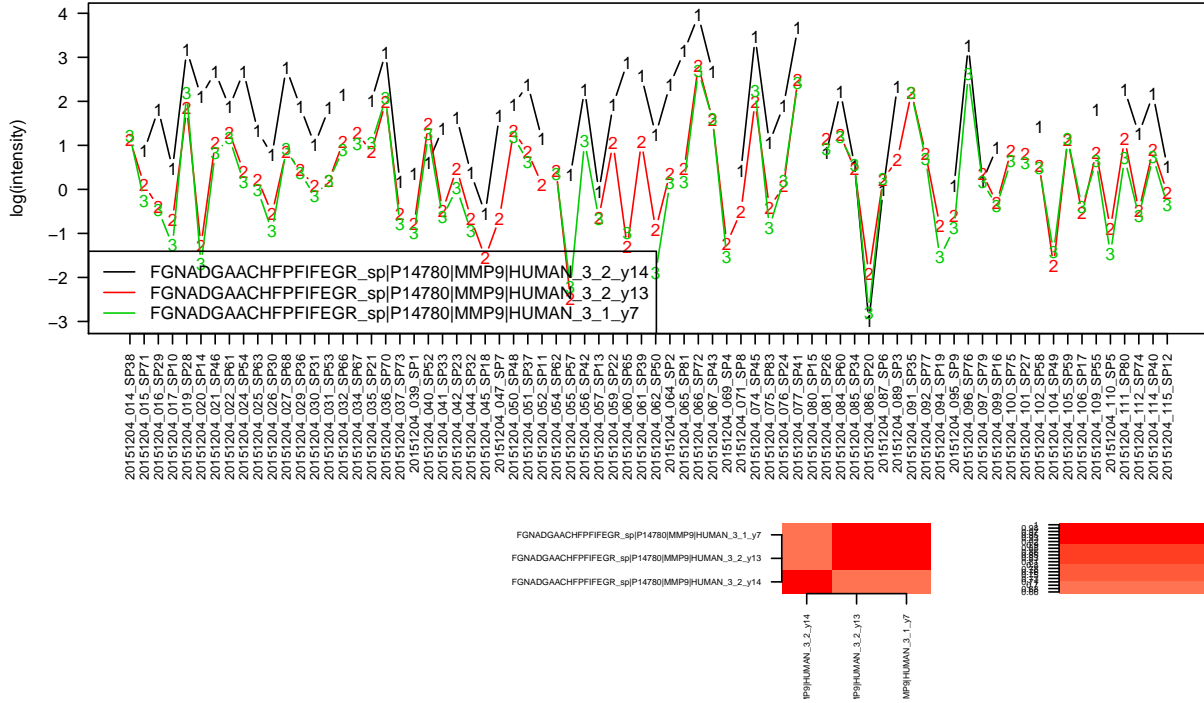

sp|P14780|MMP9|HUMAN\_QLAEEYLYR\_2

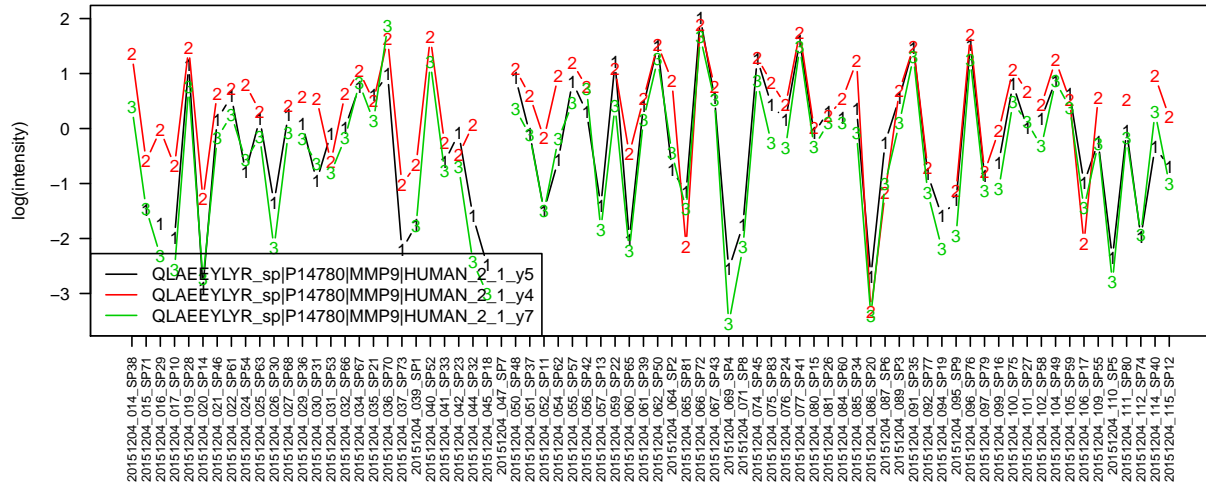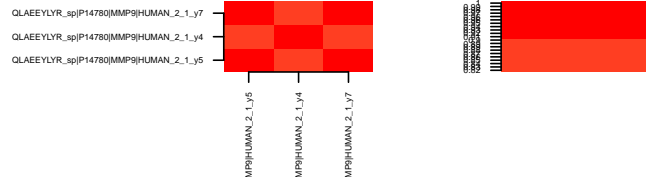

sp|P14780|MMP9|HUMAN\_QSTLVLPFGDLR\_2

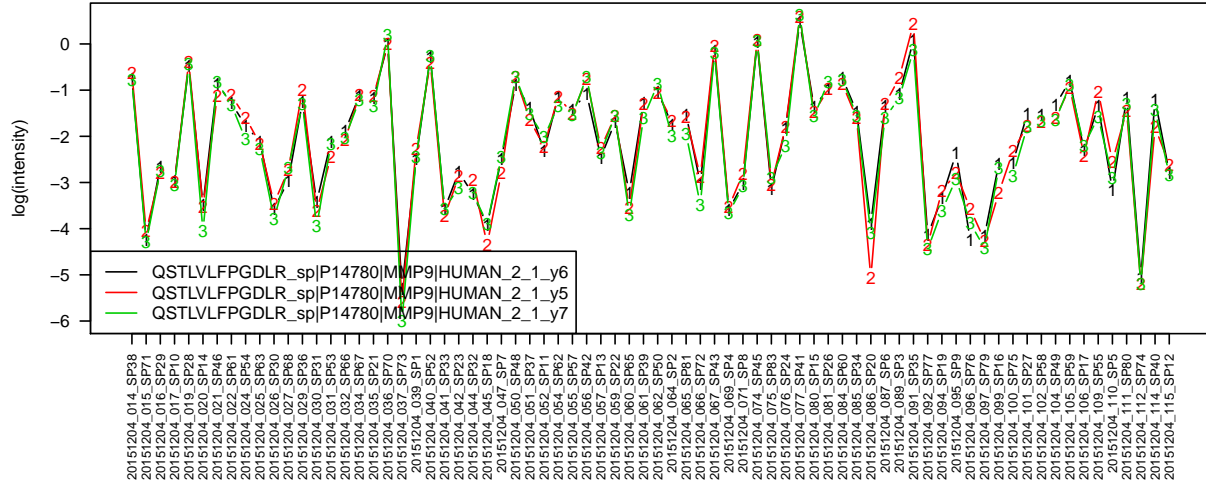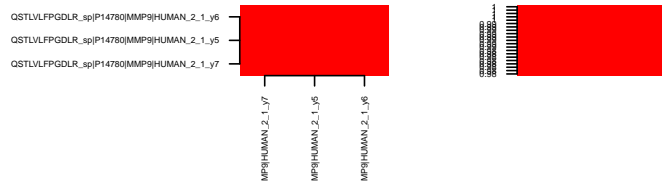

sp|P22894|MMP8|HUMAN\_SIGAFPGIESK\_2

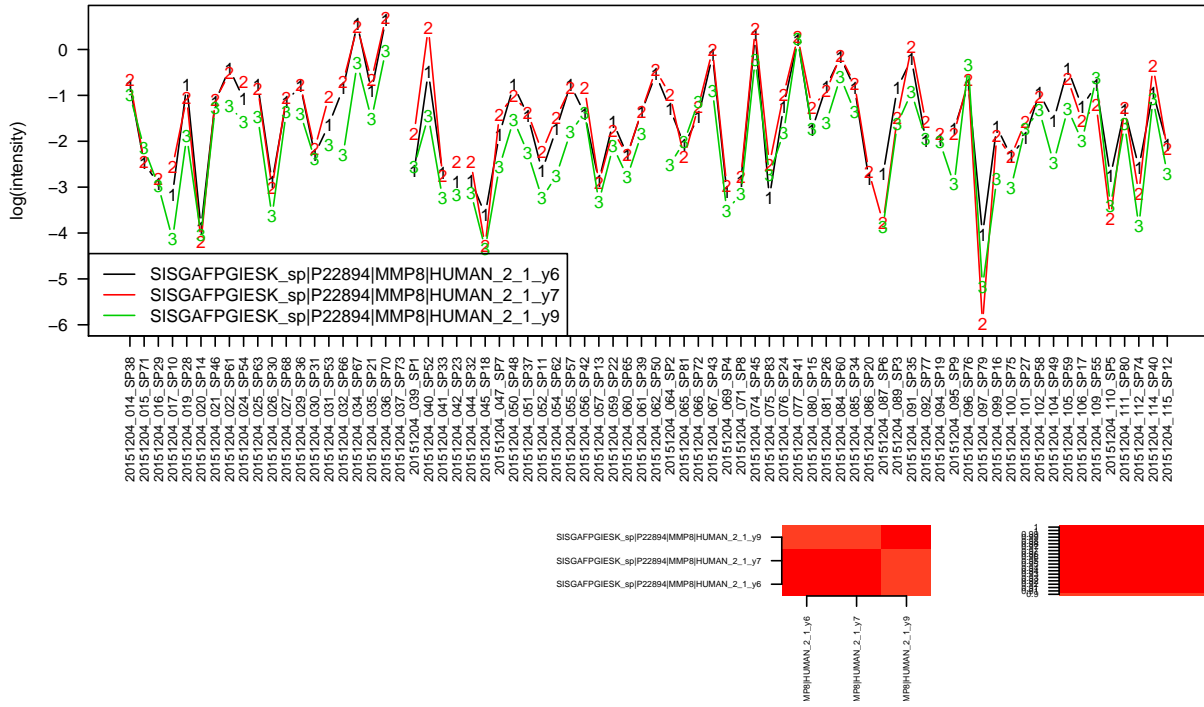

sp|P22894|MMP8|HUMAN\_YYAFDLIAQR\_2

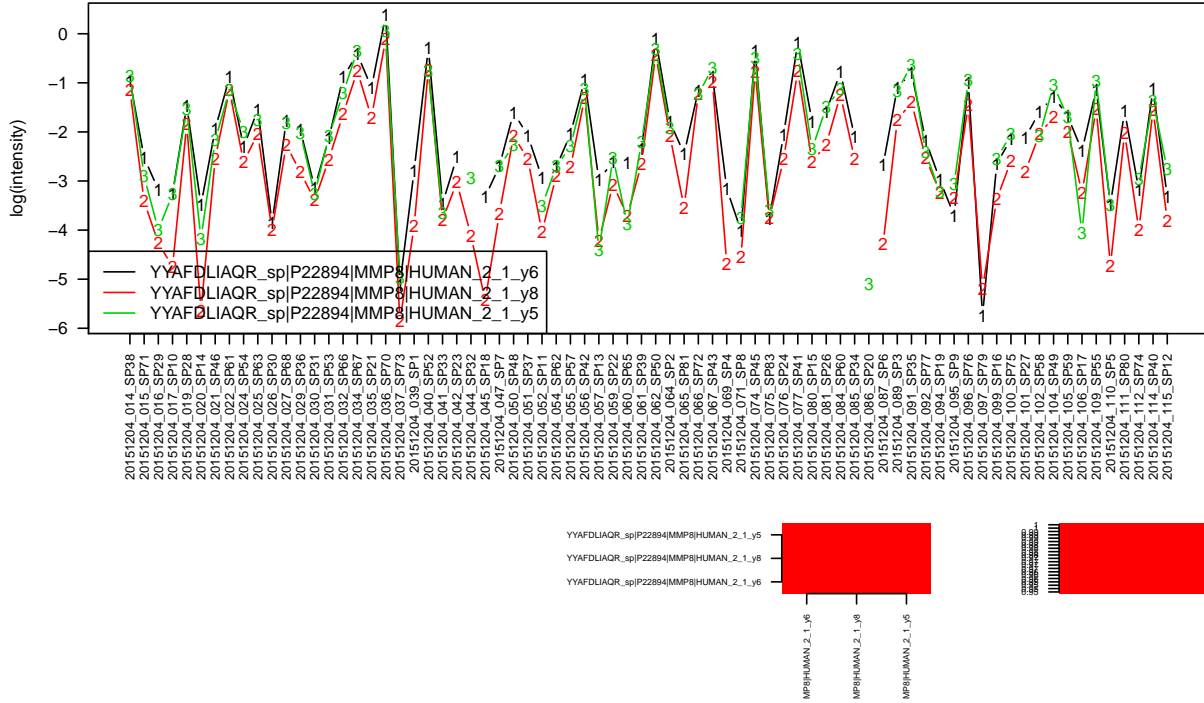

sp|P23280|CAH6|HUMAN\_HVIEIHVHYNSK\_3

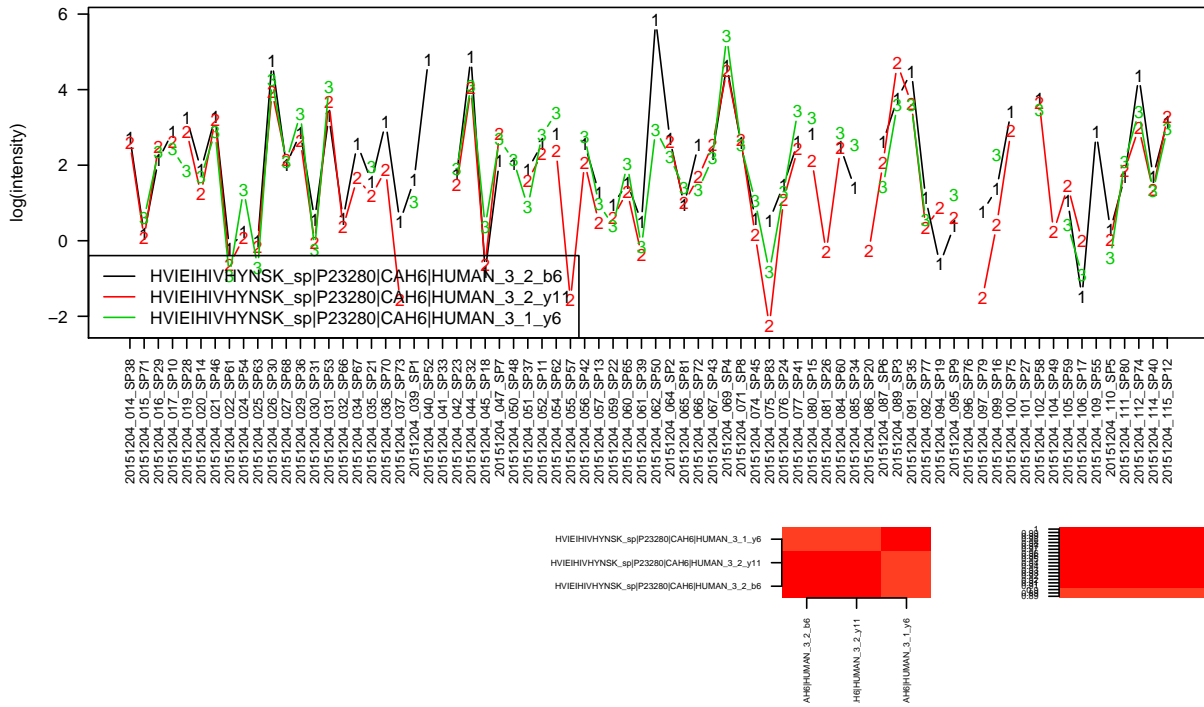

sp|P23280|CAH6|HUMAN\_LENSSLDDHR\_2

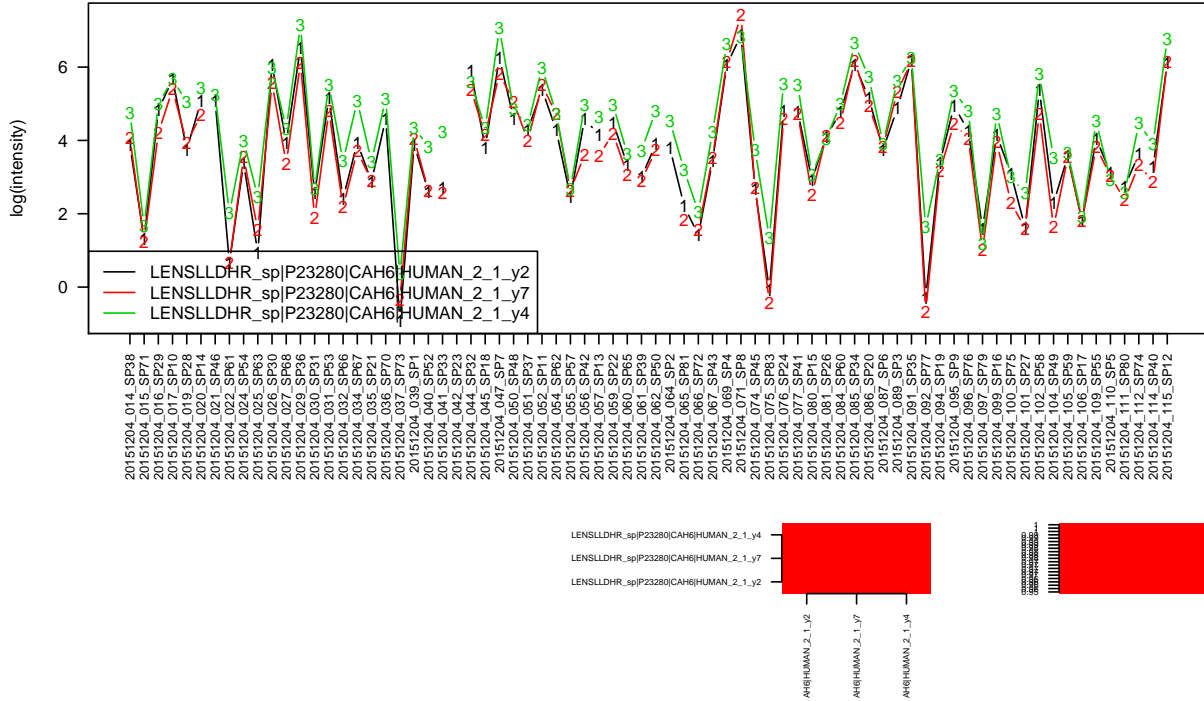

sp|P23280|CAH6|HUMAN\_NYPENTYYSNFISHLANIK\_2

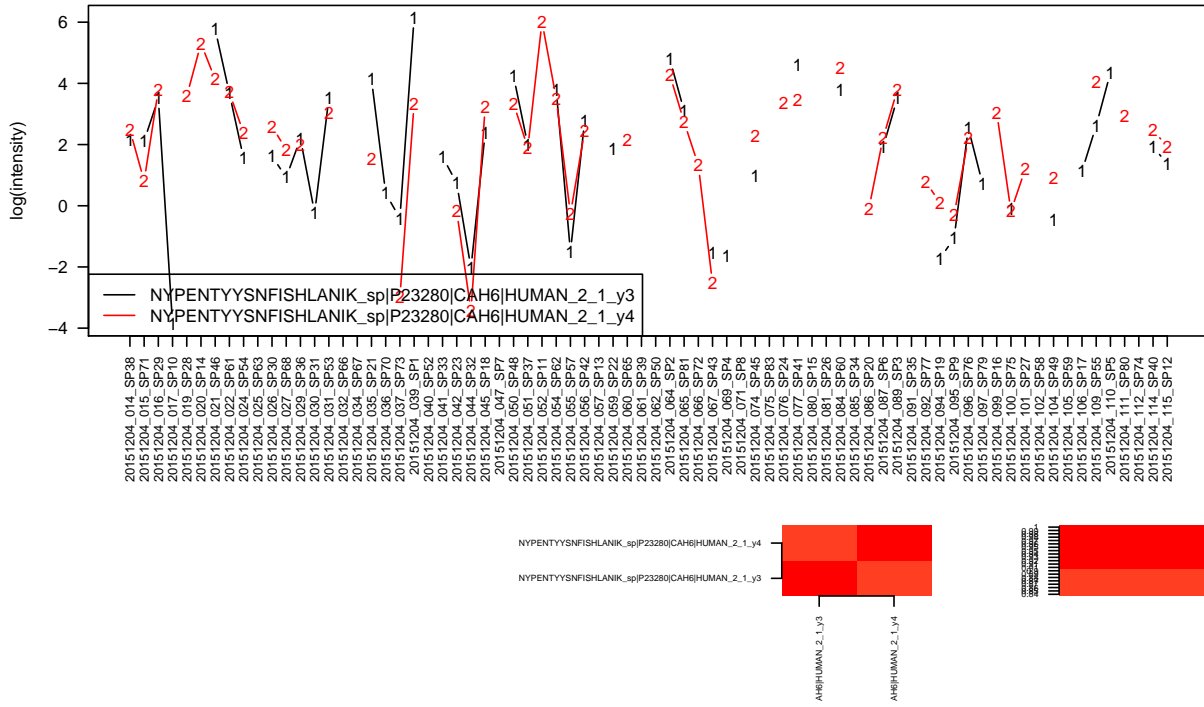

sp|P29508-1|SPB3|HUMAN\_QYTSFHFASLEDVQAK\_3

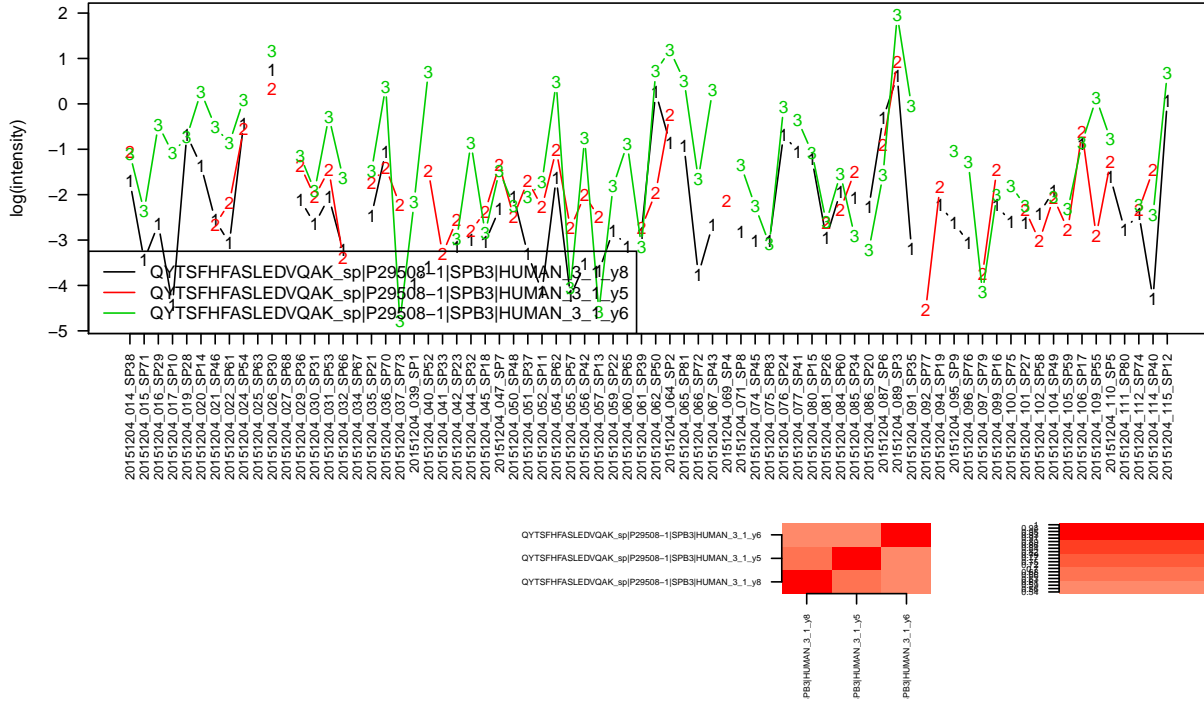

sp|P29508-1|SPB3|HUMAN\_VLHFDQVTENTTGK\_3

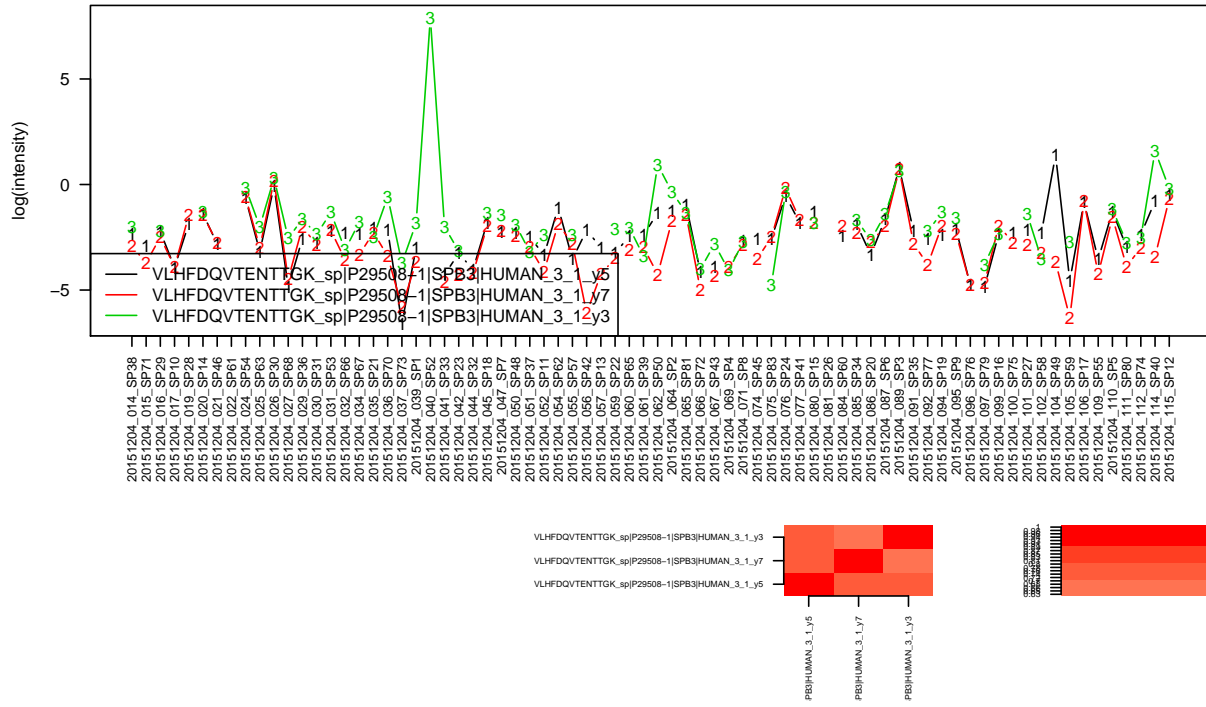

sp|P31947-1|I433S|HUMAN\_GEELSCEER\_2

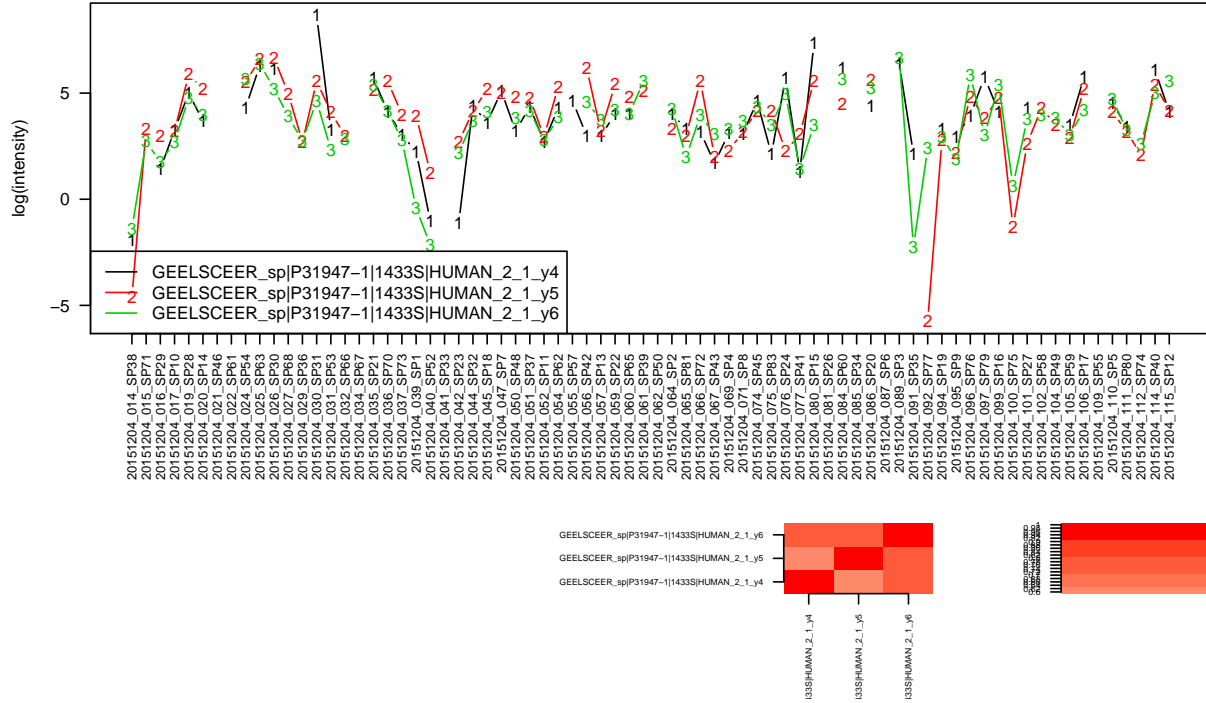

sp|P31947-1|1433S|HUMAN\_VLSSIEQK\_2

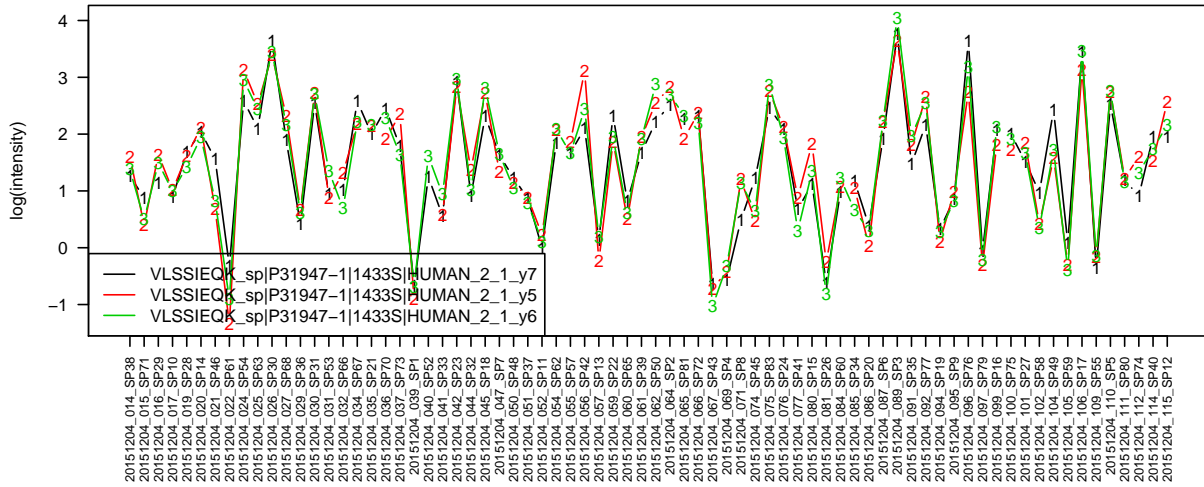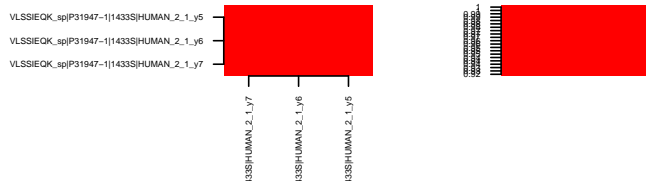

sp|P31947-1|1433S|HUMAN\_YLAEVATGDDK\_2

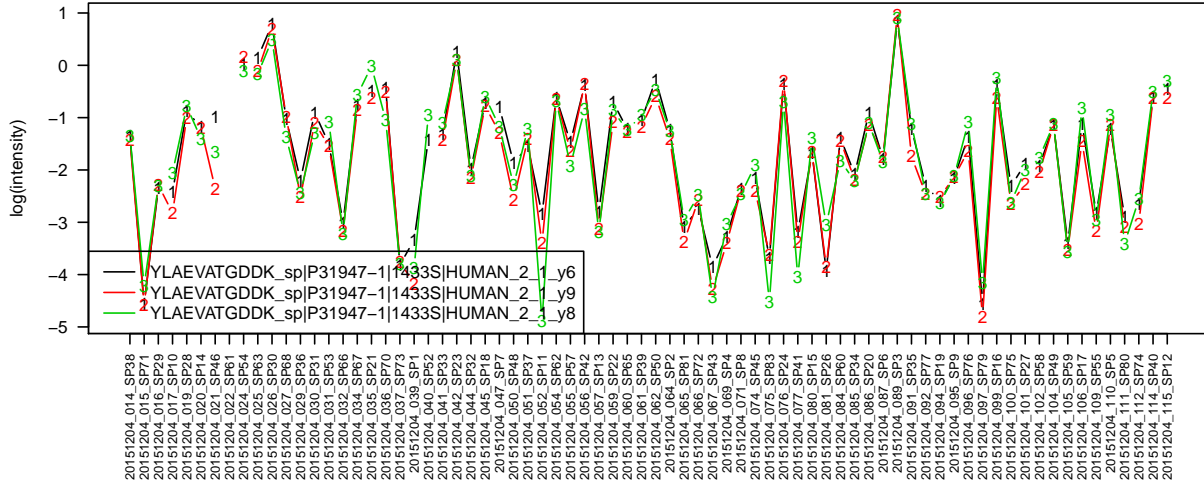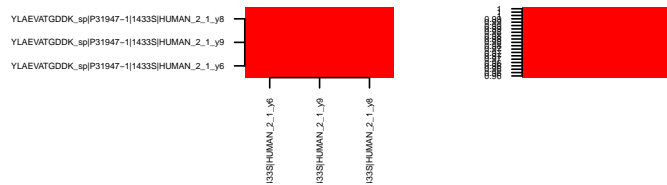

sp|P48595|SPB10|HUMAN\_AVGLQLYYK\_2

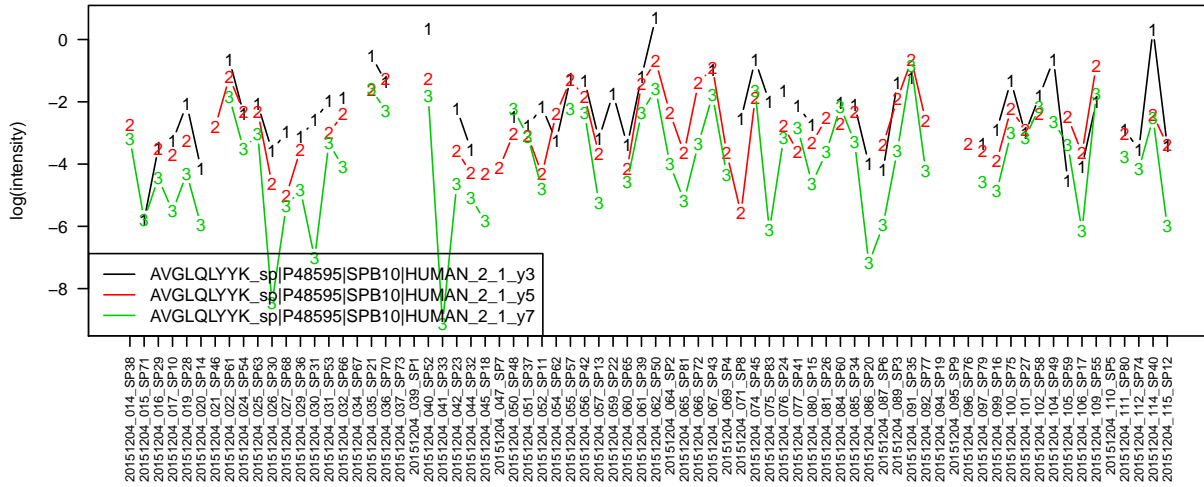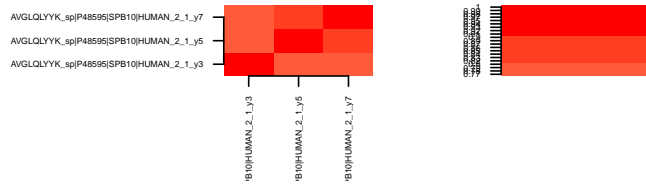

sp|P48595|SPB10|HUMAN\_IQNLLPDDSDSTTR\_2

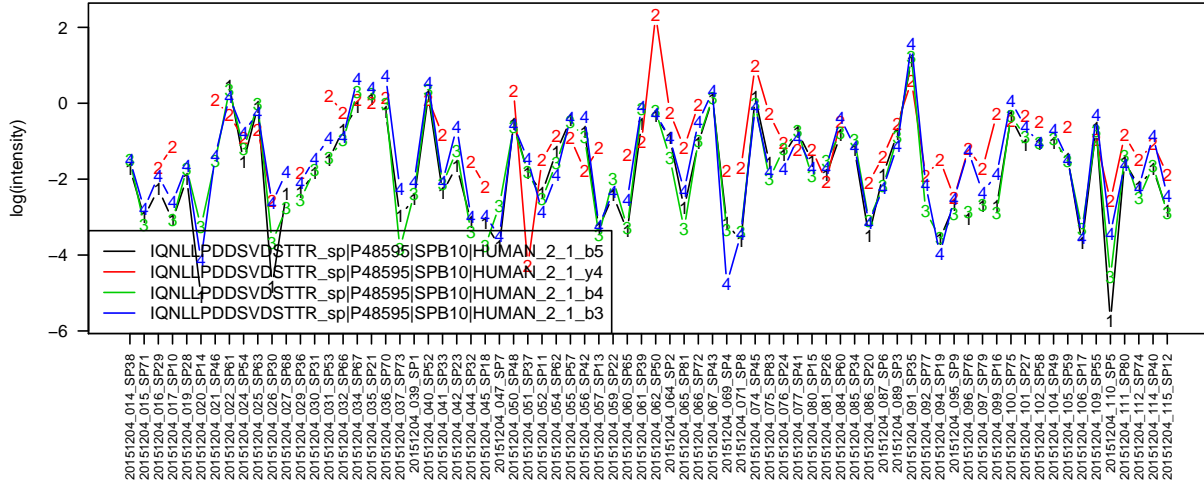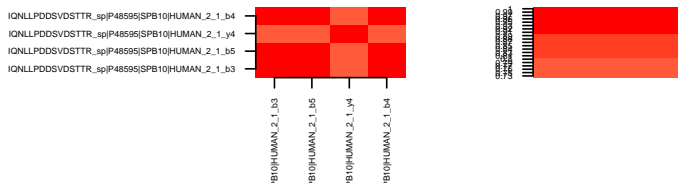



sp|P48595|SPB10|HUMAN\_NLFLSNVFHK\_2

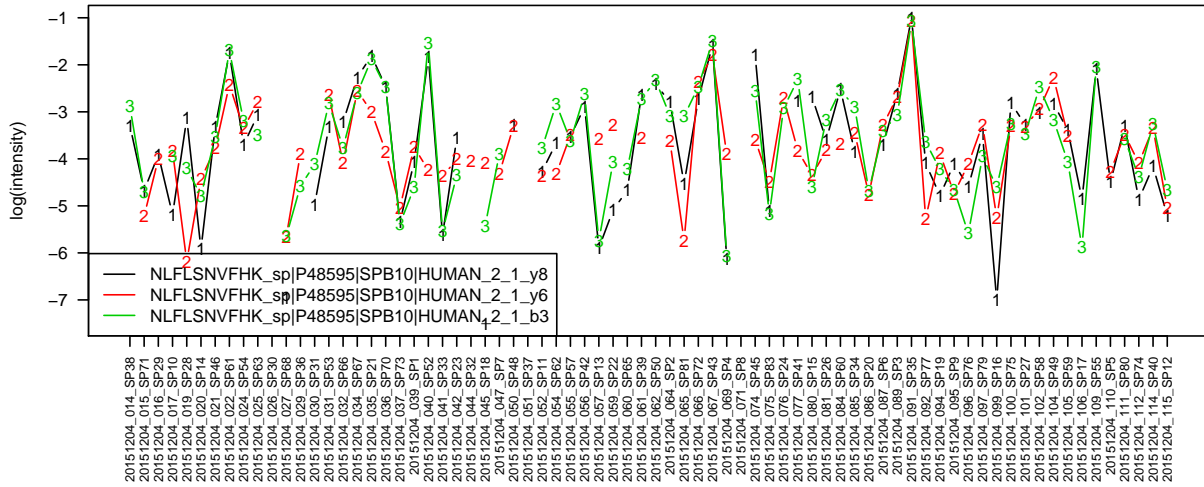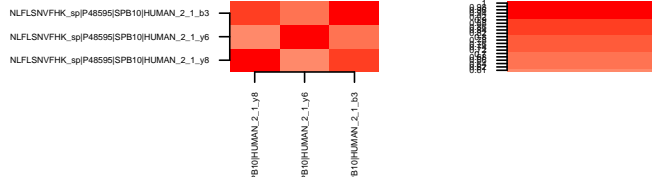

sp|P50552|VASP|HUMAN\_YNQATPNFHQWR\_3

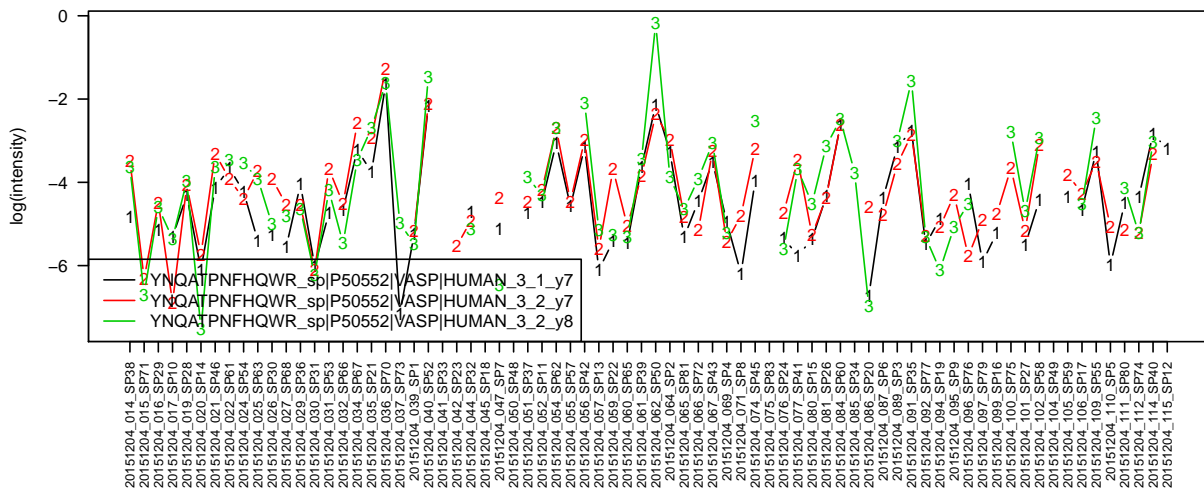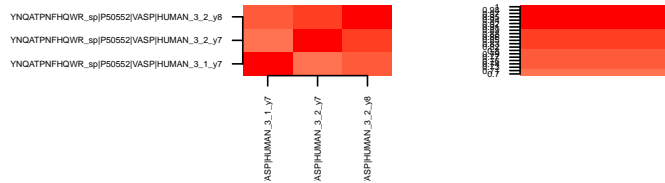

sp|P52566|GDIR2|HUMAN\_APEPHVEEDDDDELDSK\_3

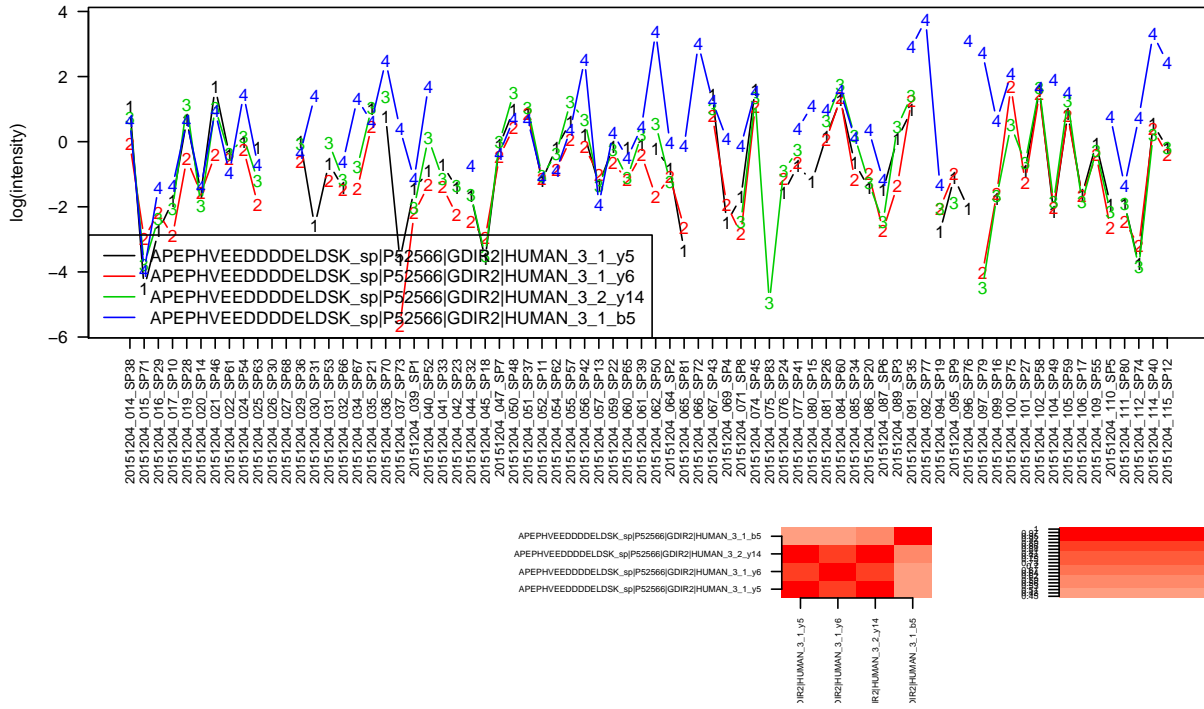

sp|P52566|GDIR2|HUMAN\_APNVVTR\_2

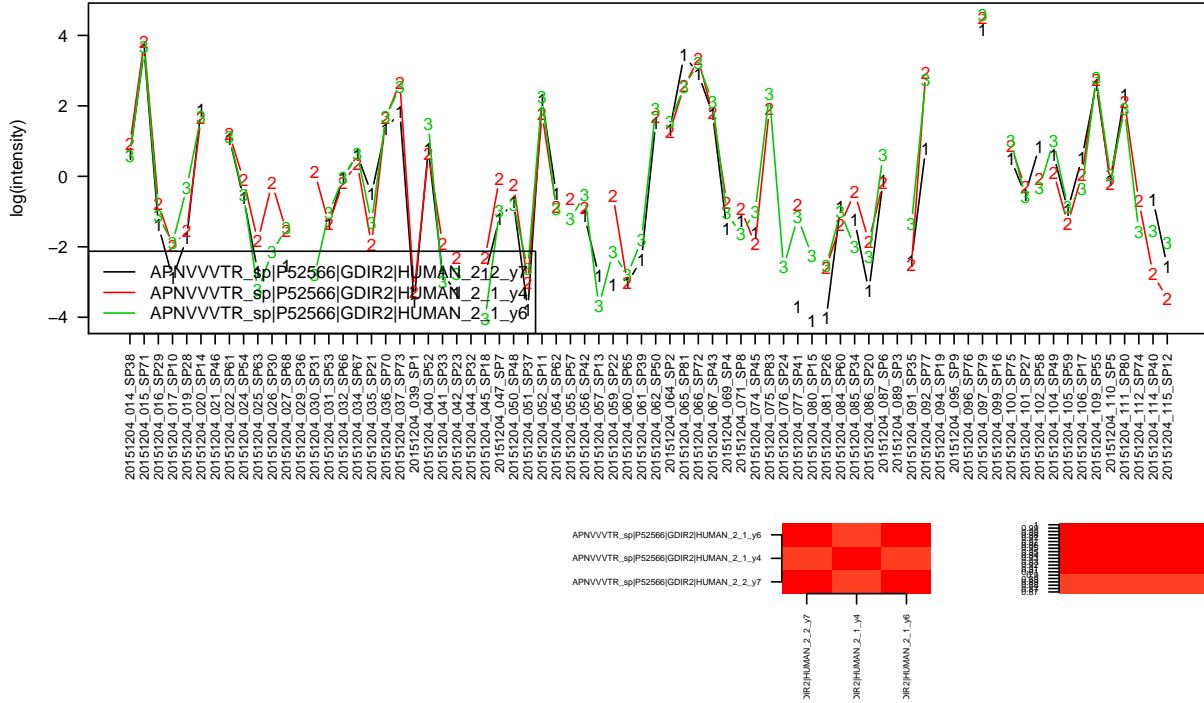

sp|P52566|GDIR2|HUMAN\_TLLGDPVVTDPK\_2

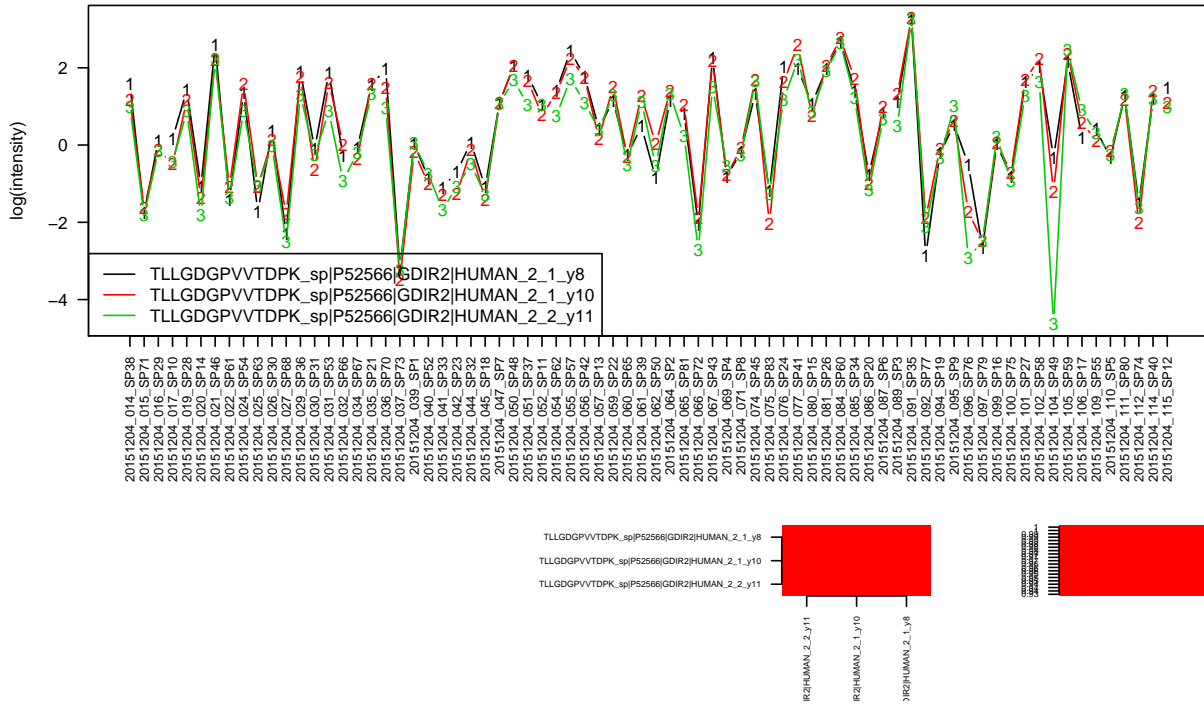

sp|P54108|CRIS3|HUMAN\_DPAFTALLTQTQVQR\_2

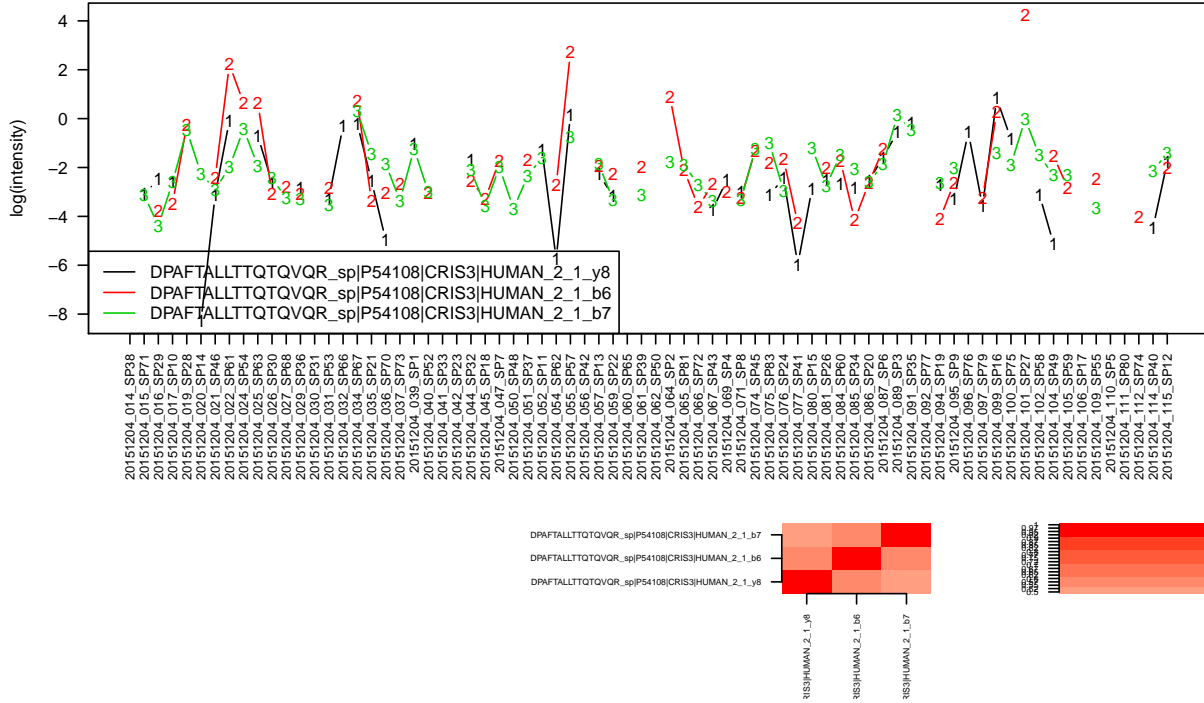

sp|P54108|CRIS3|HUMAN\_WANQCNYR\_2

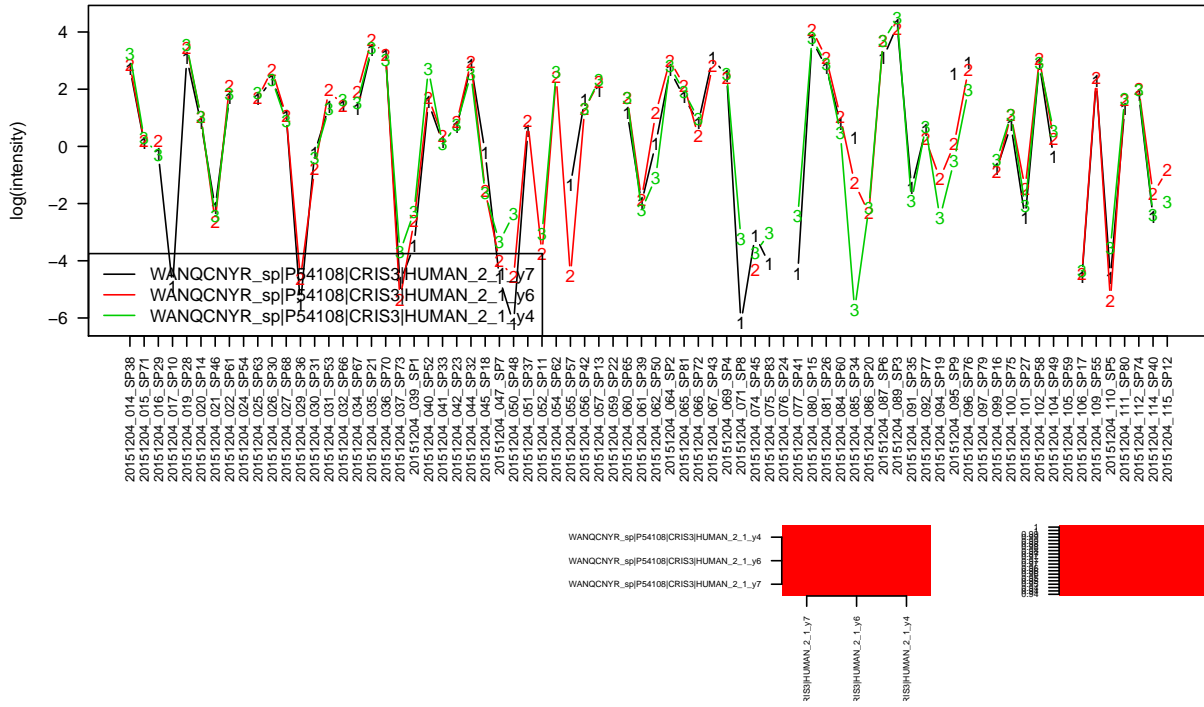

sp|P54108|CRIS3|HUMAN\_YYVCQYCPAGNWANR\_2

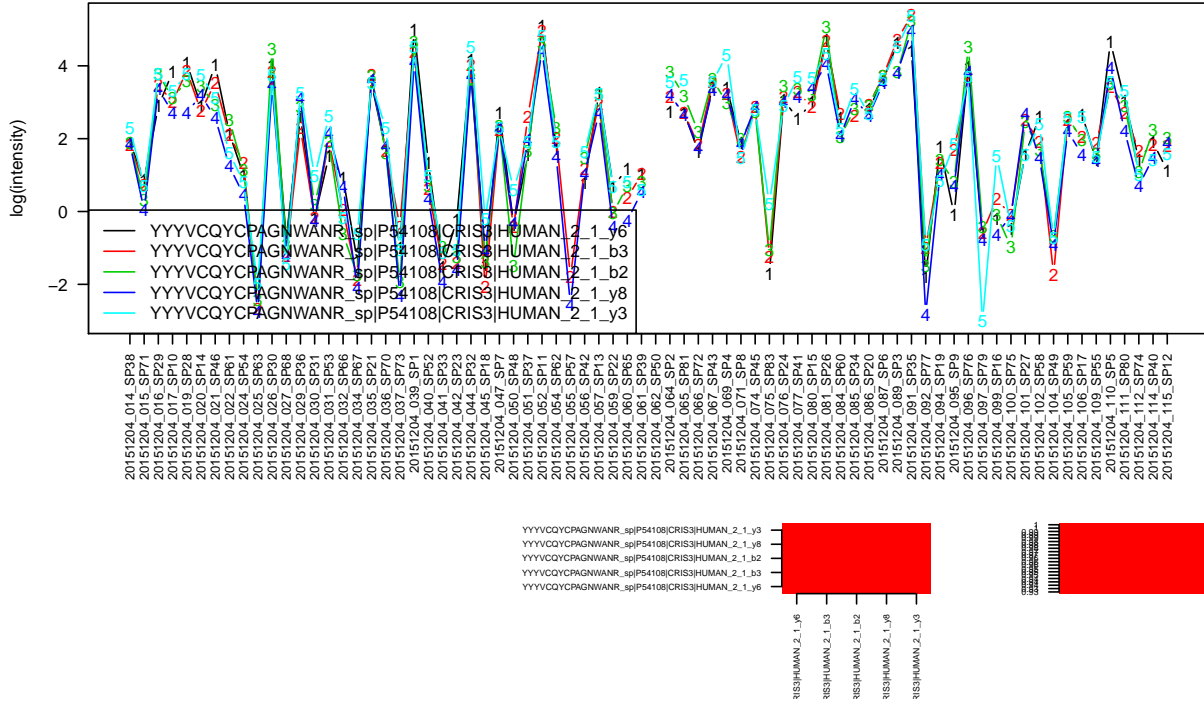

sp|P68032|ACTC|HUMAN\_AGFAGDDAPR\_2

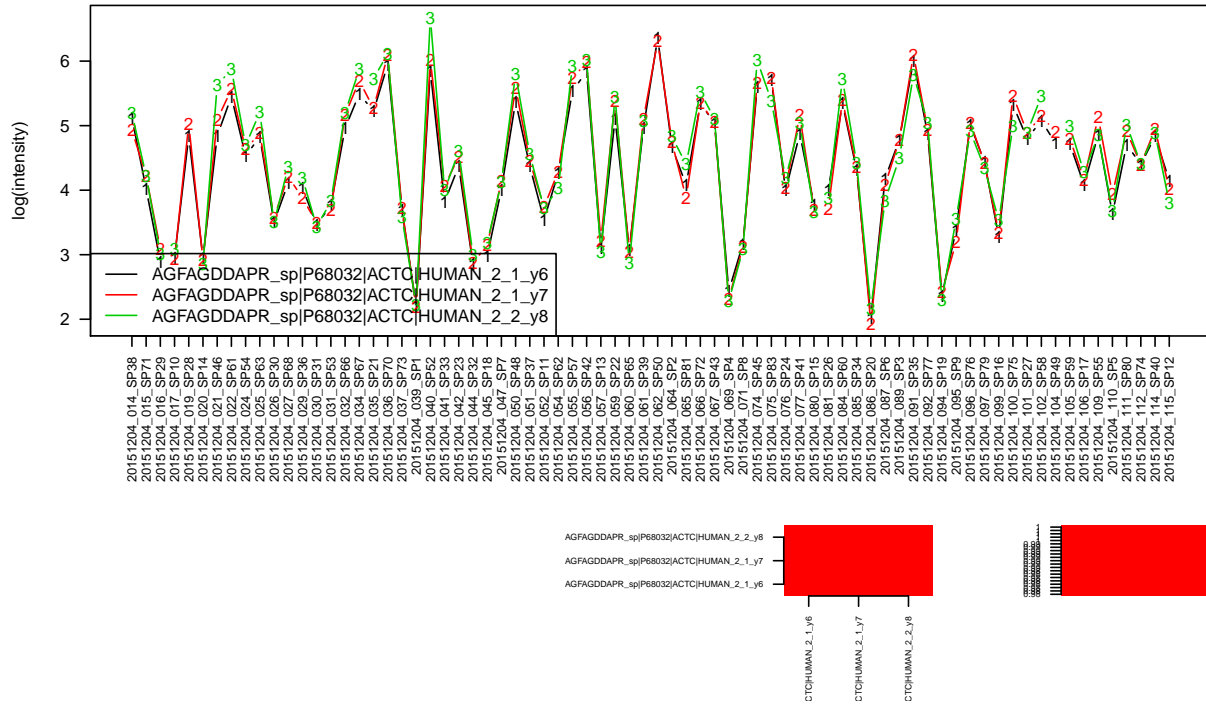

sp|P68032|ACTC|HUMAN\_AVFPSIVGRPR\_2

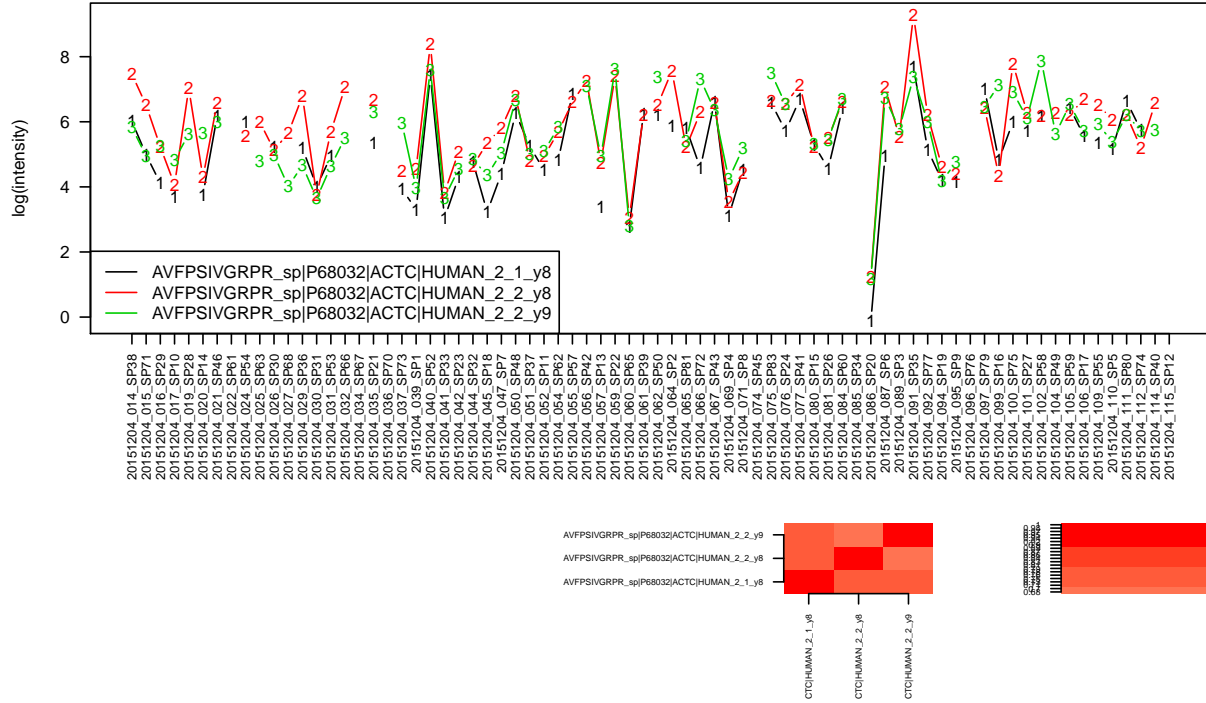

sp|P68032|ACTC|HUMAN\_SYELPDGQVITIGNER\_2

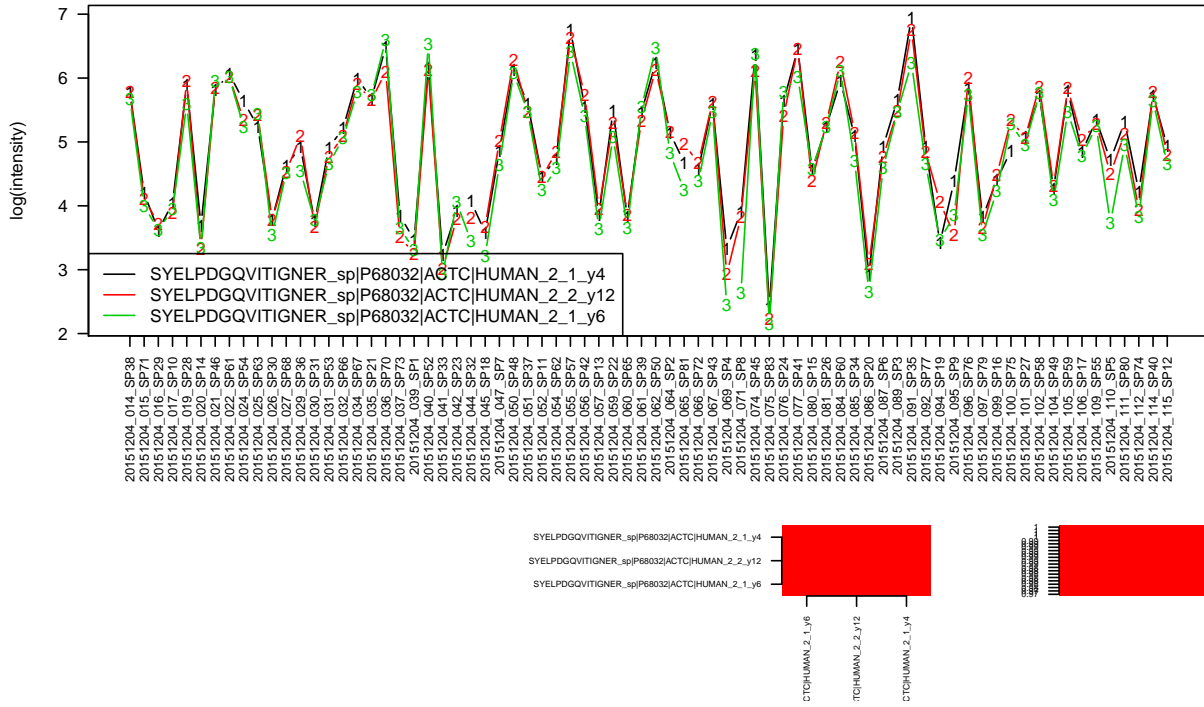

sp|P69905|HBA|HUMAN\_FLASVSTVLTSK\_2

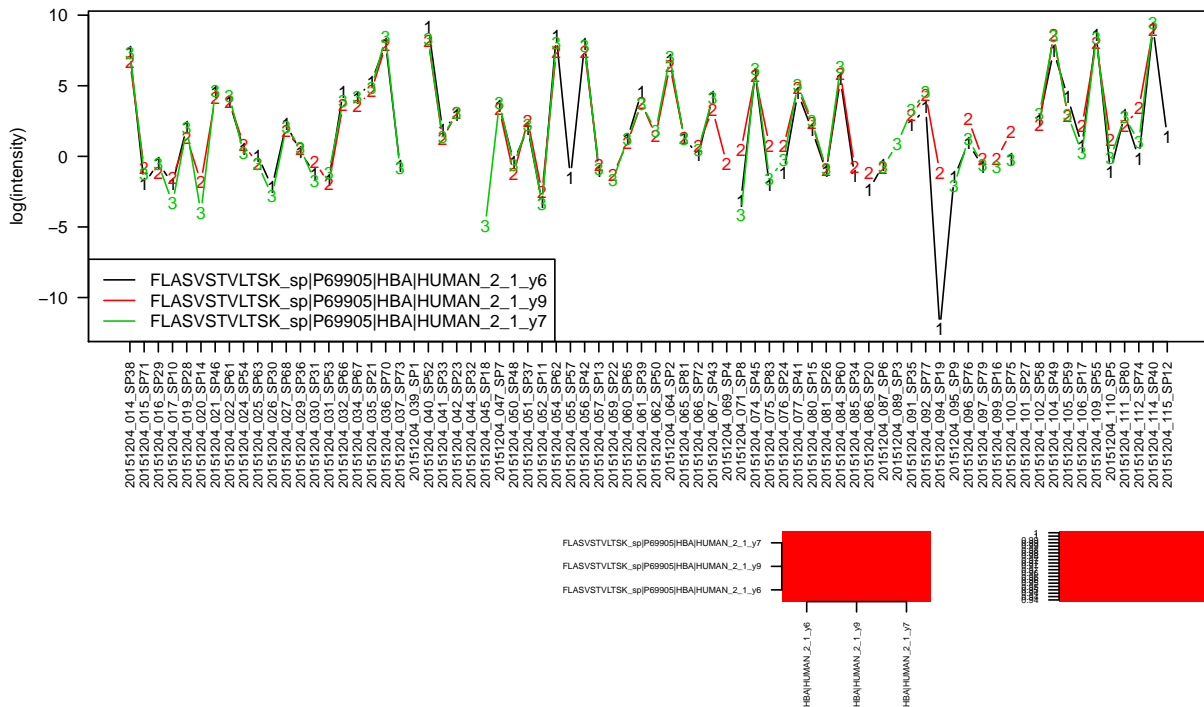

sp|P69905|HBA|HUMAN\_TYFPHDLSHGSAQVK\_2

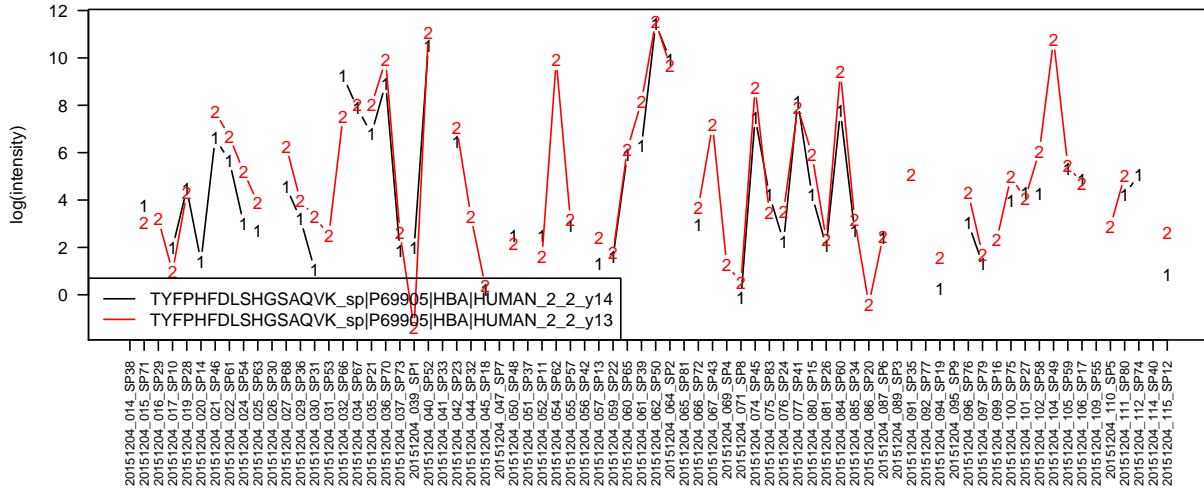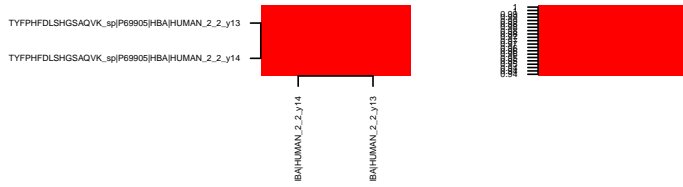

sp|P69905|HBA|HUMAN\_VGAHAGEYGAEALER\_3

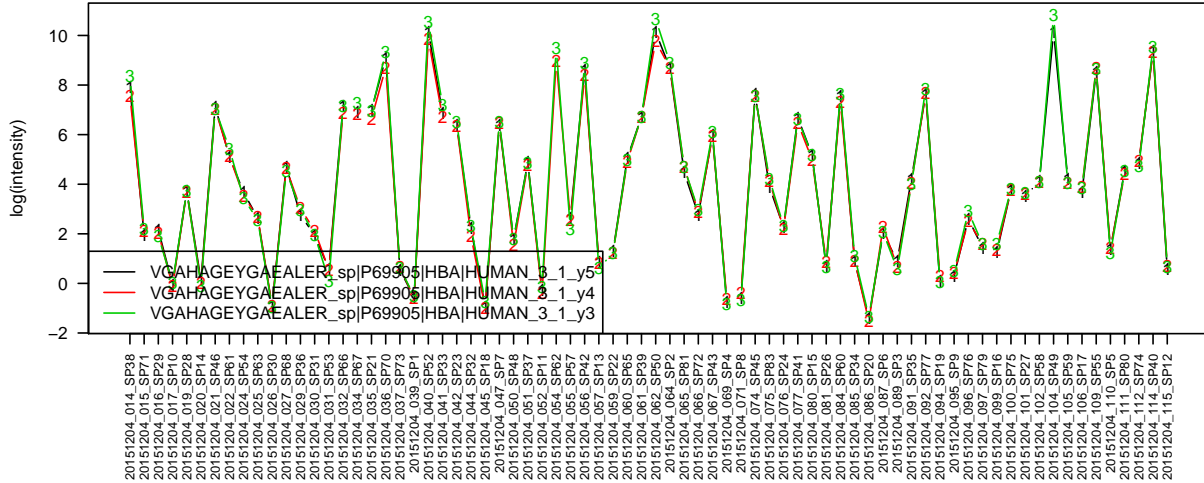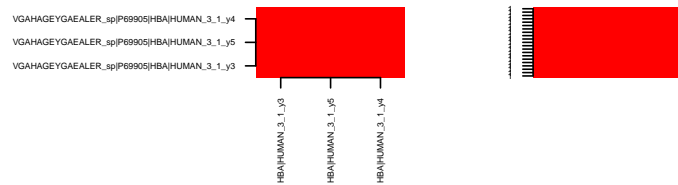

sp|P80723-1|BASP1|HUMAN\_ESEPQAAAEPAEAK\_2

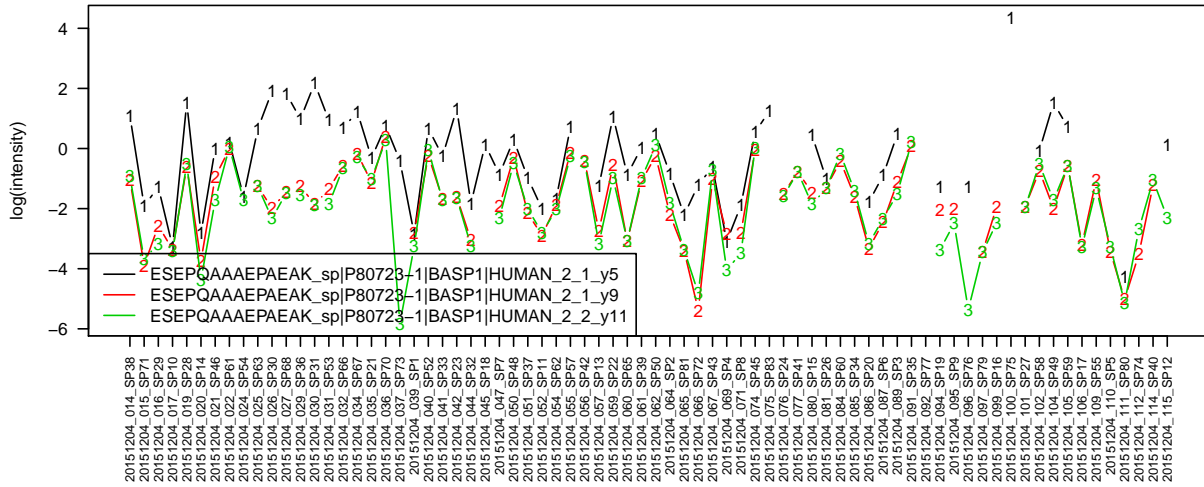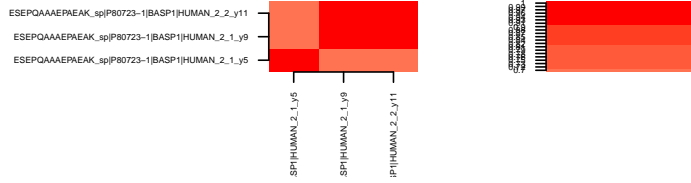

sp|P80723-1|BASP1|HUMAN\_ETPAATEAPSSSTPK\_2

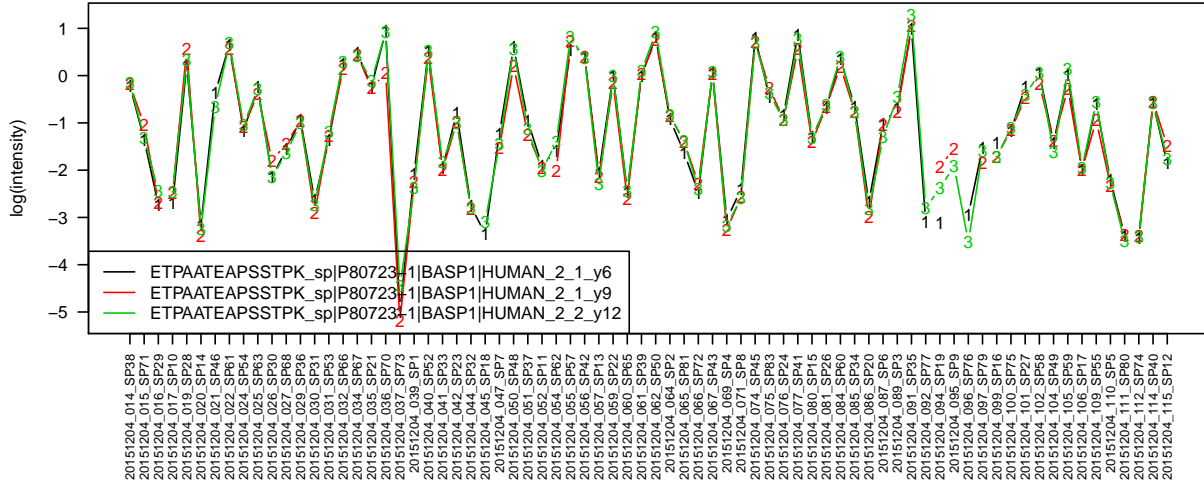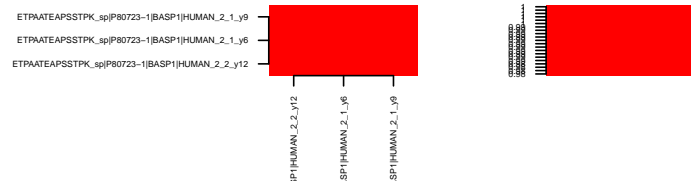



sp|Q14019|COTL1|HUMAN\_AAYNLVR\_2

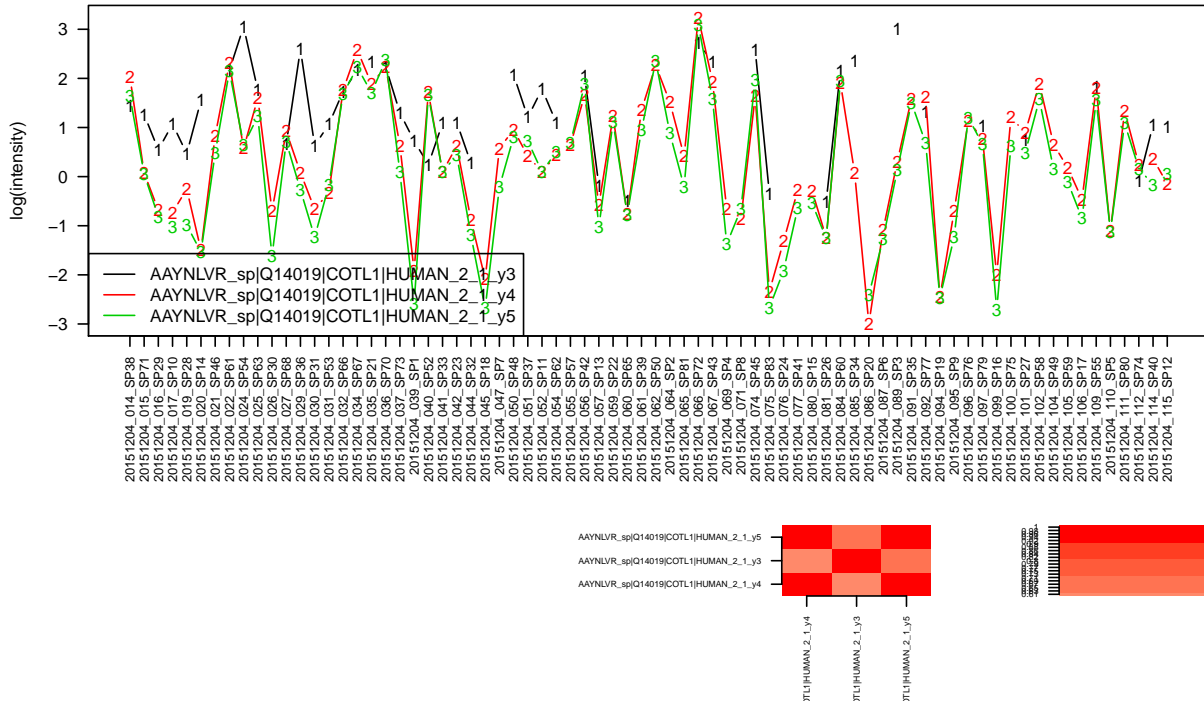

sp|Q14019|COTL1|HUMAN\_LFAFVR\_2

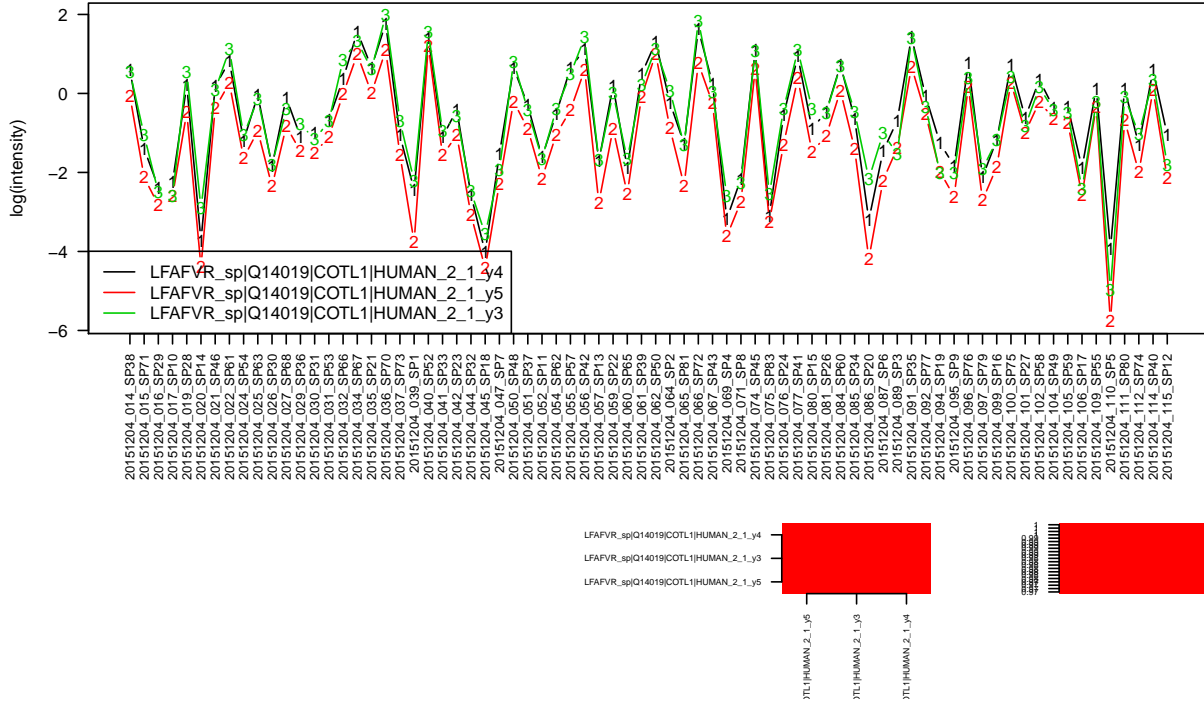

sp|Q16610-1|ECM1|HUMAN\_ELLALIQLER\_2

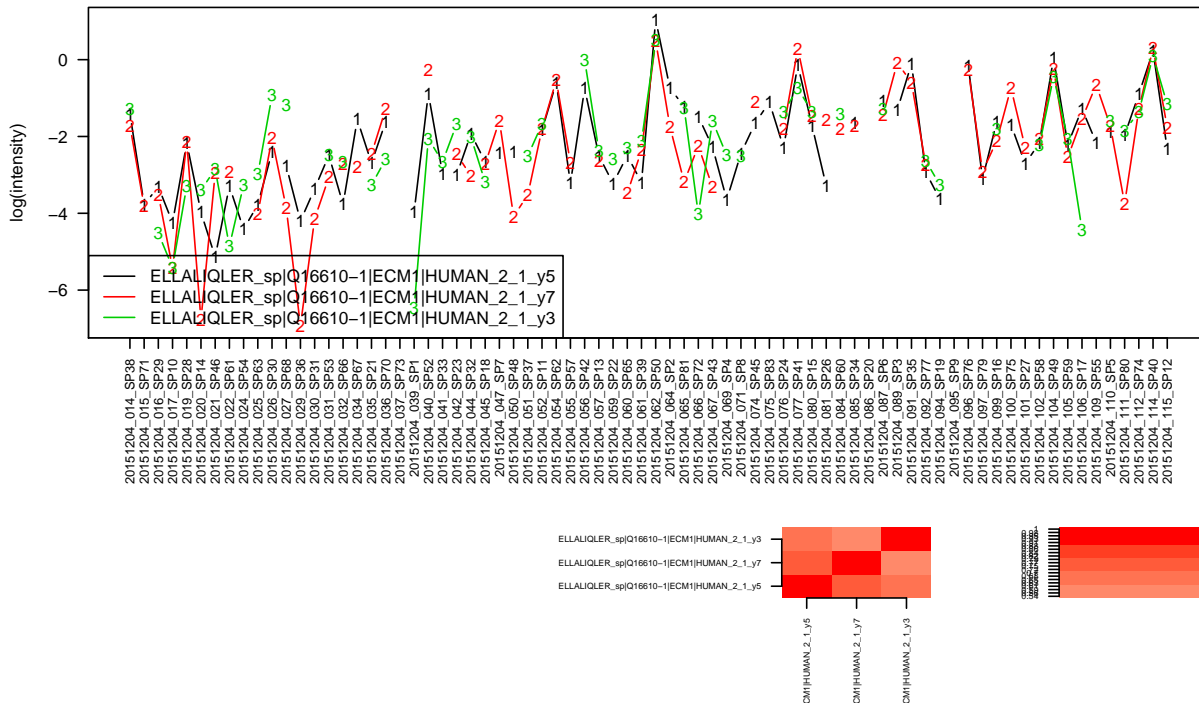

sp|Q16610-1|ECM1|HUMAN\_FCEAEFSVK\_2

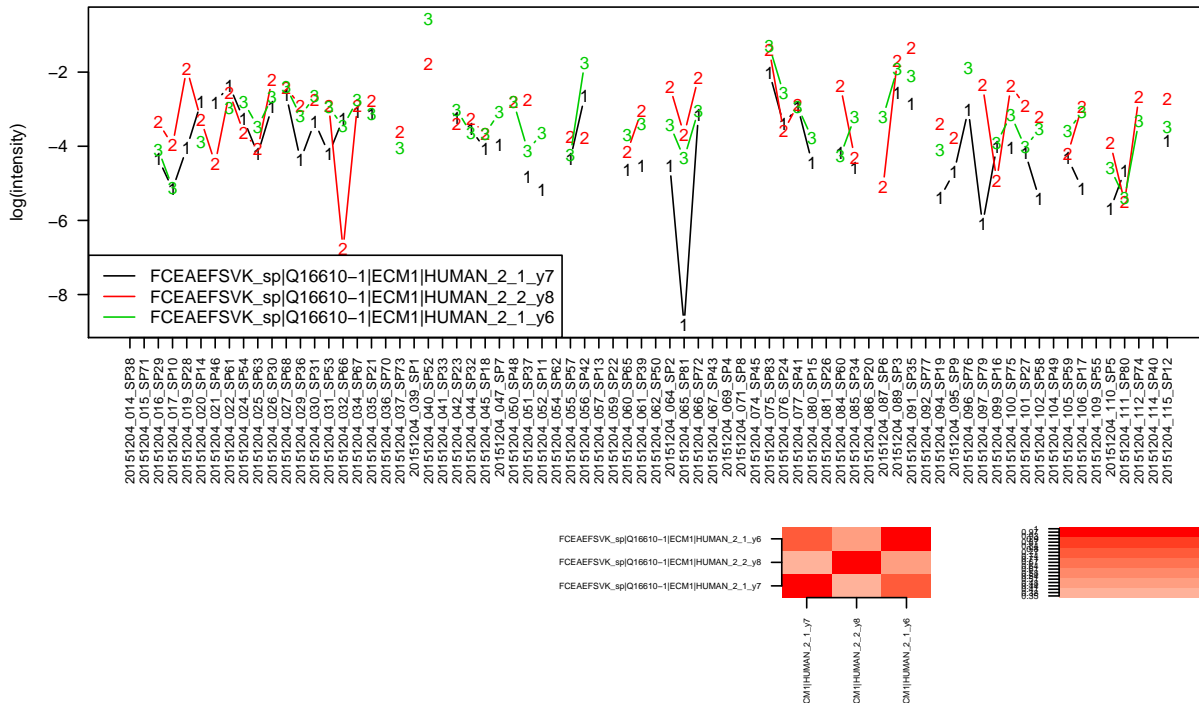

sp|Q16610-1|ECM1|HUMAN\_LTFINDLCGPR\_2

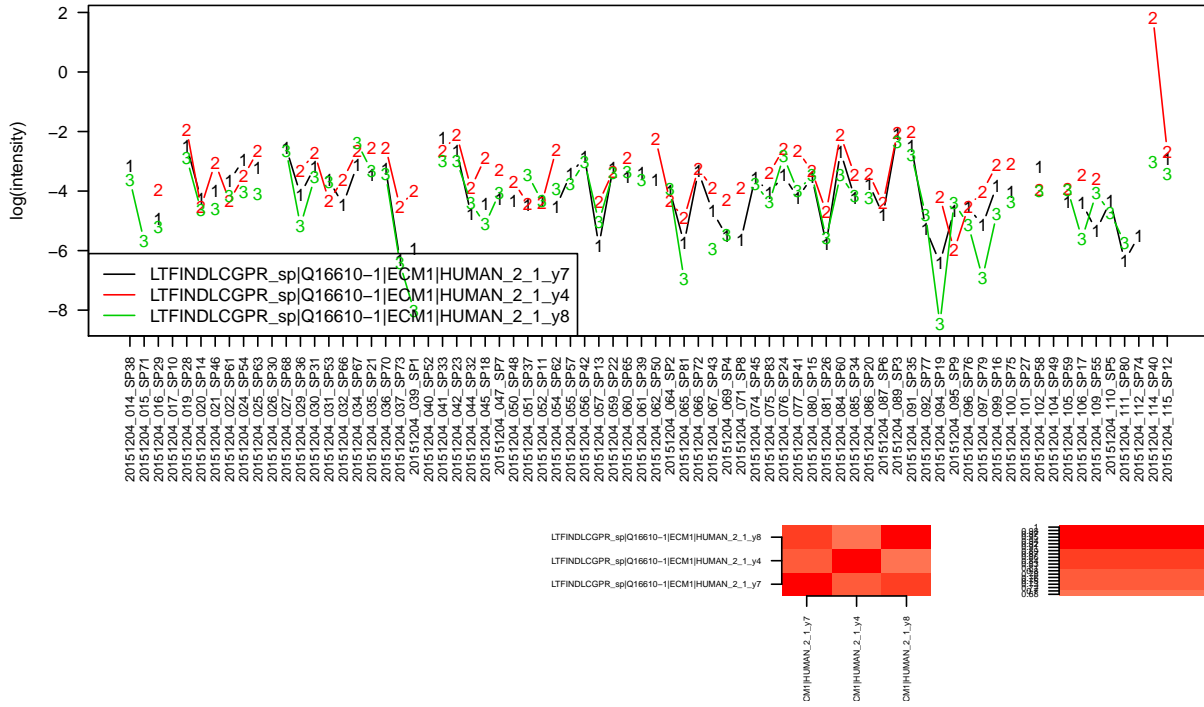

sp|Q9NP99-1|TREM1|HUMAN\_IILEDYHDHGLLR\_3

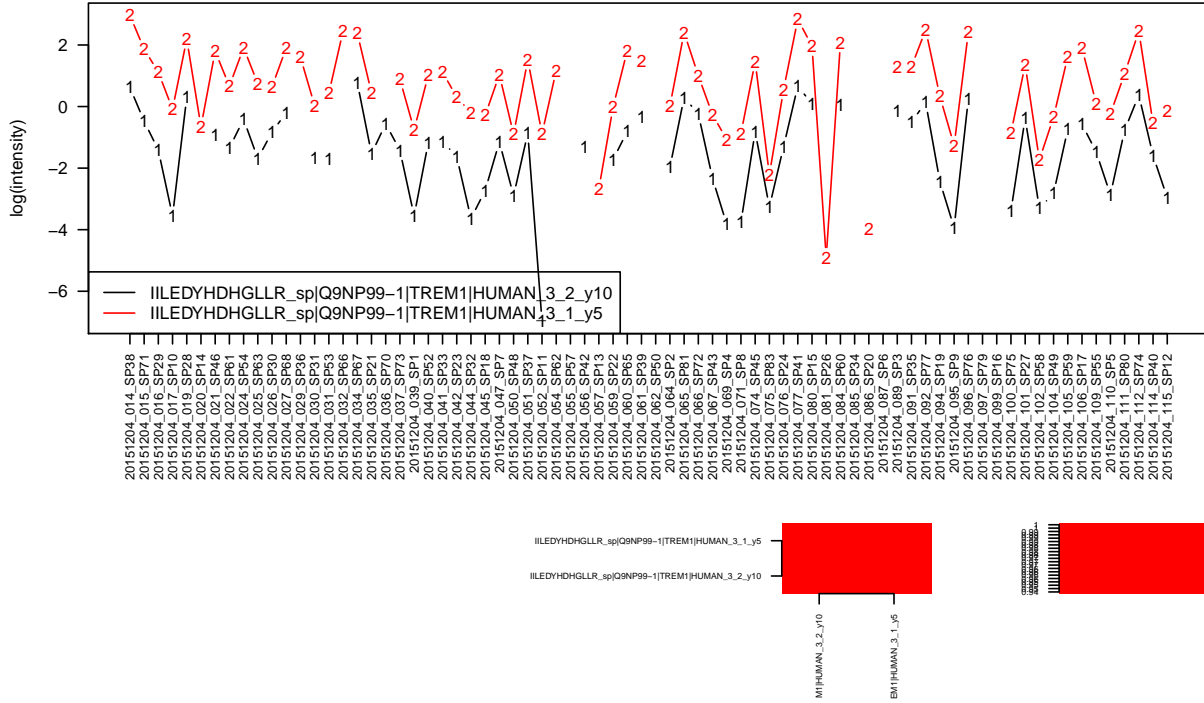

sp|Q9UGM3-1|DMBT1|HUMAN\_CVWDIEVQNNYR\_2

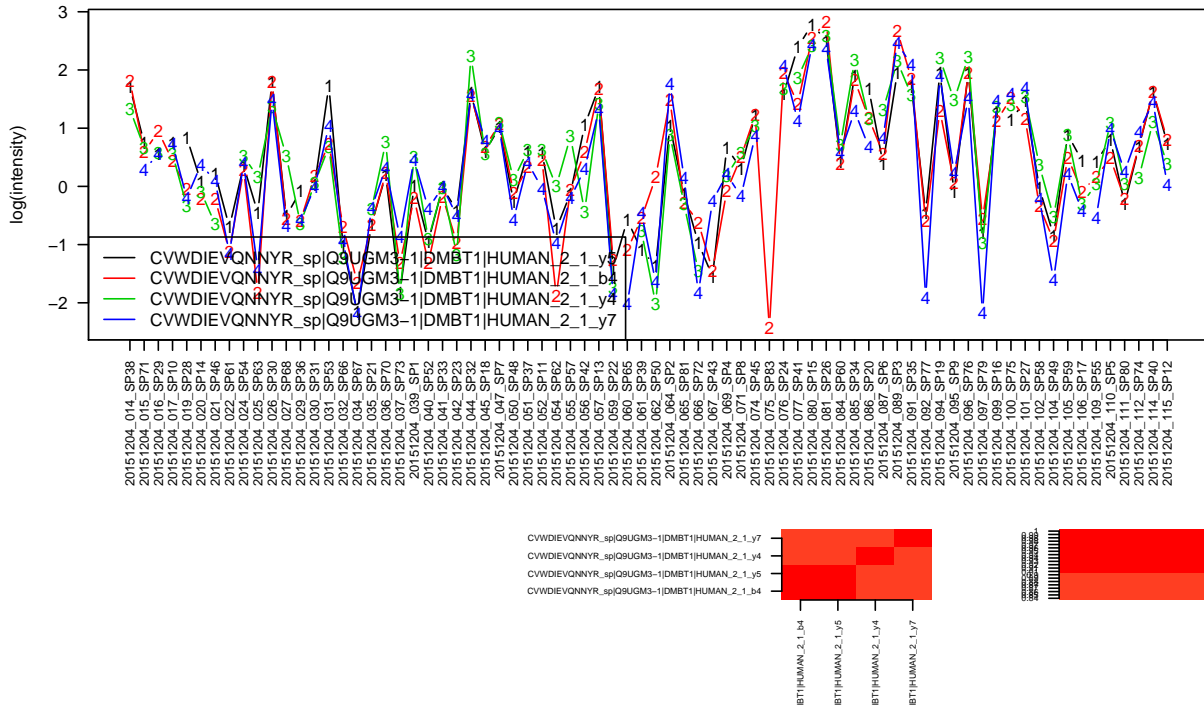

sp|Q9UGM3-1|DMBT1|HUMAN\_INLGFSNLK\_2

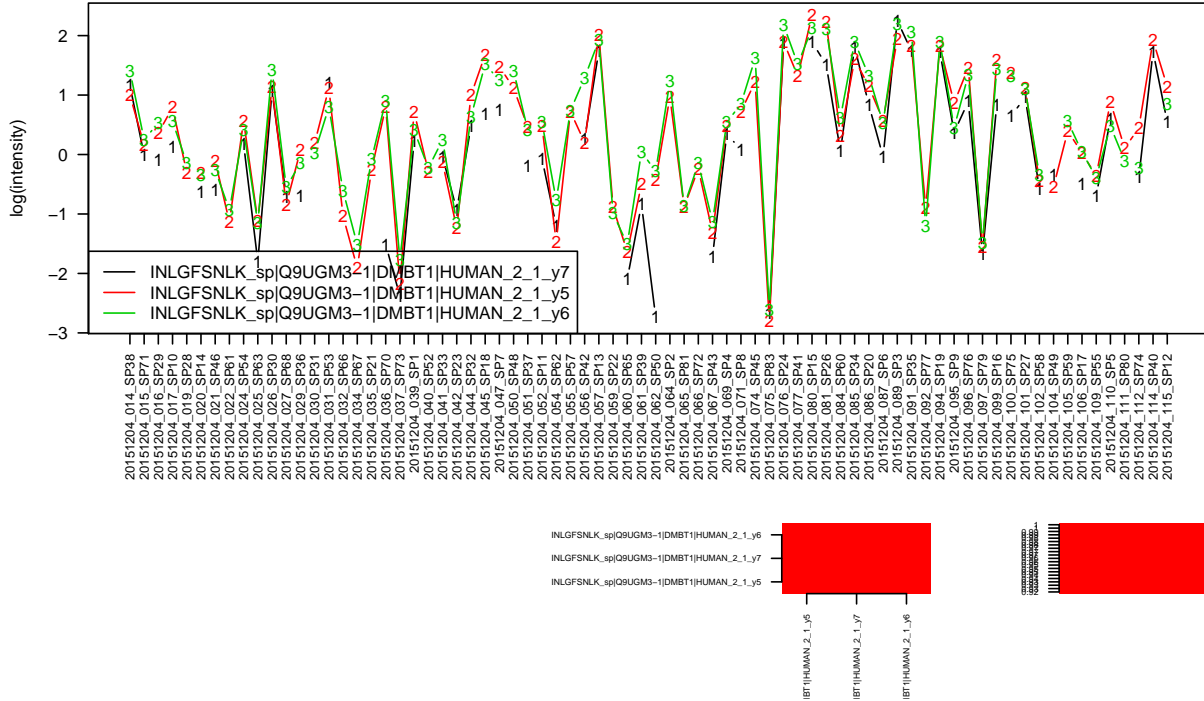

zz|ZZ|FGCZCont0031|\_DGAGDVAFIR\_2

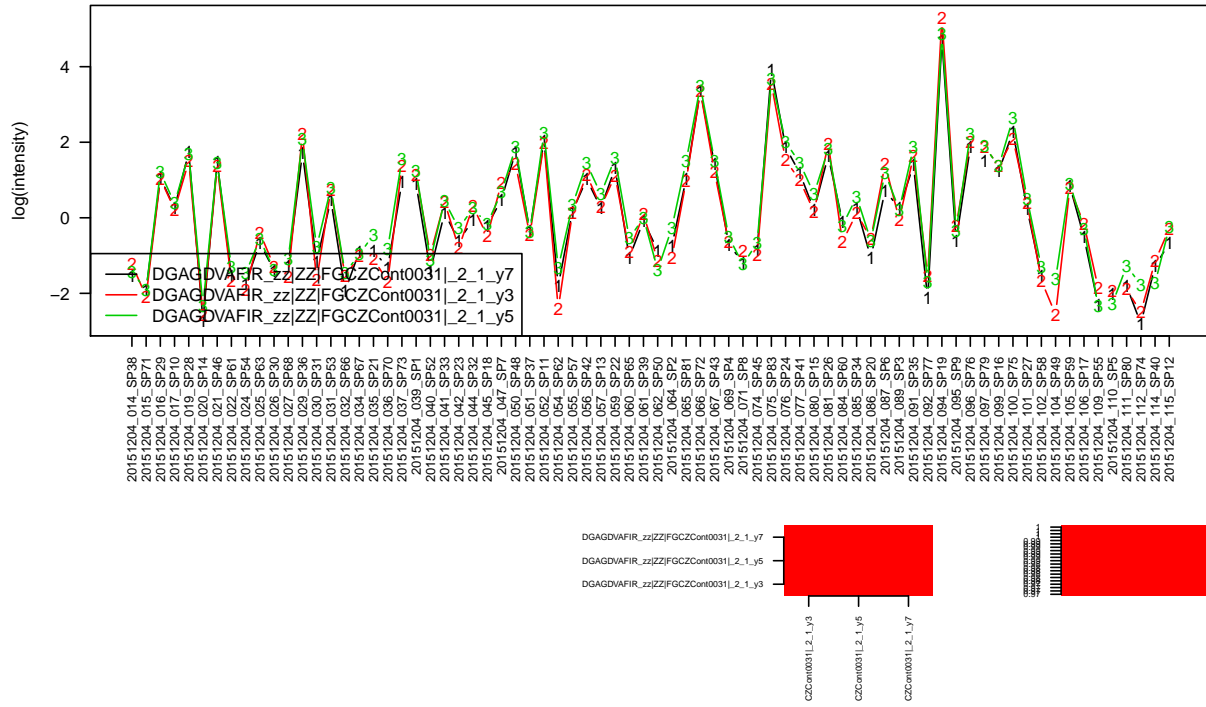

zz|ZZ|FGCZCont0031|\_NLLFNDNTECLAR\_2

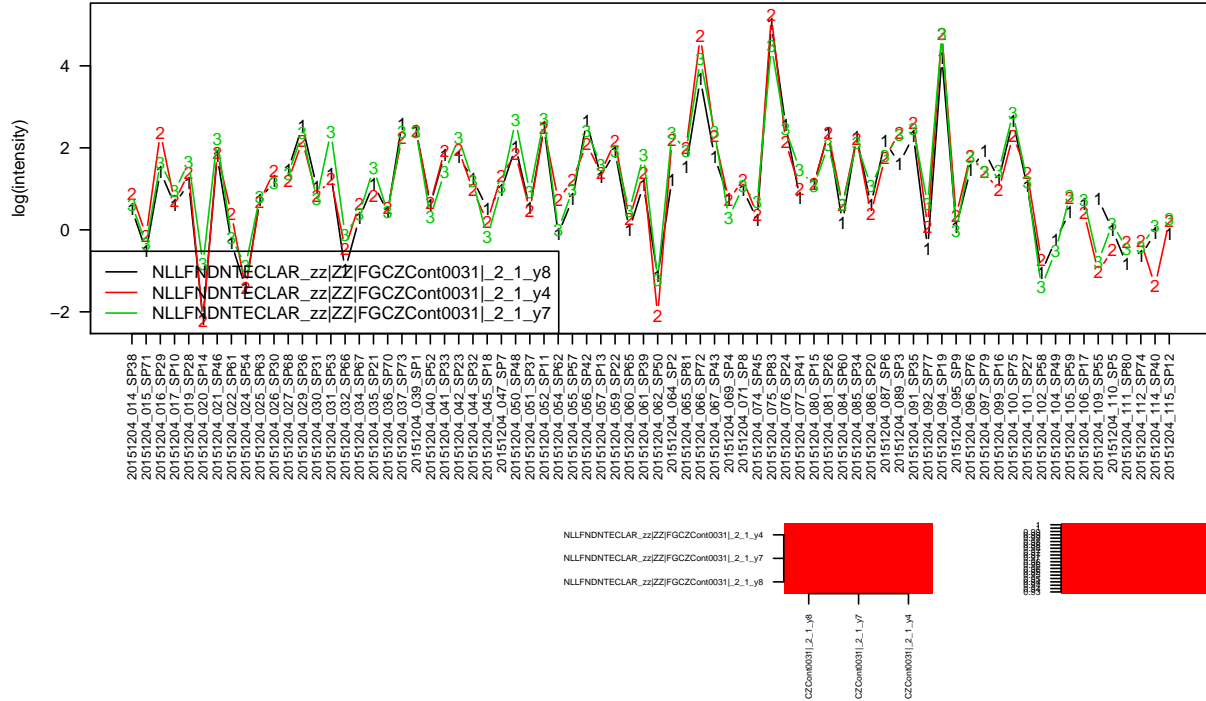

zz|ZZ|FGCZCont0031|\_SNLCALCIGDEQGENK\_2

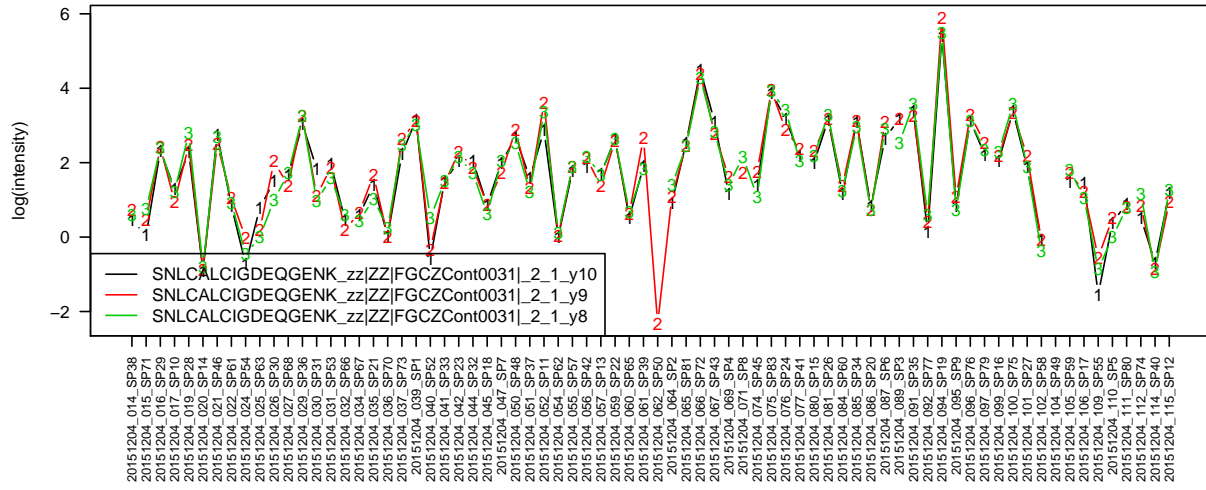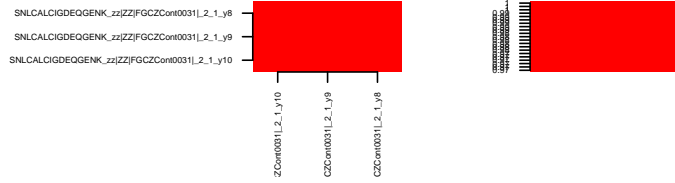

Supplement: supp_RA118.000718_136436_1_supp_105977_p67kwz.pdf [file supp_RA118.000718_136436_1_supp_105977_p67kwz.pdf]
