# Supplementary material
Source: PubMed Central journal article supplement (PMC6030726)

# SRM

*FGCZ*

*23 October 2017*

## Distribution of qValues

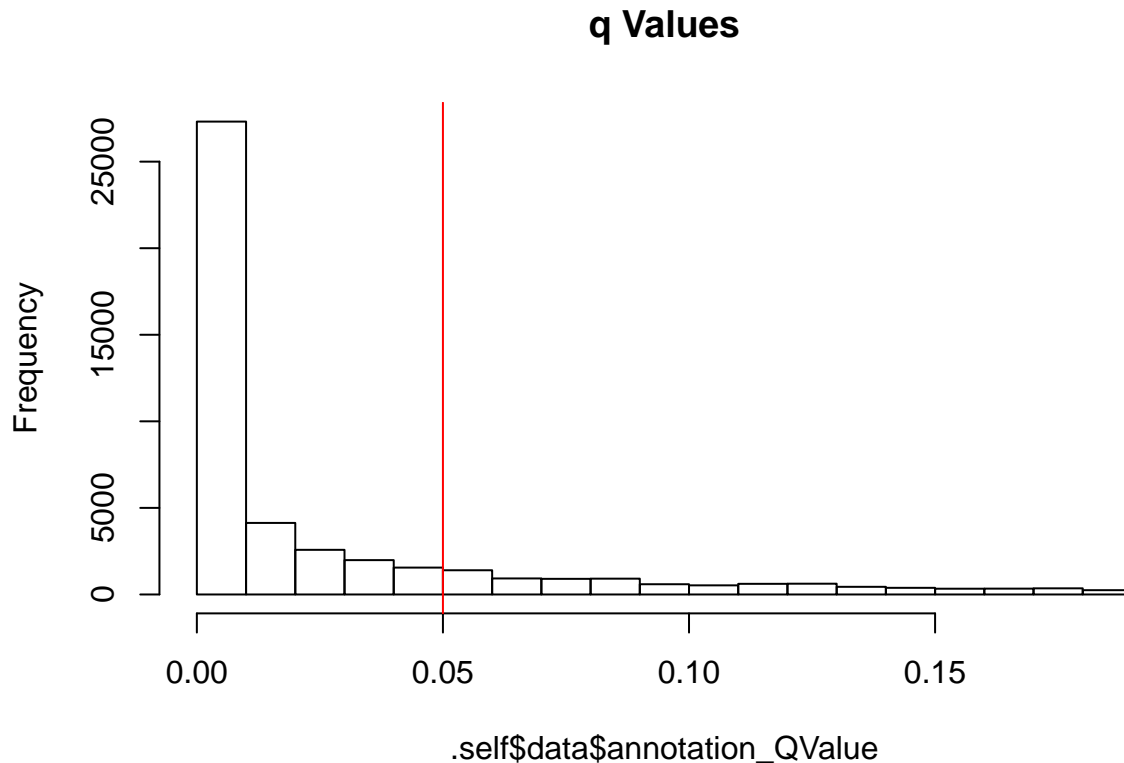

Histogram of qValues for all SRM assays. The red line indicates the qValue threshold - we control the False Discovery Rate (fdr) at this level.

## Remove all transitions with more than X missing values

Histogram showing the number of missing values for the heavy peptides in all samples. The red line indicates the maximum of NA's allowed.

Histogram showing the number of missing values for the light peptides in all samples. The red line indicates the maximum of NA's allowed.

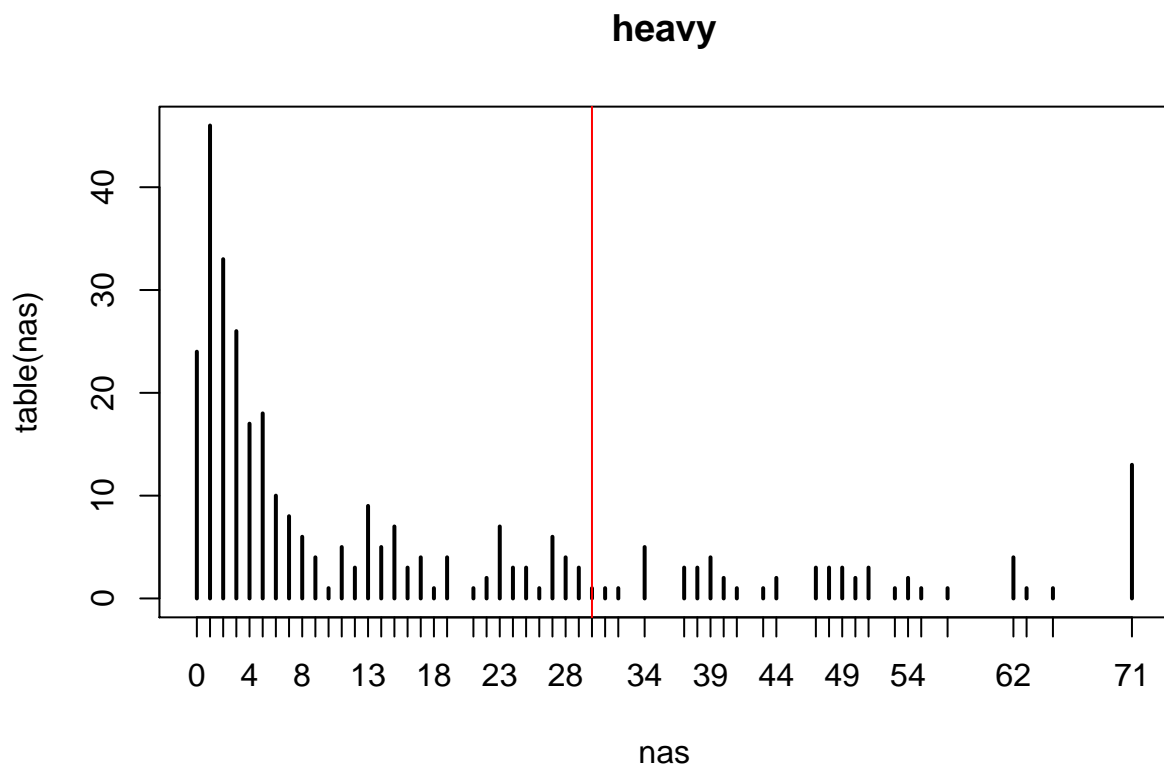

Figure 1: Distribution of NA's for heavy peptides

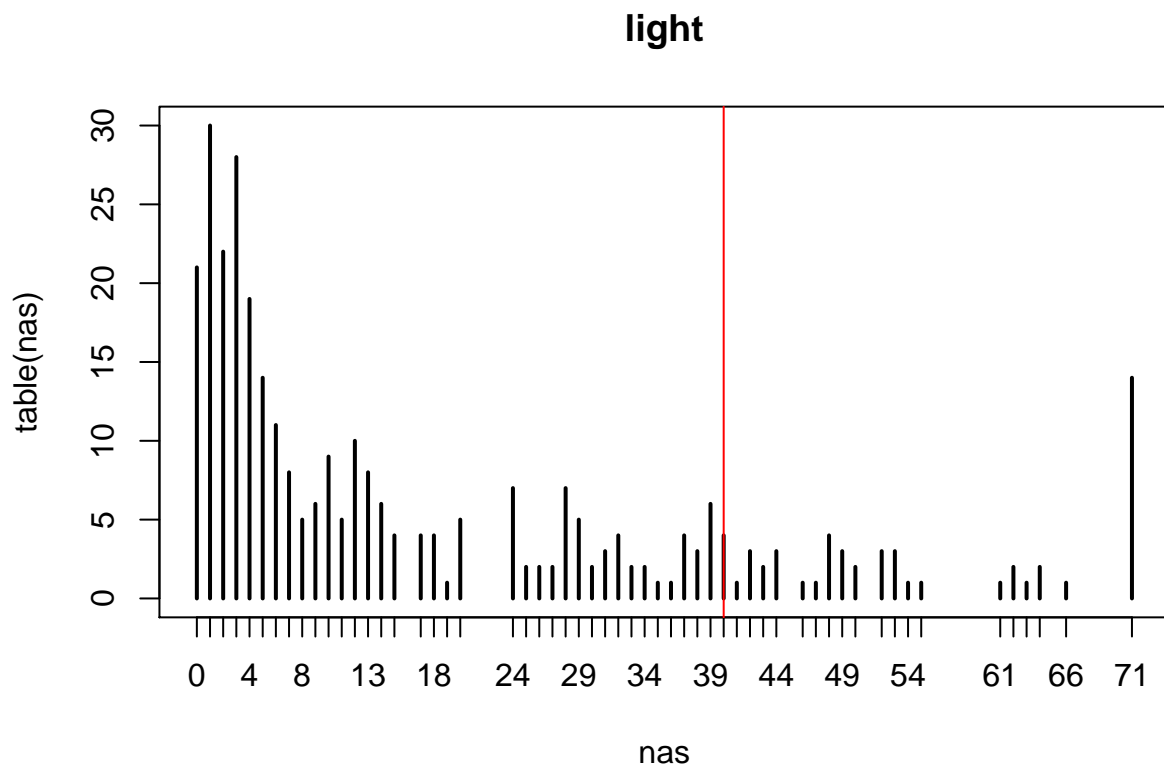

Figure 2: Distribution of NA's for light peptides.

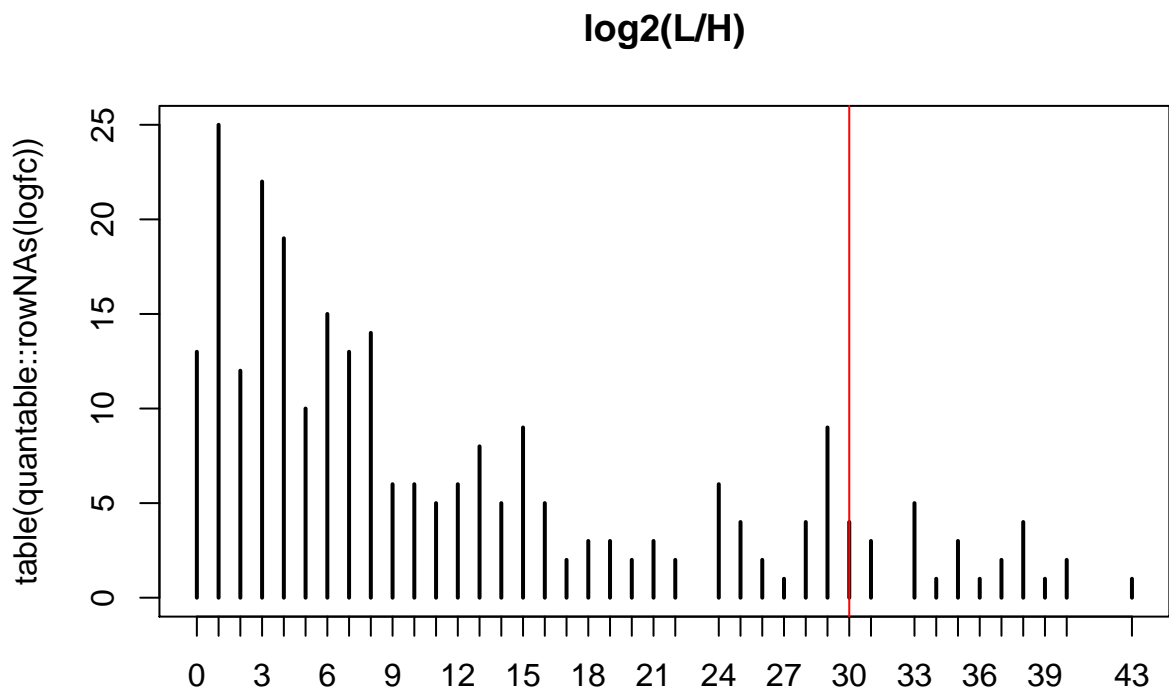

Figure 3: Missing values  $\log_2(L/H)$  per Transtion.

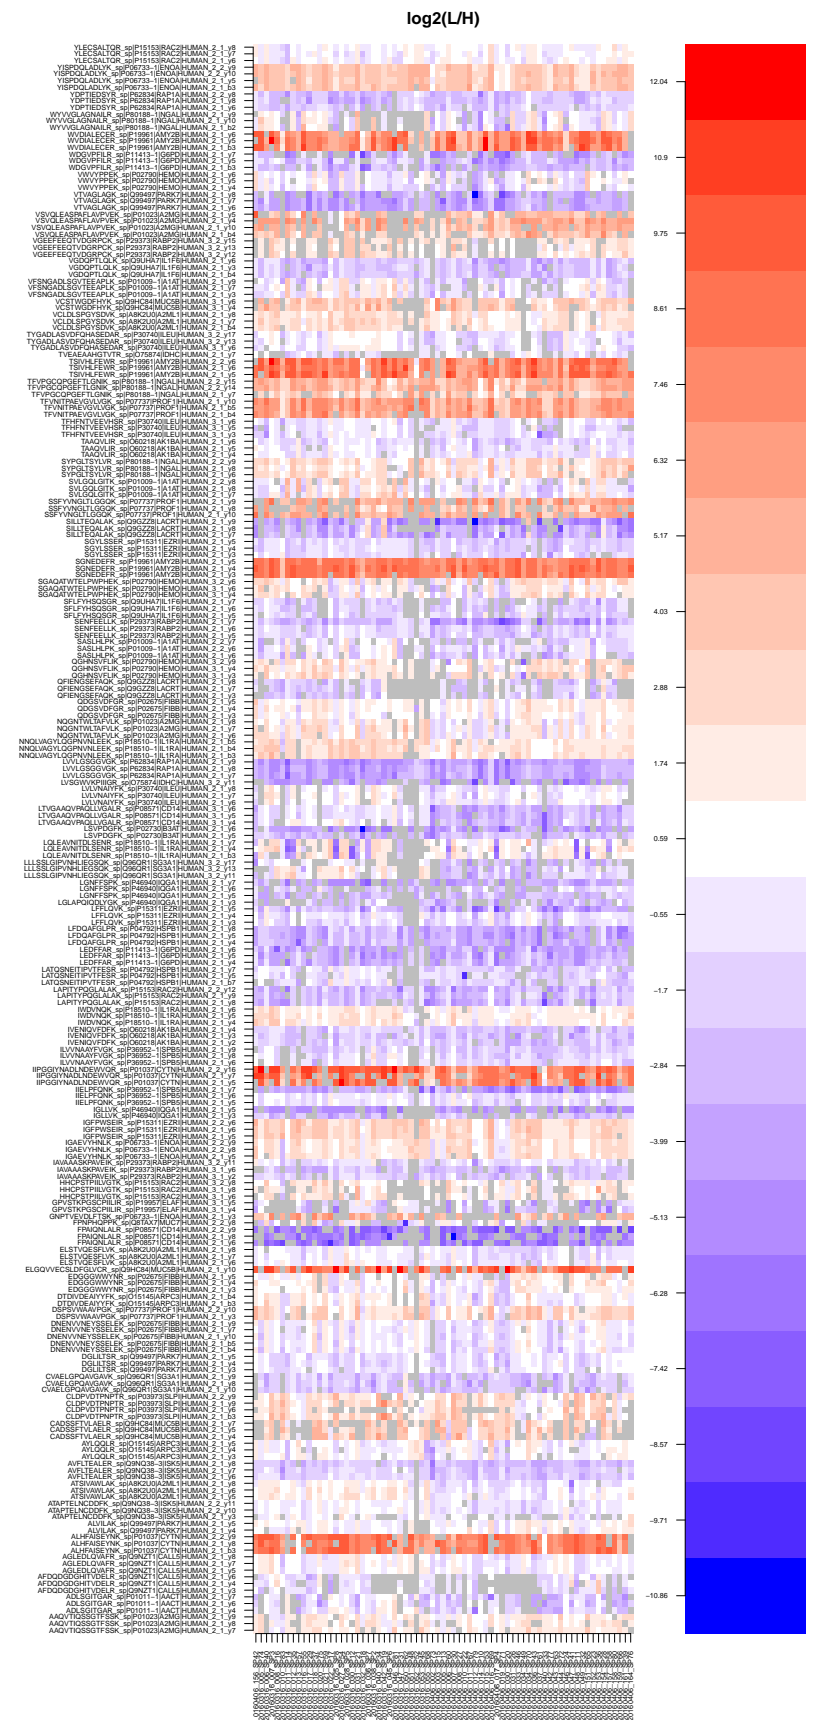

Figure 4: heatmap of log<sub>2</sub> fold changes transtion level  
5

# Heatmap of log<sub>2</sub>(L/H)

Transitions dropped because of to many NA's in log<sub>2</sub> fold change.

Table 1: removed transitions (to many NA's)

| Peptide.Sequence     | Protein.Name           | Precursor.Charge | Product.Charge | Fragment.Ion |
|----------------------|------------------------|------------------|----------------|--------------|
| AFYAELYHISSNLEK      | sp Q9UL46 PSME2 HUMAN  | 2                | 1              | b5           |
| AFYAELYHISSNLEK      | sp Q9UL46 PSME2 HUMAN  | 2                | 1              | y6           |
| AFYAELYHISSNLEK      | sp Q9UL46 PSME2 HUMAN  | 2                | 1              | y7           |
| ALVILAK              | sp Q99497 PARK7 HUMAN  | 2                | 1              | y6           |
| ASTPGAAAQIQEVK       | sp P02730 B3AT HUMAN   | 2                | 1              | y8           |
| ASTPGAAAQIQEVK       | sp P02730 B3AT HUMAN   | 2                | 1              | y9           |
| ASTPGAAAQIQEVK       | sp P02730 B3AT HUMAN   | 2                | 2              | y11          |
| CAMLNPPNR            | sp P19957 ELAF HUMAN   | 2                | 1              | b3           |
| CAMLNPPNR            | sp P19957 ELAF HUMAN   | 2                | 1              | y4           |
| CAMLNPPNR            | sp P19957 ELAF HUMAN   | 2                | 1              | y7           |
| CCPDTCGIK            | sp P03973 SLPI HUMAN   | 2                | 1              | b2           |
| CCPDTCGIK            | sp P03973 SLPI HUMAN   | 2                | 1              | y5           |
| CCPDTCGIK            | sp P03973 SLPI HUMAN   | 2                | 1              | y7           |
| DSPSVWAAVPGK         | sp P07737 PROF1 HUMAN  | 2                | 2              | b10          |
| DTDIVDEAIYYFK        | sp O15145 ARPC3 HUMAN  | 2                | 2              | y4           |
| FNLTETSEAEIHQSFQHLLR | sp P01011-1 AACT HUMAN | 3                | 1              | y9           |
| FNLTETSEAEIHQSFQHLLR | sp P01011-1 AACT HUMAN | 3                | 2              | y14          |
| FNLTETSEAEIHQSFQHLLR | sp P01011-1 AACT HUMAN | 3                | 2              | y15          |
| FNLTETSEAEIHQSFQHLLR | sp P01011-1 AACT HUMAN | 3                | 2              | y16          |
| FPNPHQPPK            | sp Q8TAX7 MUC7 HUMAN   | 2                | 1              | y3           |
| FPNPHQPPK            | sp Q8TAX7 MUC7 HUMAN   | 2                | 1              | y6           |
| GDTANEIGQVLHFENVK    | sp P36952-1 SPB5 HUMAN | 2                | 1              | y5           |
| GDTANEIGQVLHFENVK    | sp P36952-1 SPB5 HUMAN | 2                | 1              | y6           |
| GDTANEIGQVLHFENVK    | sp P36952-1 SPB5 HUMAN | 2                | 1              | y7           |
| GMHGGVPGGK           | sp Q9GZZ8 LACRT HUMAN  | 2                | 1              | y4           |
| GMHGGVPGGK           | sp Q9GZZ8 LACRT HUMAN  | 2                | 1              | y7           |
| GMHGGVPGGK           | sp Q9GZZ8 LACRT HUMAN  | 2                | 2              | y8           |
| GNPTVEVDLFTSK        | sp P06733-1 ENOA HUMAN | 2                | 1              | y6           |
| GNPTVEVDLFTSK        | sp P06733-1 ENOA HUMAN | 2                | 1              | y8           |
| GPVSTKPGSCPIILIR     | sp P19957 ELAF HUMAN   | 3                | 1              | y6           |
| GQETSTNPIASIFAWTR    | sp O75874 IDHC HUMAN   | 2                | 1              | y5           |
| GQETSTNPIASIFAWTR    | sp O75874 IDHC HUMAN   | 2                | 1              | y7           |
| GQETSTNPIASIFAWTR    | sp O75874 IDHC HUMAN   | 2                | 1              | y8           |
| GWVIHPLGLR           | sp P02730 B3AT HUMAN   | 2                | 1              | y5           |
| GWVIHPLGLR           | sp P02730 B3AT HUMAN   | 2                | 1              | y6           |
| GWVIHPLGLR           | sp P02730 B3AT HUMAN   | 2                | 1              | y7           |
| IGLLVK               | sp P46940 IQGA1 HUMAN  | 2                | 1              | y4           |
| INVNEIFYDLVR         | sp P62834 RAP1A HUMAN  | 2                | 1              | y5           |
| INVNEIFYDLVR         | sp P62834 RAP1A HUMAN  | 2                | 1              | y6           |
| INVNEIFYDLVR         | sp P62834 RAP1A HUMAN  | 2                | 1              | y7           |
| ITTLPNVTFLPQNATTISSR | sp Q8TAX7 MUC7 HUMAN   | 3                | 1              | y6           |
| ITTLPNVTFLPQNATTISSR | sp Q8TAX7 MUC7 HUMAN   | 3                | 1              | y8           |
| ITTLPNVTFLPQNATTISSR | sp Q8TAX7 MUC7 HUMAN   | 3                | 2              | y10          |
| KPECQSDWQCPGK        | sp P03973 SLPI HUMAN   | 3                | 1              | y3           |
| KPECQSDWQCPGK        | sp P03973 SLPI HUMAN   | 3                | 1              | y4           |
| KPECQSDWQCPGK        | sp P03973 SLPI HUMAN   | 3                | 1              | y5           |

| Peptide.Sequence     | Protein.Name           | Precursor.Charge | Product.Charge | Fragment.Ion |
|----------------------|------------------------|------------------|----------------|--------------|
| LGLAPQIQDLYGK        | sp P46940 IQGA1 HUMAN  | 2                | 1              | y6           |
| LGLAPQIQDLYGK        | sp P46940 IQGA1 HUMAN  | 2                | 2              | b9           |
| LQFHADVAGDIFHQQCK    | sp P11413-1 G6PD HUMAN | 3                | 1              | y5           |
| LQFHADVAGDIFHQQCK    | sp P11413-1 G6PD HUMAN | 3                | 1              | y6           |
| LQFHADVAGDIFHQQCK    | sp P11413-1 G6PD HUMAN | 3                | 2              | y9           |
| LSVPDGFK             | sp P02730 B3AT HUMAN   | 2                | 1              | y7           |
| LSYLDVYLIHWPQGFK     | sp O60218 AK1BA HUMAN  | 3                | 1              | y5           |
| LSYLDVYLIHWPQGFK     | sp O60218 AK1BA HUMAN  | 3                | 2              | y12          |
| LSYLDVYLIHWPQGFK     | sp O60218 AK1BA HUMAN  | 3                | 2              | y14          |
| LVSGWVKPIIIGR        | sp O75874 IDHC HUMAN   | 3                | 1              | y6           |
| LVSGWVKPIIIGR        | sp O75874 IDHC HUMAN   | 3                | 2              | y6           |
| LYGSEAFATDFQDSAAAK   | sp P01011-1 AACT HUMAN | 2                | 1              | y5           |
| LYGSEAFATDFQDSAAAK   | sp P01011-1 AACT HUMAN | 2                | 1              | y8           |
| LYGSEAFATDFQDSAAAK   | sp P01011-1 AACT HUMAN | 2                | 1              | y9           |
| QDGSVDFGR            | sp P02675 FIBB HUMAN   | 2                | 1              | b5           |
| SHFELPHYPGLLAHQKPFIR | sp Q8TAX7 MUC7 HUMAN   | 3                | 1              | y4           |
| SHFELPHYPGLLAHQKPFIR | sp Q8TAX7 MUC7 HUMAN   | 3                | 1              | y6           |
| SHFELPHYPGLLAHQKPFIR | sp Q8TAX7 MUC7 HUMAN   | 3                | 2              | y12          |
| STASFEELCSEYR        | sp Q9NQ38-3 ISK5 HUMAN | 2                | 1              | y5           |
| STASFEELCSEYR        | sp Q9NQ38-3 ISK5 HUMAN | 2                | 1              | y6           |
| STASFEELCSEYR        | sp Q9NQ38-3 ISK5 HUMAN | 2                | 1              | y7           |
| SWLAELQQWLKPLK       | sp P08571 CD14 HUMAN   | 3                | 1              | y4           |
| SWLAELQQWLKPLK       | sp P08571 CD14 HUMAN   | 3                | 1              | y5           |
| SWLAELQQWLKPLK       | sp P08571 CD14 HUMAN   | 3                | 1              | y6           |
| TVEAEEAAHGTVTR       | sp O75874 IDHC HUMAN   | 2                | 1              | y6           |
| TVEAEEAAHGTVTR       | sp O75874 IDHC HUMAN   | 2                | 2              | y11          |
| VCSTWGFDFHYK         | sp Q9HC84 MUC5B HUMAN  | 3                | 1              | y7           |
| VEAFQTTISK           | sp Q9UL46 PSME2 HUMAN  | 2                | 1              | y6           |
| VEAFQTTISK           | sp Q9UL46 PSME2 HUMAN  | 2                | 1              | y7           |
| VEAFQTTISK           | sp Q9UL46 PSME2 HUMAN  | 2                | 1              | y8           |
| VPFNGQDPVK           | sp P19957 ELAF HUMAN   | 2                | 1              | y3           |
| VPFNGQDPVK           | sp P19957 ELAF HUMAN   | 2                | 1              | y8           |
| VPFNGQDPVK           | sp P19957 ELAF HUMAN   | 2                | 2              | y9           |
| VSLDVNHFAPDELTVK     | sp P04792 HSPB1 HUMAN  | 2                | 1              | b9           |
| VSLDVNHFAPDELTVK     | sp P04792 HSPB1 HUMAN  | 2                | 1              | y7           |
| VSLDVNHFAPDELTVK     | sp P04792 HSPB1 HUMAN  | 2                | 1              | y8           |
| VWVLQDQTLIAVPR       | sp Q9UHA7 IL1F6 HUMAN  | 2                | 1              | b3           |
| VWVLQDQTLIAVPR       | sp Q9UHA7 IL1F6 HUMAN  | 2                | 1              | y4           |
| VWVLQDQTLIAVPR       | sp Q9UHA7 IL1F6 HUMAN  | 2                | 1              | y5           |
| WWTCFVK              | sp O15145 ARPC3 HUMAN  | 2                | 1              | y3           |
| WWTCFVK              | sp O15145 ARPC3 HUMAN  | 2                | 1              | y5           |
| WWTCFVK              | sp O15145 ARPC3 HUMAN  | 2                | 1              | y6           |

## Peptide Quantification

The following plots show  $\text{Log}_2(\text{H/L})$  of peptides belonging to the same proteins (y axis) given samples (x axis). These fold changes will be used to compute the fold H/L fold change of the protein in a sample.

**Remove all peptides with only one transition.**

Table 2: peptides removed since only a single valid transition

| Peptide.Sequence  | Protein.Name           | Precursor.Charge | Product.Charge | Fragment.Ion |
|-------------------|------------------------|------------------|----------------|--------------|
| ELGQVVECSLDFGLVCR | sp Q9HC84 MUC5B HUMAN  | 2                | 1              | y10          |
| FPNPHQPPK         | sp Q8TAX7 MUC7 HUMAN   | 2                | 2              | y8           |
| GNPTVEVDLFTSK     | sp P06733-1 ENOA HUMAN | 2                | 1              | y3           |
| LGLAPQIQDLYGK     | sp P46940 IQGA1 HUMAN  | 2                | 1              | y3           |
| LVSGWVKPIIIGR     | sp O75874 IDHC HUMAN   | 3                | 2              | y11          |
| TVEAEAAHGTVTR     | sp O75874 IDHC HUMAN   | 2                | 1              | y7           |



Removing decorrelated

## List of peptides removed

Peptides might have been removed since there were no quantified transtions, only a single transition was quantified or the transition were uncorrelated.

Table 3: All removed peptides.

| Protein.Name           | Peptide.Sequence     | Precursor.Charge |
|------------------------|----------------------|------------------|
| sp Q9UL46 PSME2 HUMAN  | AFYAELYHISSNLEK      | 2                |
| sp P02730 B3AT HUMAN   | ASTPGAAAQIQEVK       | 2                |
| sp P19957 ELAF HUMAN   | CAMLNPPNR            | 2                |
| sp P03973 SLPI HUMAN   | CCPDTCGIK            | 2                |
| sp Q9HC84 MUC5B HUMAN  | ELGQVVECSLDFGLVCR    | 2                |
| sp P01011-1 AACT HUMAN | FNLTETSEAEIHQSFQHLLR | 3                |
| sp P08571 CD14 HUMAN   | FPAIQNLALR           | 2                |
| sp Q8TAX7 MUC7 HUMAN   | FPNPHQPPK            | 2                |
| sp P36952-1 SPB5 HUMAN | GDTANEIGQVLHFENVK    | 2                |
| sp Q9GZZ8 LACRT HUMAN  | GMHGGVPGGK           | 2                |
| sp P06733-1 ENOA HUMAN | GNPTVEVDLFTSK        | 2                |
| sp O75874 IDHC HUMAN   | GQETSTNPIASIFAWTR    | 2                |
| sp P02730 B3AT HUMAN   | GWVIHPLGLR           | 2                |
| sp P46940 IQGA1 HUMAN  | IQLLVK               | 2                |
| sp P62834 RAP1A HUMAN  | INVNEIFYDLVR         | 2                |
| sp Q8TAX7 MUC7 HUMAN   | ITTLPNVTFLPQNATTISSR | 3                |
| sp P03973 SLPI HUMAN   | KPECQSDWQCPGK        | 3                |
| sp P46940 IQGA1 HUMAN  | LGLAPQIQDLYGK        | 2                |
| sp P11413-1 G6PD HUMAN | LQFHDVAGDIFHQQCK     | 3                |
| sp O60218 AK1BA HUMAN  | LSYLDVYLIHWPQGFK     | 3                |
| sp O75874 IDHC HUMAN   | LVSGWVKPIIIGR        | 3                |
| sp P01011-1 AACT HUMAN | LYGSEAFATDFQDSAAAK   | 2                |
| sp Q8TAX7 MUC7 HUMAN   | SHFELPHYPGLLAHQKPFIR | 3                |
| sp Q9NQ38-3 ISK5 HUMAN | STASFEELCSEYR        | 2                |
| sp P08571 CD14 HUMAN   | SWLAELQQWLKPGLK      | 3                |
| sp O75874 IDHC HUMAN   | TVEAEAAHGTVTR        | 2                |
| sp Q9UL46 PSME2 HUMAN  | VEAFQTTISK           | 2                |
| sp P19957 ELAF HUMAN   | VPFNGQDPVK           | 2                |
| sp P04792 HSPB1 HUMAN  | VSLDVNHFAPDELTVK     | 2                |
| sp Q9UHA7 IL1F6 HUMAN  | VWVLQDQTLIAVPR       | 2                |
| sp O15145 ARPC3 HUMAN  | WWTCFVK              | 2                |

## List of peptides used for quantification

Table 4: Peptides Still available and Nr of transitions per peptide.  
Columns charge state.

|                     | 2 | 3 |
|---------------------|---|---|
| AAQVTIQSSGTFSSK     | 3 | 0 |
| ADLSGITGAR          | 3 | 0 |
| AFDQDGDGHITVDELR    | 3 | 0 |
| AGLEDLQVAFR         | 3 | 0 |
| ALHFAISEYNK         | 3 | 0 |
| ALVILAK             | 2 | 0 |
| ATAPTELNCDDFK       | 3 | 0 |
| ATSIVAWLAK          | 3 | 0 |
| AVFLTEALER          | 3 | 0 |
| AYLQQLR             | 3 | 0 |
| CADSSFTVLAELR       | 3 | 0 |
| CLDPVDTPNPTR        | 4 | 0 |
| CVAELGPQAVGAVK      | 3 | 0 |
| DGLILTSR            | 3 | 0 |
| DNENVVNEYSSELEK     | 5 | 0 |
| DSPSVWAAVPGK        | 2 | 0 |
| DTDIVDEAIYYFK       | 2 | 0 |
| EDGGGWYNR           | 3 | 0 |
| ELSTVQESFLVK        | 3 | 0 |
| GPVSTKPGSCPIILIR    | 0 | 2 |
| HHCPSPTIILVGTK      | 0 | 3 |
| IAVAAASKPAVEIK      | 0 | 3 |
| IGAEVYHNLK          | 3 | 0 |
| IGFPWSEIR           | 3 | 0 |
| IIELPFQNK           | 3 | 0 |
| IIPGGIYNADLNDEWVQR  | 3 | 0 |
| ILVNAAAYFVGK        | 3 | 0 |
| IVENIQVFDFK         | 3 | 0 |
| IWDVNQK             | 3 | 0 |
| LAPITYPQGLALAK      | 3 | 0 |
| LATQSNEITIPVTFESR   | 3 | 0 |
| LEDFAR              | 3 | 0 |
| LFDQAFGLPR          | 3 | 0 |
| LFFLQVK             | 3 | 0 |
| LGNFFSPK            | 2 | 0 |
| LLLSSLGIPVNHLEGSQK  | 0 | 3 |
| LQLEAVNITDLSNR      | 3 | 0 |
| LSVPDGFK            | 2 | 0 |
| LTVGAAQVPAQLLVGALR  | 0 | 3 |
| LVLVNAIYFK          | 3 | 0 |
| LVVLGSGGVGK         | 3 | 0 |
| NNQLVAGYLQGPVNLLEEK | 3 | 0 |
| NQGNTWLTAFLVK       | 3 | 0 |
| QDGSVDFGR           | 3 | 0 |
| QFIENGSEFAQK        | 3 | 0 |
| QGHNSVFLIK          | 0 | 3 |
| SASLHLPK            | 3 | 0 |

|                     | 2 | 3 |
|---------------------|---|---|
| SENFEECLK           | 3 | 0 |
| SFLFYHSQSGR         | 3 | 0 |
| SGAQATWTELPWPHEK    | 0 | 3 |
| SGNEDEFR            | 3 | 0 |
| SGYLSSER            | 3 | 0 |
| SILLTEQALAK         | 3 | 0 |
| SSFYVNGLTTLGGQK     | 3 | 0 |
| SVLGQLGITK          | 3 | 0 |
| SYPGLTSYLVR         | 3 | 0 |
| TAAQVLIR            | 3 | 0 |
| TFHFNTVEEVHSR       | 0 | 3 |
| TFVNITPAEVGVLVGK    | 3 | 0 |
| TFVPGCQPGFETLGNIK   | 3 | 0 |
| TSIVHLFEWR          | 3 | 0 |
| TYGADLASVDFQHASEDAR | 0 | 3 |
| VCLDLSPGYSDVK       | 3 | 0 |
| VCSTWGDHFYK         | 0 | 2 |
| VFSNGADLSGVTEEAPLK  | 3 | 0 |
| VGDQPTLQLK          | 3 | 0 |
| VGEEFEEQTVDGRPCK    | 0 | 3 |
| VSVQLEASPAFLAVPVEK  | 4 | 0 |
| VTVAGLAGK           | 3 | 0 |
| VWVYPPEK            | 3 | 0 |
| WDGVPFILR           | 3 | 0 |
| WVDIALECER          | 3 | 0 |
| WYVVGLAGNAILR       | 3 | 0 |
| YDPTIEDSYR          | 3 | 0 |
| YISPDQLADLYK        | 4 | 0 |
| YLECSALTQR          | 3 | 0 |

# Peptide Intensities

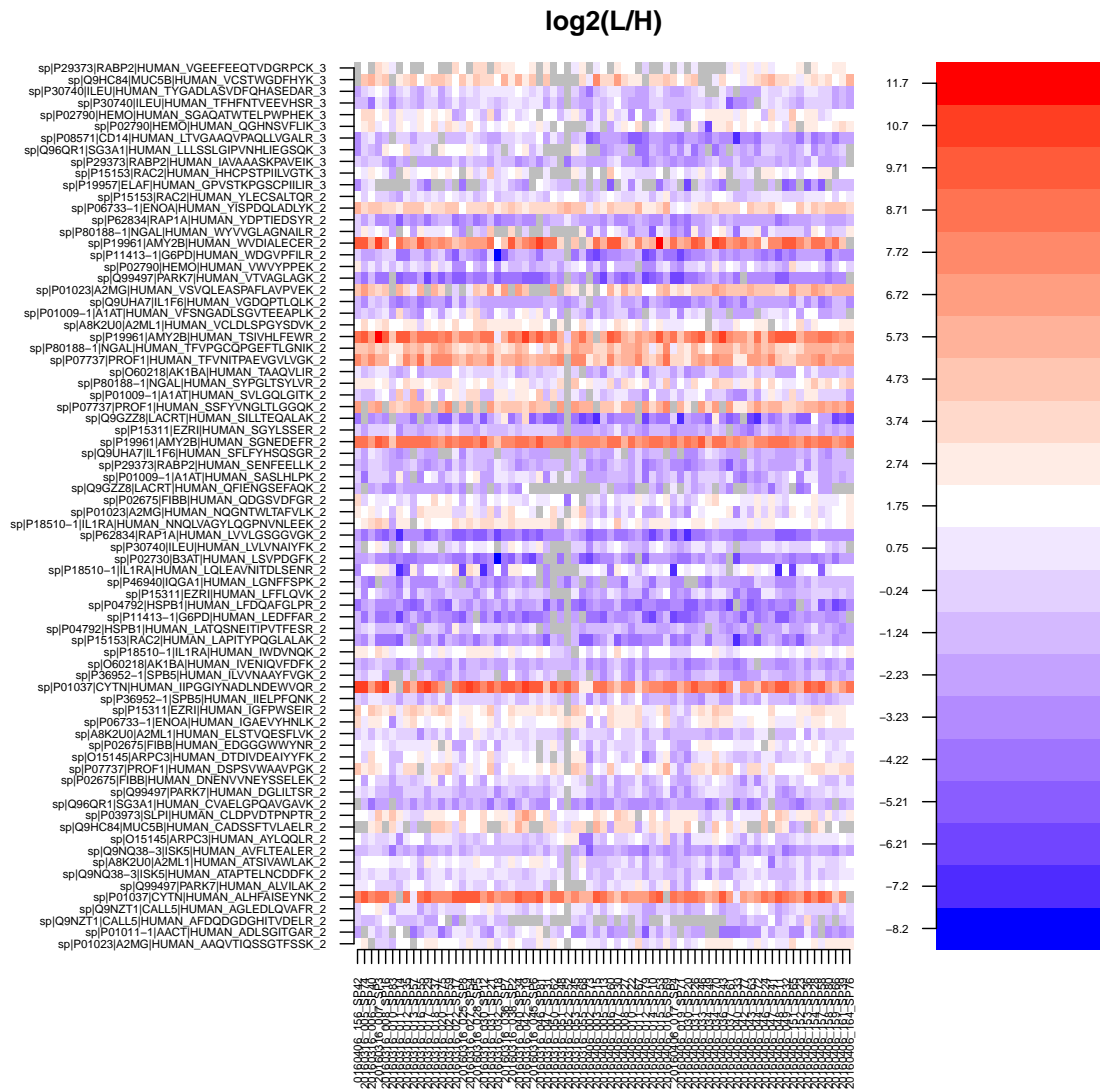

# Protein Intensities

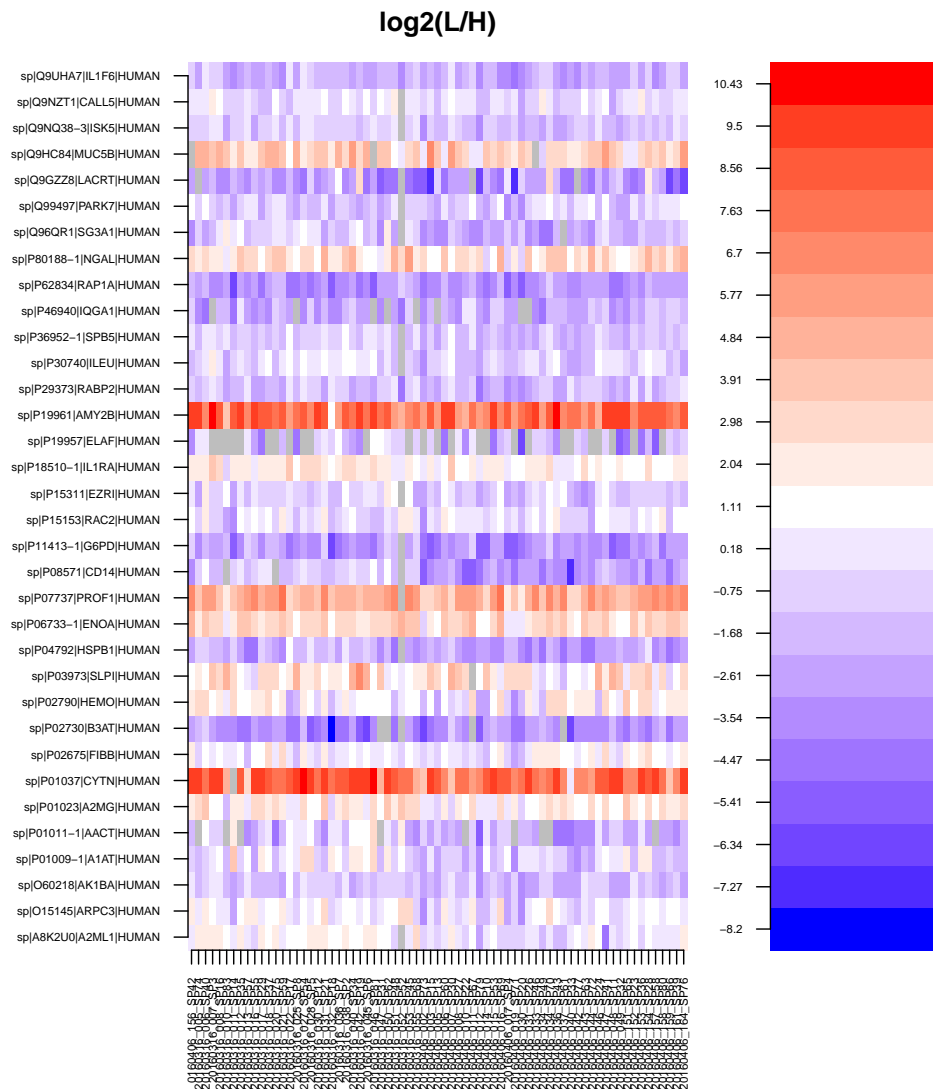

## List of quantified proteins

Table 5: Quantified proteins with number of peptides used for quantification

| Protein                 | NrPeptides |
|-------------------------|------------|
| sp A8K2U0 A2ML1 HUMAN   | 3          |
| sp O15145 ARPC3 HUMAN   | 2          |
| sp O60218 AK1BA HUMAN   | 2          |
| sp P01009-1 A1AT HUMAN  | 3          |
| sp P01011-1 AACT HUMAN  | 1          |
| sp P01023 A2MG HUMAN    | 3          |
| sp P01037 CYTN HUMAN    | 2          |
| sp P02675 FIBB HUMAN    | 3          |
| sp P02730 B3AT HUMAN    | 1          |
| sp P02790 HEMO HUMAN    | 3          |
| sp P03973 SLPI HUMAN    | 1          |
| sp P04792 HSPB1 HUMAN   | 2          |
| sp P06733-1 ENOA HUMAN  | 2          |
| sp P07737 PROF1 HUMAN   | 3          |
| sp P08571 CD14 HUMAN    | 1          |
| sp P11413-1 G6PD HUMAN  | 2          |
| sp P15153 RAC2 HUMAN    | 3          |
| sp P15311 EZRI HUMAN    | 3          |
| sp P18510-1 IL1RA HUMAN | 3          |
| sp P19957 ELAF HUMAN    | 1          |
| sp P19961 AMY2B HUMAN   | 3          |
| sp P29373 RABP2 HUMAN   | 3          |
| sp P30740 ILEU HUMAN    | 3          |
| sp P36952-1 SPB5 HUMAN  | 2          |
| sp P46940 IQGA1 HUMAN   | 1          |
| sp P62834 RAP1A HUMAN   | 2          |
| sp P80188-1 NGAL HUMAN  | 3          |
| sp Q96QR1 SG3A1 HUMAN   | 2          |
| sp Q99497 PARK7 HUMAN   | 3          |
| sp Q9GZZ8 LACRT HUMAN   | 2          |
| sp Q9HC84 MUC5B HUMAN   | 2          |
| sp Q9NQ38-3 ISK5 HUMAN  | 2          |
| sp Q9NZT1 CALL5 HUMAN   | 2          |
| sp Q9UHA7 IL1F6 HUMAN   | 2          |

## List of proteins not quantified

---

proteins

---

sp|Q9UL46|PSME2|HUMAN

sp|Q8TAX7|MUC7|HUMAN

---

sp|O75874|IDHC|HUMAN

---



# Peptide profiles per Protein

## sp|A8K2U0|A2ML1|HUMAN

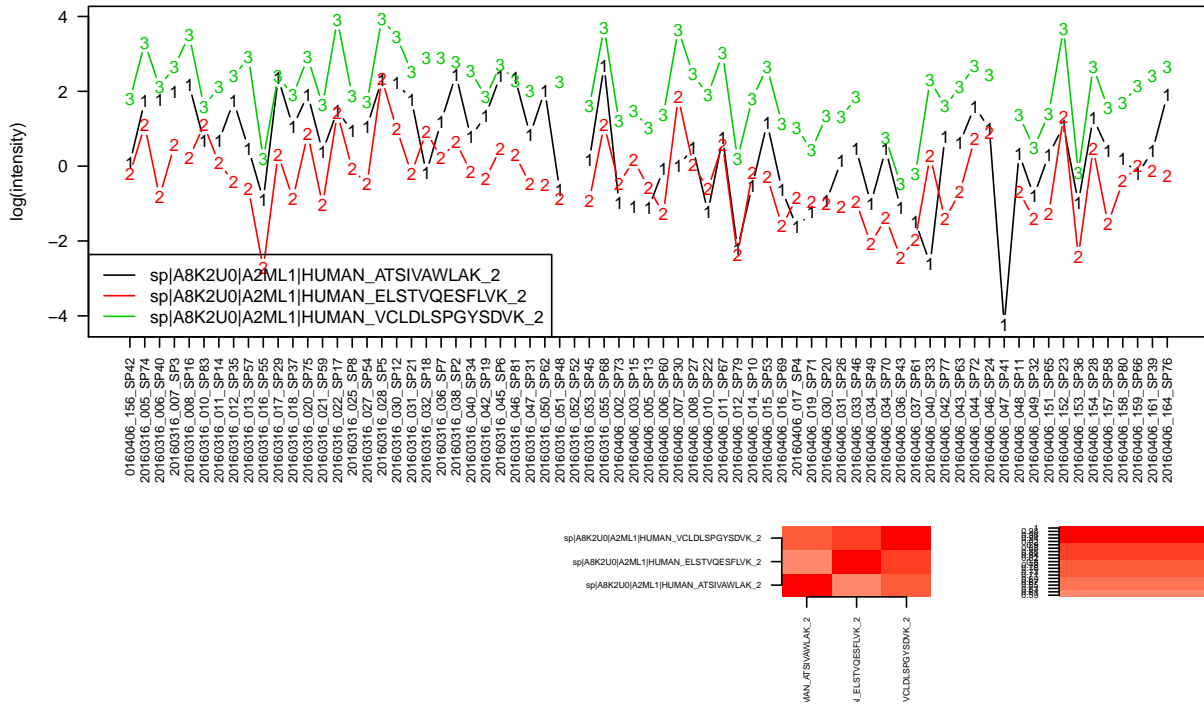

## sp|O15145|ARPC3|HUMAN

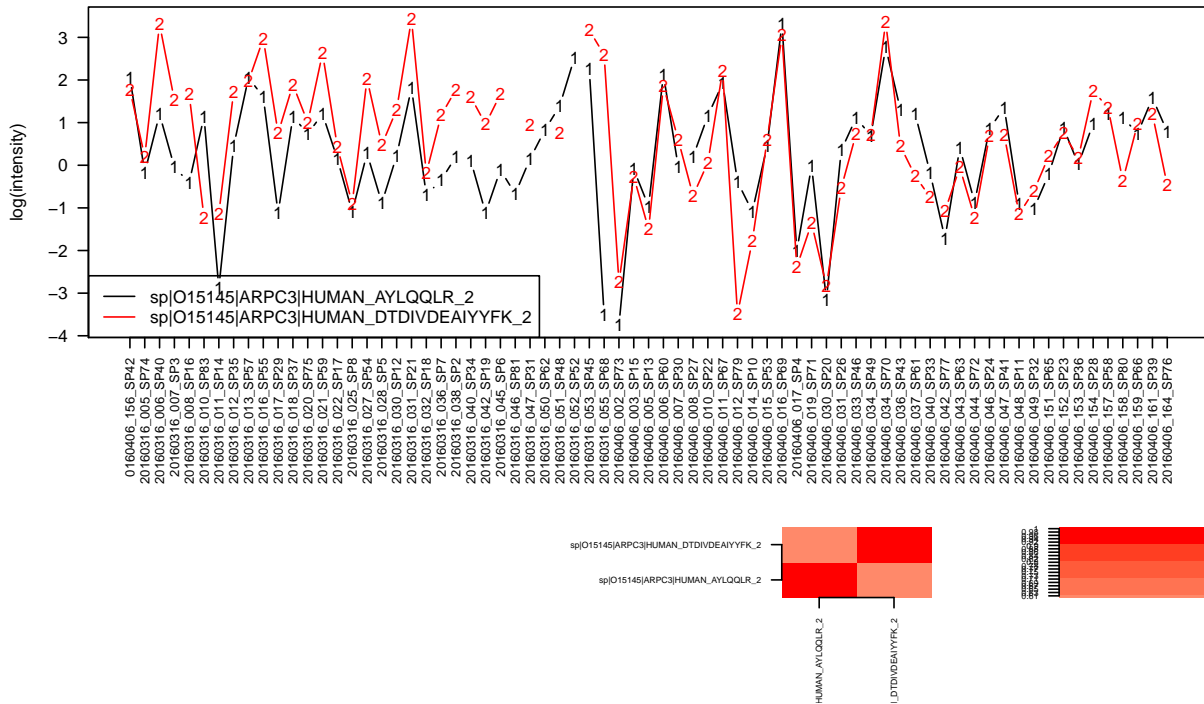

sp|O60218|AK1BA|HUMAN

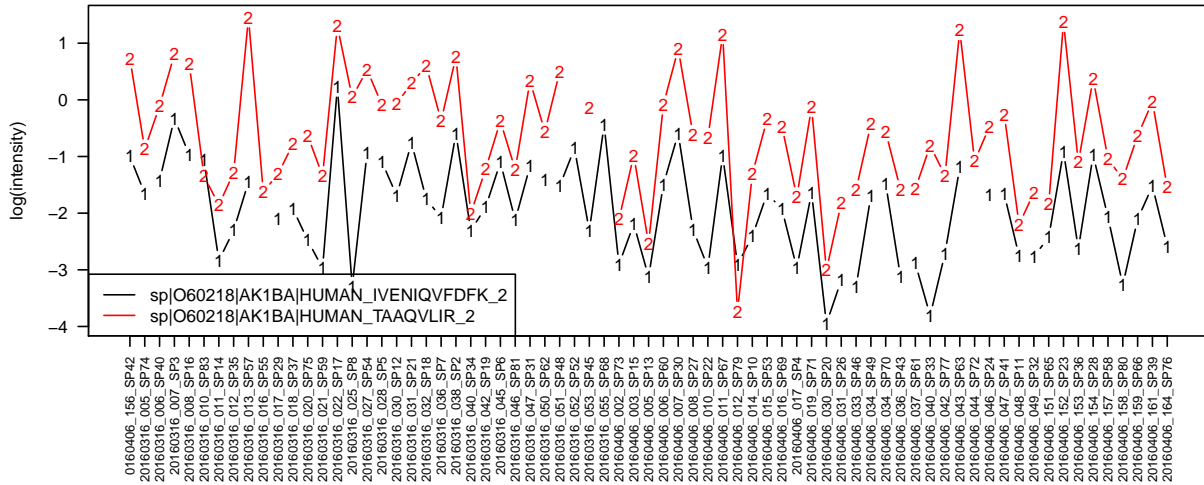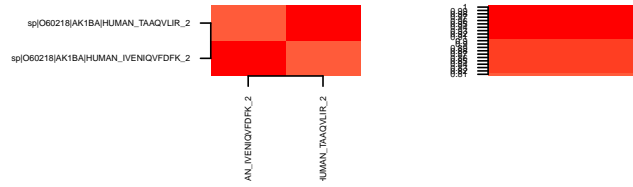

sp|P01009-1|A1AT|HUMAN

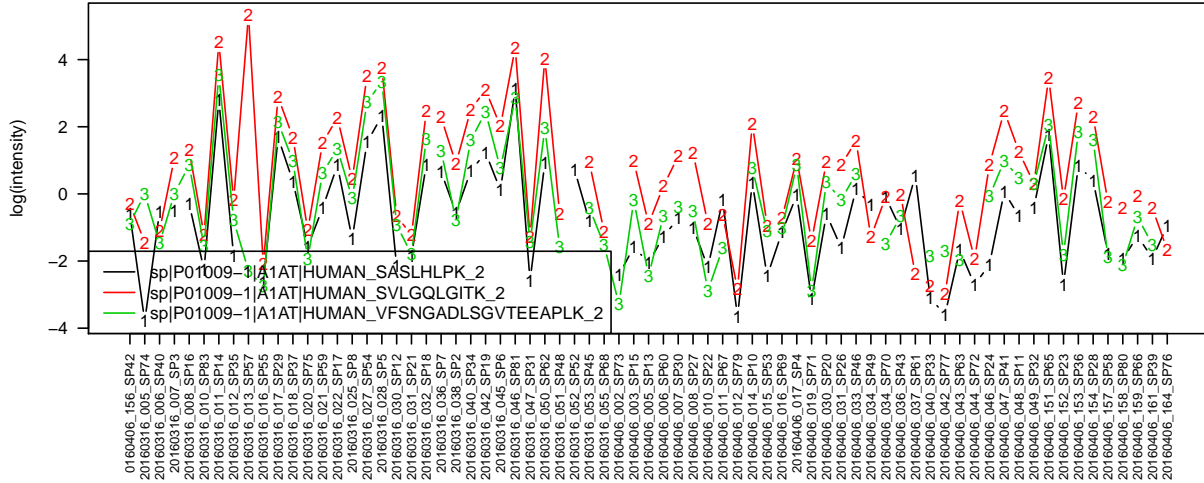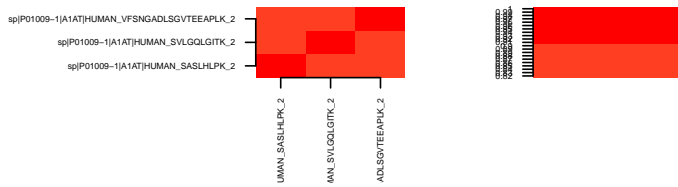

sp|P01011-1|AACT|HUMAN

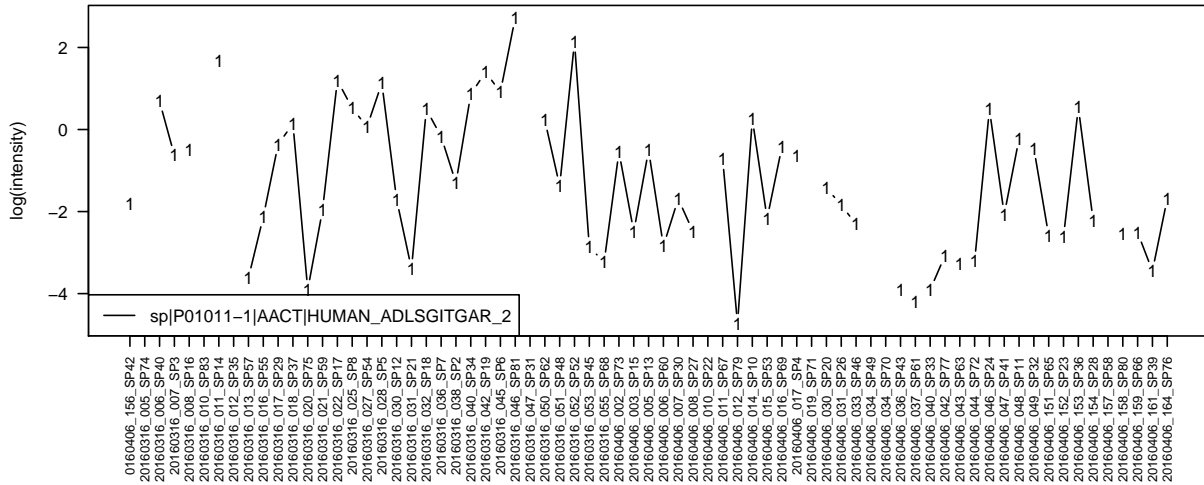

sp|P01023|A2MG|HUMAN

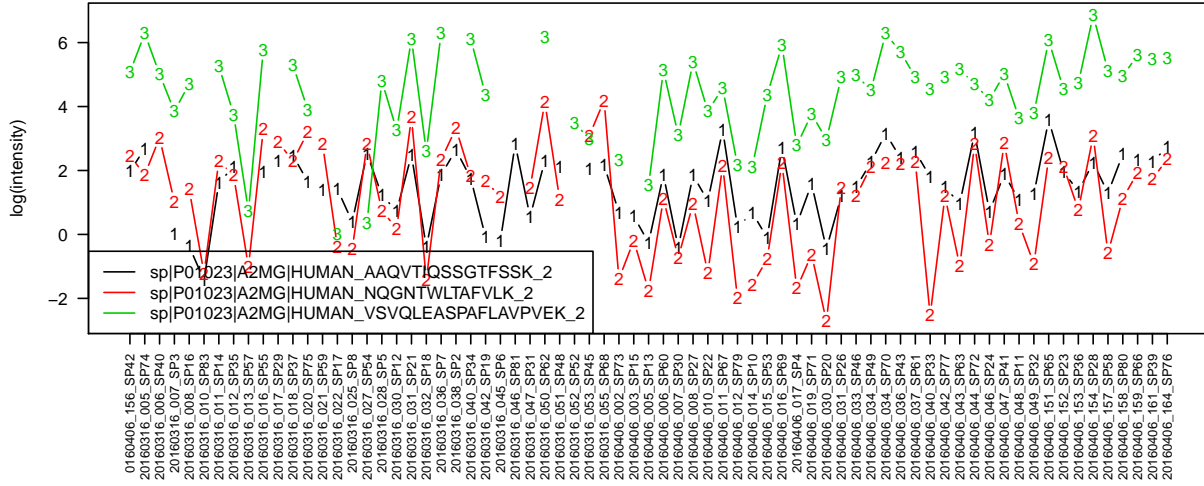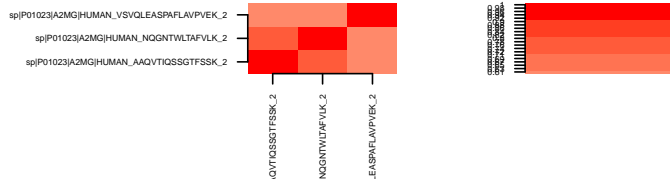

sp|P01037|CYTN|HUMAN

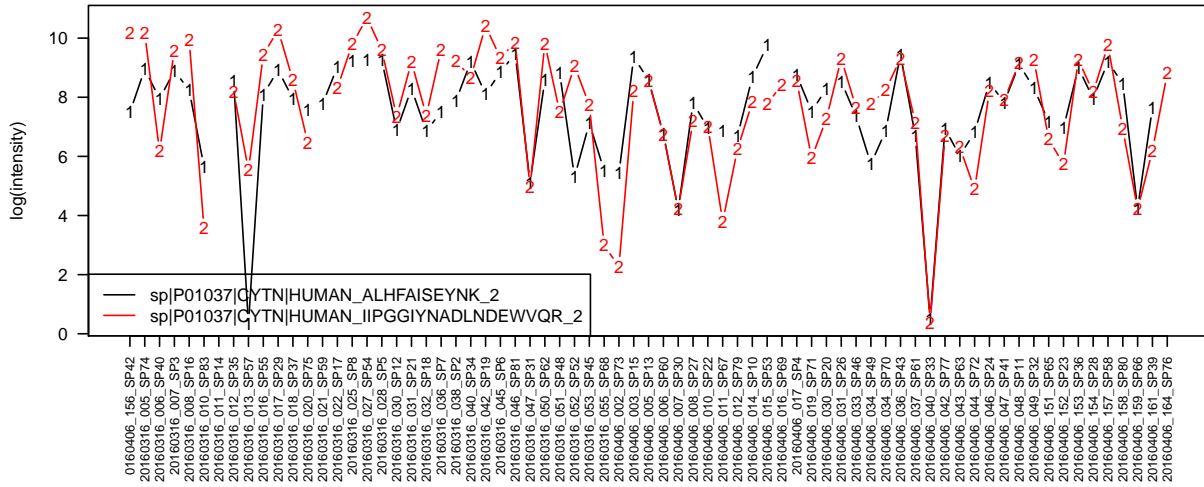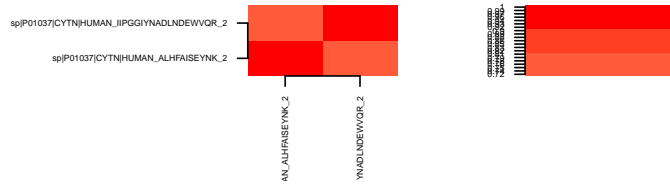

sp|P02675|FIBB|HUMAN

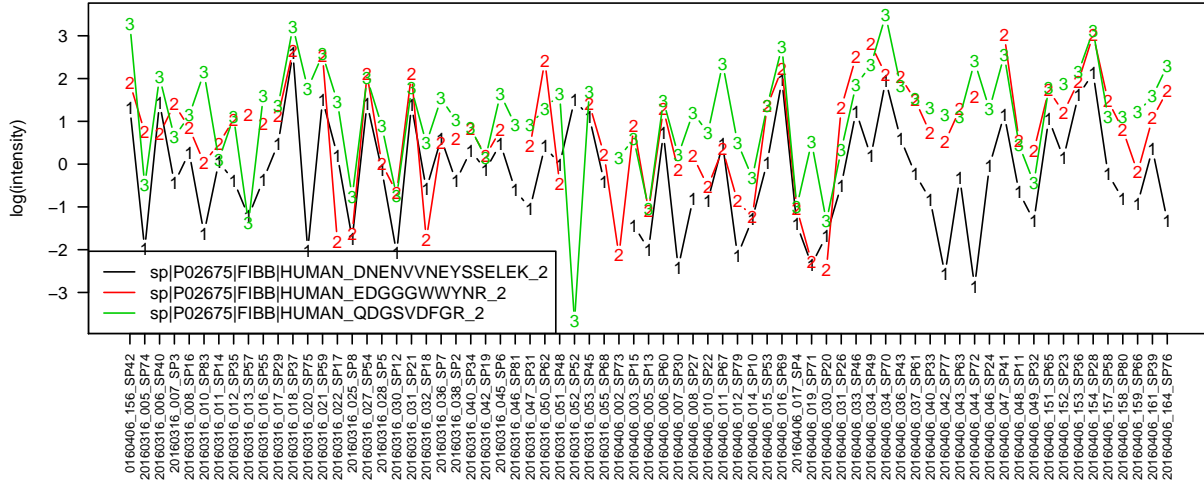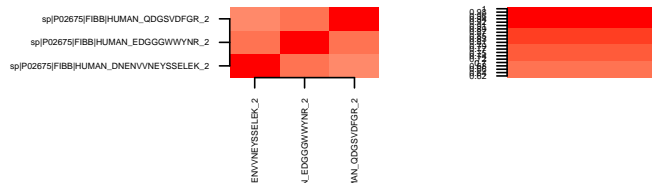

sp|P02730|B3AT|HUMAN

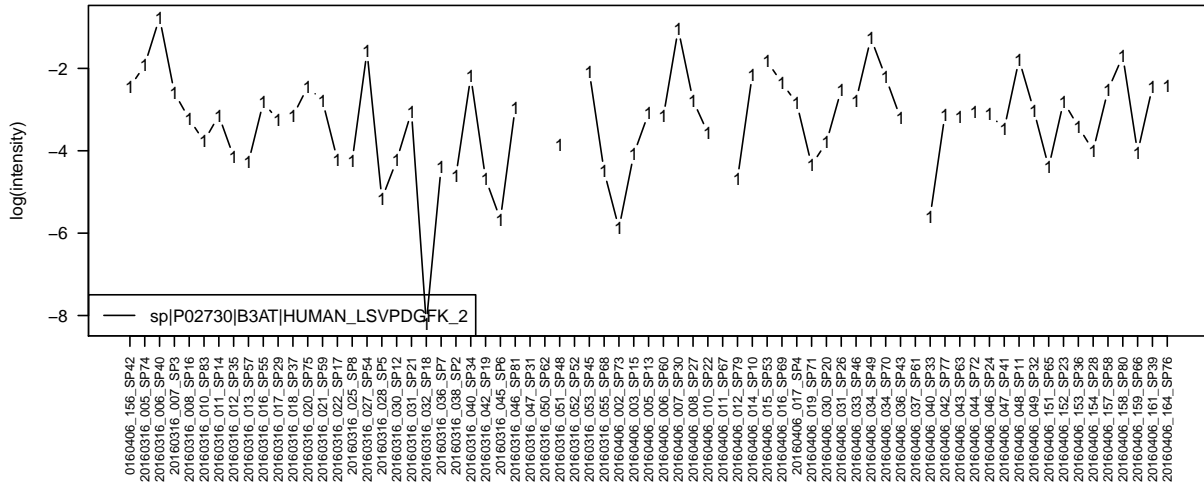

sp|P02790|HEMO|HUMAN

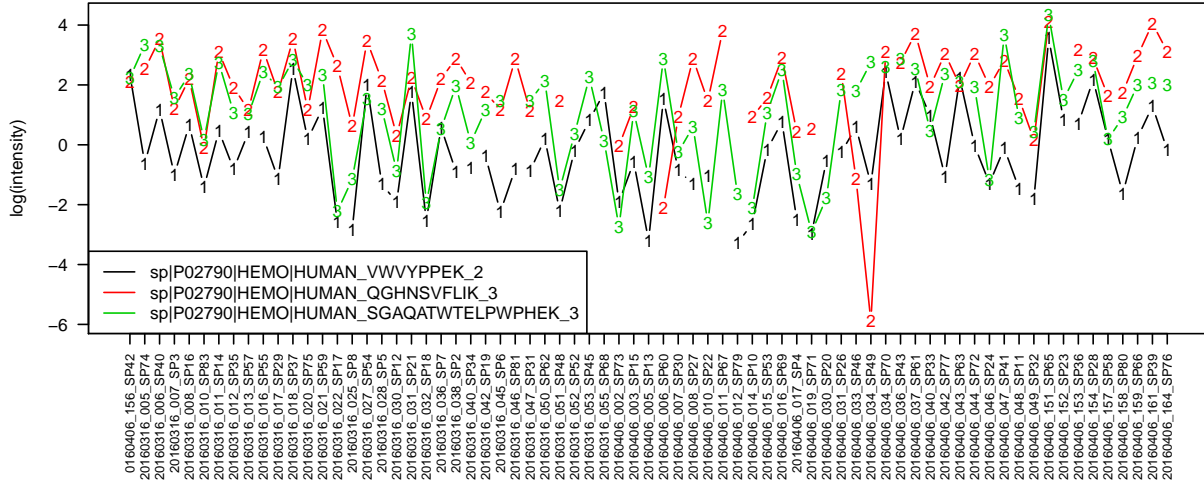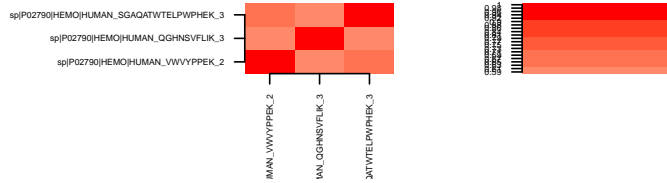

sp|P03973|SLPI|HUMAN

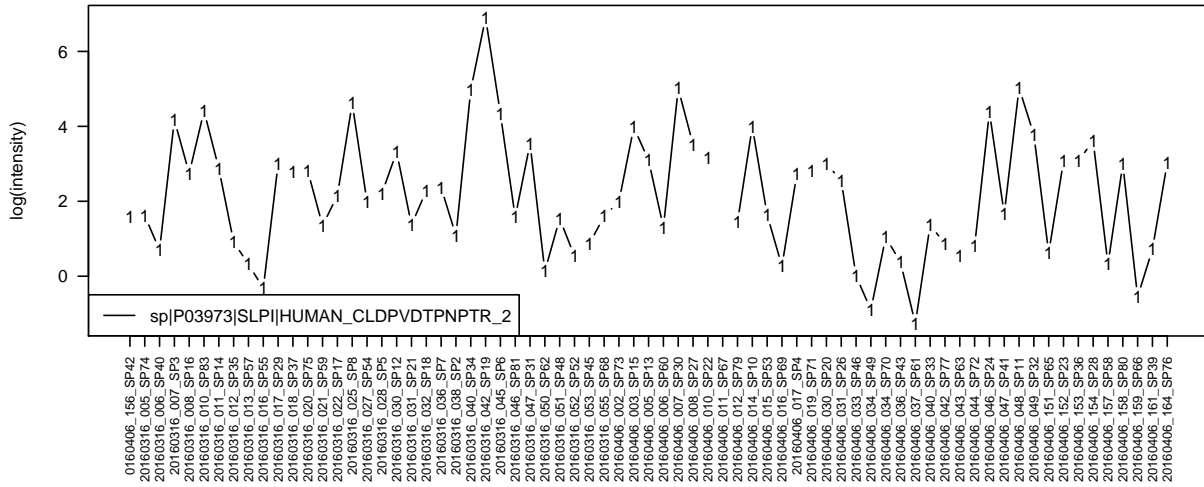

sp|P04792|HSPB1|HUMAN

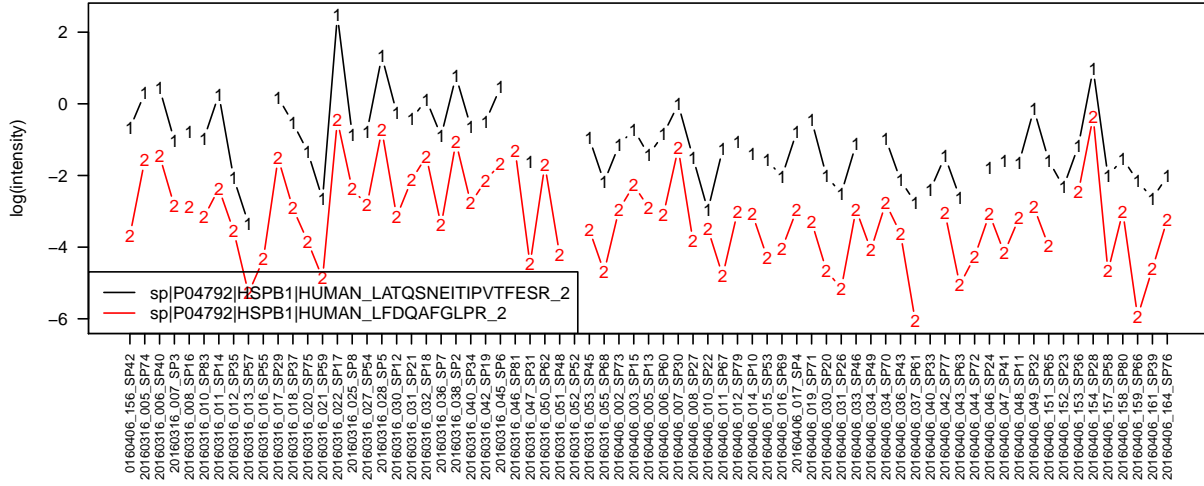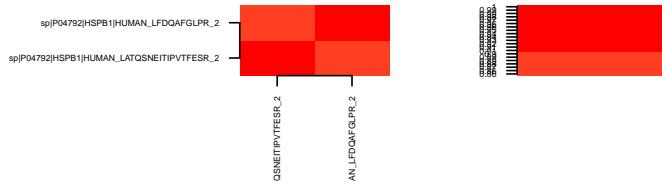

sp|P06733-1|ENOA|HUMAN

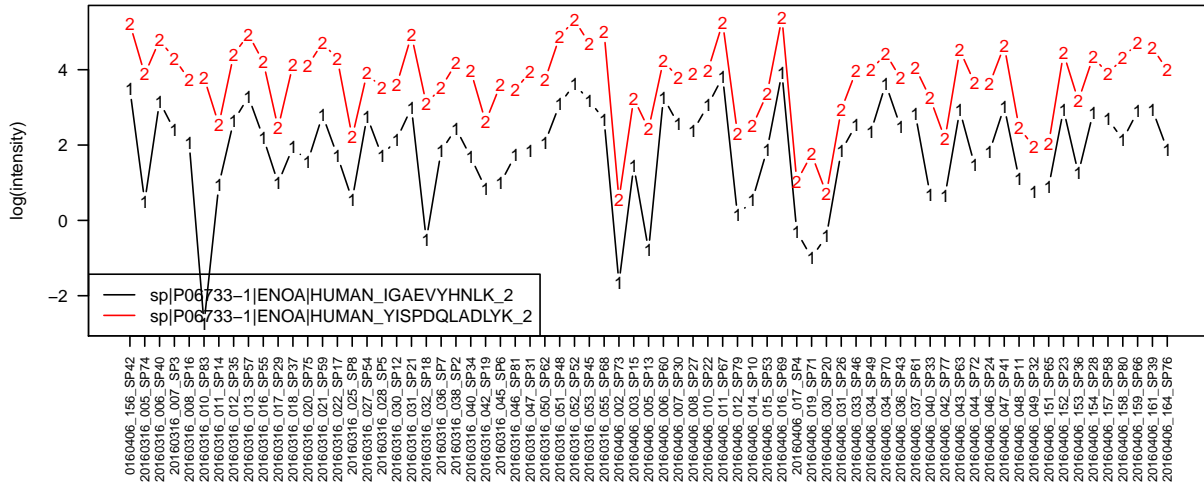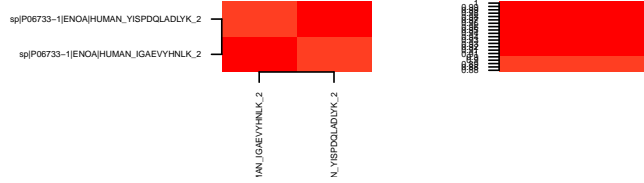

sp|P07737|PROF1|HUMAN

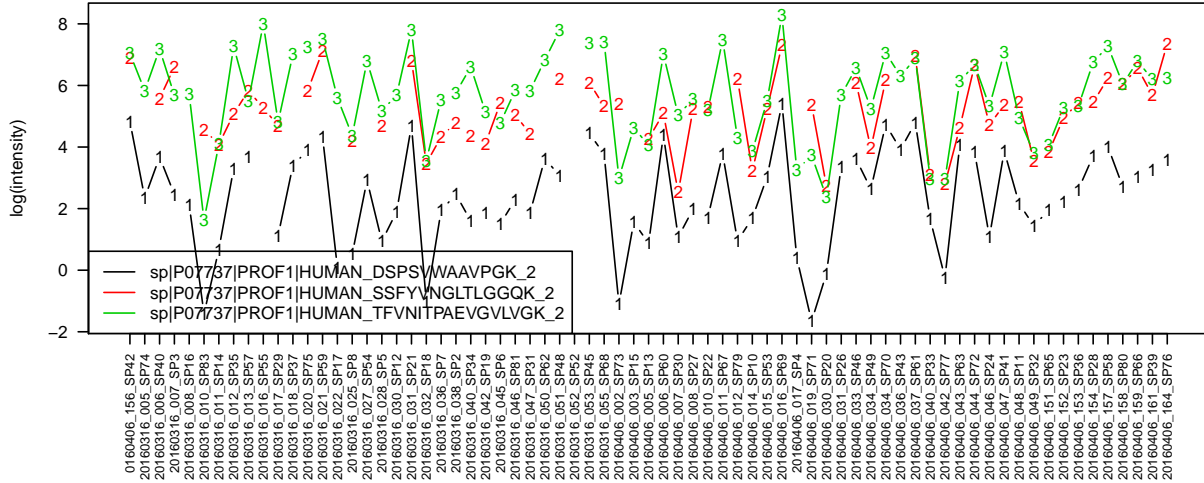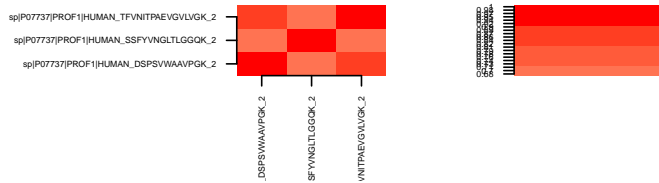

sp|P08571|CD14|HUMAN

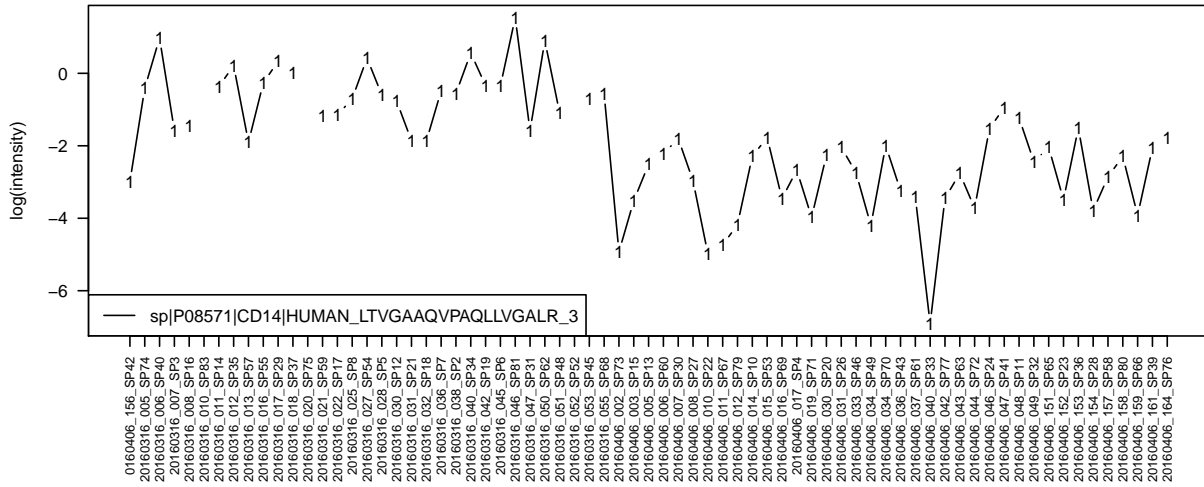

sp|P11413-1|G6PD|HUMAN

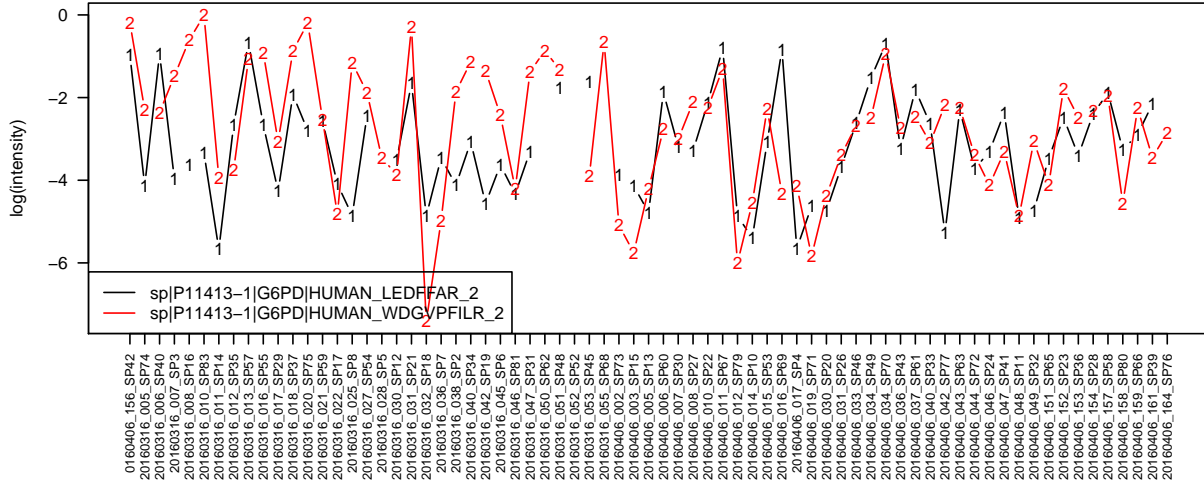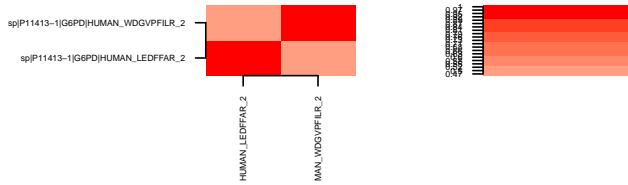



### sp|P15153|RAC2|HUMAN

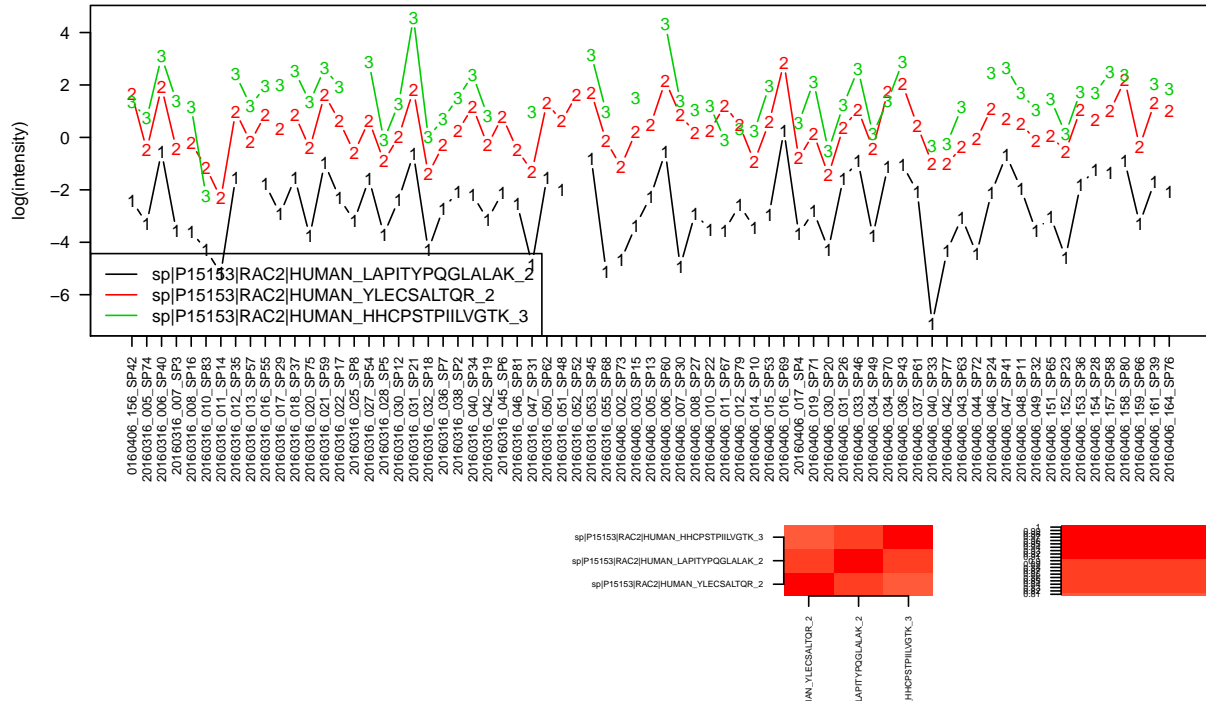

### sp|P15311|EZRI|HUMAN

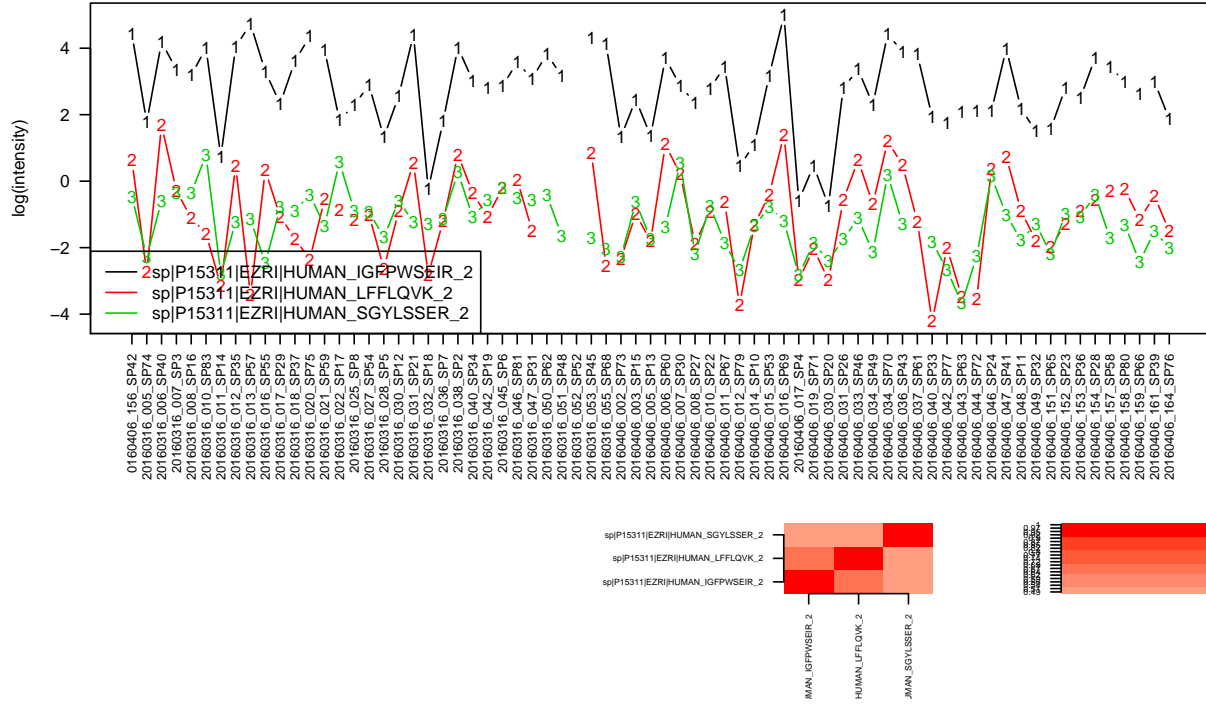

sp|P18510-1|IL1RA|HUMAN

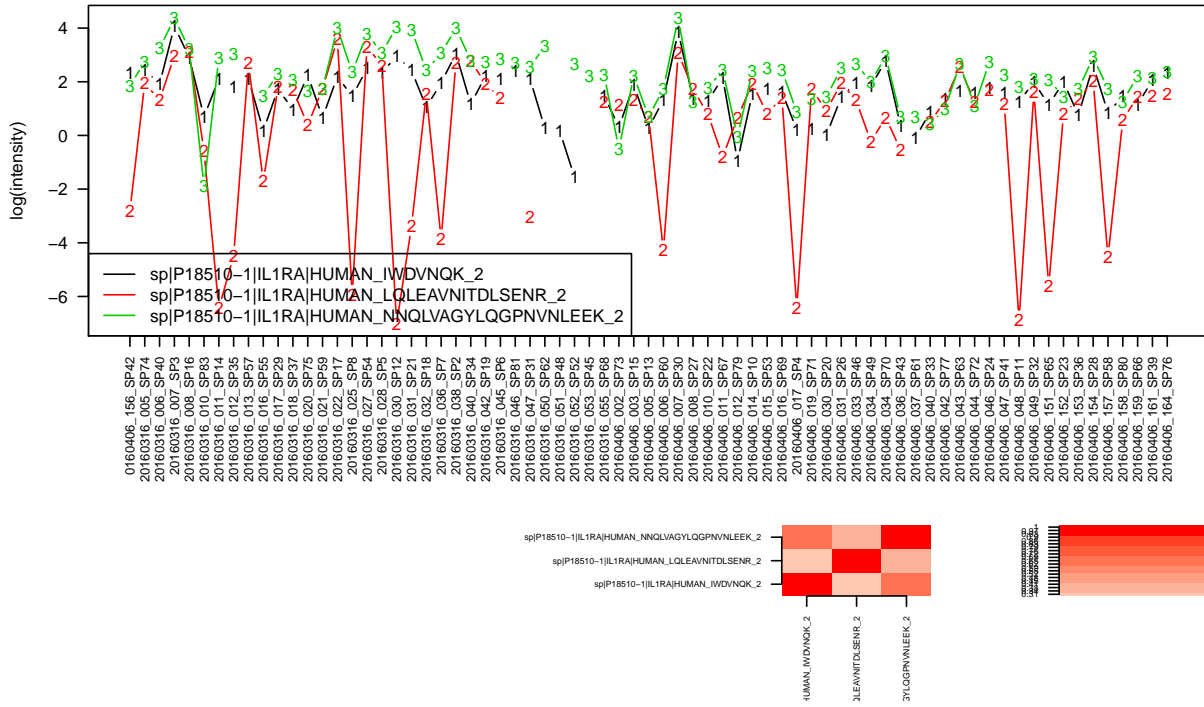

sp|P19957|ELAF|HUMAN

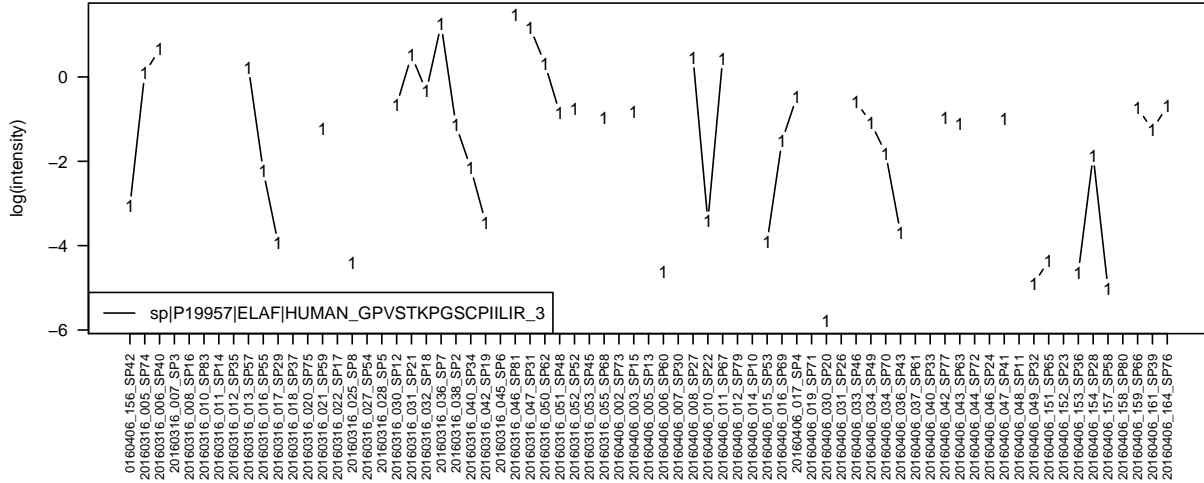

sp|P19961|AMY2B|HUMAN

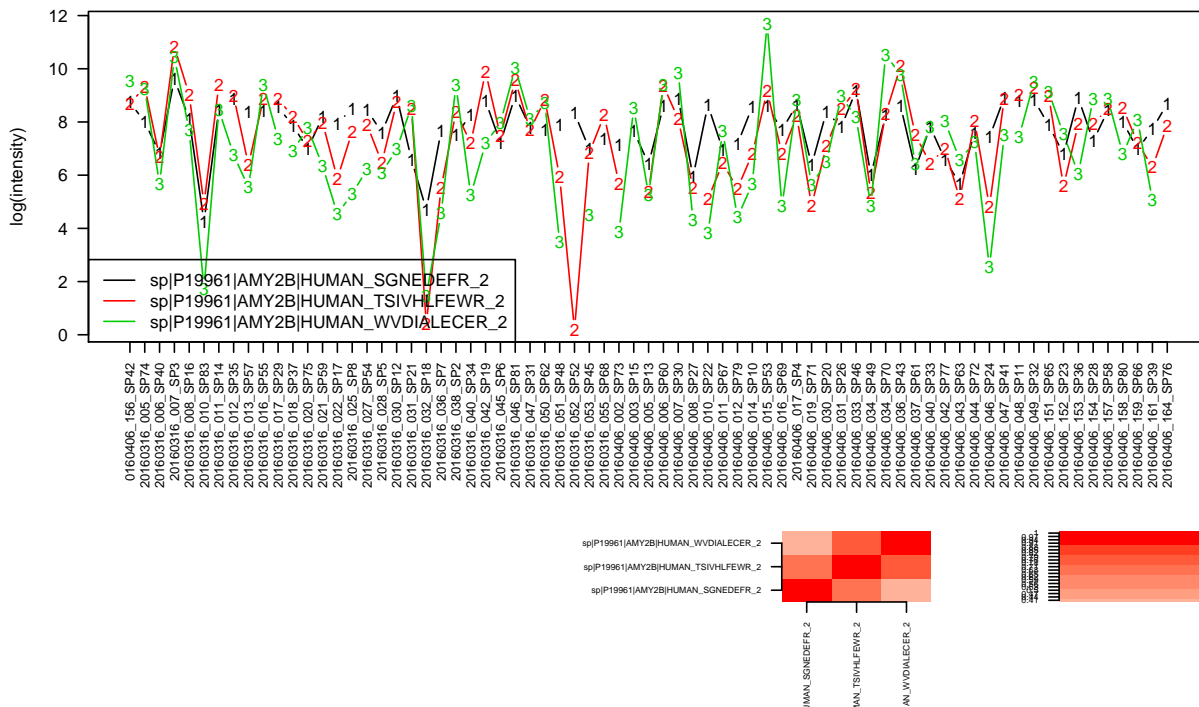

sp|P29373|RABP2|HUMAN

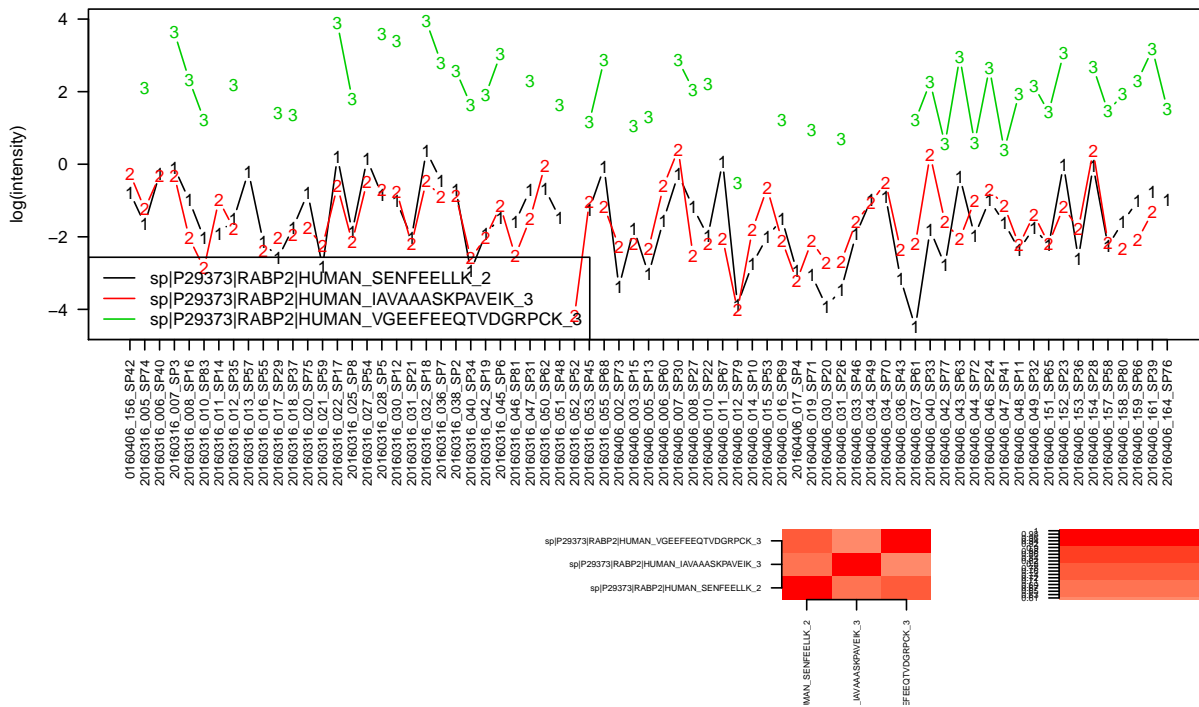

sp|P30740|ILEU|HUMAN

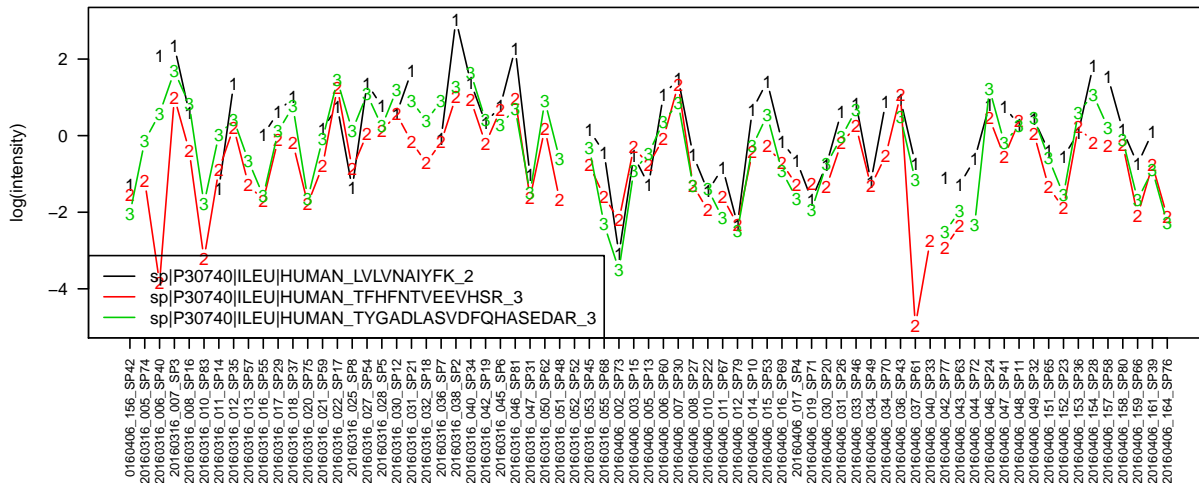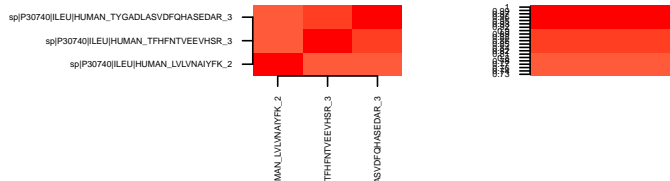

sp|P36952-1|SPB5|HUMAN

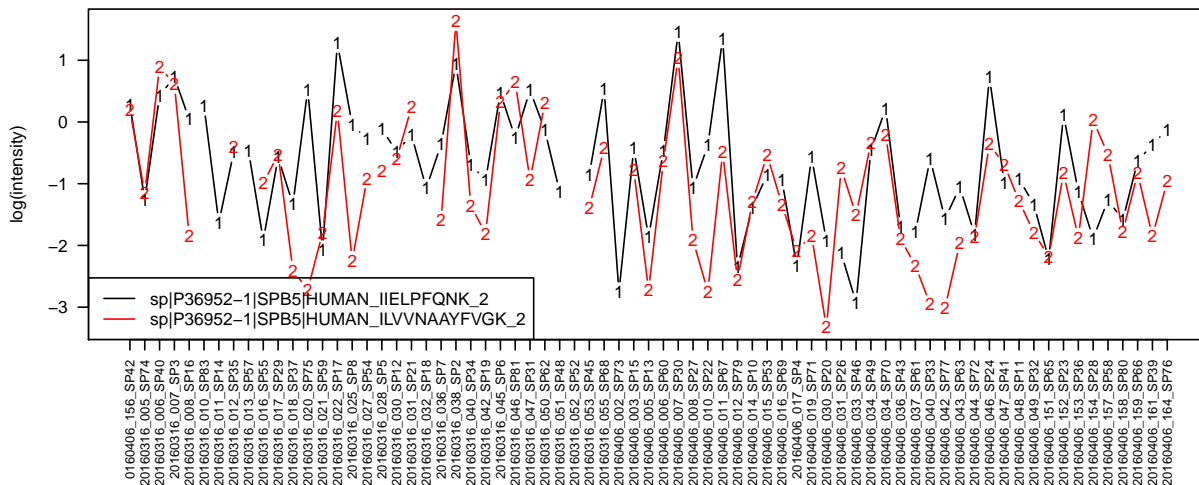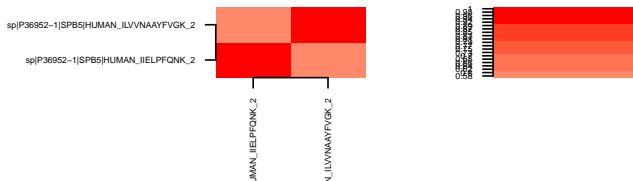

sp|P46940|IQGA1|HUMAN

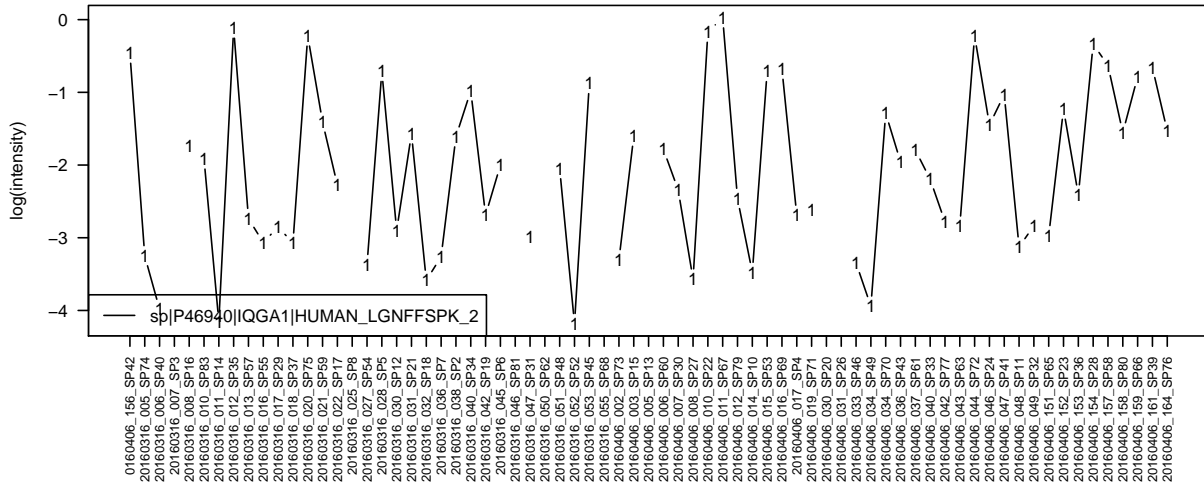

sp|P62834|RAP1A|HUMAN

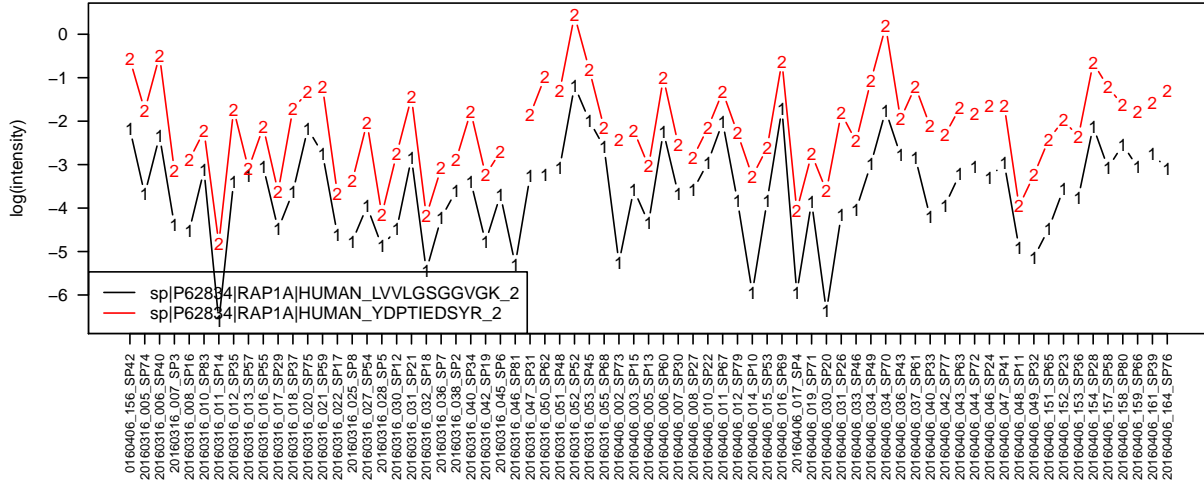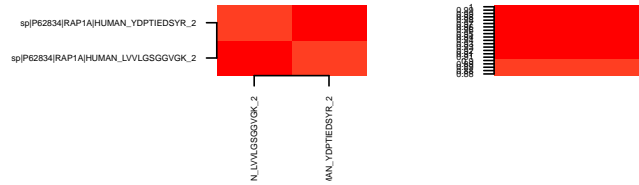

sp|P80188-1|NGAL|HUMAN

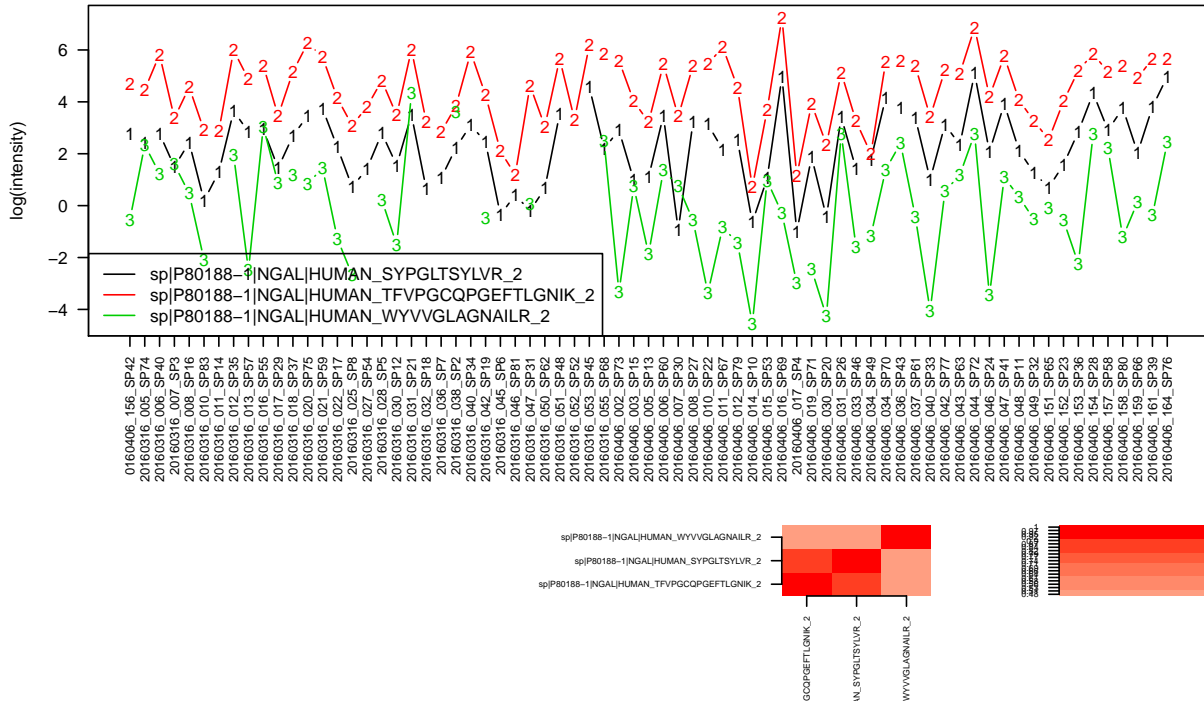

sp|Q96QR1|SG3A1|HUMAN

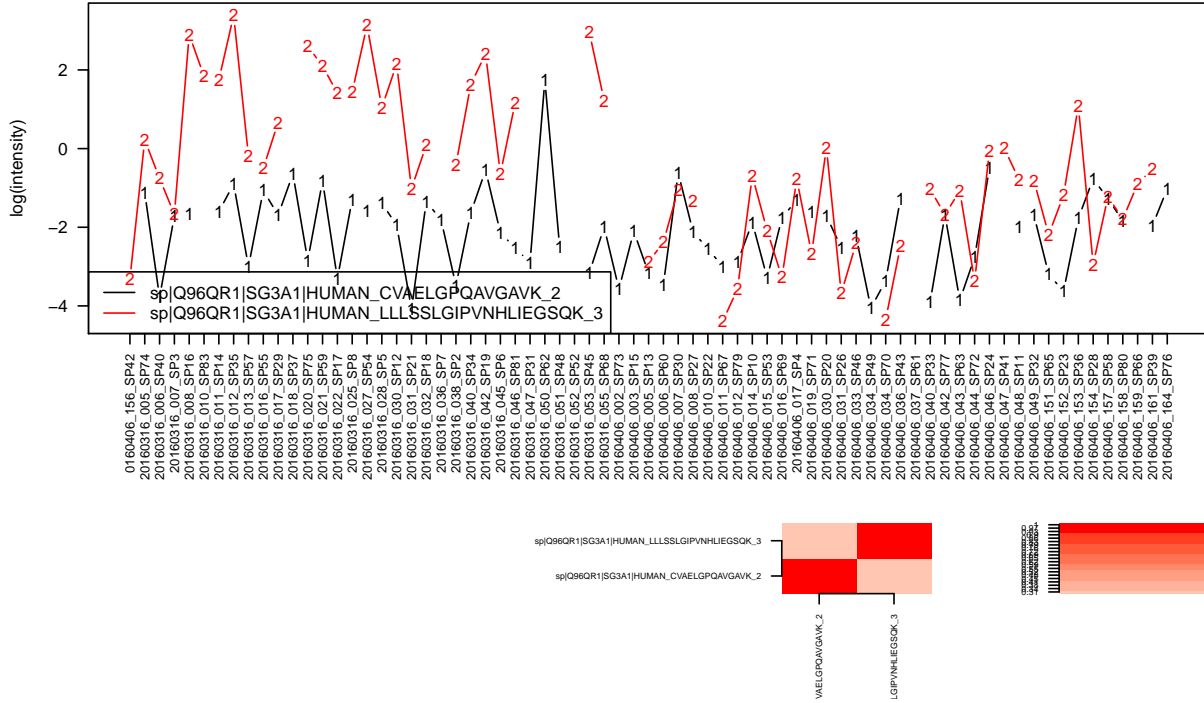

sp|Q99497|PARK7|HUMAN

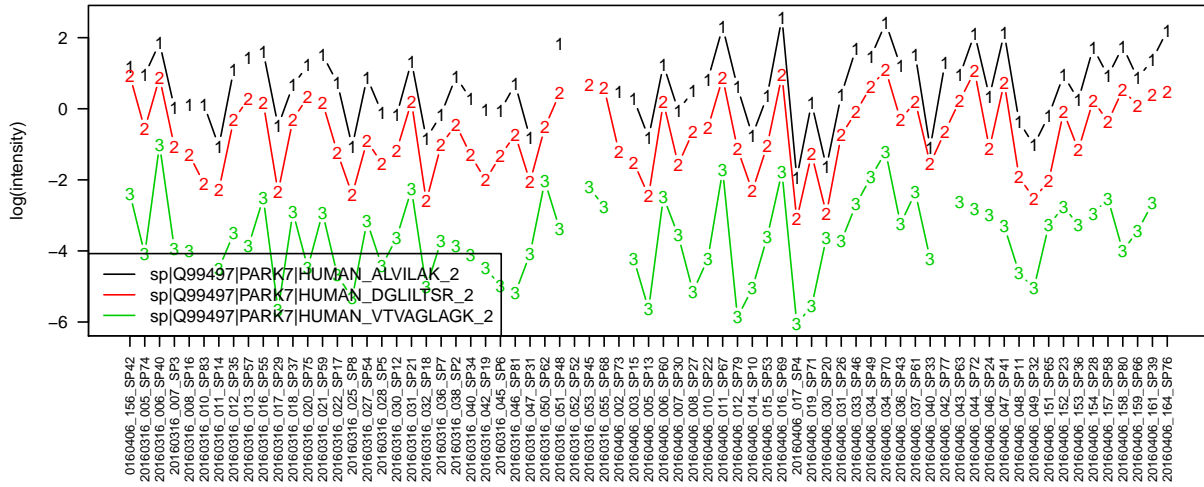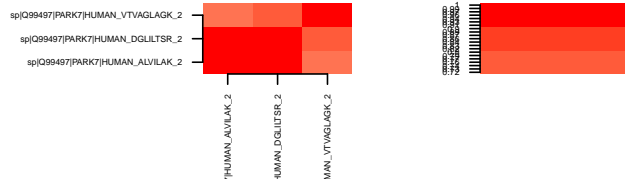

sp|Q9GZZ8|LACRT|HUMAN

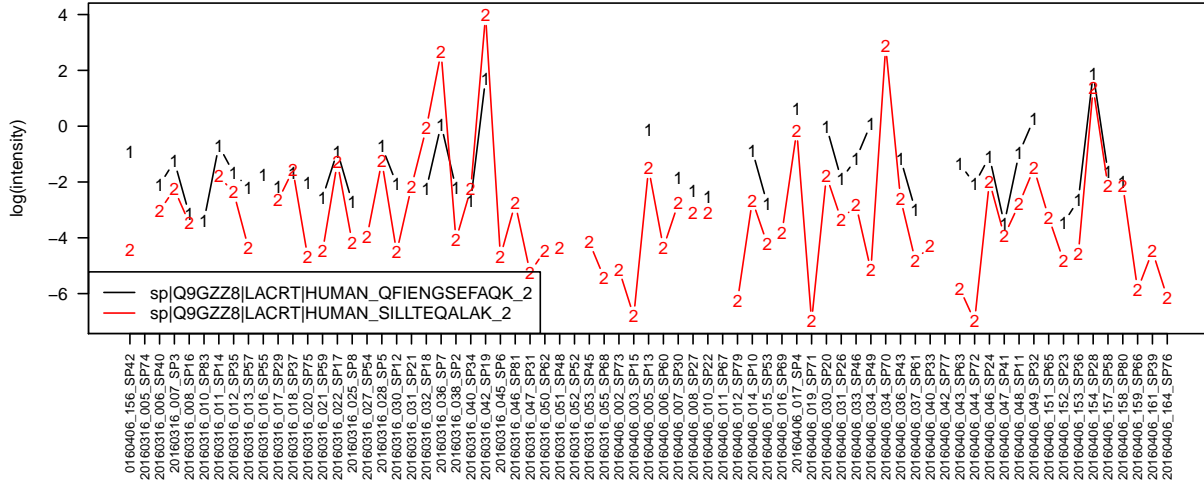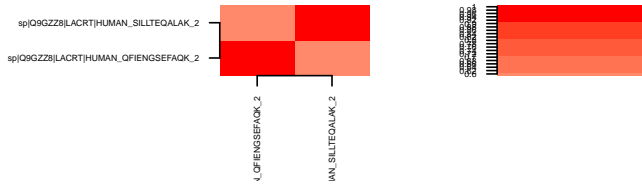

sp|Q9HC84|MUC5B|HUMAN

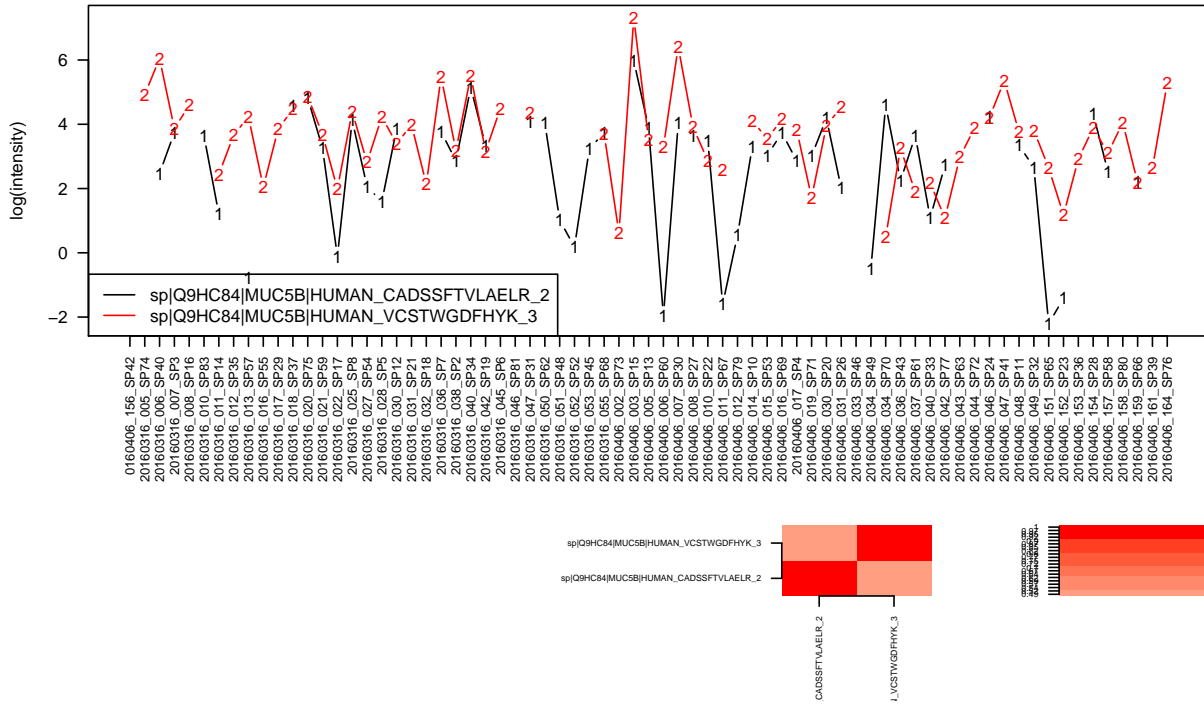

sp|Q9NQ38-3|ISK5|HUMAN

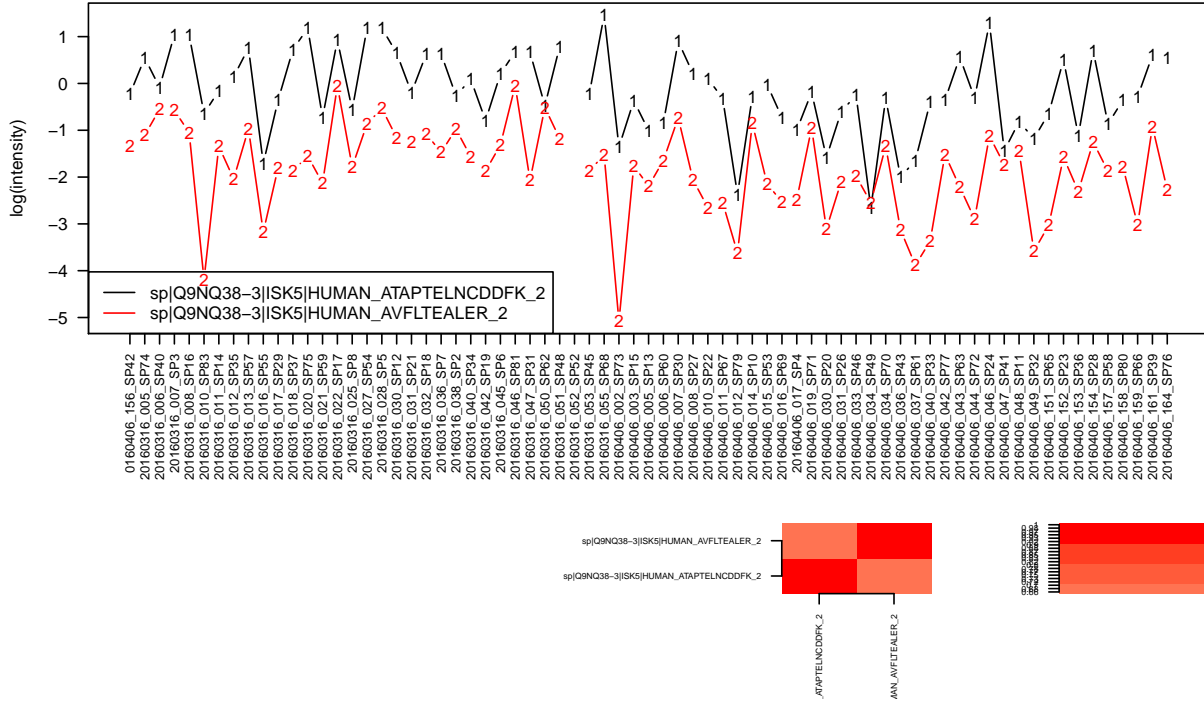



sp|Q9NZT1|CALL5|HUMAN

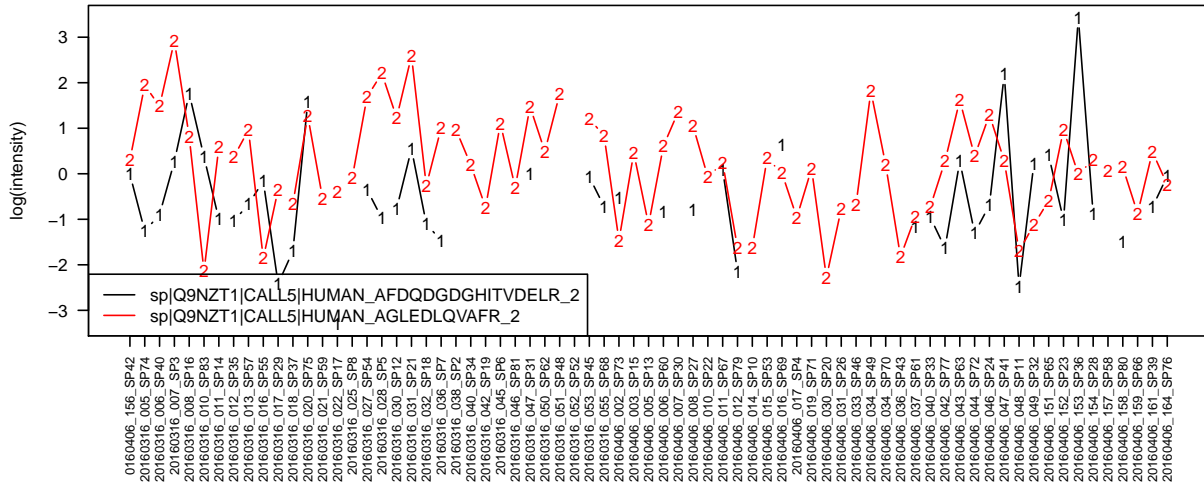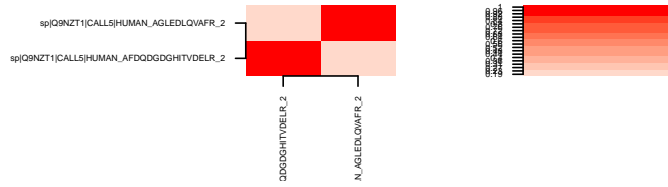

sp|Q9UHA7|IL1F6|HUMAN

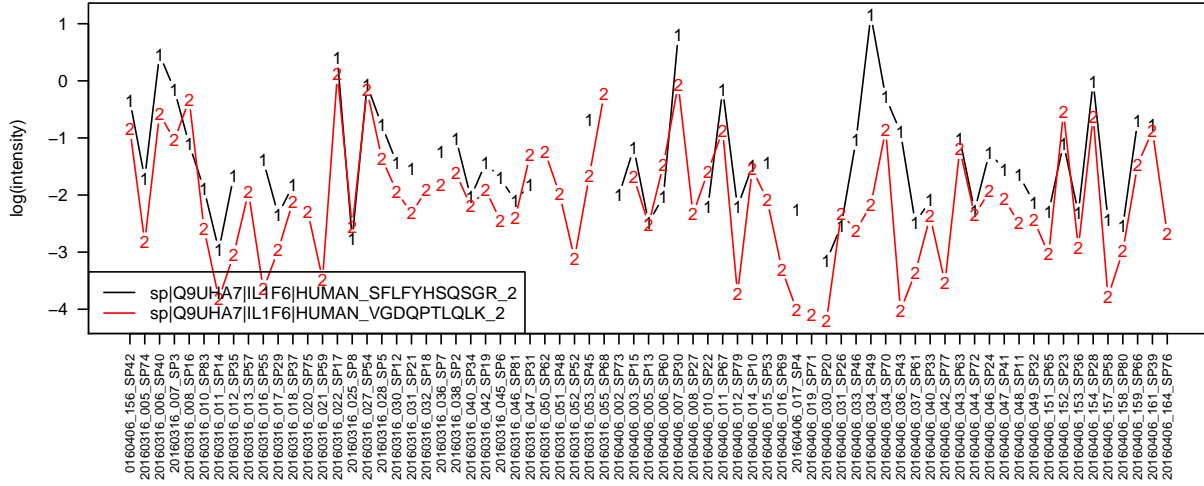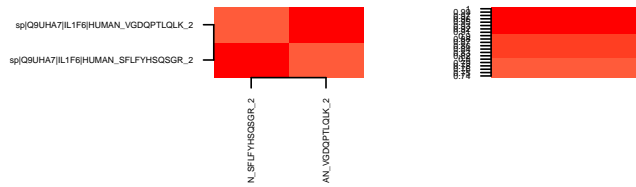

# Peptides used for quantification and their transitions

## sp|A8K2U0|A2ML1|HUMAN\_ATSIVAWLAK\_2

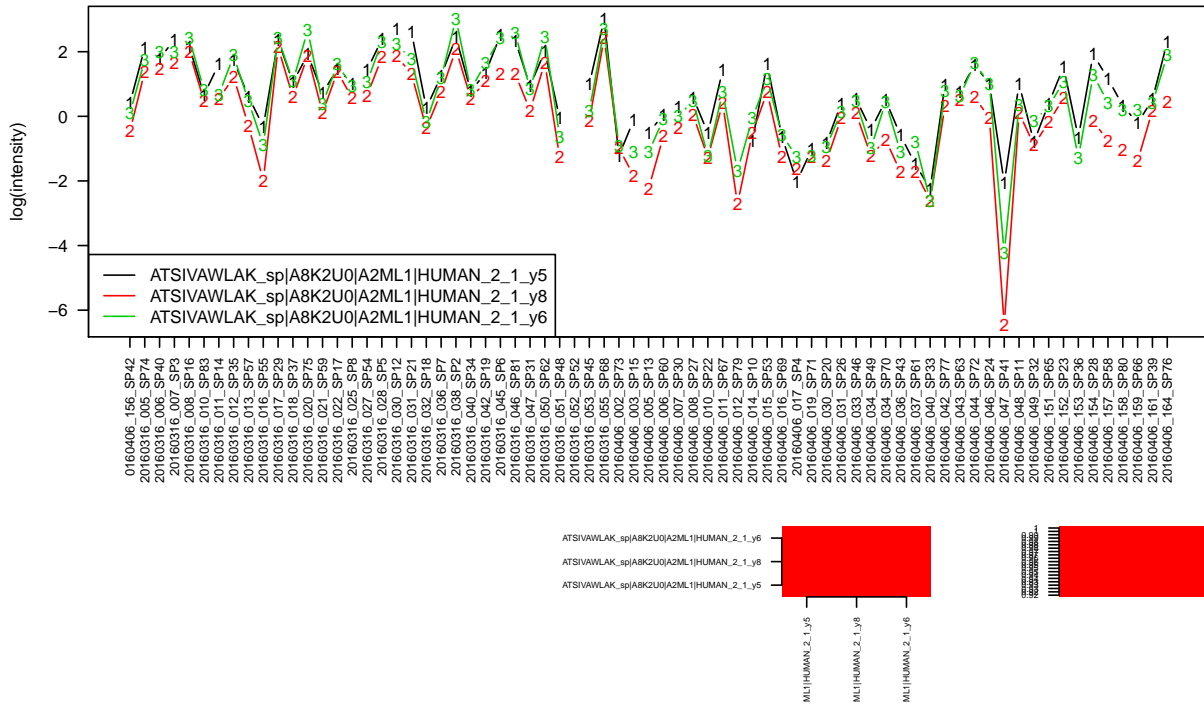

## sp|A8K2U0|A2ML1|HUMAN\_ELSTVQESFLVK\_2

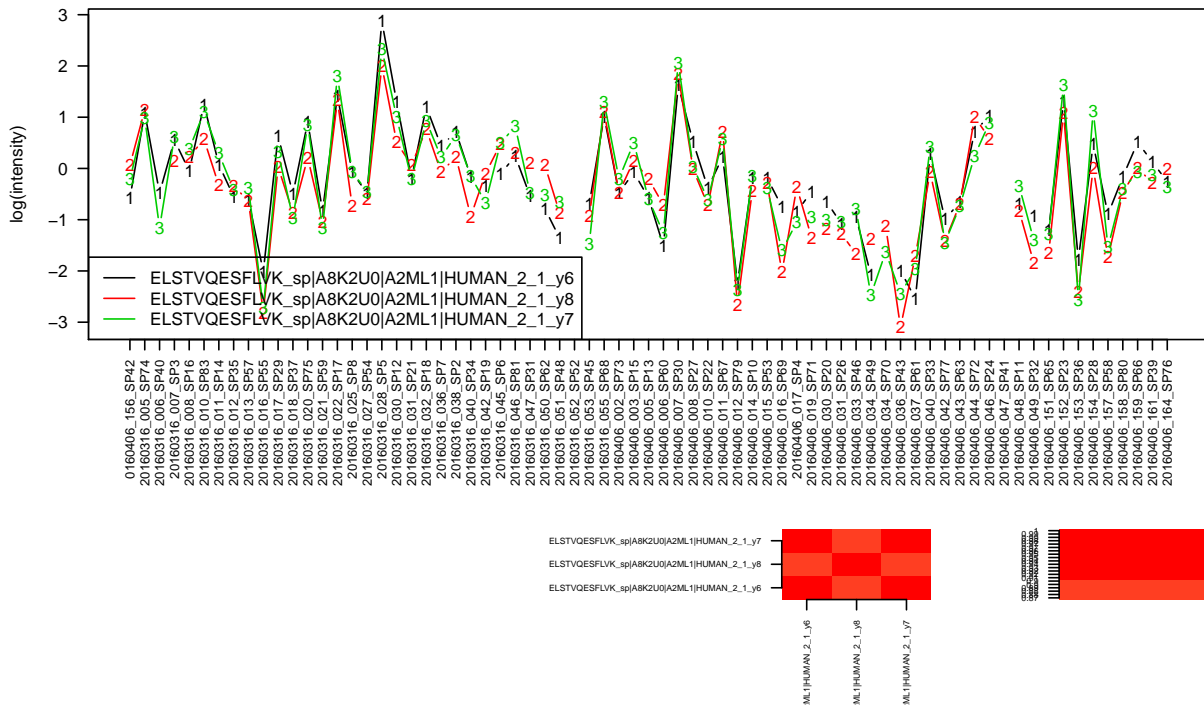

sp|A8K2U0|A2ML1|HUMAN\_VCLDLSPGYSDVK\_2

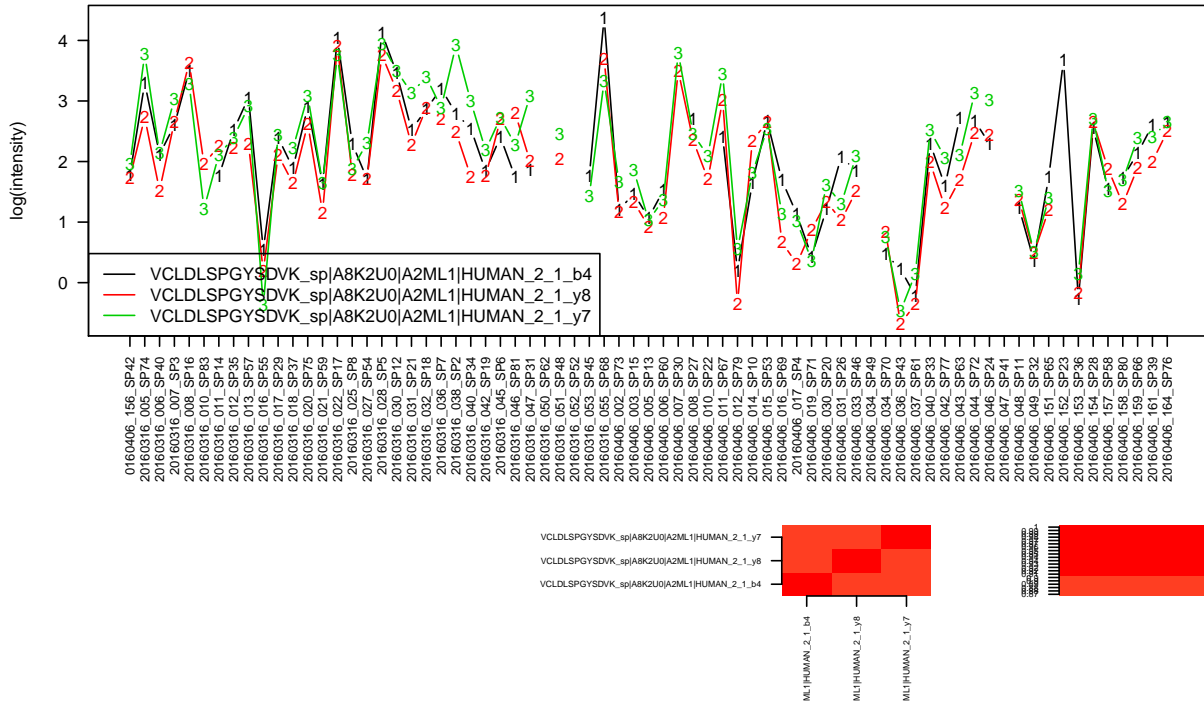

sp|O15145|ARPC3|HUMAN\_AYLQQLR\_2

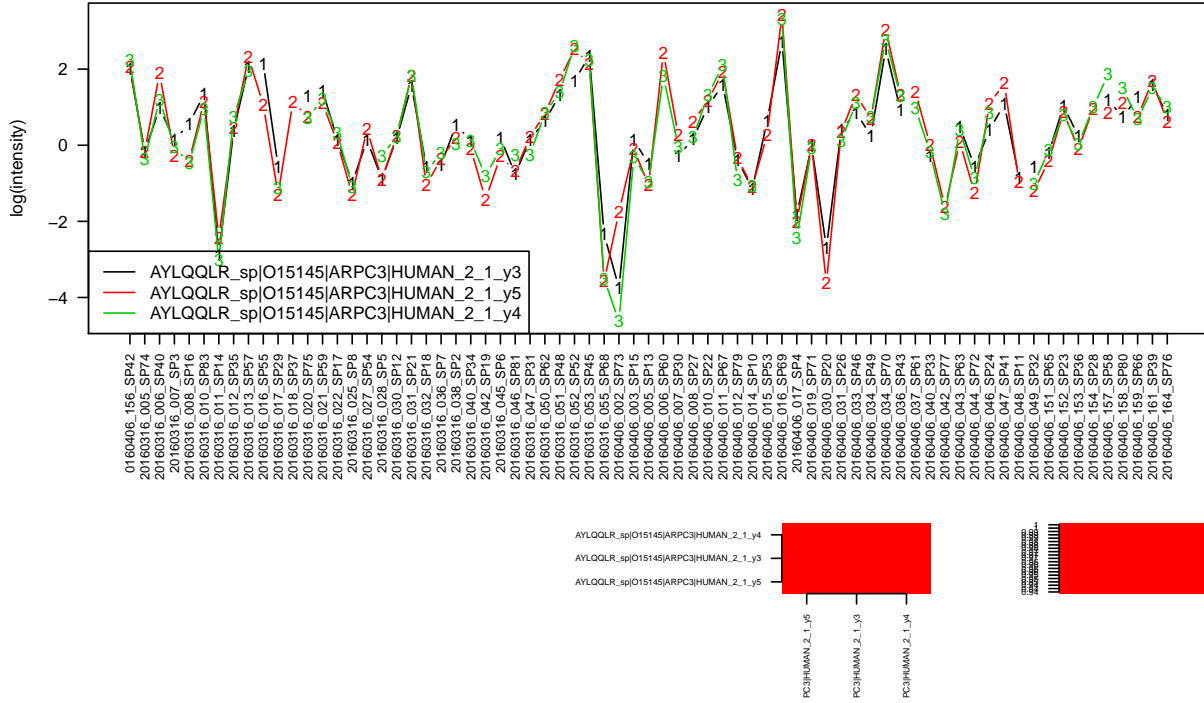

sp|O15145|ARPC3|HUMAN\_DTDIVDEAIYYFK\_2

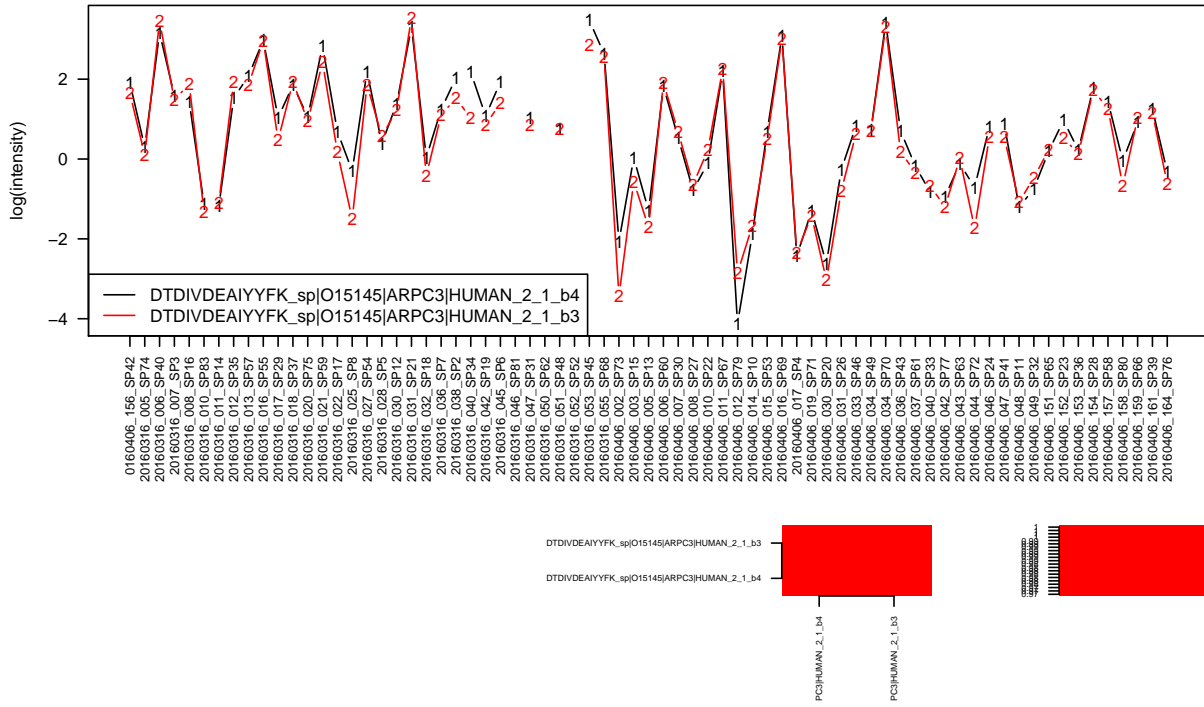

sp|O60218|AK1BA|HUMAN\_IVENIQVDFDK\_2

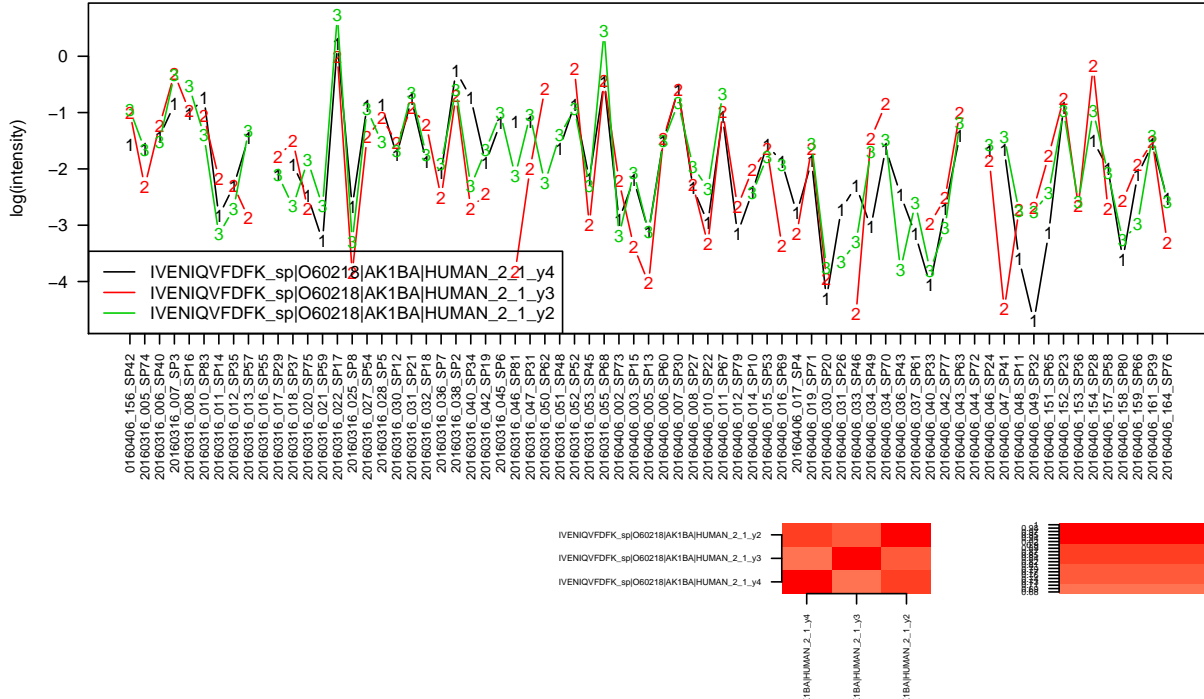

sp|O60218|AK1BA|HUMAN\_TAAQVLIR\_2

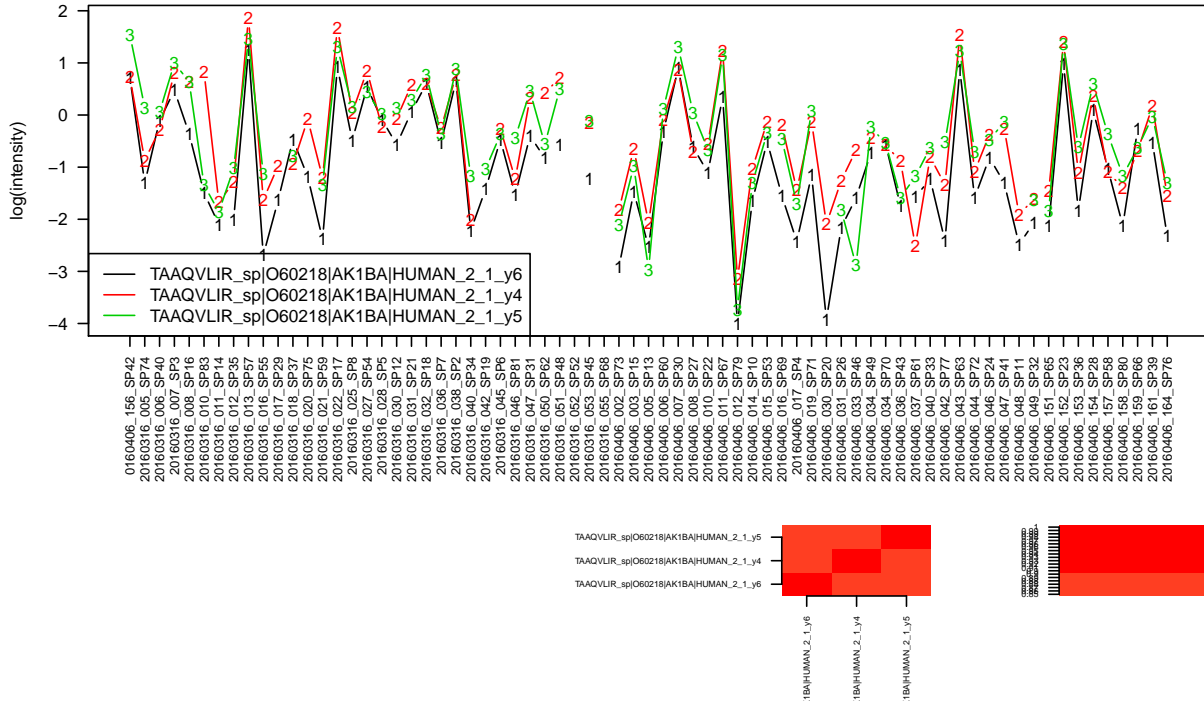

sp|P01009-1|A1AT|HUMAN\_SASLHLPK\_2

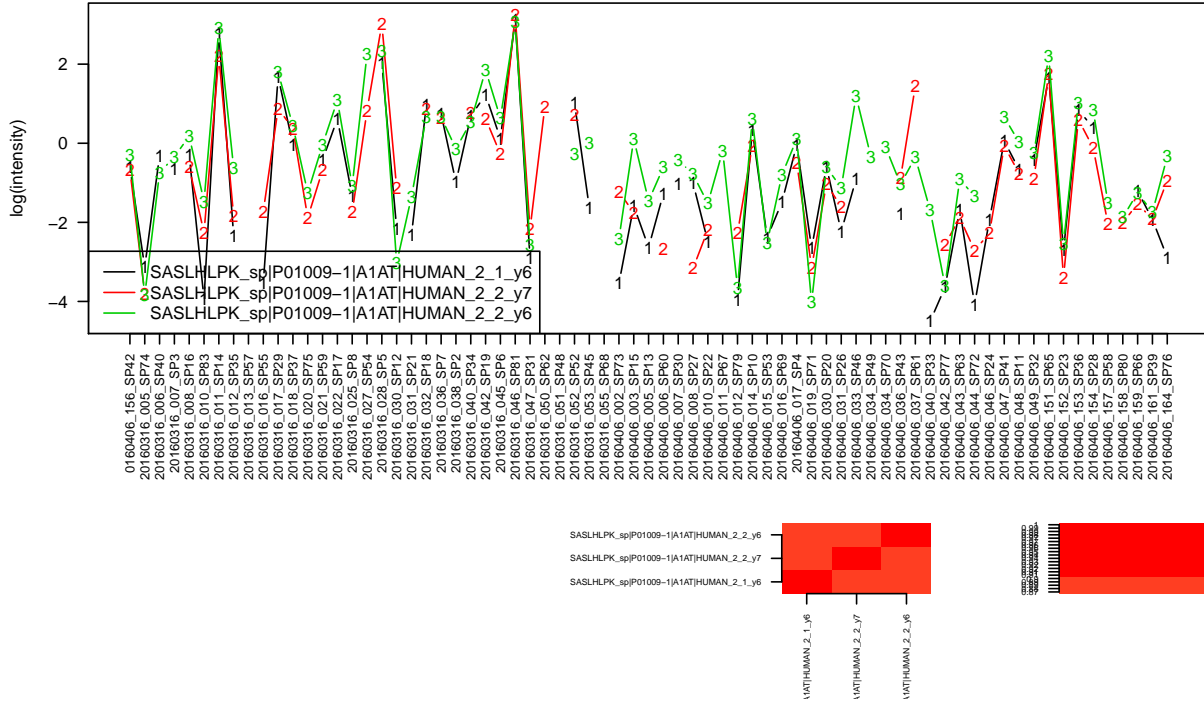

sp|P01009-1|A1AT|HUMAN\_SVLGQLGITK\_2

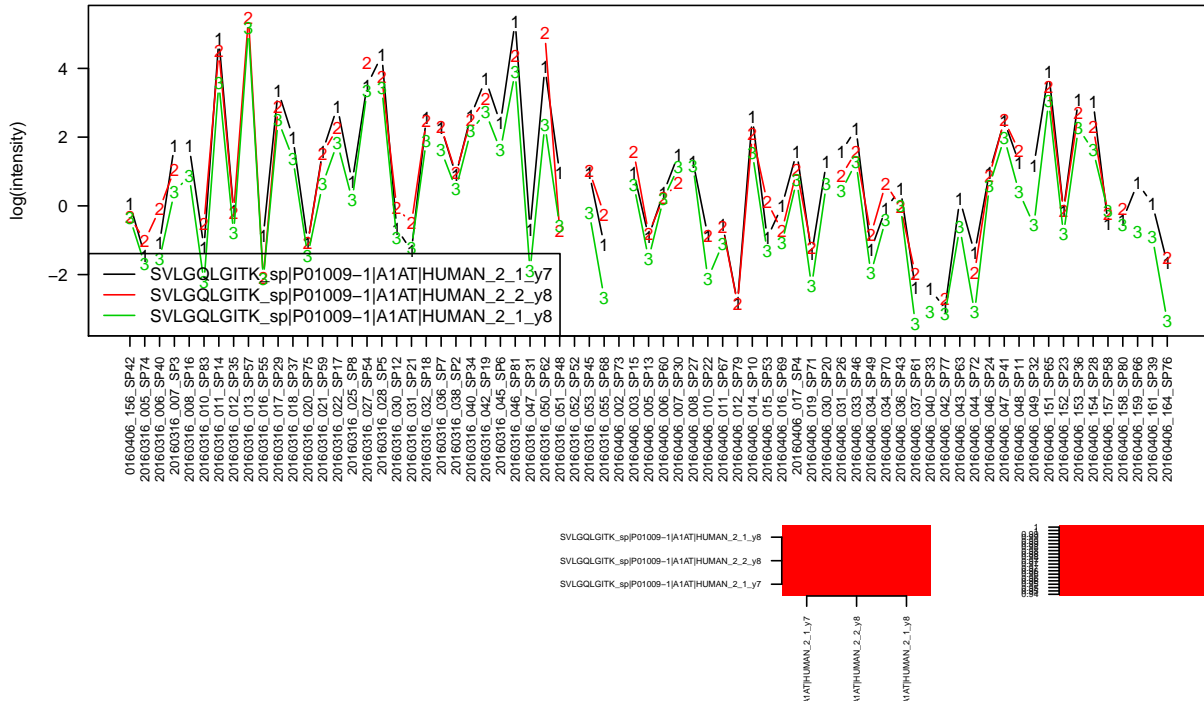

sp|P01009-1|A1AT|HUMAN\_VFSNGADLSGVTEEAPLK\_2

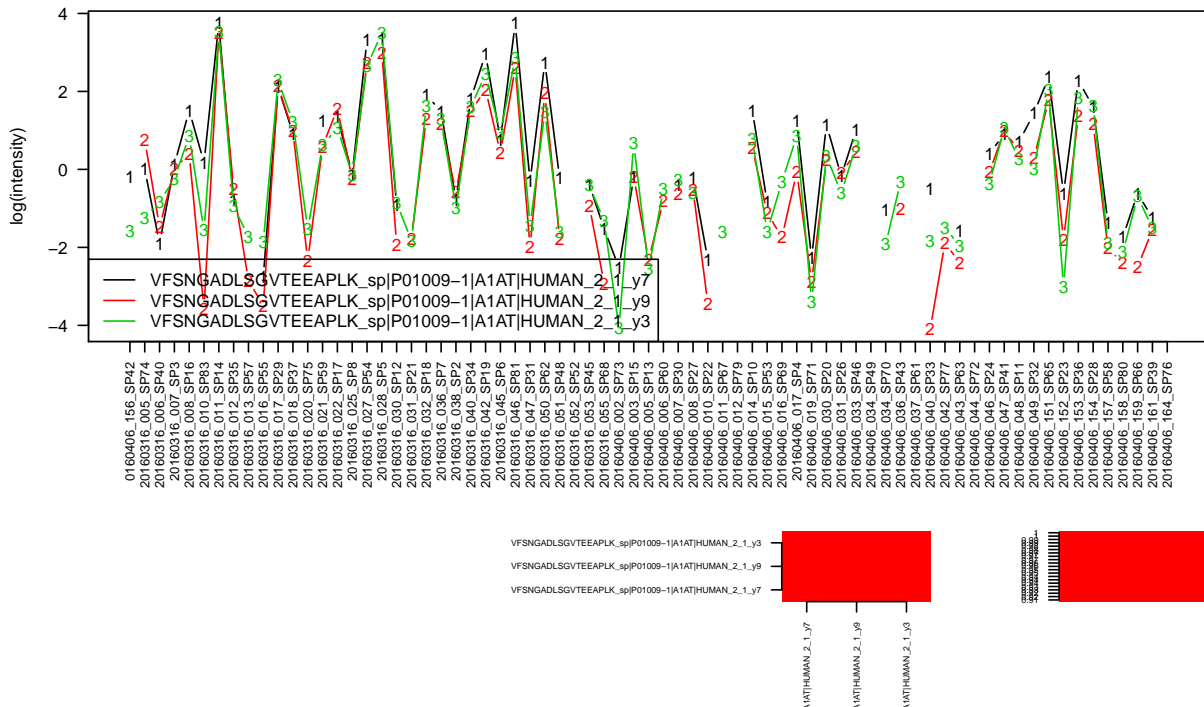

sp|P01011-1|AACT|HUMAN\_ADLSGITGAR\_2

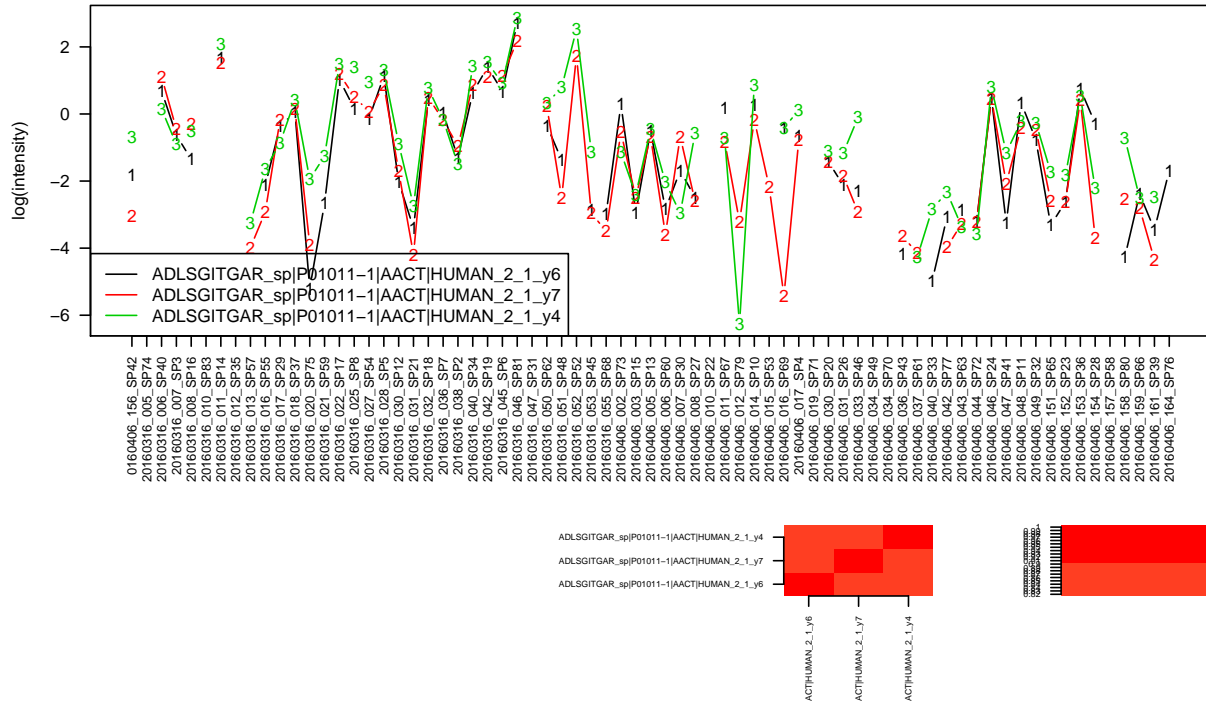

sp|P01023|A2MG|HUMAN\_AAQVTIQSSGTFSSK\_2

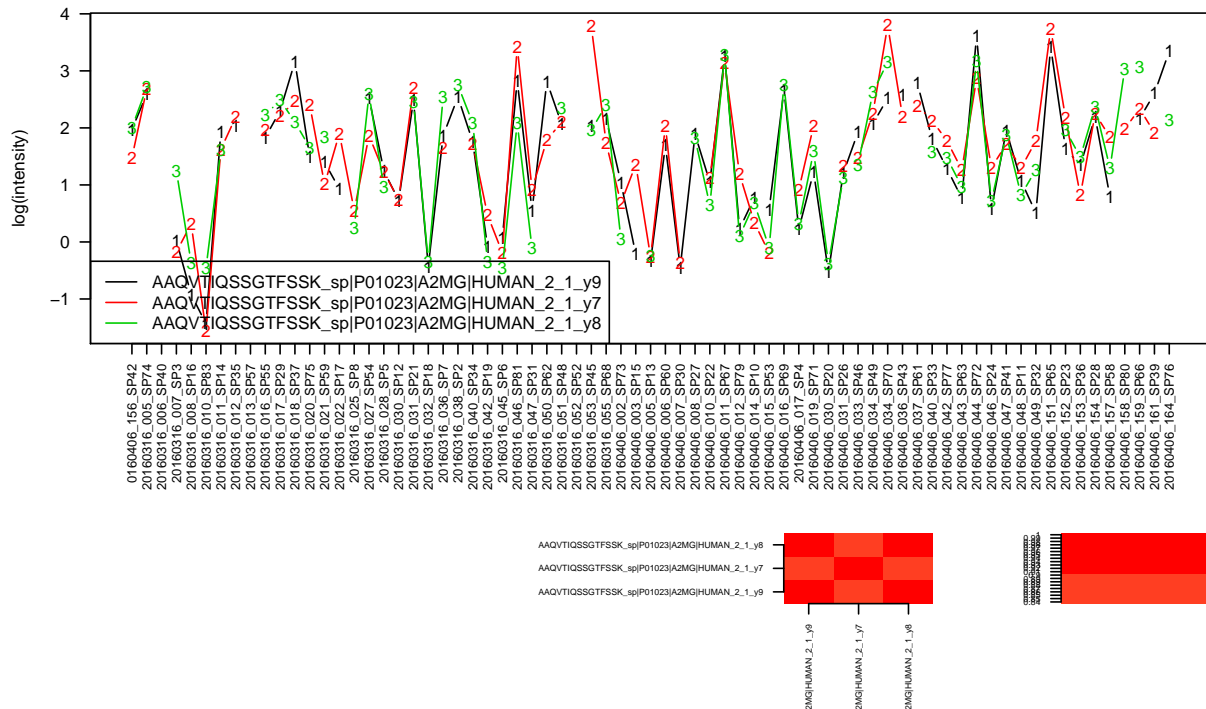

sp|P01023|A2MG|HUMAN\_NQGNTWLTAFLVK\_2

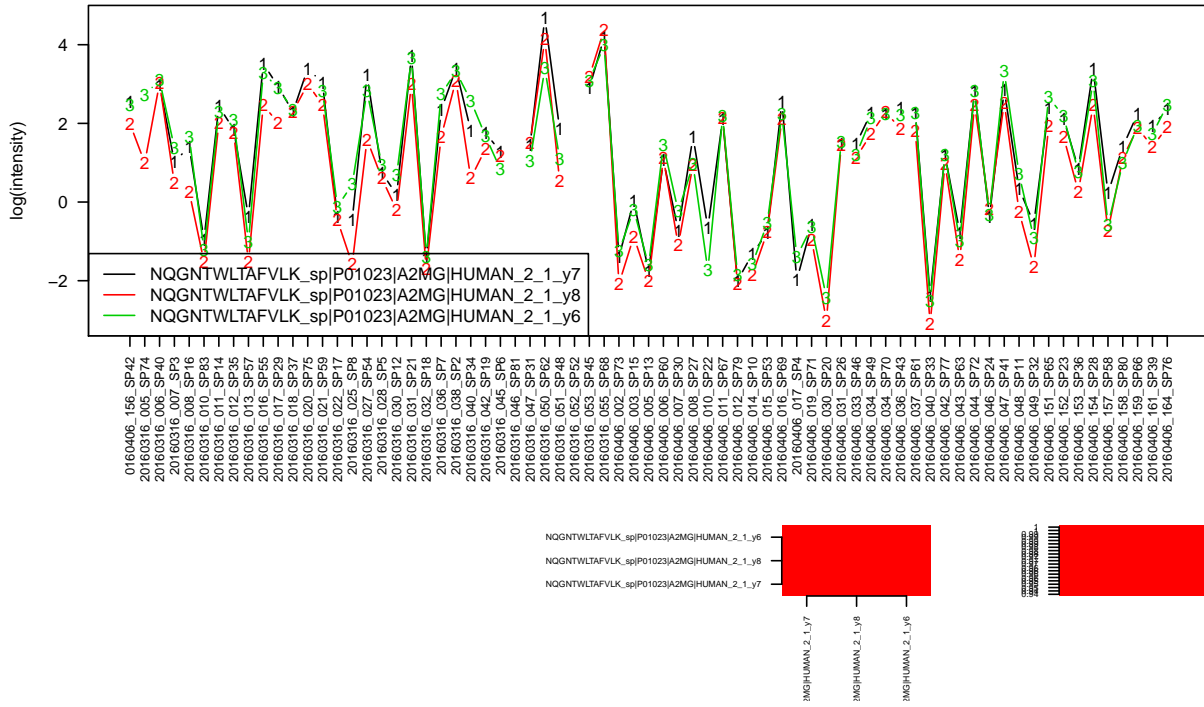

sp|P01023|A2MG|HUMAN\_VSVQLEASPAFLAVPVEK\_2

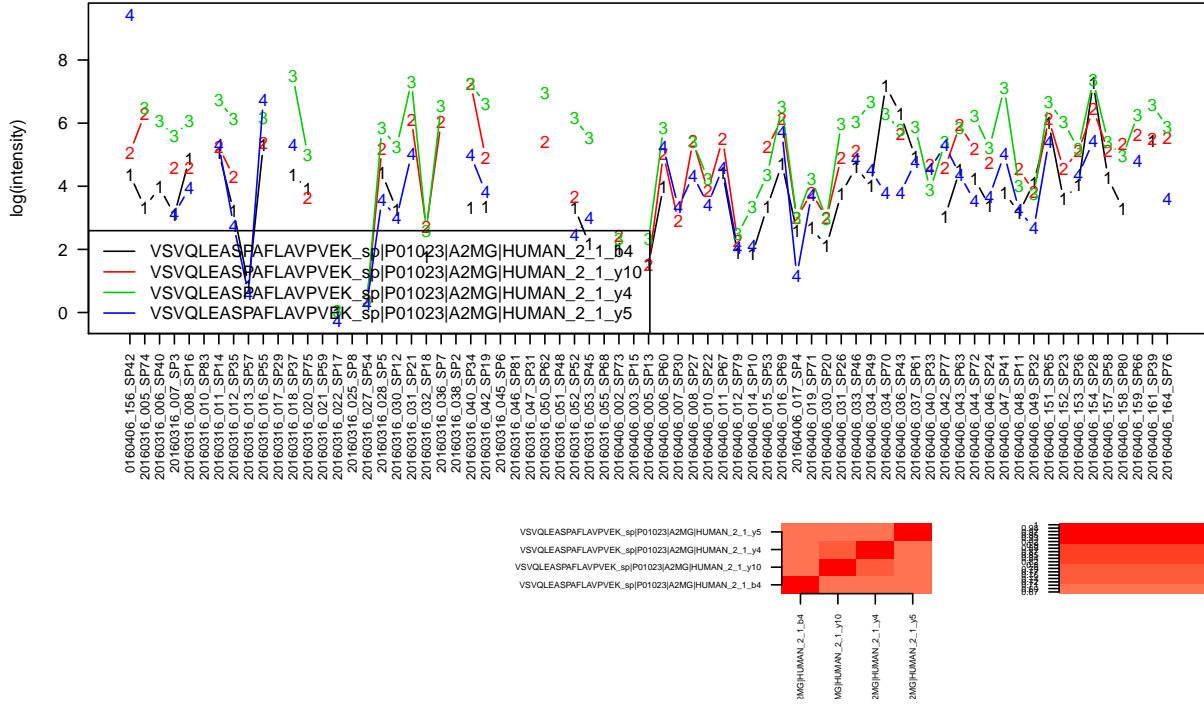



sp|P01037|CYTN|HUMAN\_ALHFAISEYNK\_2

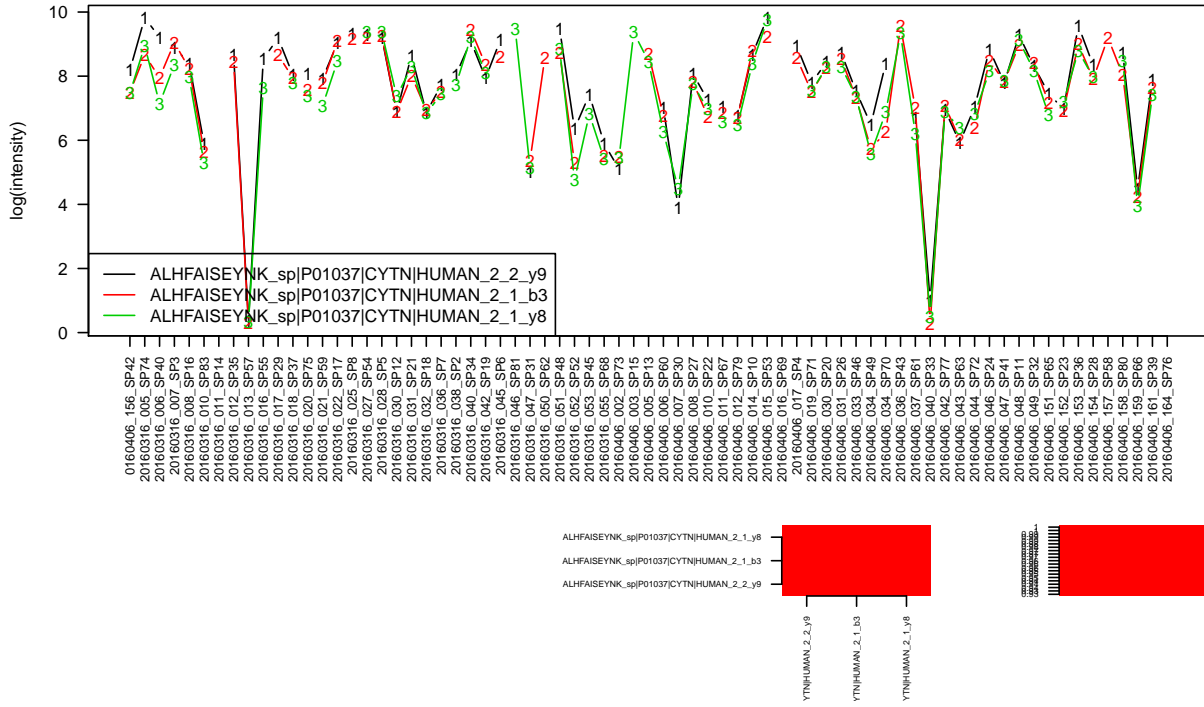

sp|P01037|CYTN|HUMAN\_IIPGGIYNADLNDEWVQR\_2

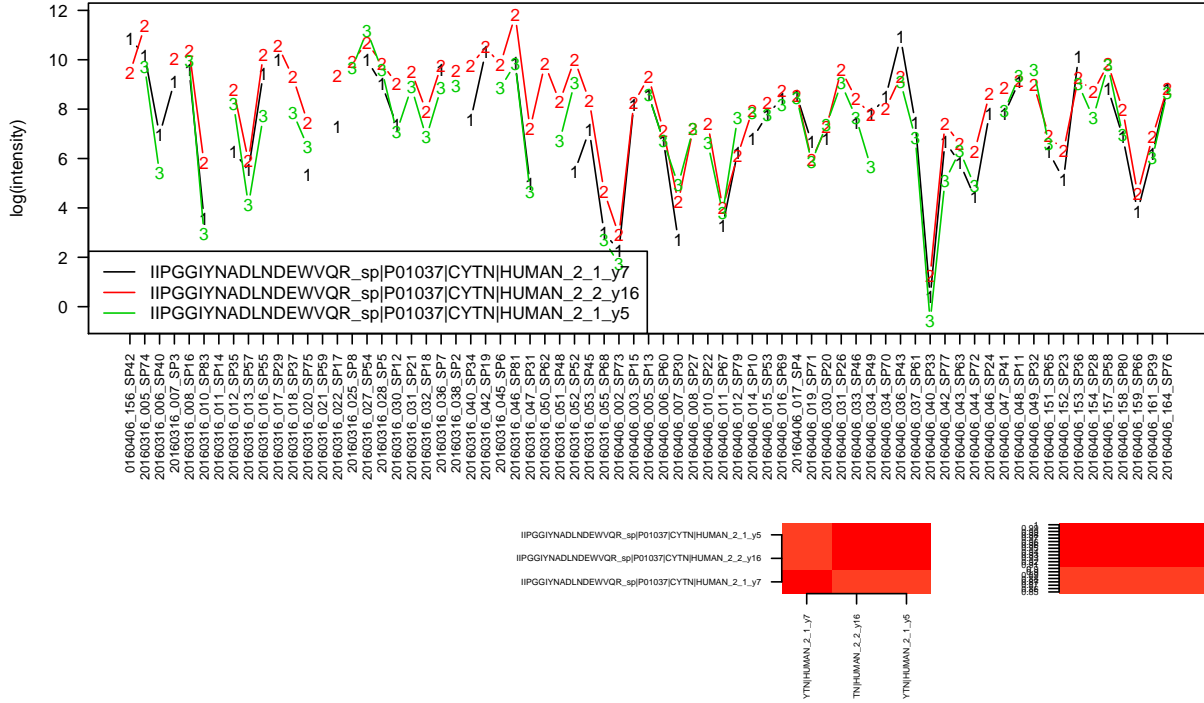

sp|P02675|FIBB|HUMAN\_DNENVVNEYSSELEK\_2

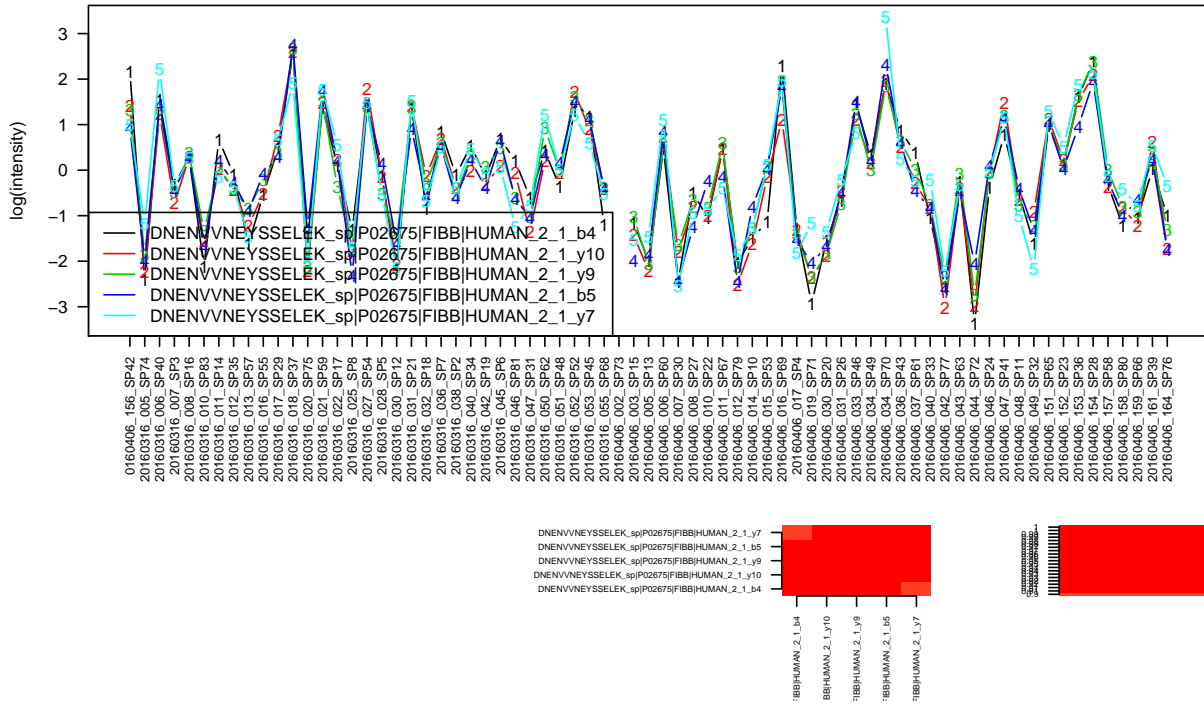

sp|P02675|FIBB|HUMAN\_EDGGGWYR\_2

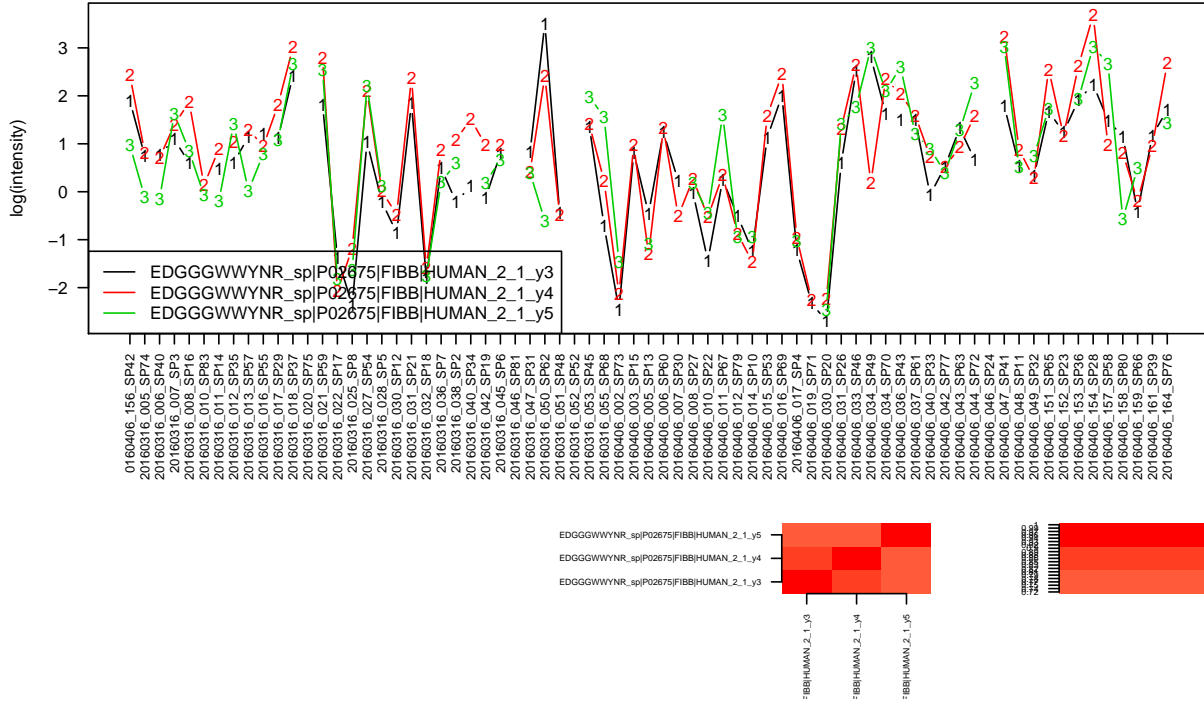

sp|P02675|FIBB|HUMAN\_QDGSVDFGR\_2

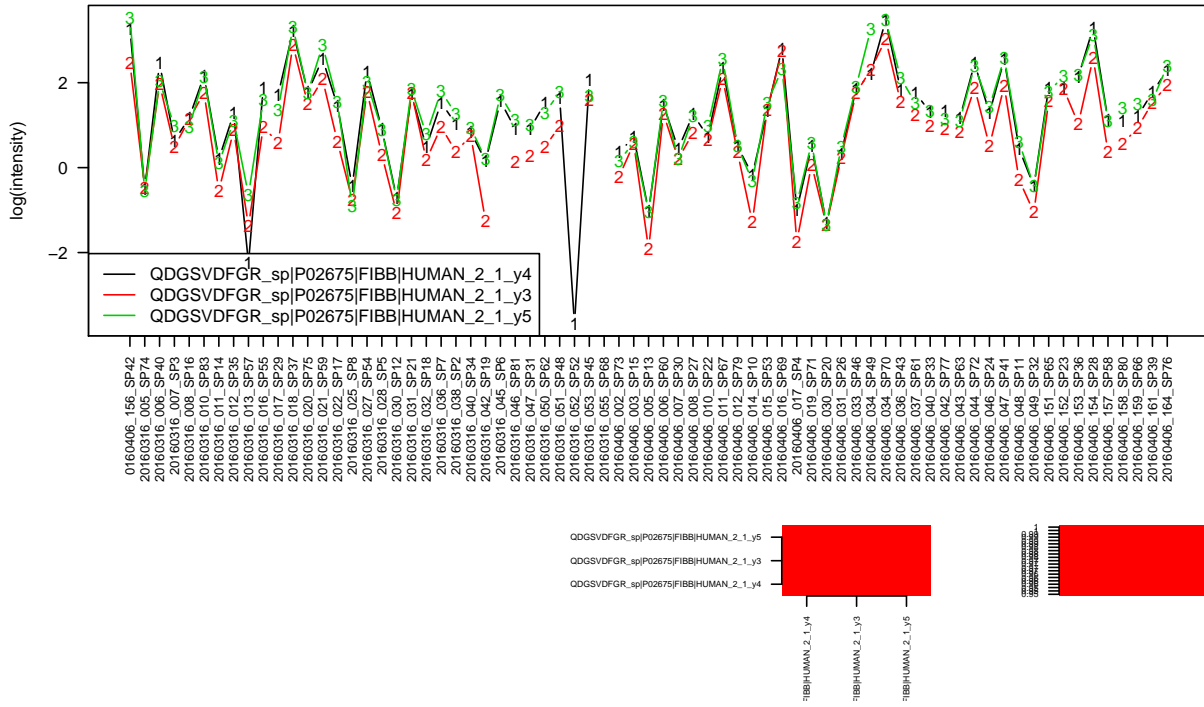

sp|P02730|B3AT|HUMAN\_LSPVDGFK\_2

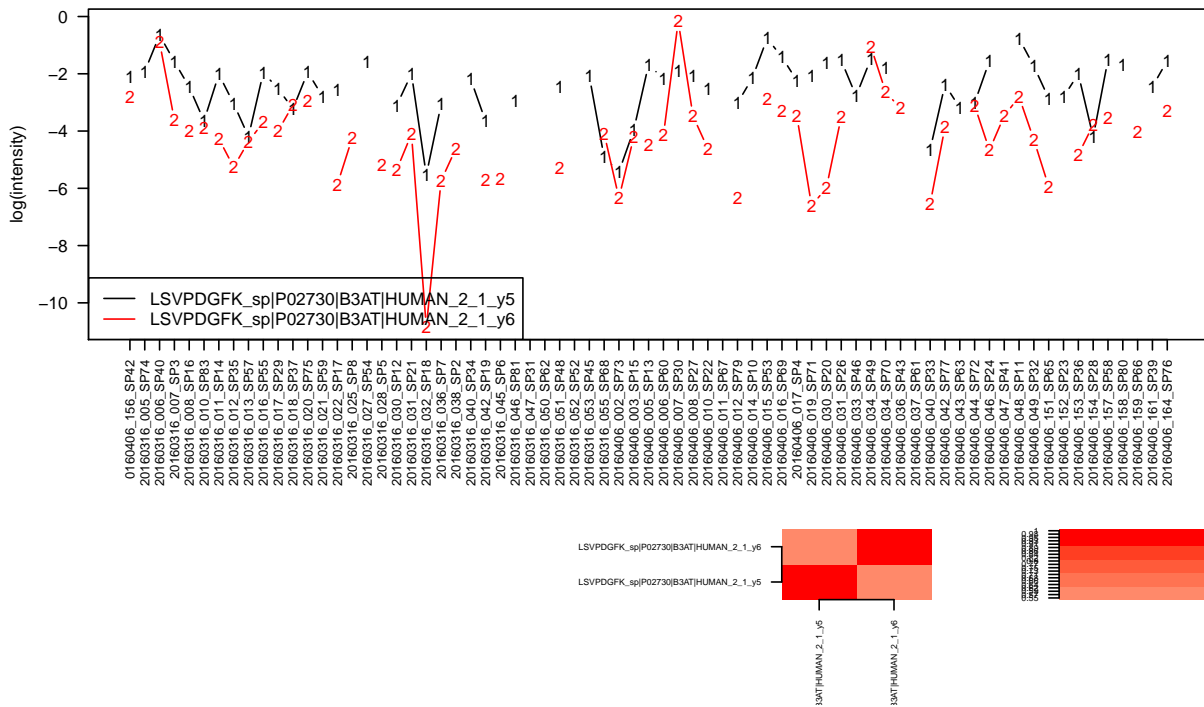

sp|P02790|HEMO|HUMAN\_QGHNSVFLIK\_3

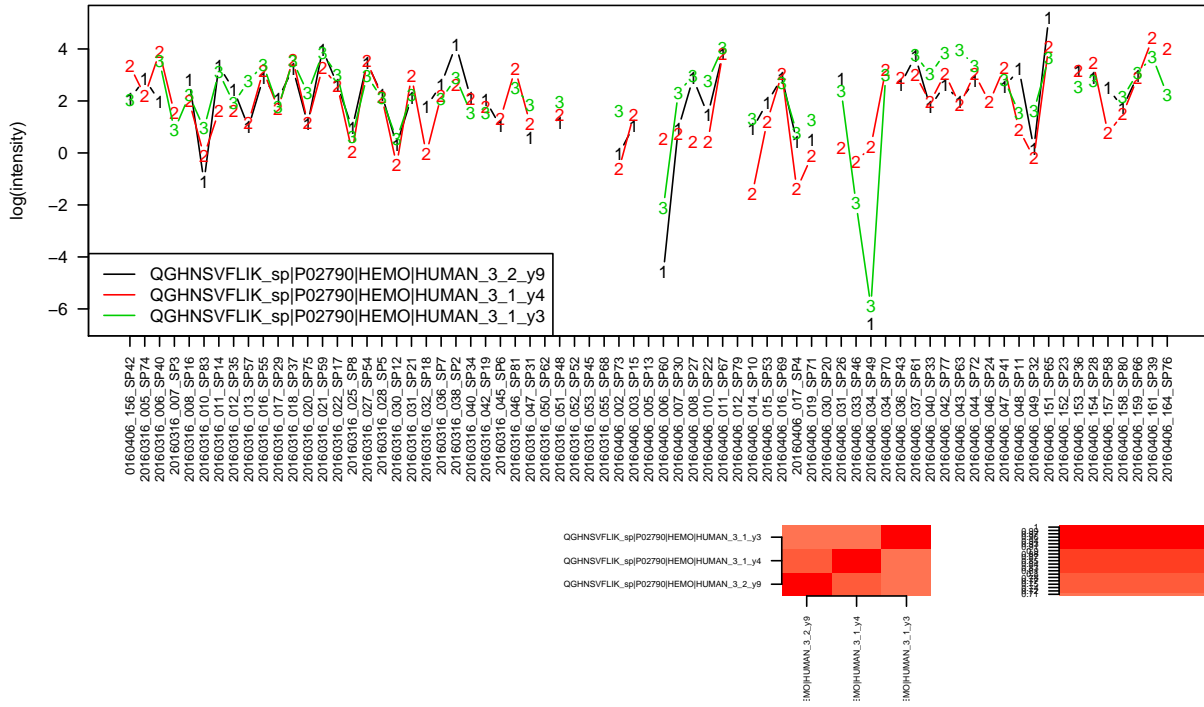

sp|P02790|HEMO|HUMAN\_SGAQATWTLPWPHEK\_3

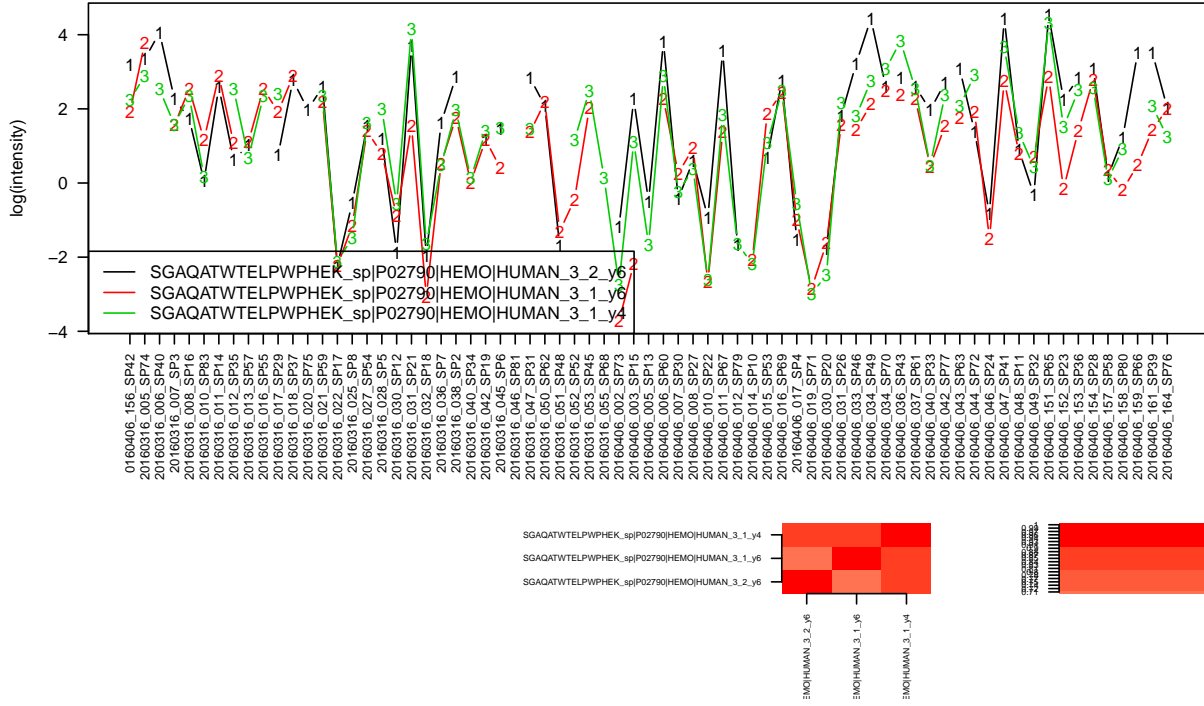

sp|P02790|HEMO|HUMAN\_VWVYPPEK\_2

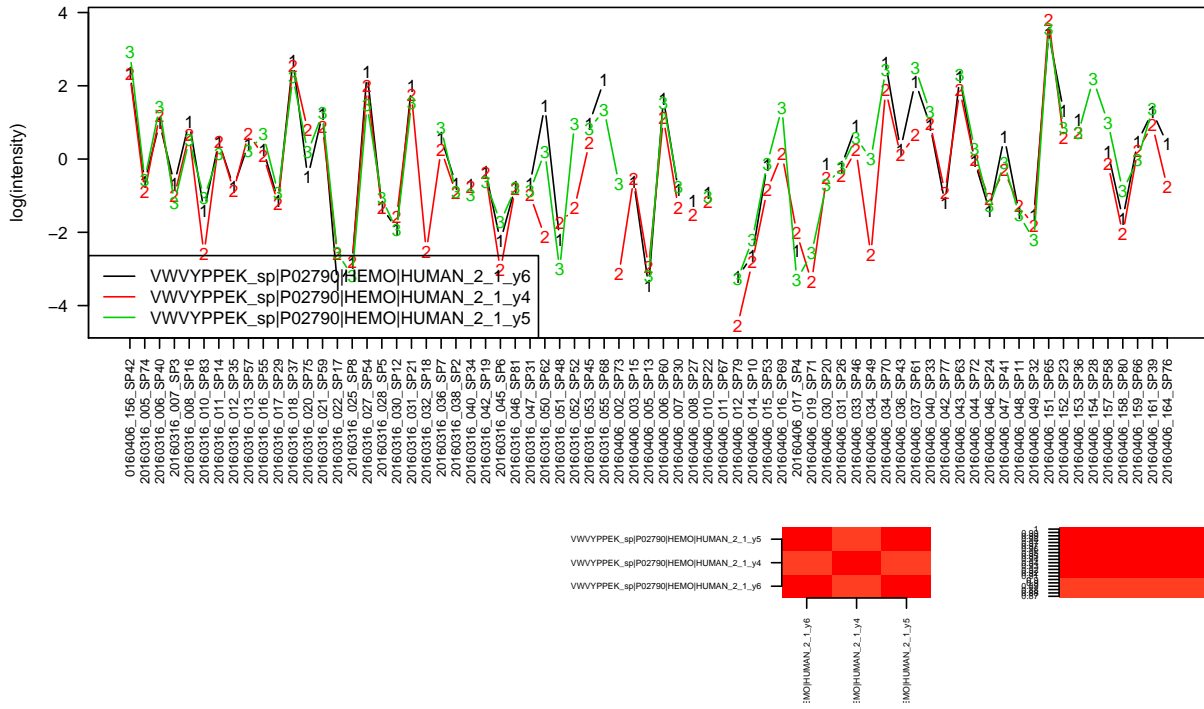

sp|P03973|SLPI|HUMAN\_CLDPVDTNPTR\_2

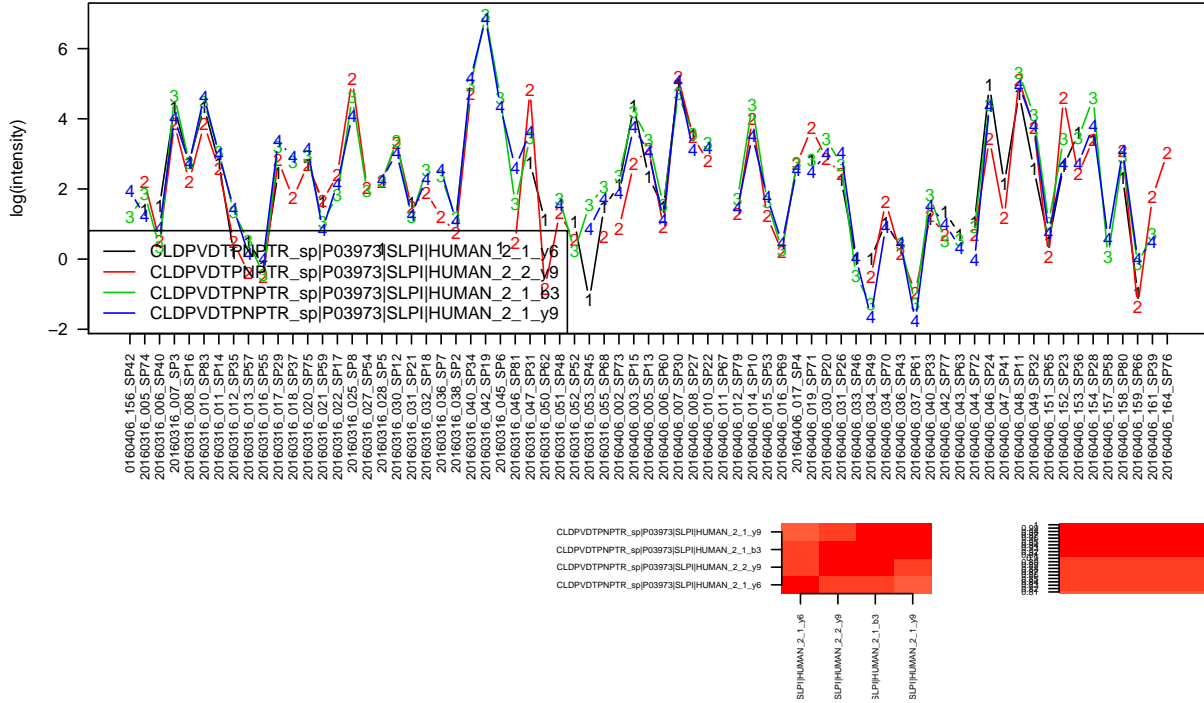

sp|P04792|HSPB1|HUMAN\_LATQSNEITIPVTFESR\_2

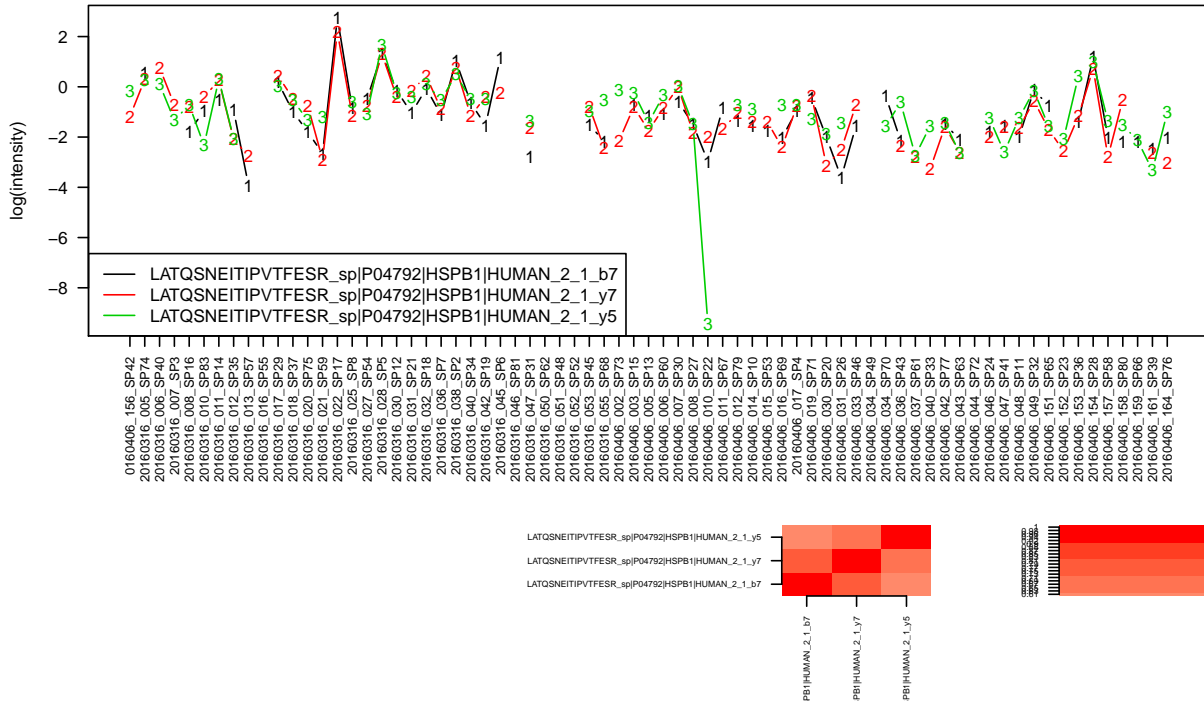

sp|P04792|HSPB1|HUMAN\_LFDQAFGLPR\_2

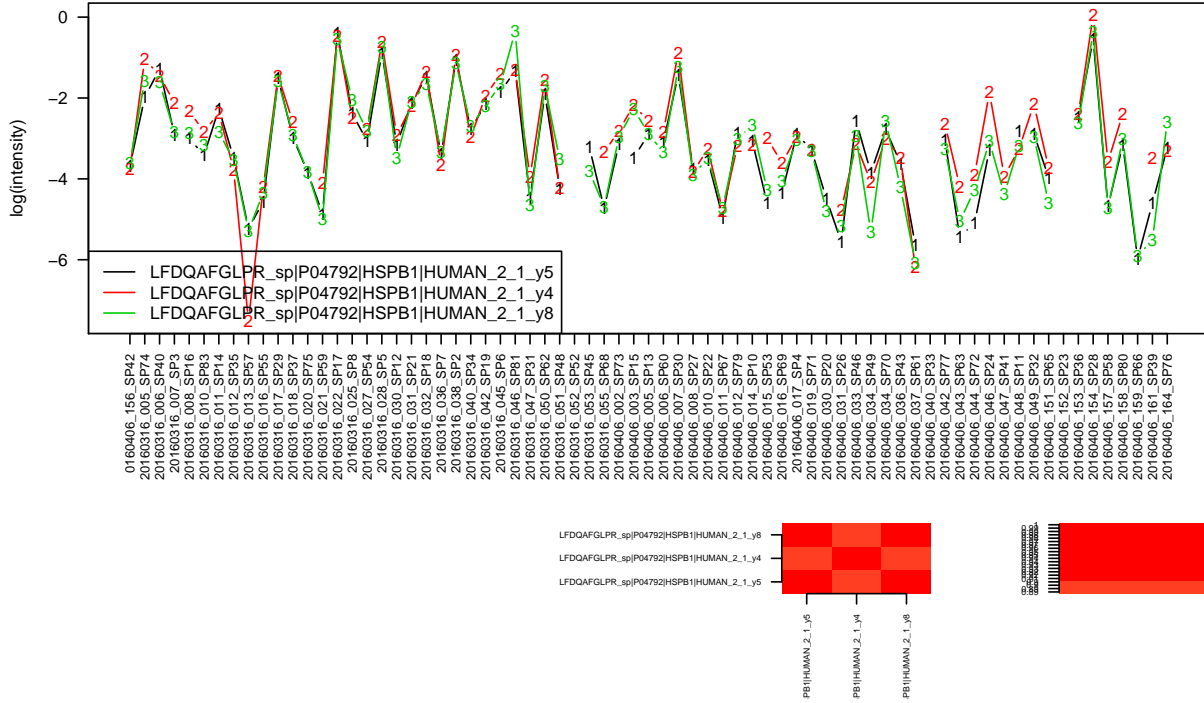

sp|P06733-1|ENOA|HUMAN\_IGAEVYHNLK\_2

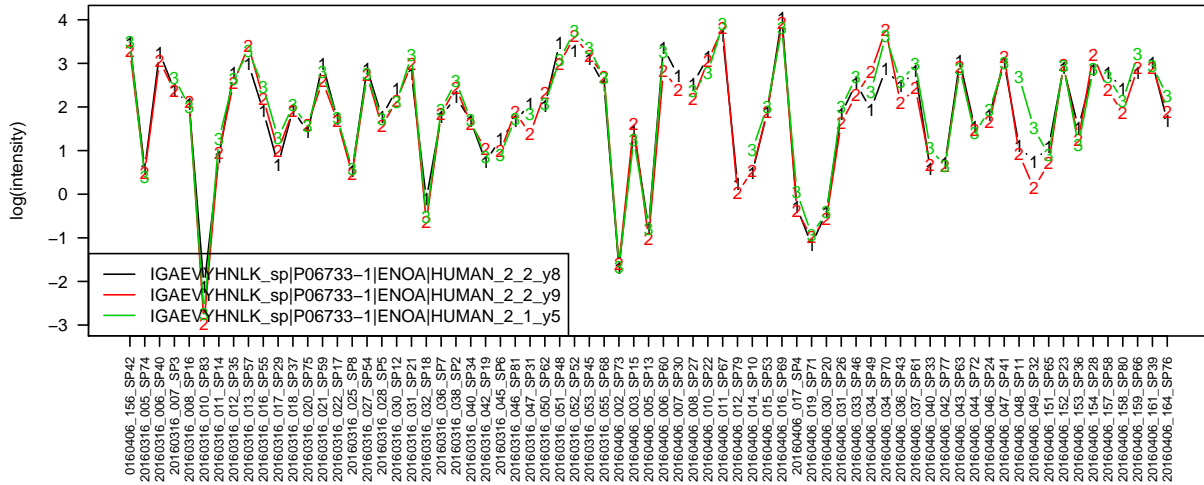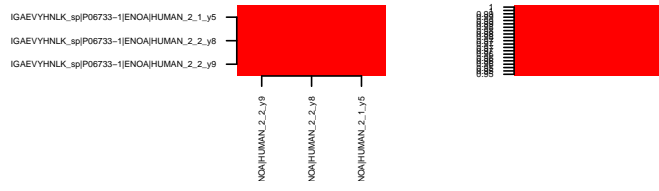

sp|P06733-1|ENOA|HUMAN\_YISPDQLADLYK\_2

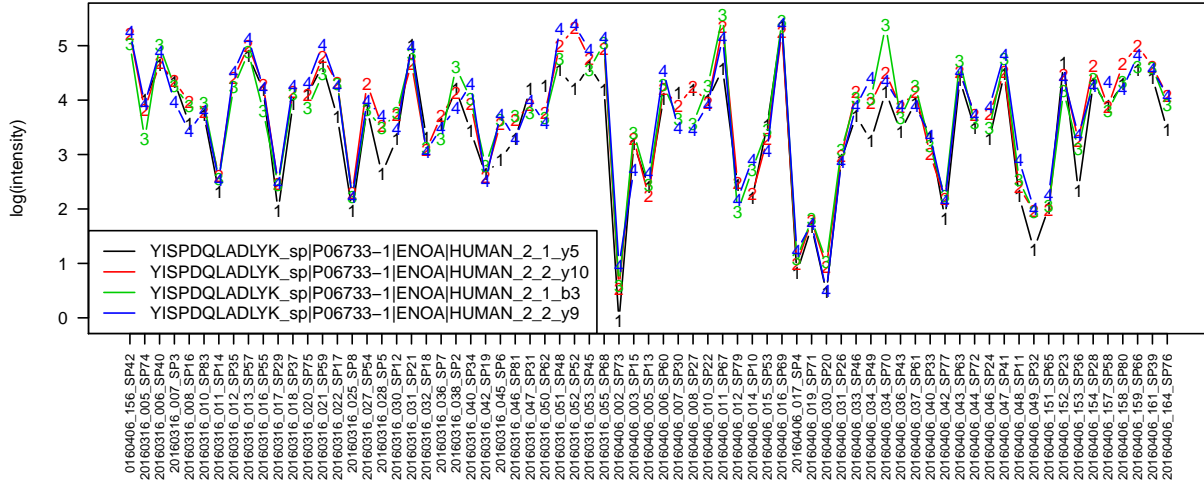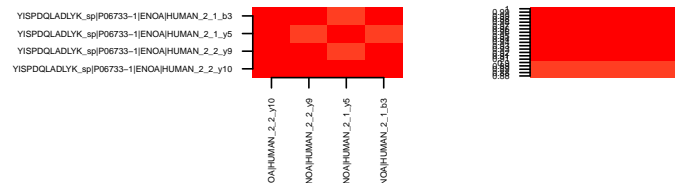

sp|P07737|PROF1|HUMAN\_DSPSVWAAVPGK\_2

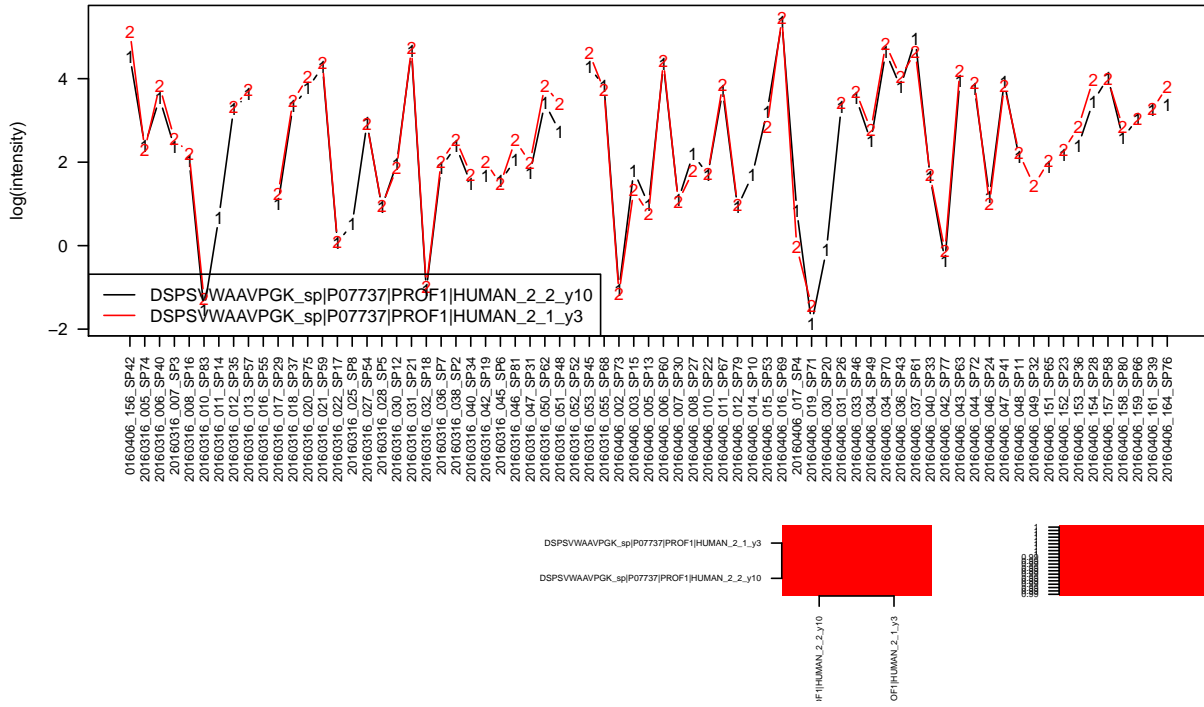

sp|P07737|PROF1|HUMAN\_SSFYVNGTLGGQK\_2

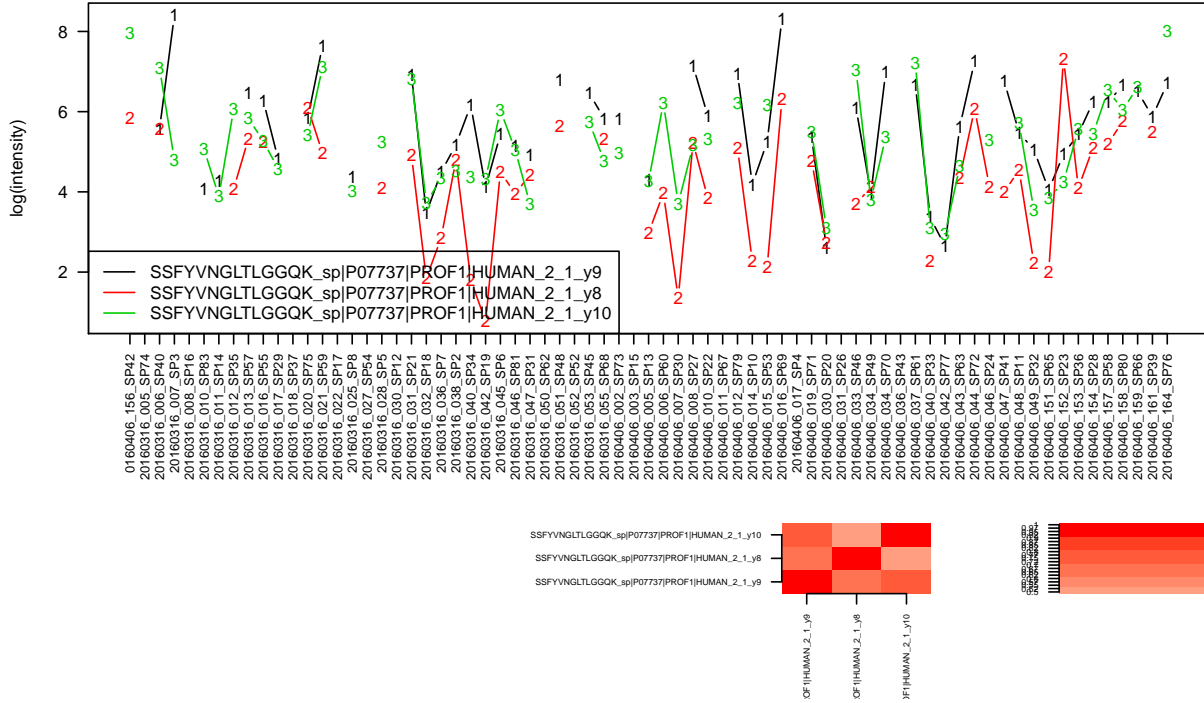



sp|P07737|PROF1|HUMAN\_TFVNITPAEVLVVGK\_2

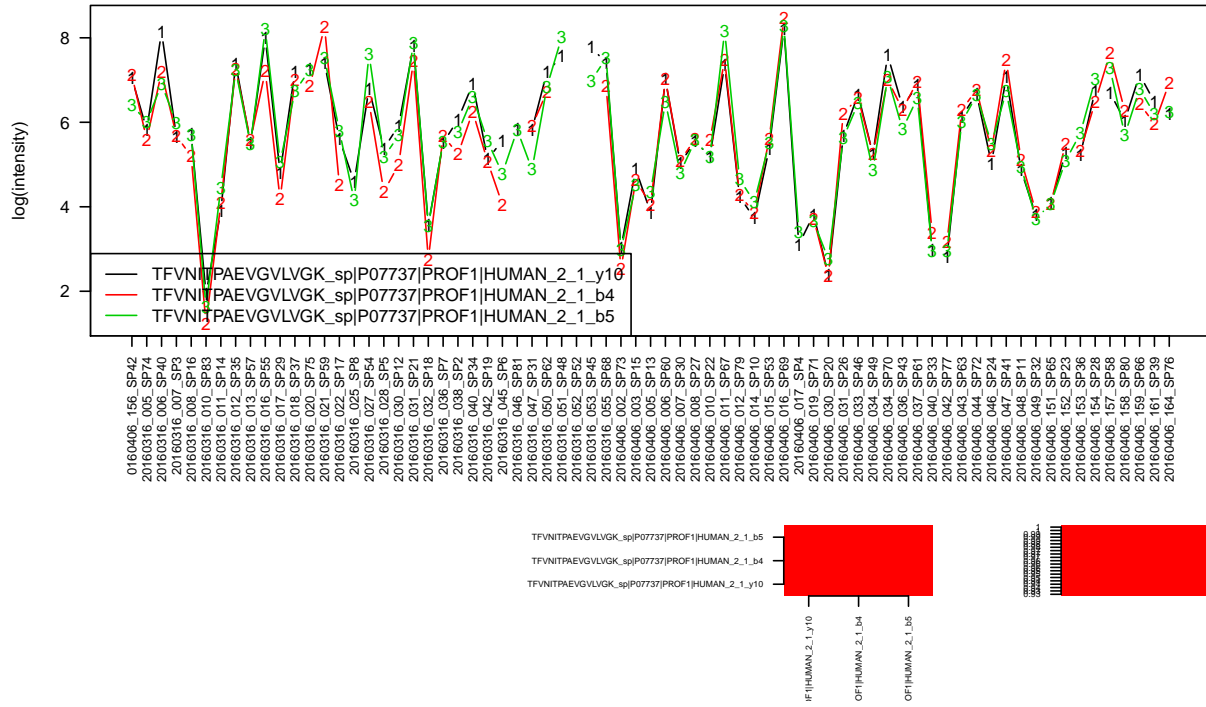

sp|P08571|CD14|HUMAN\_LTVGAAQVPAQLLVGALR\_3

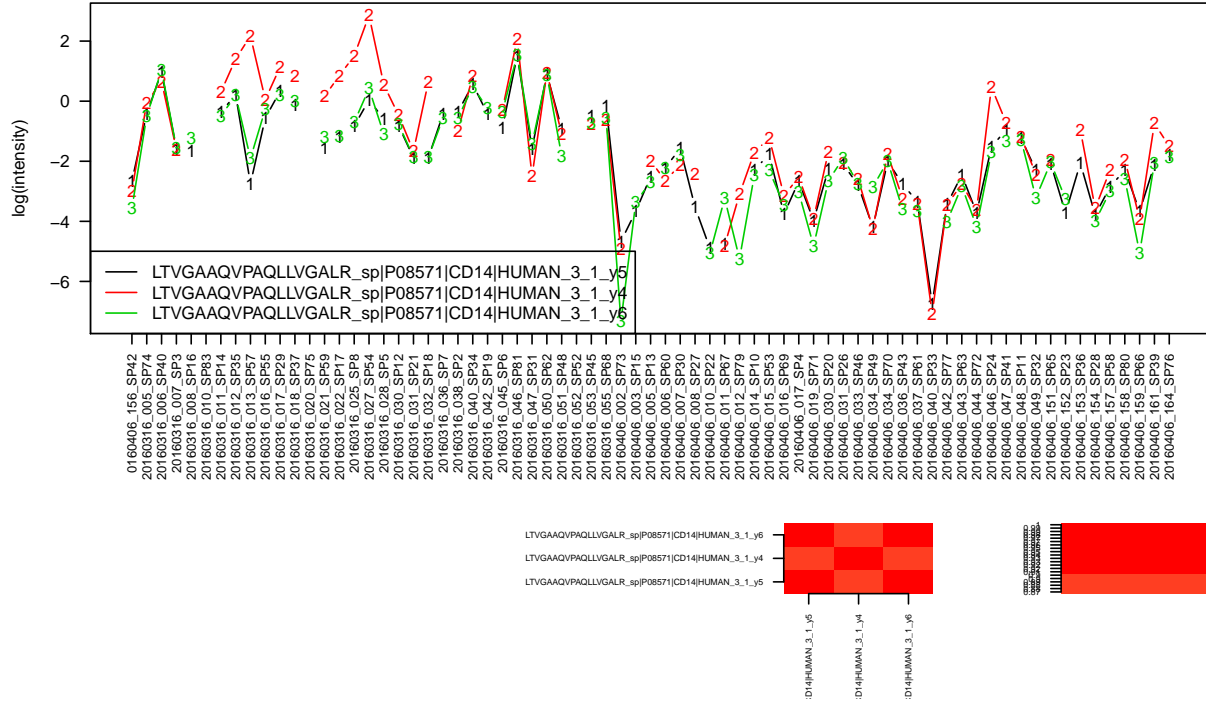

sp|P11413-1|G6PD|HUMAN\_LEDFFAR\_2

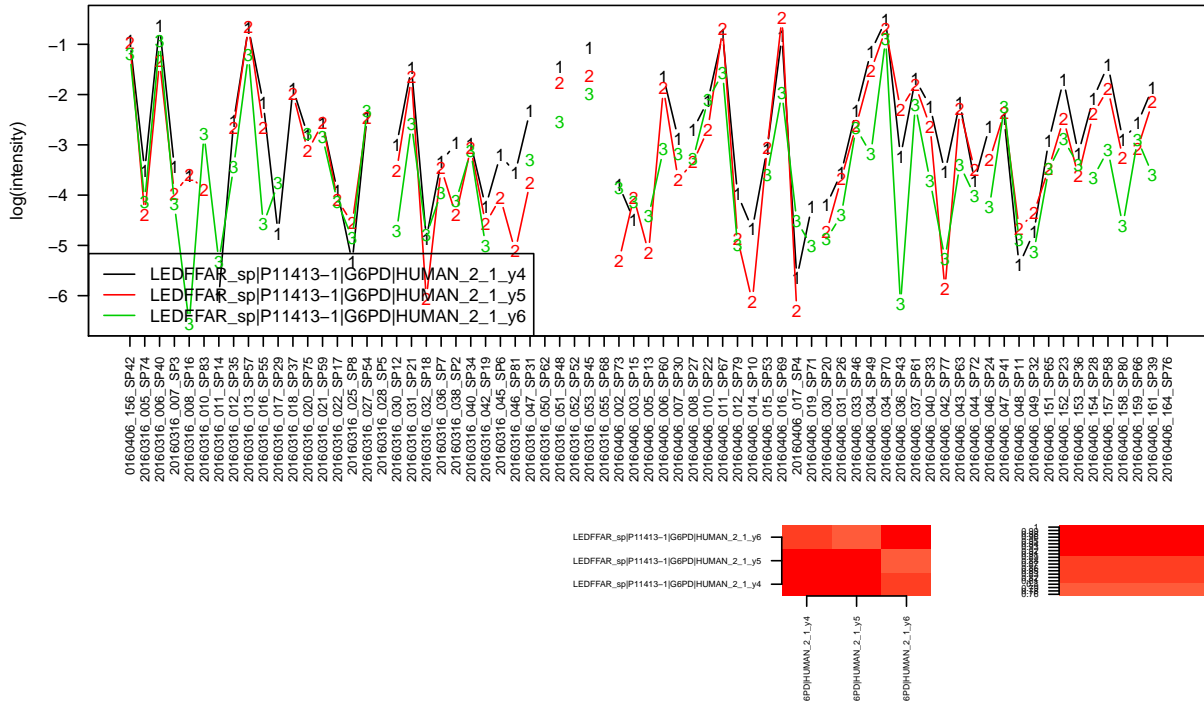

sp|P11413-1|G6PD|HUMAN\_WDGVPFILR\_2

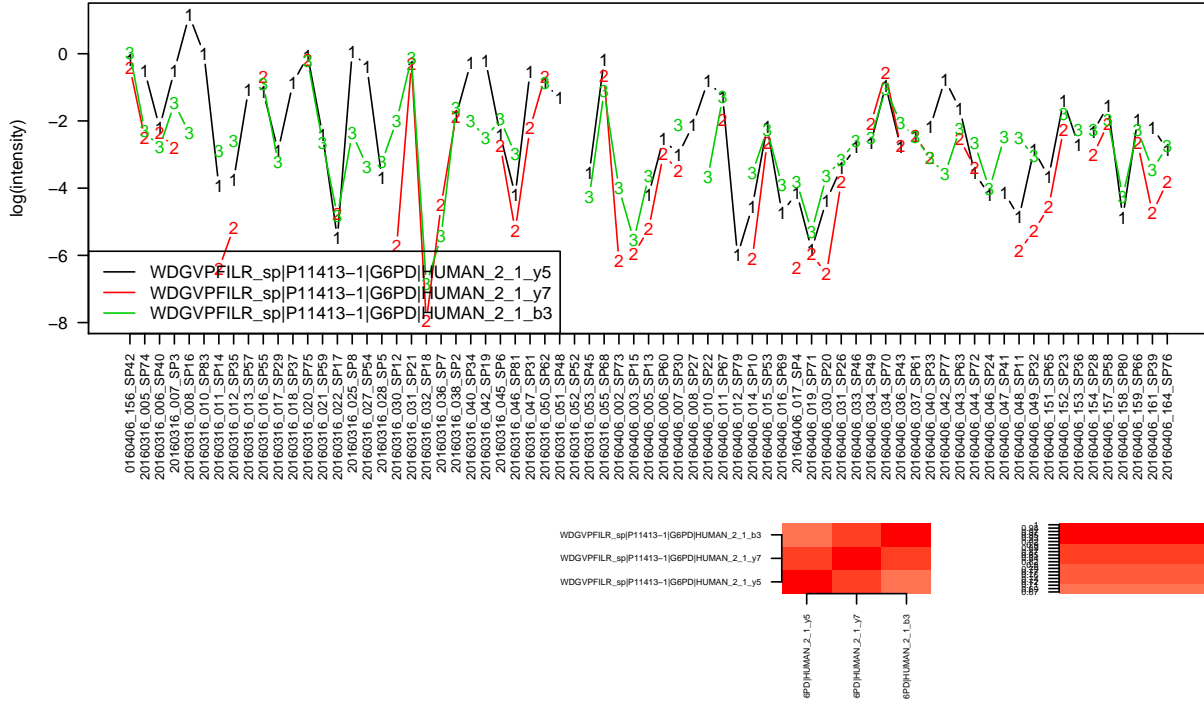

sp|P15153|RAC2|HUMAN\_HHCPSTPIILVGTK\_3

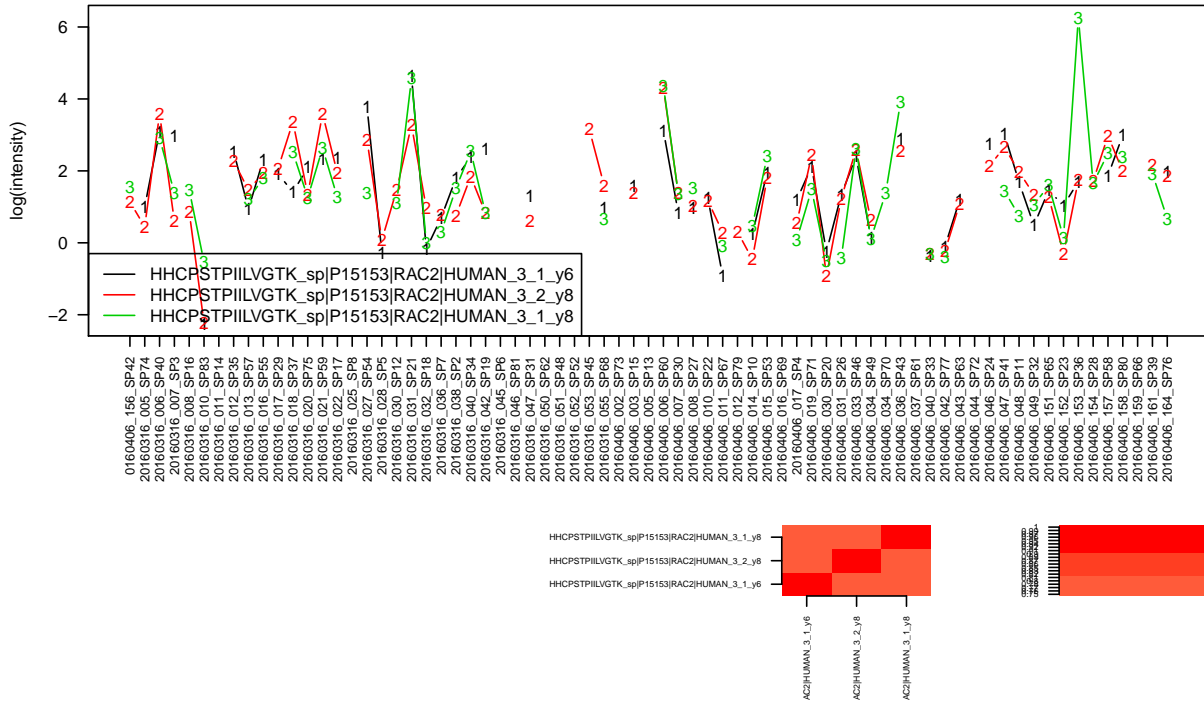

sp|P15153|RAC2|HUMAN\_LAPITYPQGLALAK\_2

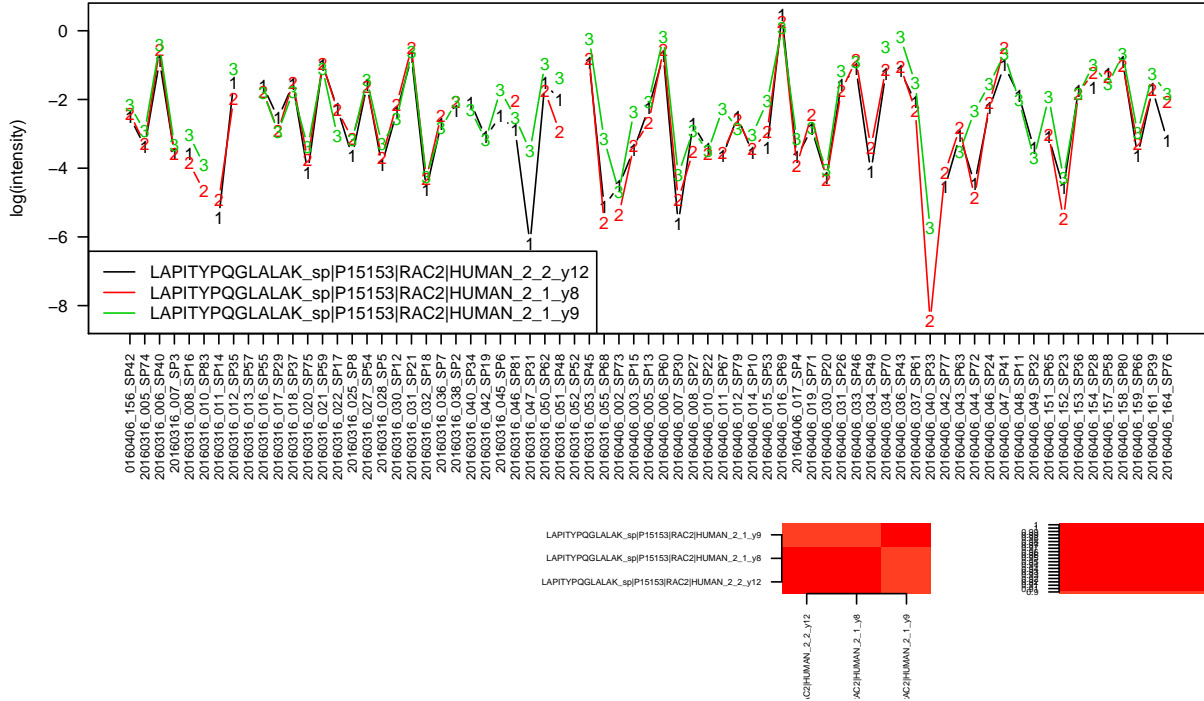

sp|P15153|RAC2|HUMAN\_YLECSALTQR\_2

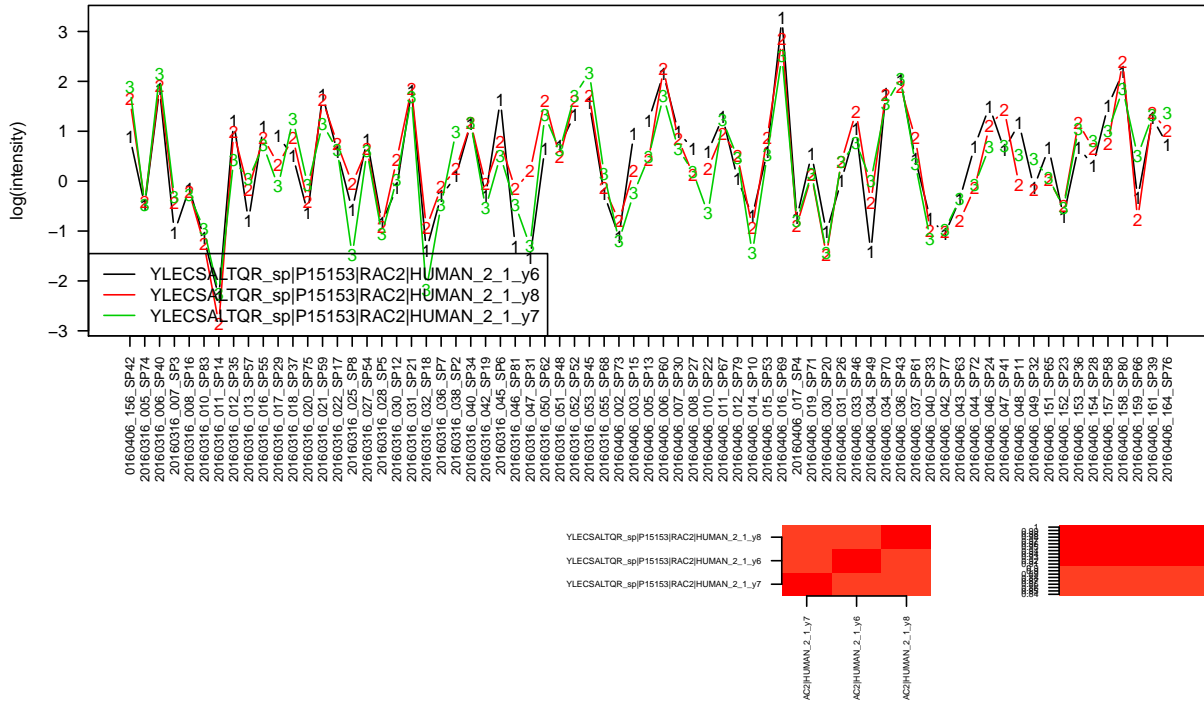

sp|P15311|EZRI|HUMAN\_IGFPWSEIR\_2

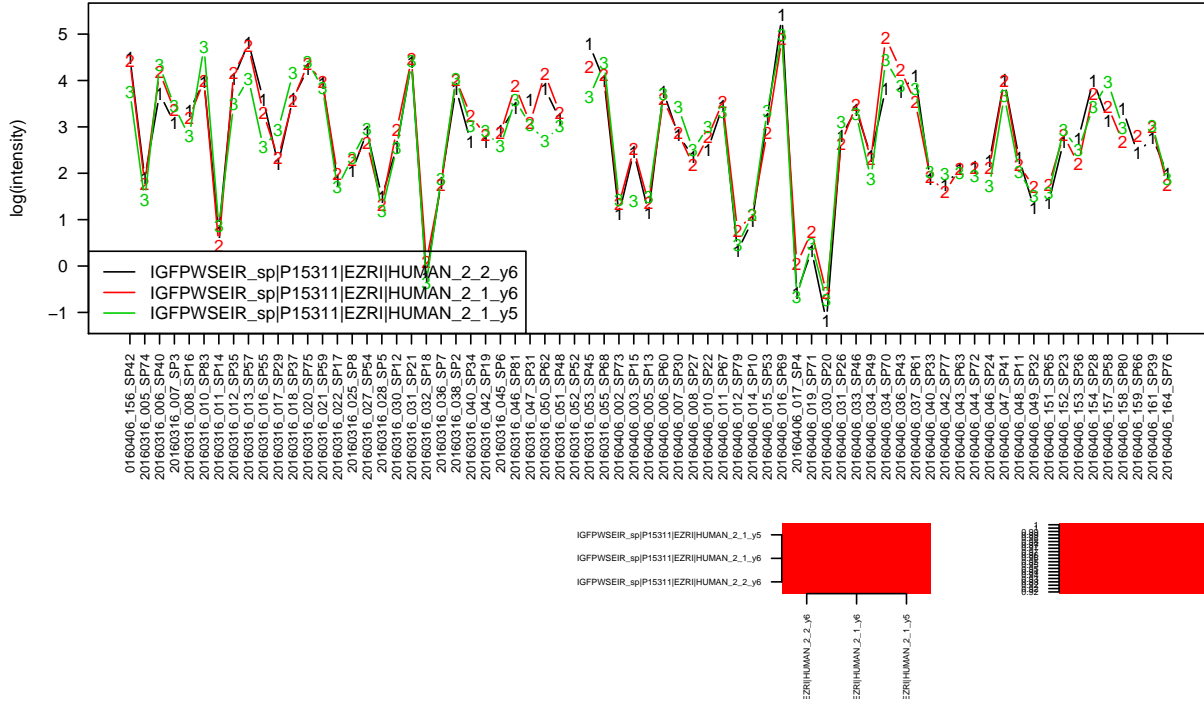

sp|P15311|EZRI|HUMAN\_LFFLQVK\_2

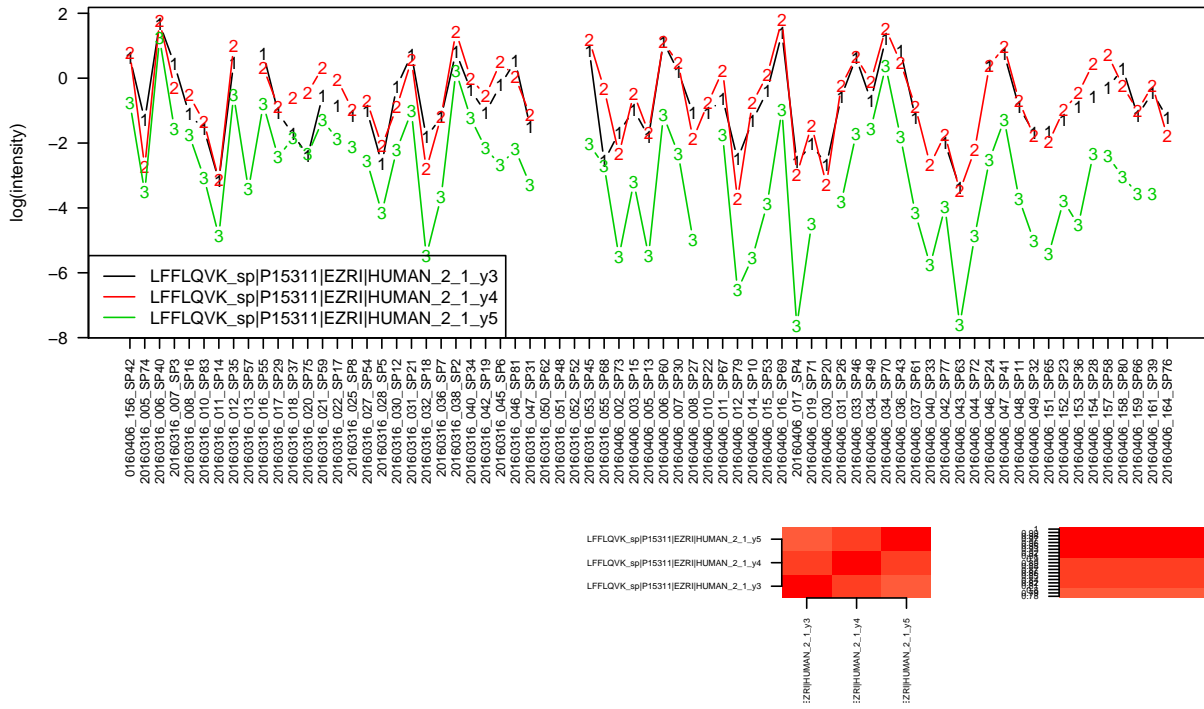

sp|P15311|EZRI|HUMAN\_SGYLSSER\_2

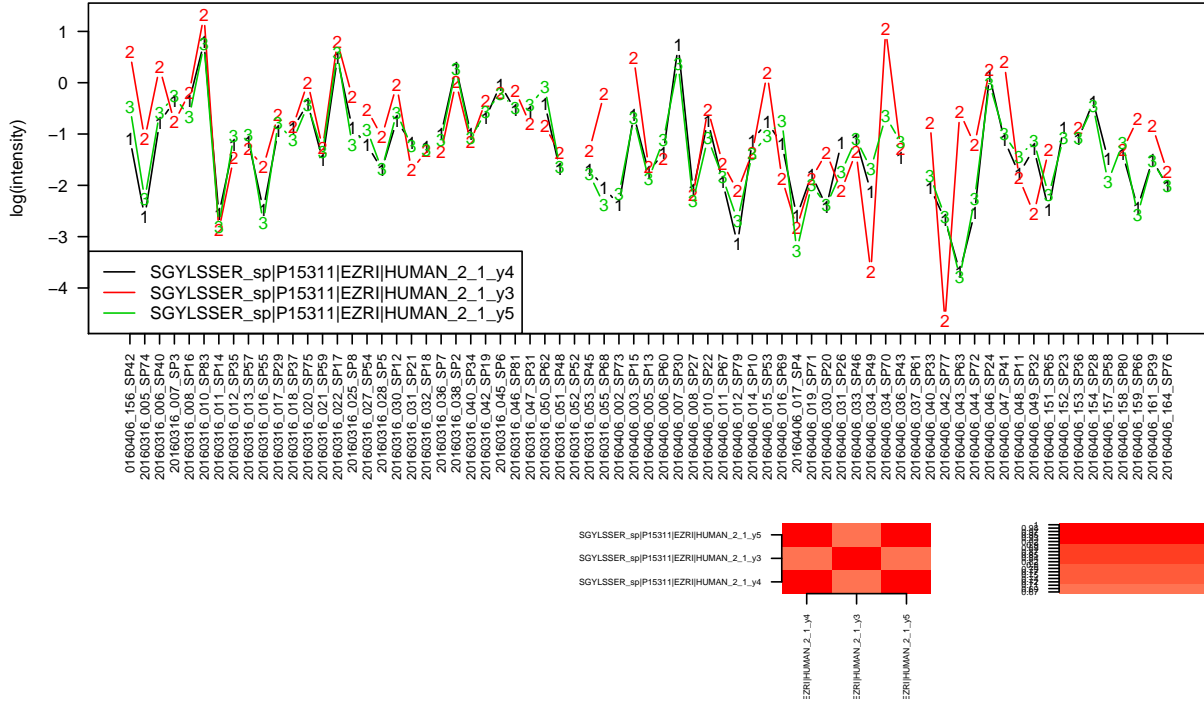

sp|P18510-1|IL1RA|HUMAN\_IWDVNQK\_2

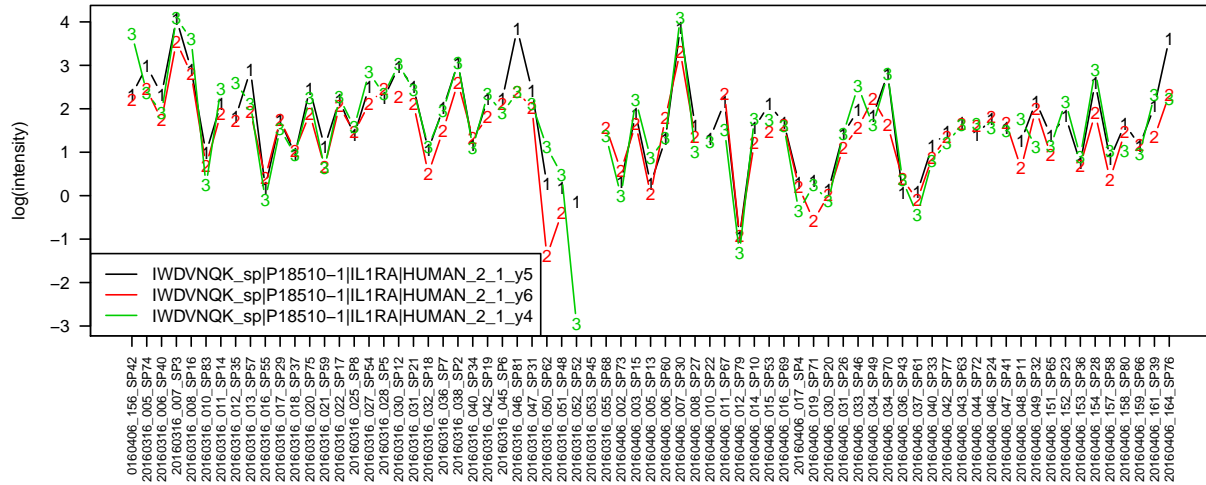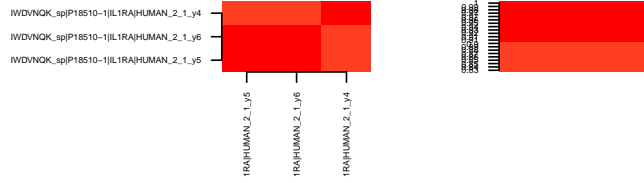

sp|P18510-1|IL1RA|HUMAN\_LQLEAVNITDLSENR\_2

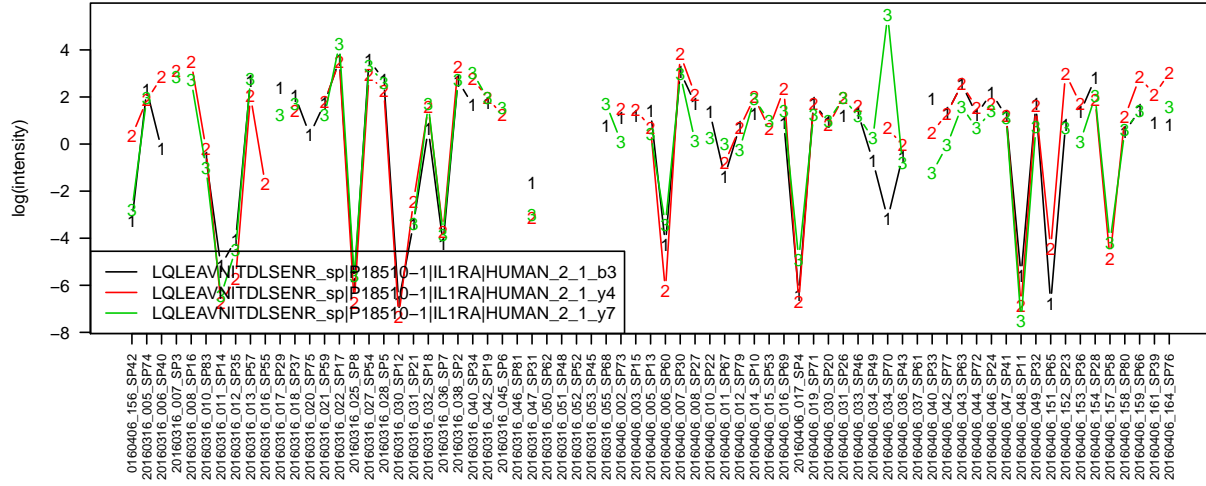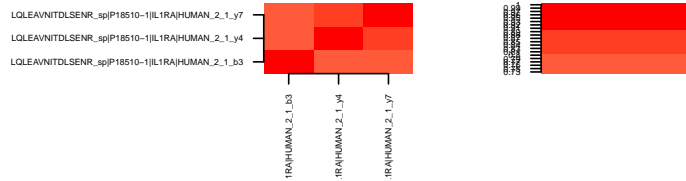

sp|P18510-1|IL1RA|HUMAN\_NNQLVAGYLQGPVNVNLEEK\_2

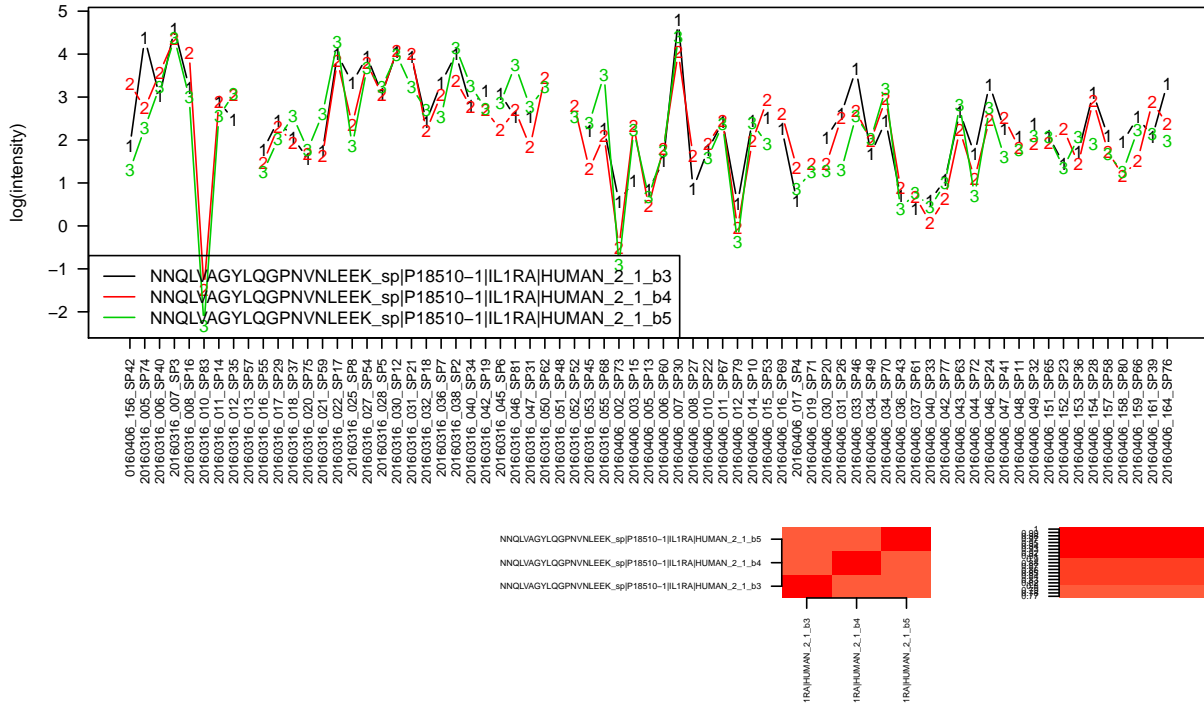

sp|P19957|ELAF|HUMAN\_GPVSTKPGSCPIILIR\_3

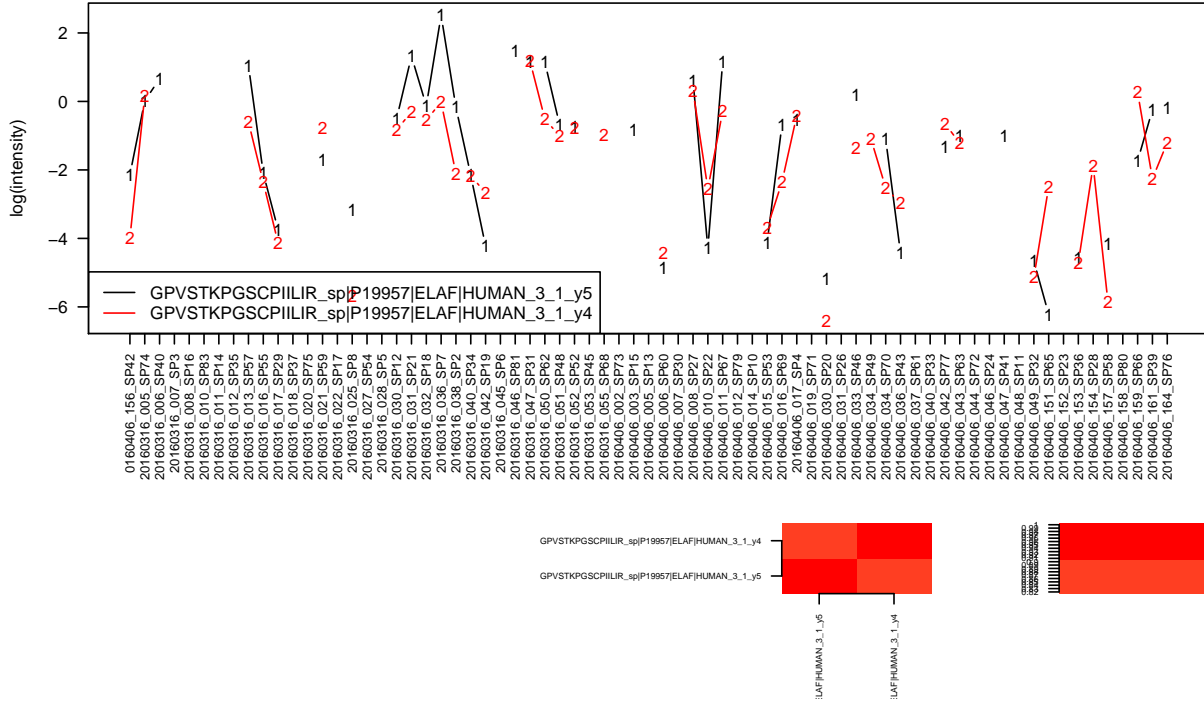

sp|P19961|AMY2B|HUMAN\_SGNEDEFR\_2

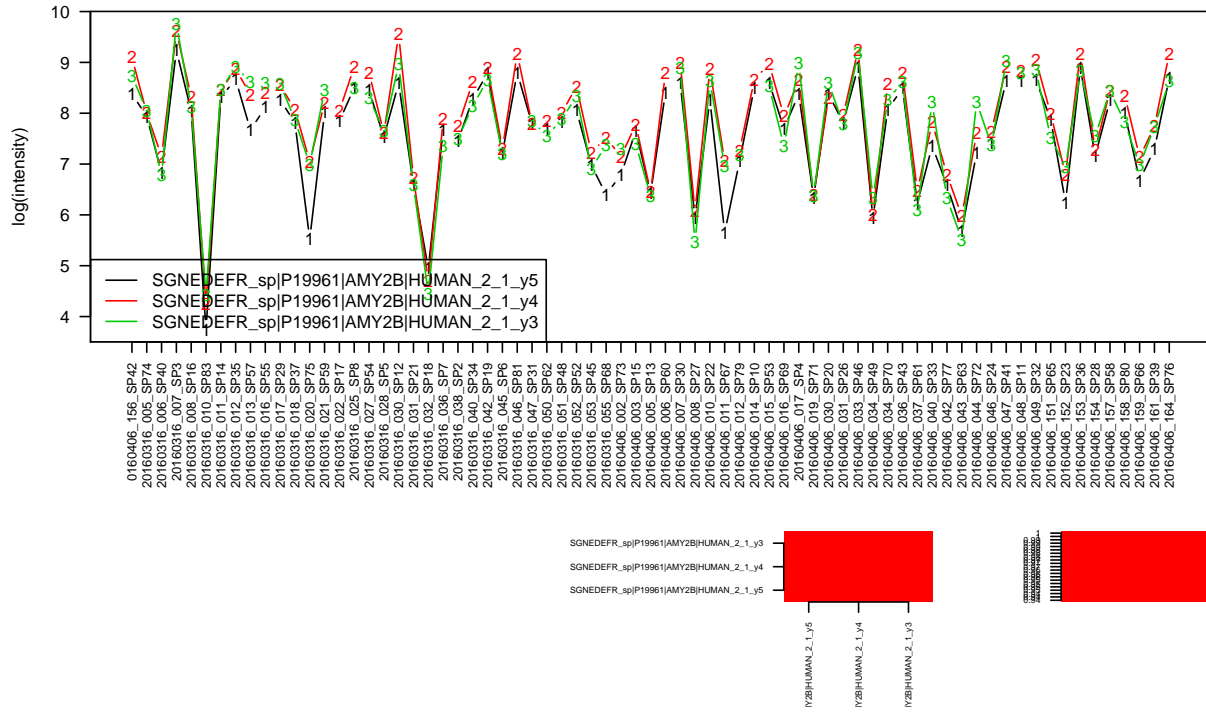

sp|P19961|AMY2B|HUMAN\_TSIVHLFEWR\_2

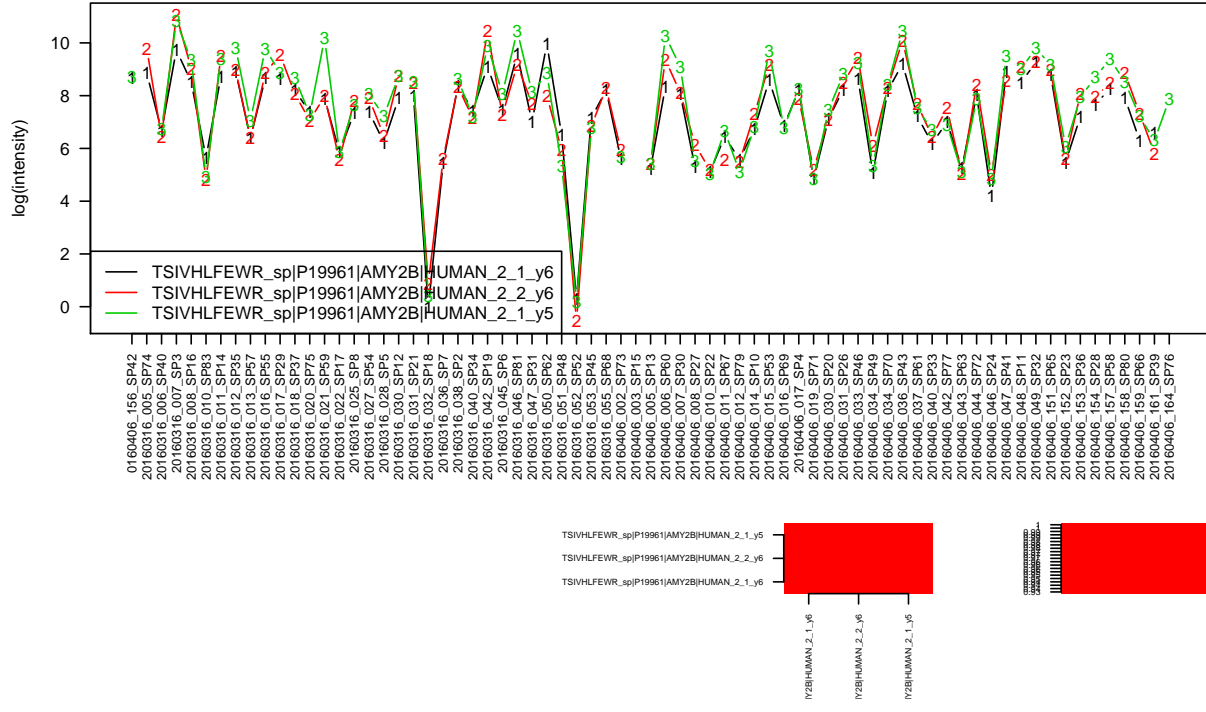



sp|P19961|AMY2B|HUMAN\_WVDIALECR\_2

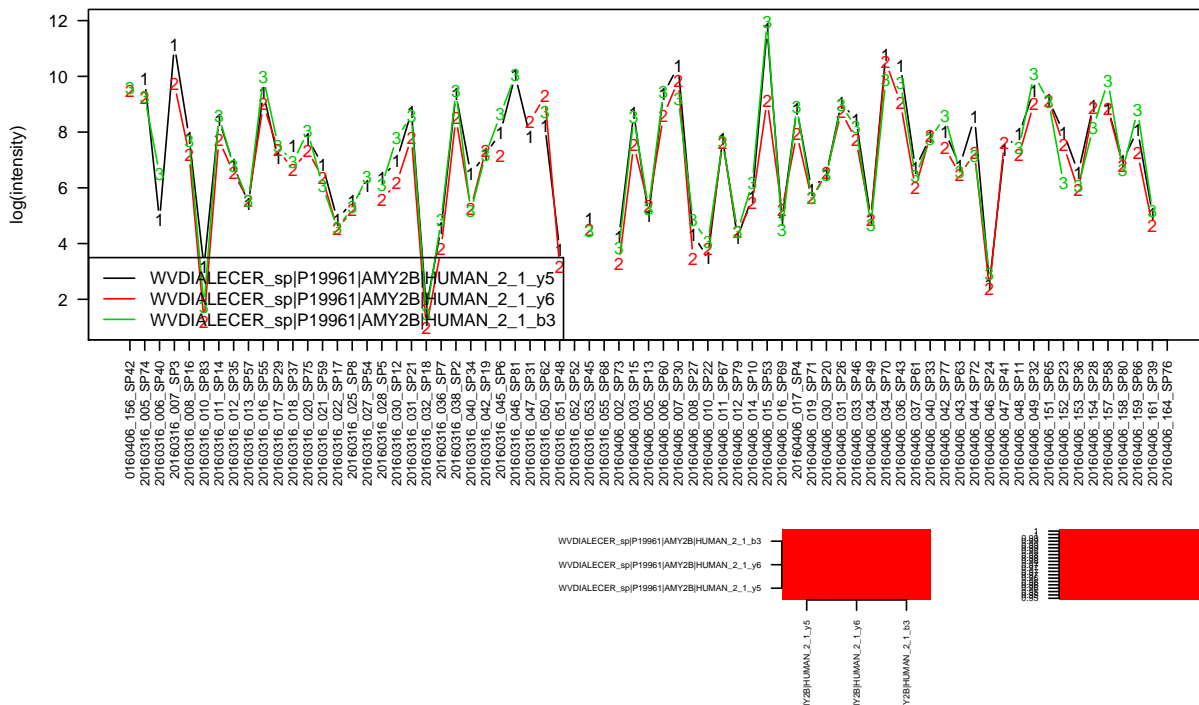

sp|P29373|RABP2|HUMAN\_IAVAAASKPAVEIK\_3

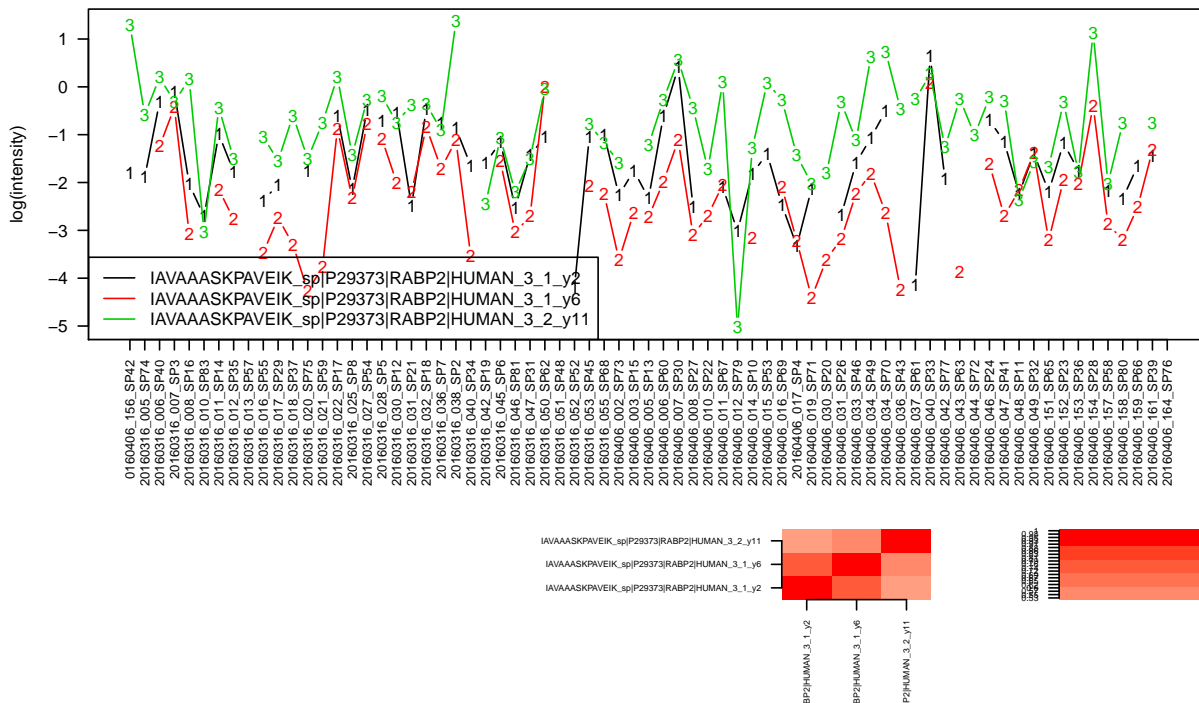

sp|P29373|RABP2|HUMAN\_SENFEELLK\_2

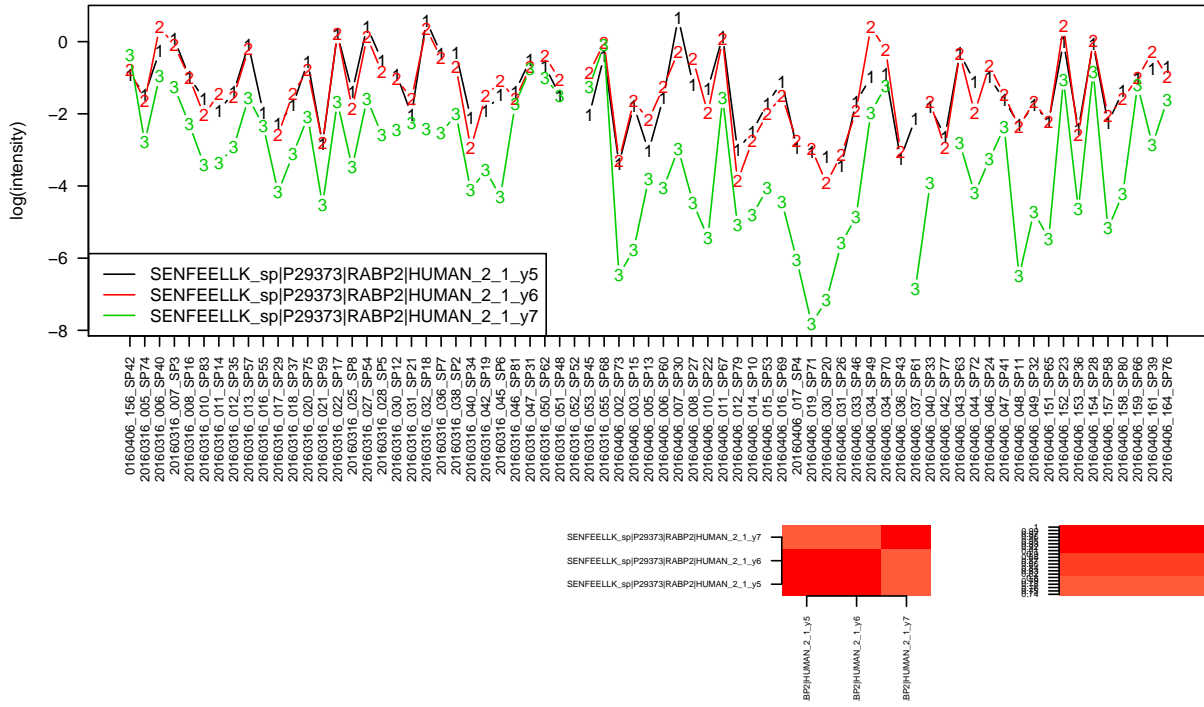

sp|P29373|RABP2|HUMAN\_VGEEFEEQTVDGRPCK\_3

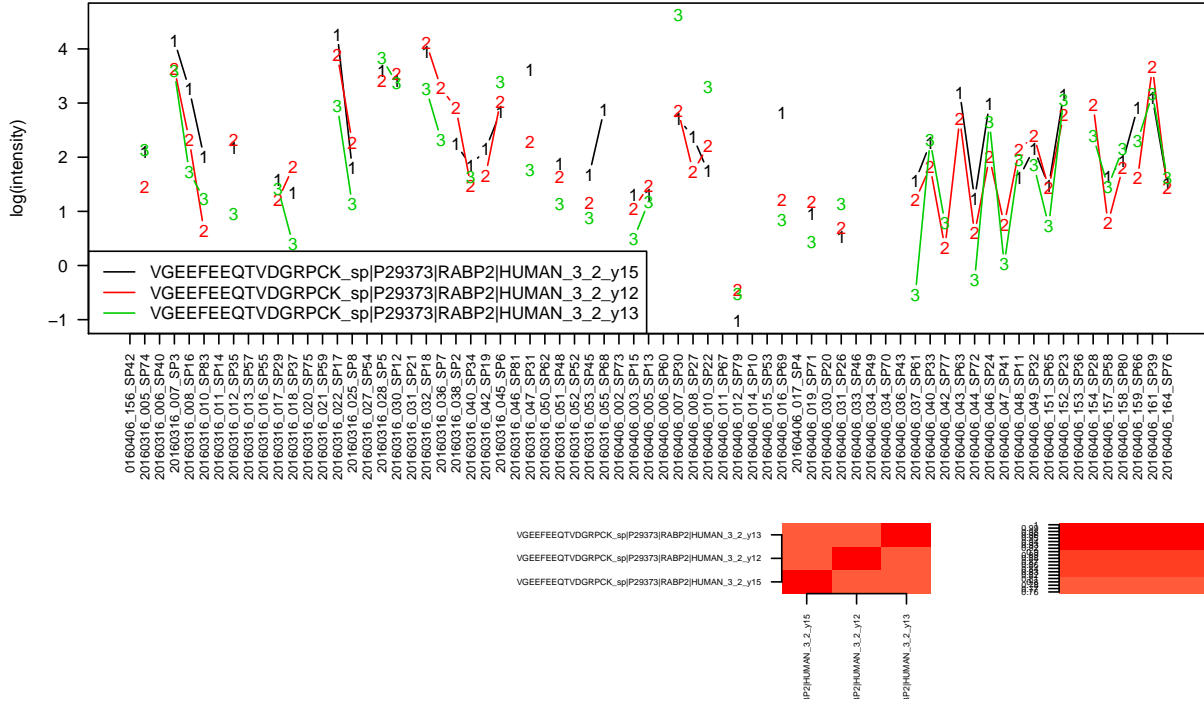

sp|P30740|ILEU|HUMAN\_LVLVNAIFYK\_2

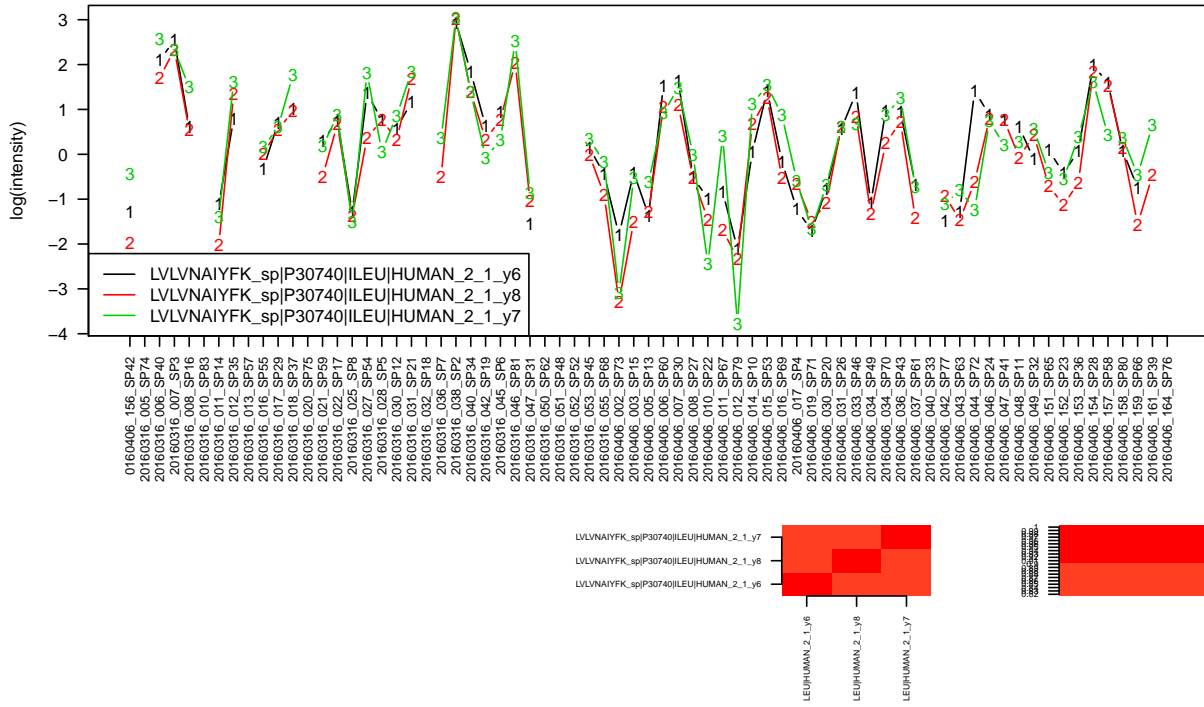

sp|P30740|ILEU|HUMAN\_TFHFNTVEEVHSR\_3

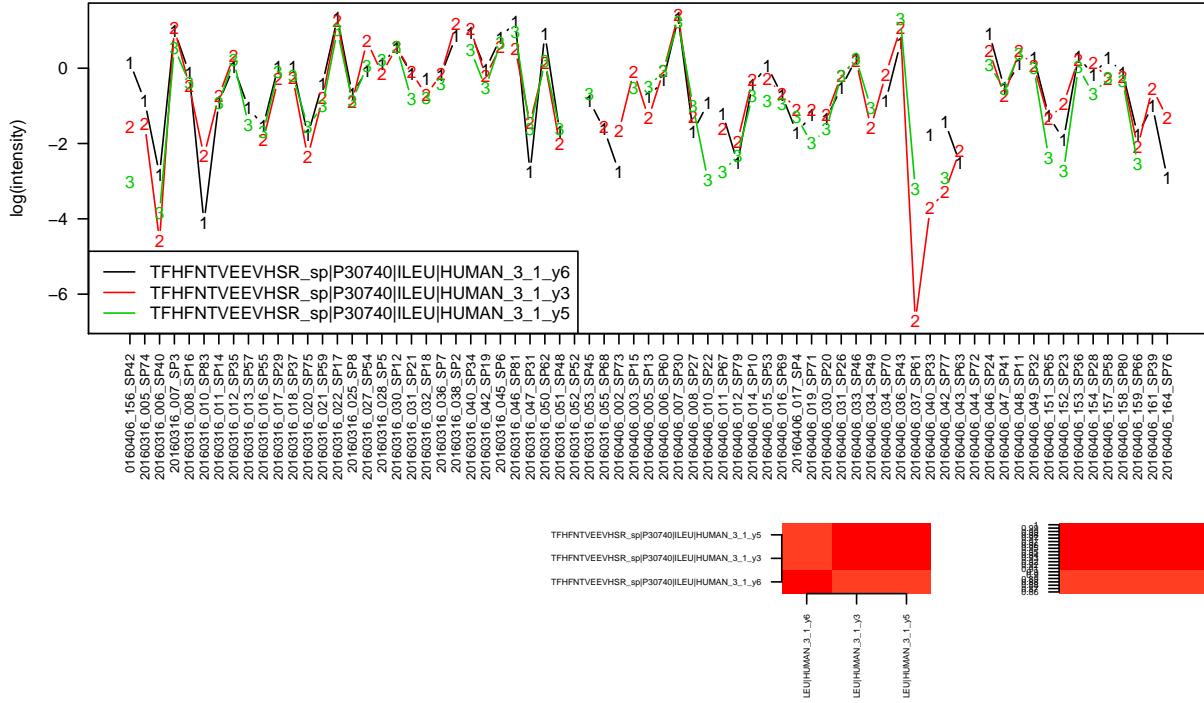

sp|P30740||ILEU|HUMAN\_TYGADLASVDFQHASEDAR\_3

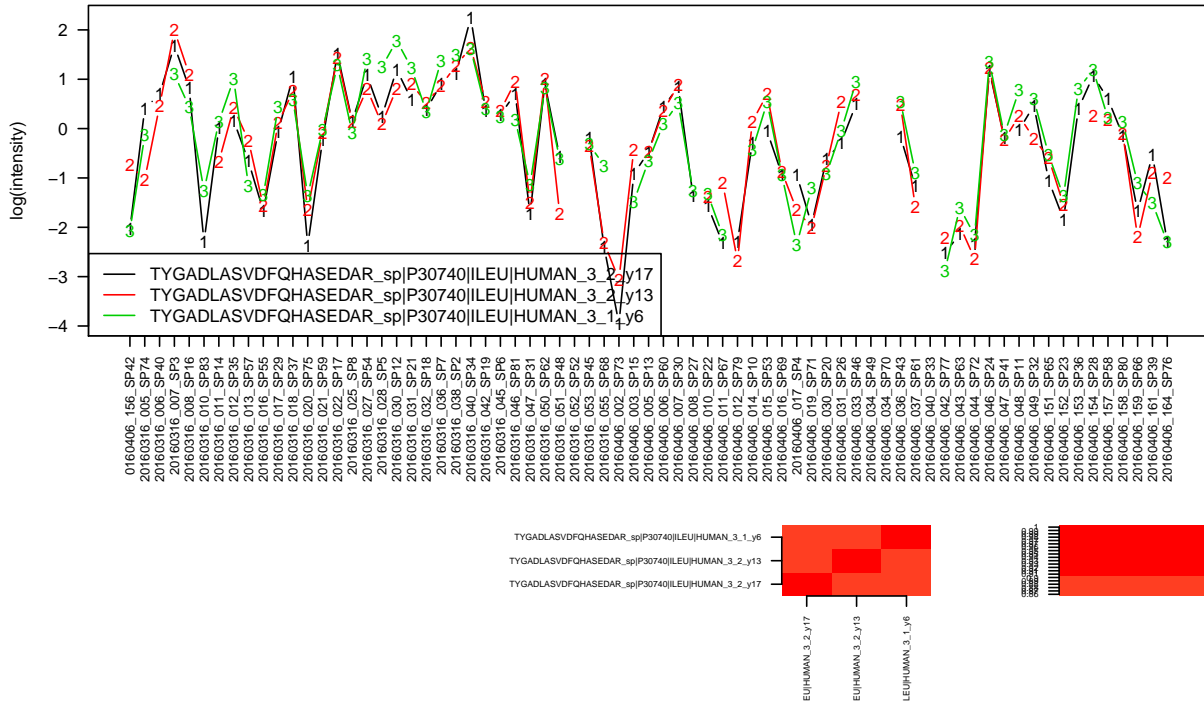

sp|P36952-1||SPB5|HUMAN\_IIELPFQNK\_2

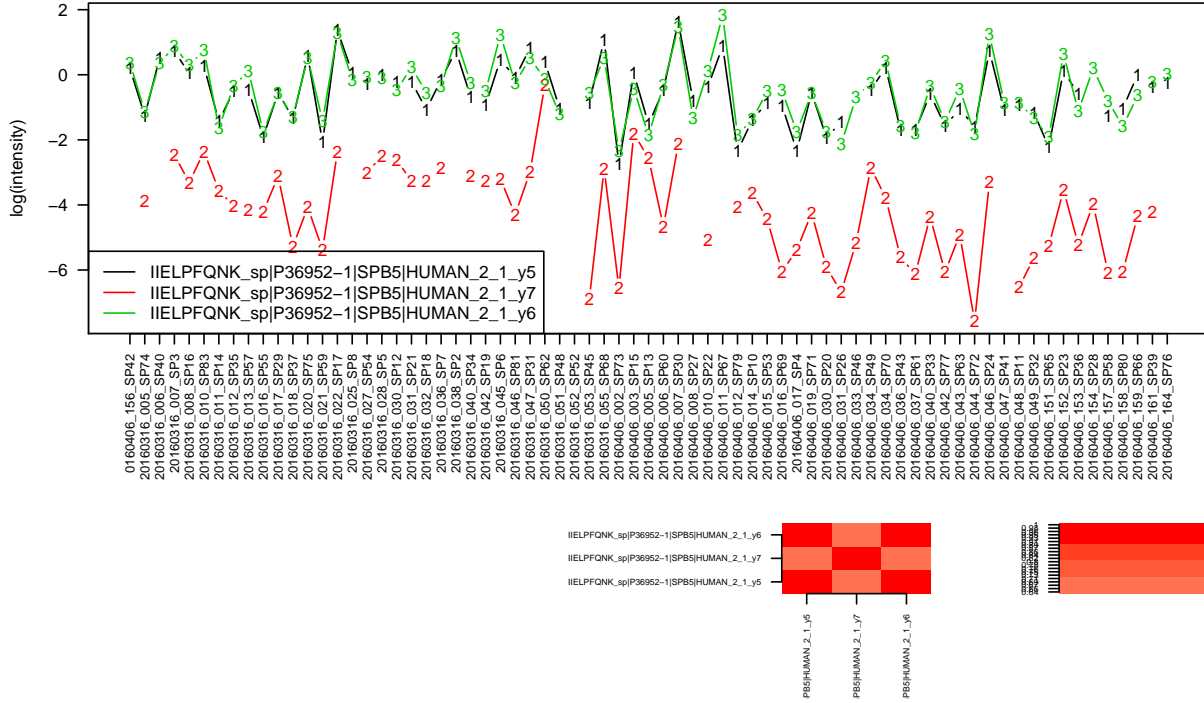

sp|P36952-1|SPB5|HUMAN\_ILVVNAAYFVGK\_2

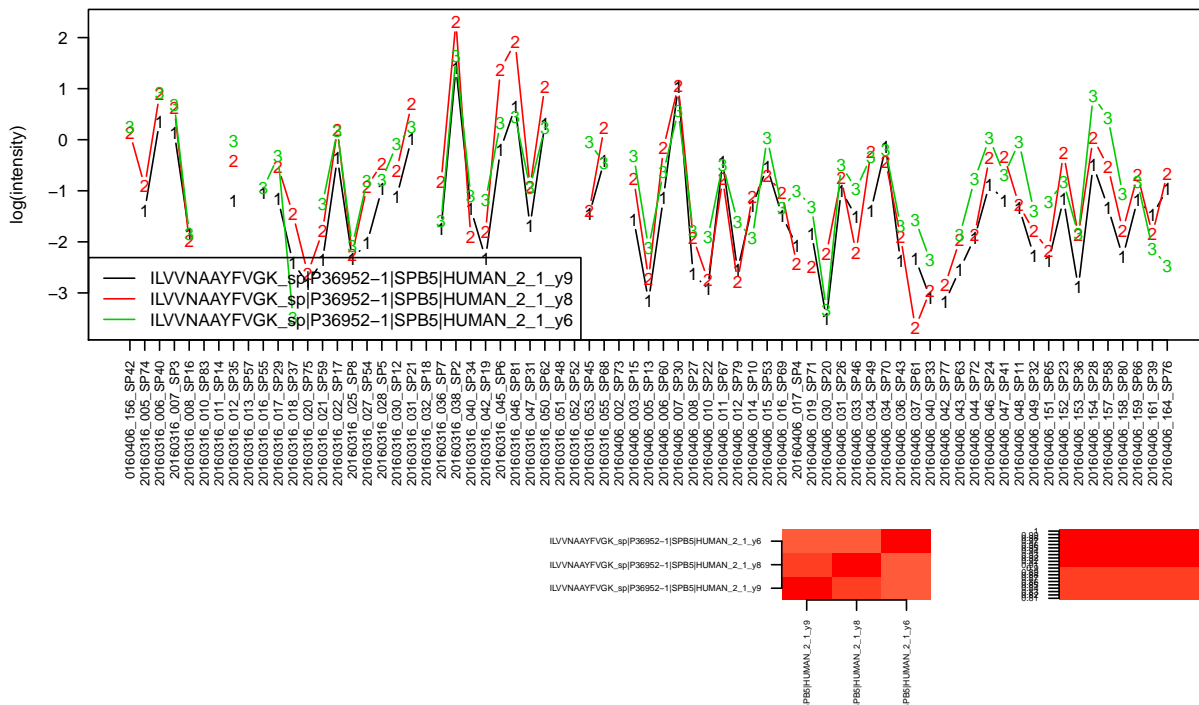

sp|P46940|IQGA1|HUMAN\_LGNFFSPK\_2

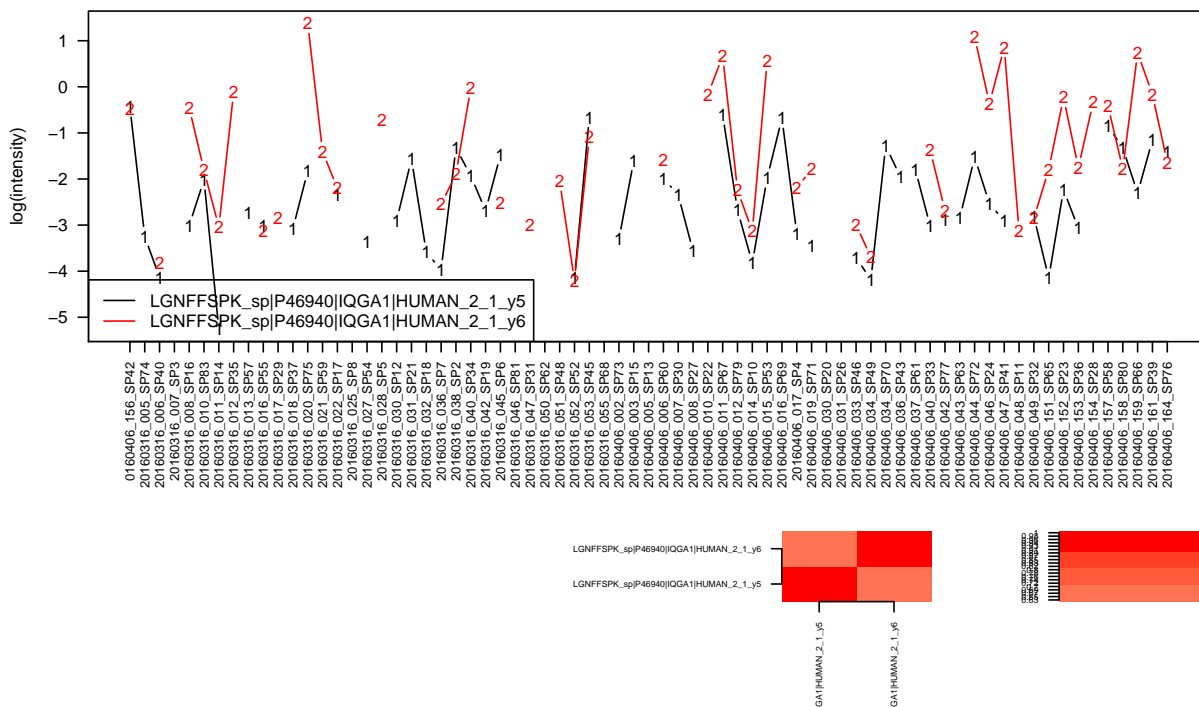

sp|P62834|RAP1A|HUMAN\_LVVLGGVGVK\_2

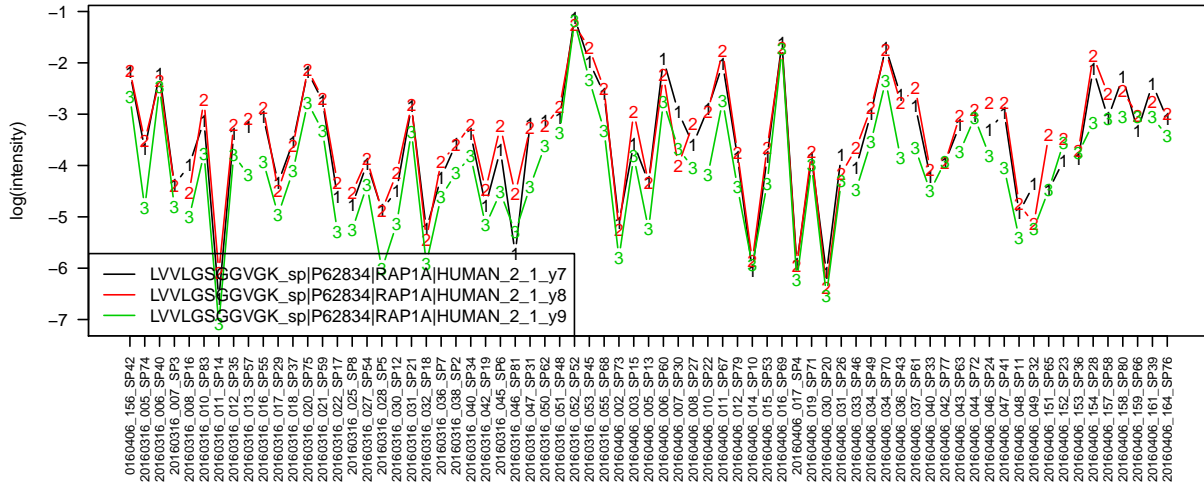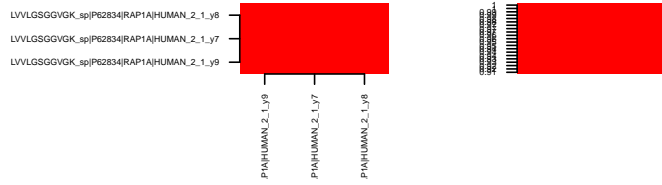

sp|P62834|RAP1A|HUMAN\_YDPTIEDSYR\_2

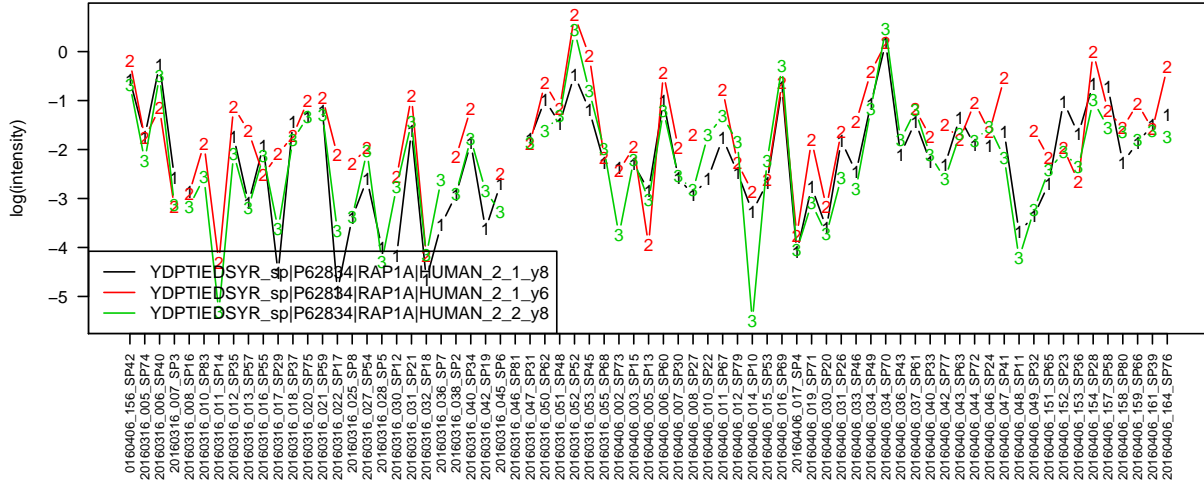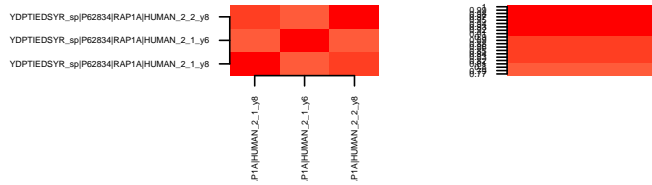

sp|P80188-1|NGAL|HUMAN\_SYPGLTSYLVR\_2

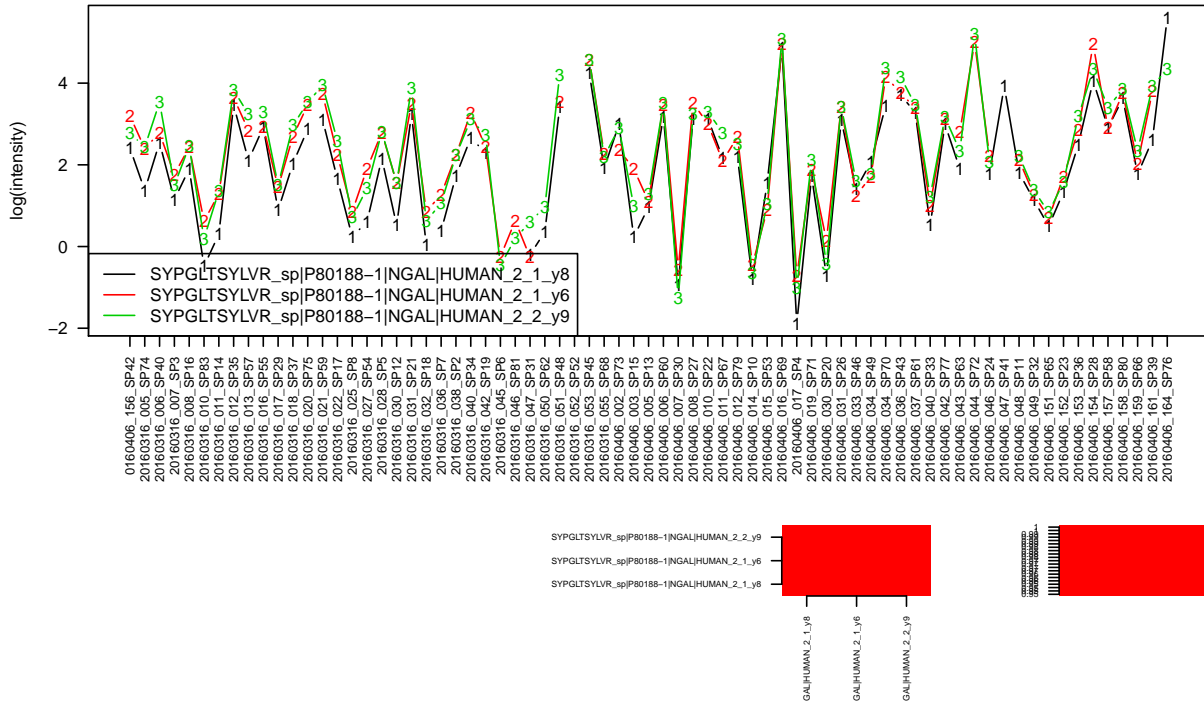

sp|P80188-1|NGAL|HUMAN\_TFVPGCQPGEFTLGNIK\_2

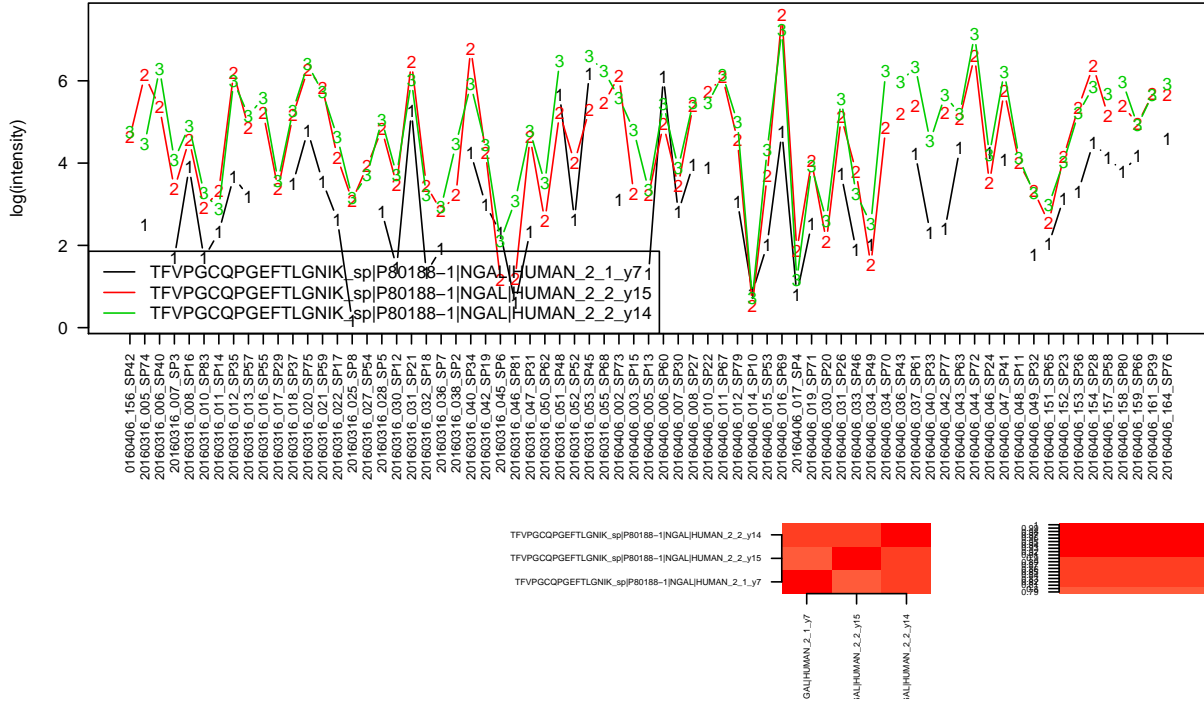

sp|P80188-1|NGAL|HUMAN\_WYVVGLAGNAILR\_2

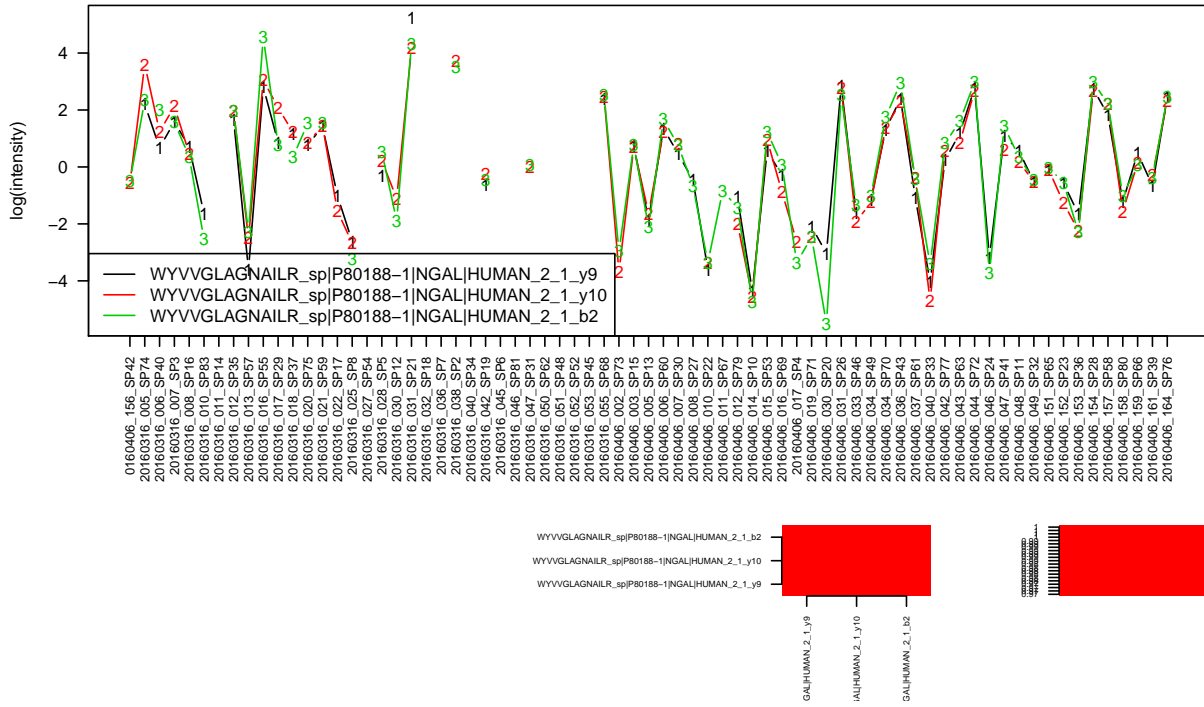

sp|Q96QR1|SG3A1|HUMAN\_CVAELGPQAVGAVK\_2

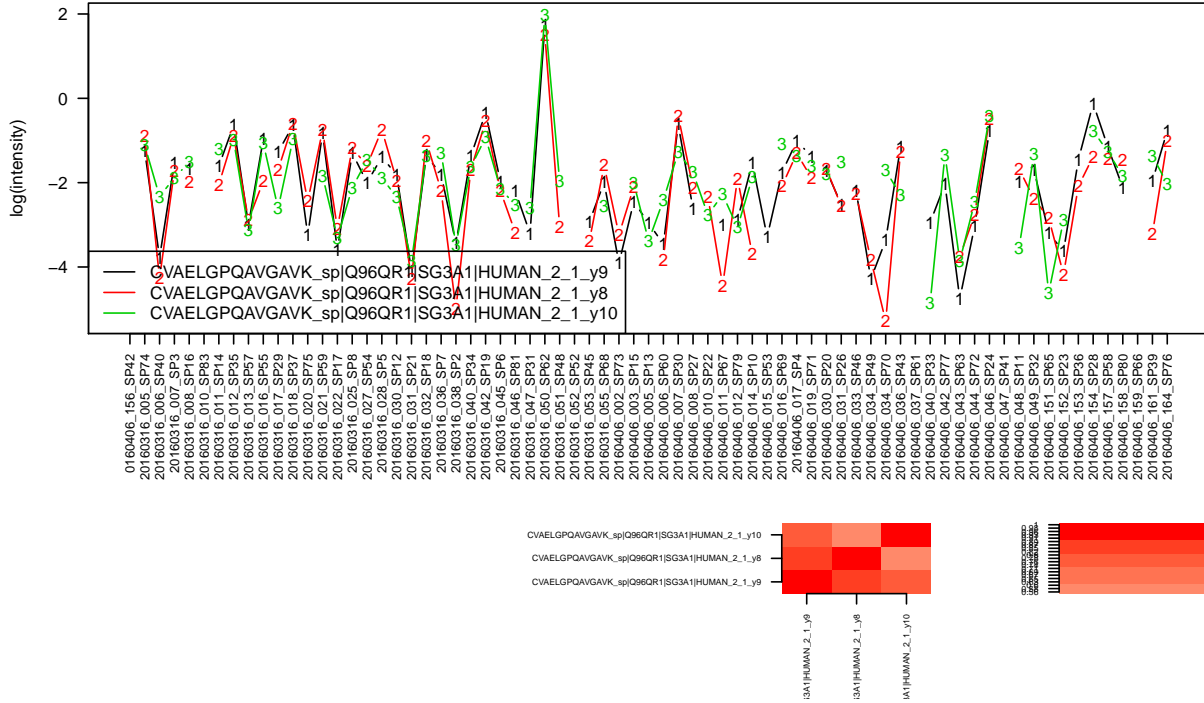



sp|Q96QR1|SG3A1|HUMAN\_LLLSSLGIPVNHIEGSQK\_3

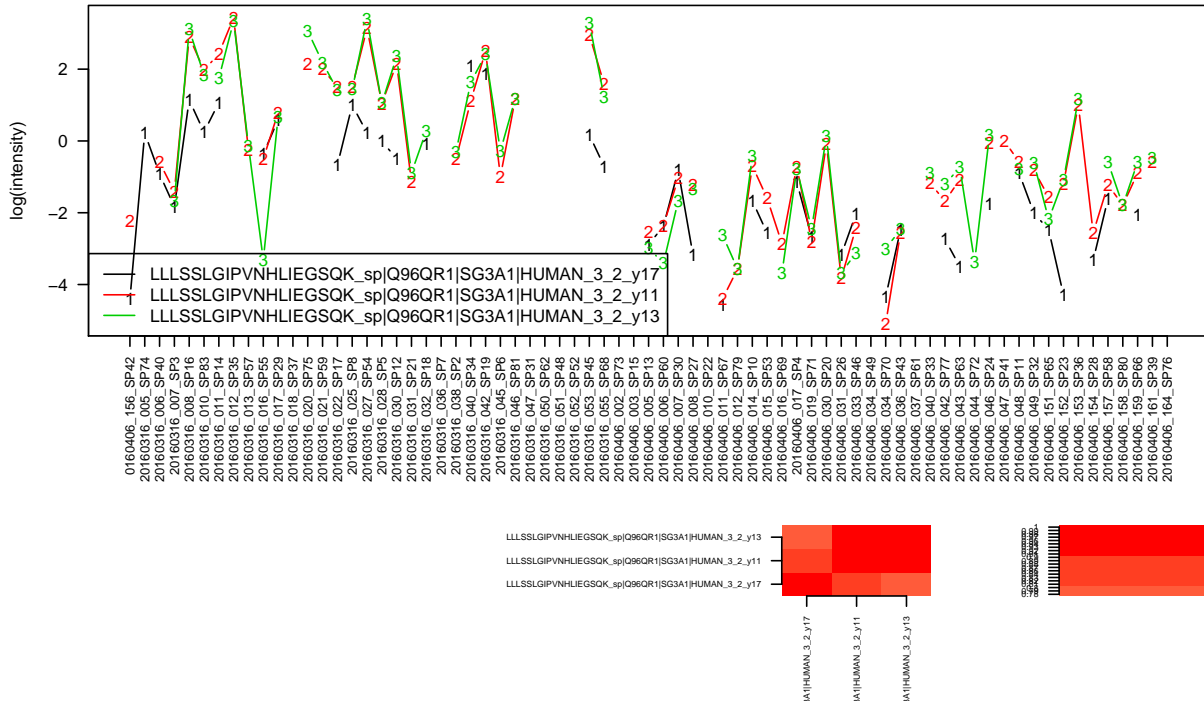

sp|Q99497|PARK7|HUMAN\_ALVILAK\_2

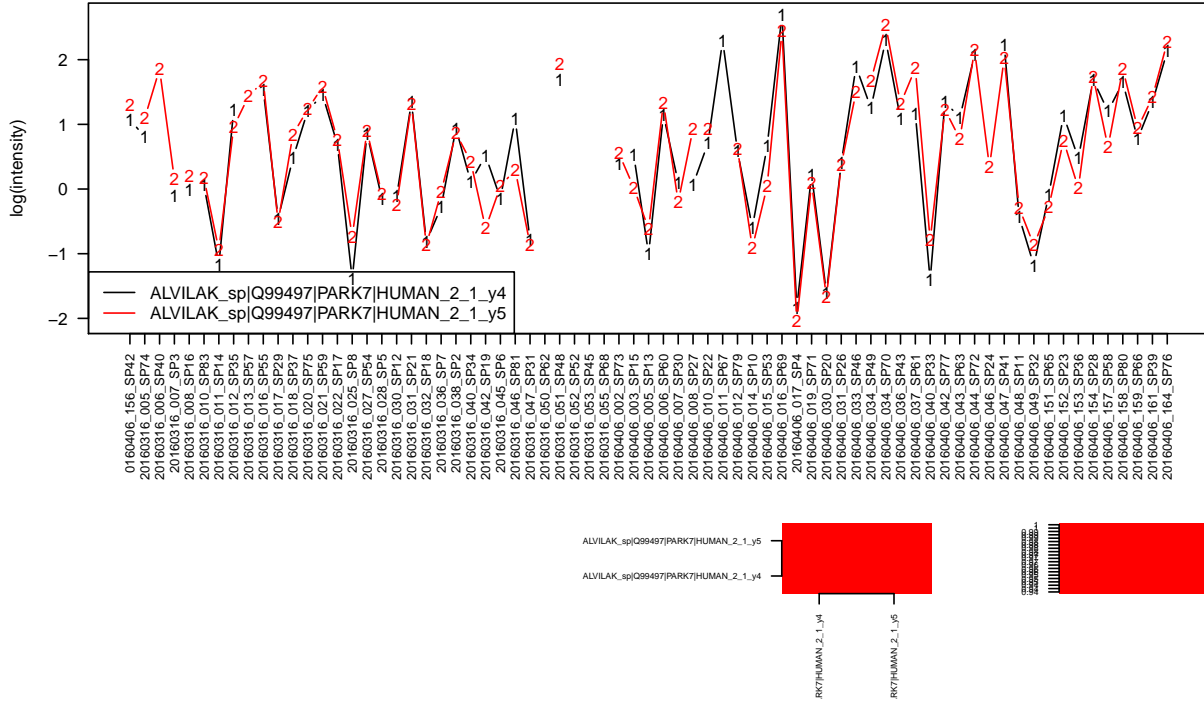

sp|Q99497|PARK7|HUMAN\_DGLILTSR\_2

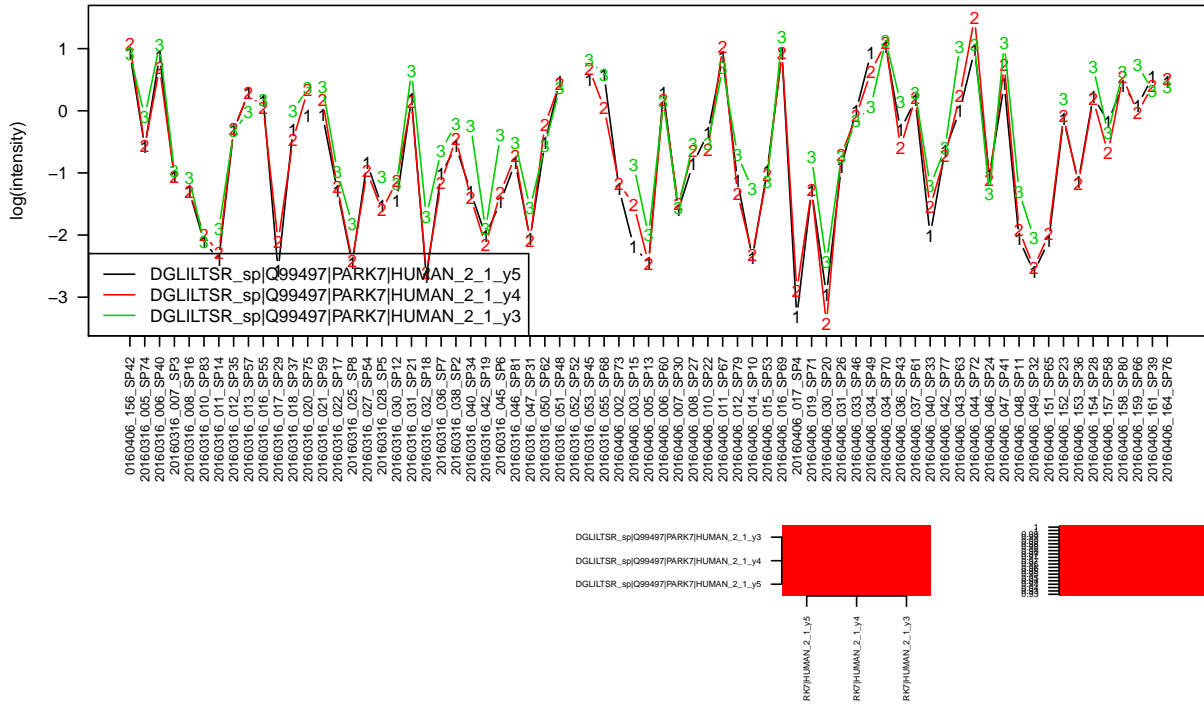

sp|Q99497|PARK7|HUMAN\_VTVAGLAGK\_2

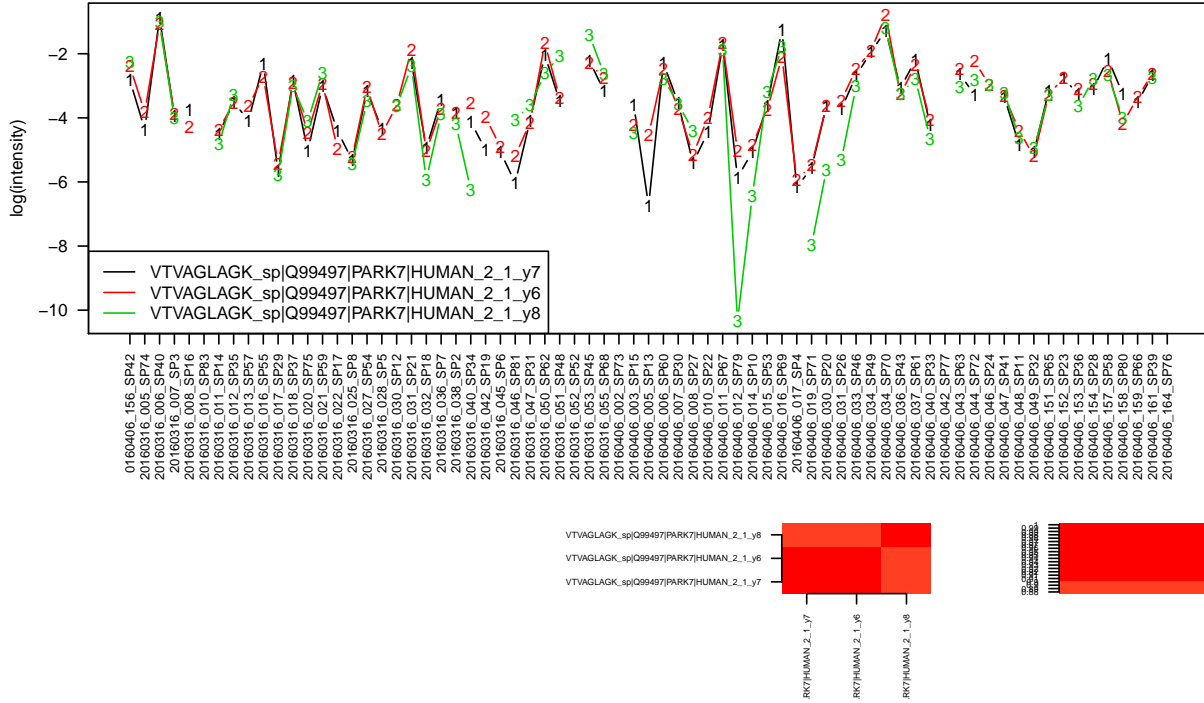

sp|Q9GZZ8|LACRT|HUMAN\_QFIENGSEFAQK\_2

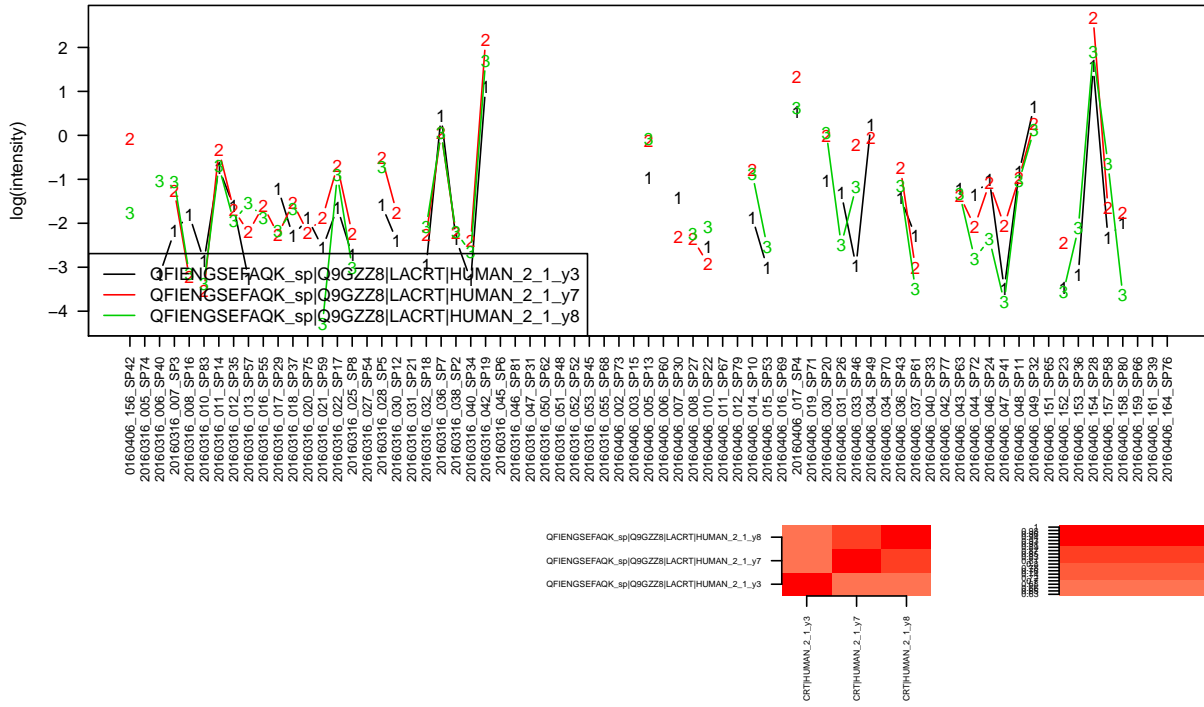

sp|Q9GZZ8|LACRT|HUMAN\_SILLTEQALAK\_2

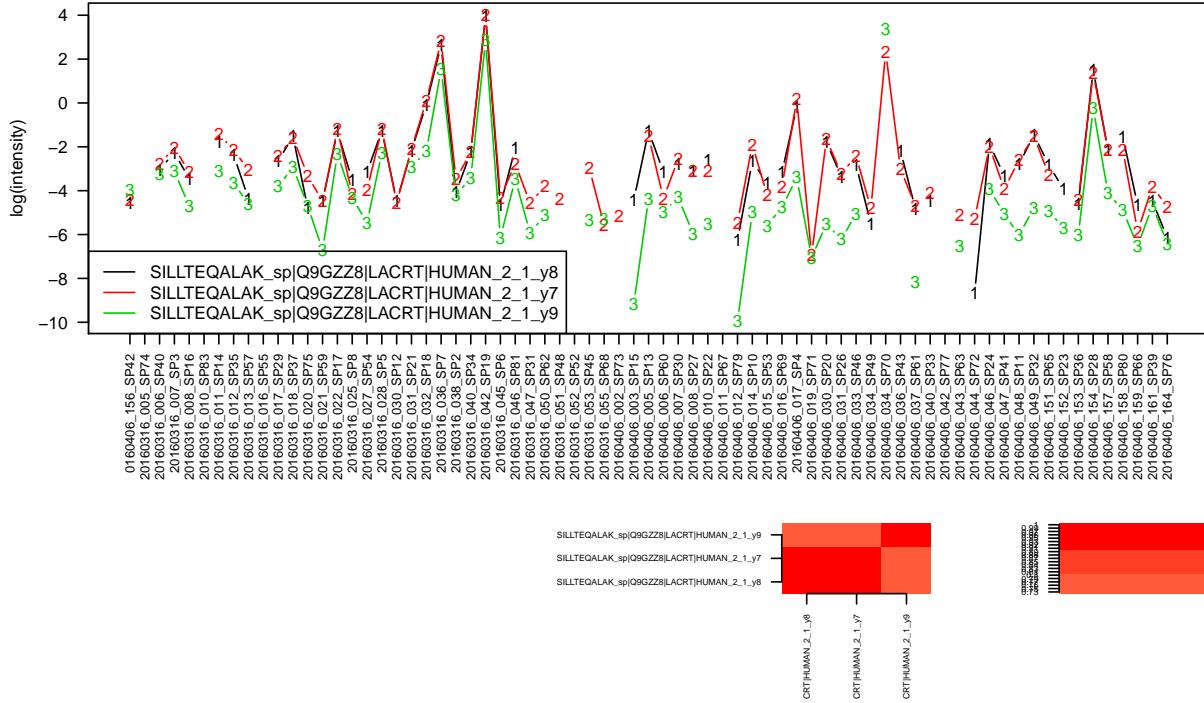

sp|Q9HC84|MUC5B|HUMAN\_CADSSFTVLAELR\_2

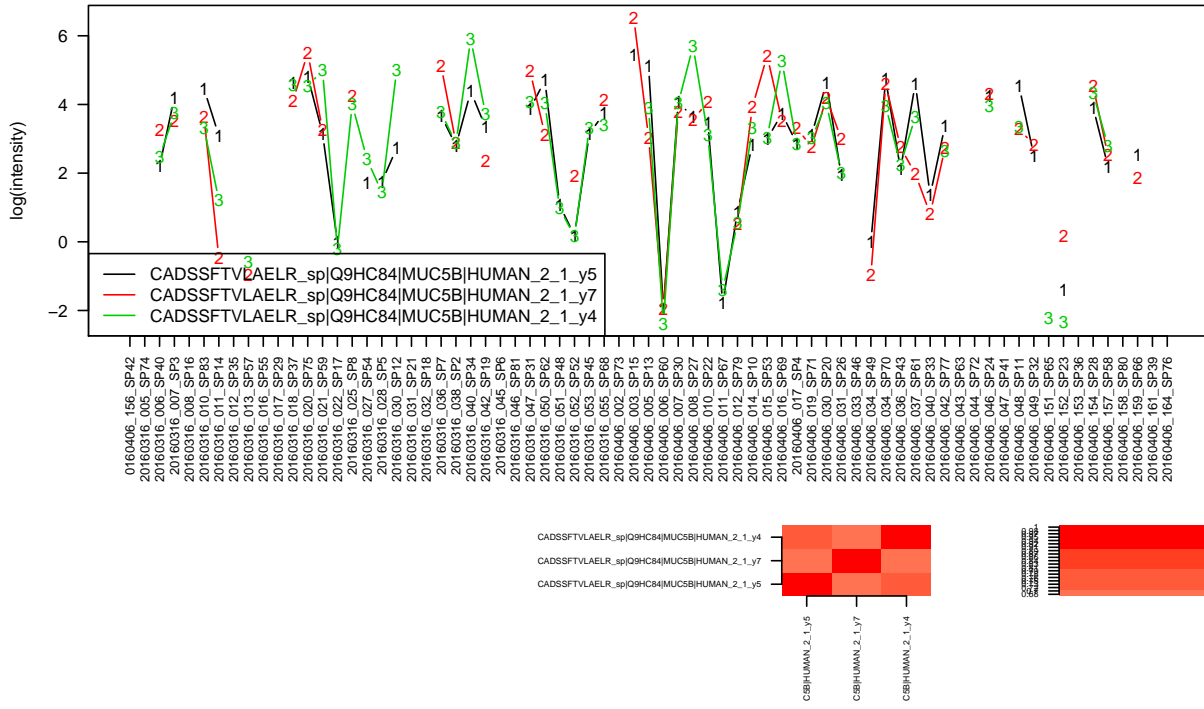

sp|Q9HC84|MUC5B|HUMAN\_VCSTWGFDFHYK\_3

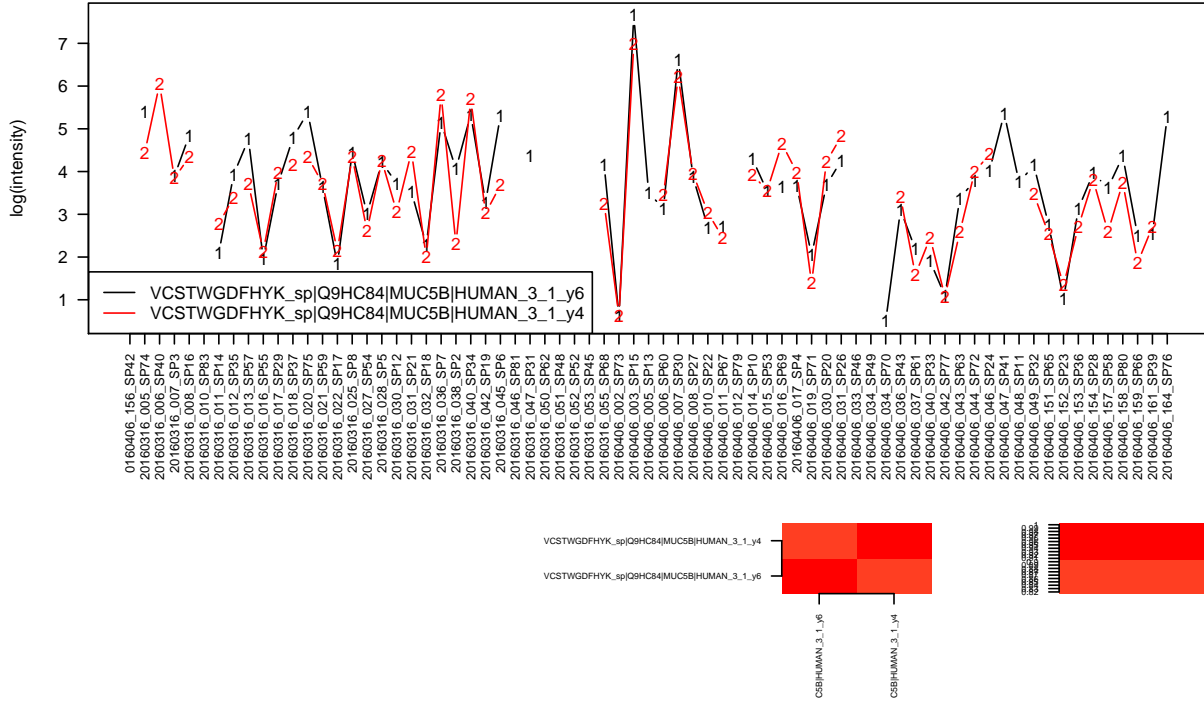

sp|Q9NQ38-3|ISK5|HUMAN\_ATAPTELCDDFK\_2

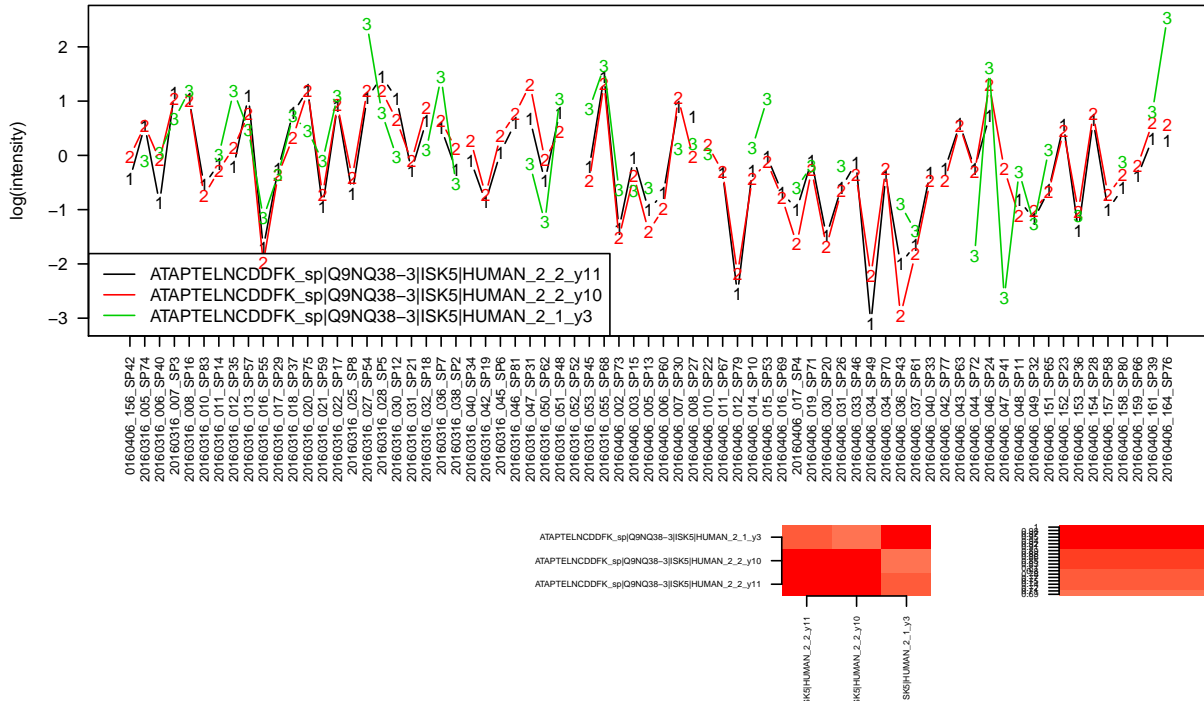

sp|Q9NQ38-3|ISK5|HUMAN\_AVFLTEALER\_2

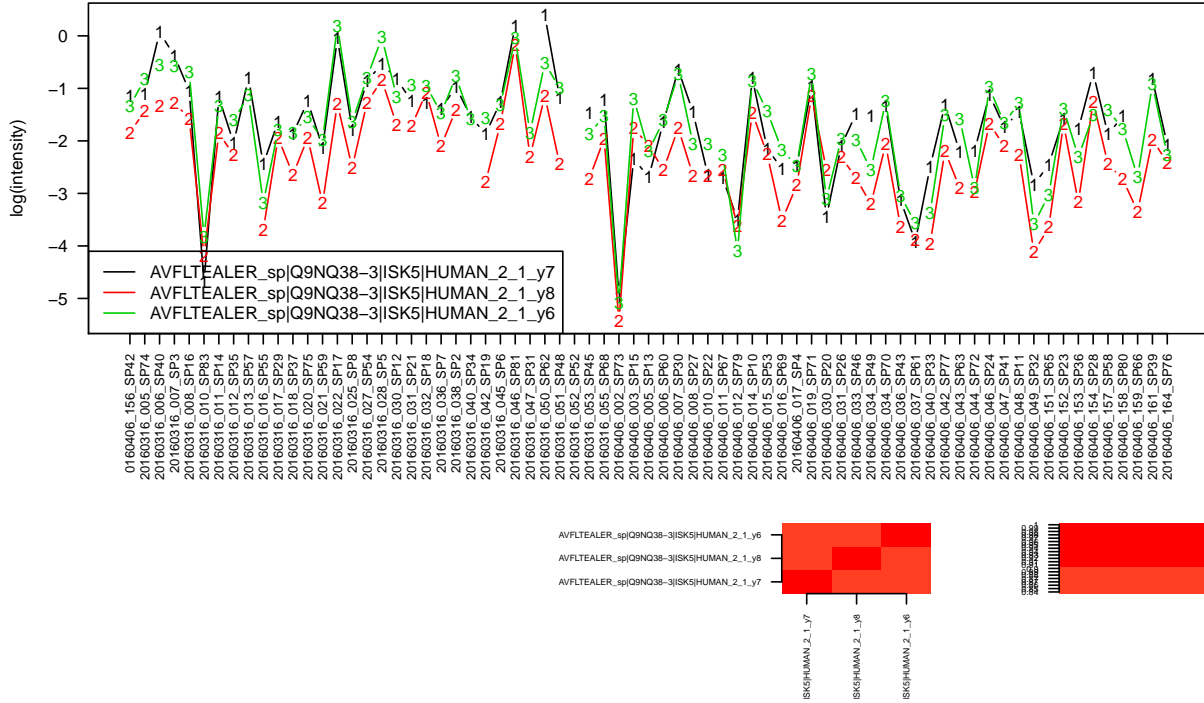

sp|Q9NZT1|CALL5|HUMAN\_AFDQDGDGHITVDELR\_2

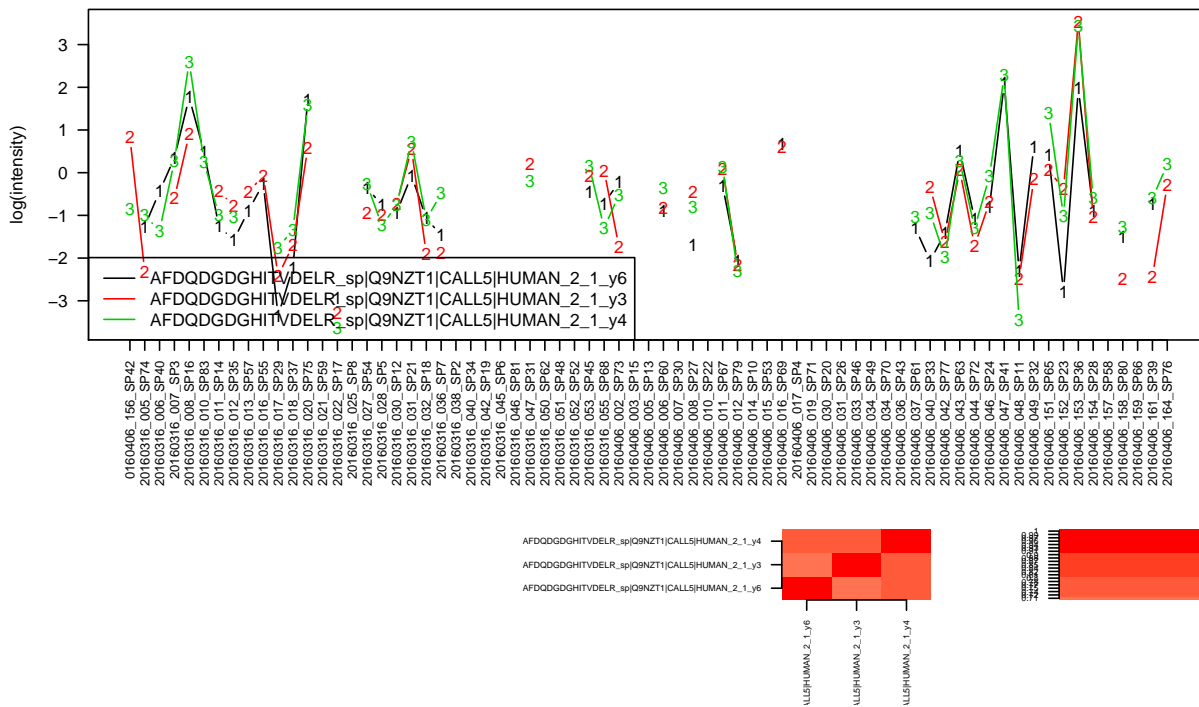

sp|Q9NZT1|CALL5|HUMAN\_AGLEDLQVAFR\_2

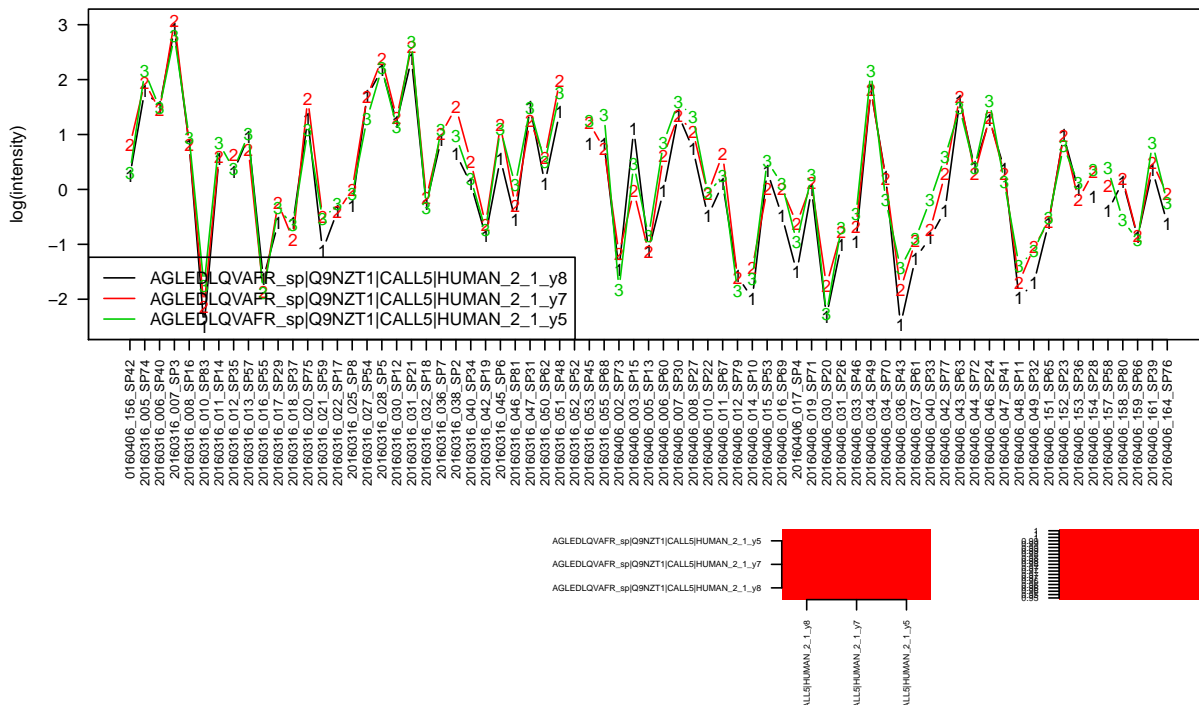

sp|Q9UHA7|IL1F6|HUMAN\_SFLFYHSQSQR\_2

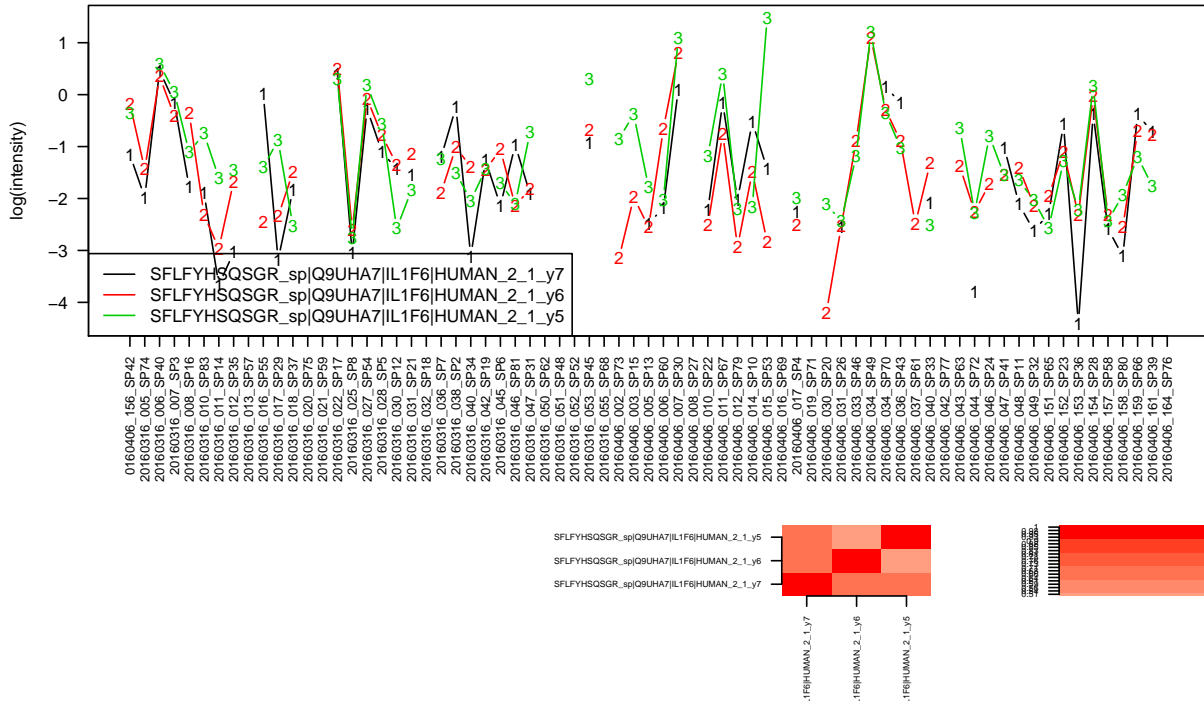

sp|Q9UHA7|IL1F6|HUMAN\_VGDQPTLQLK\_2

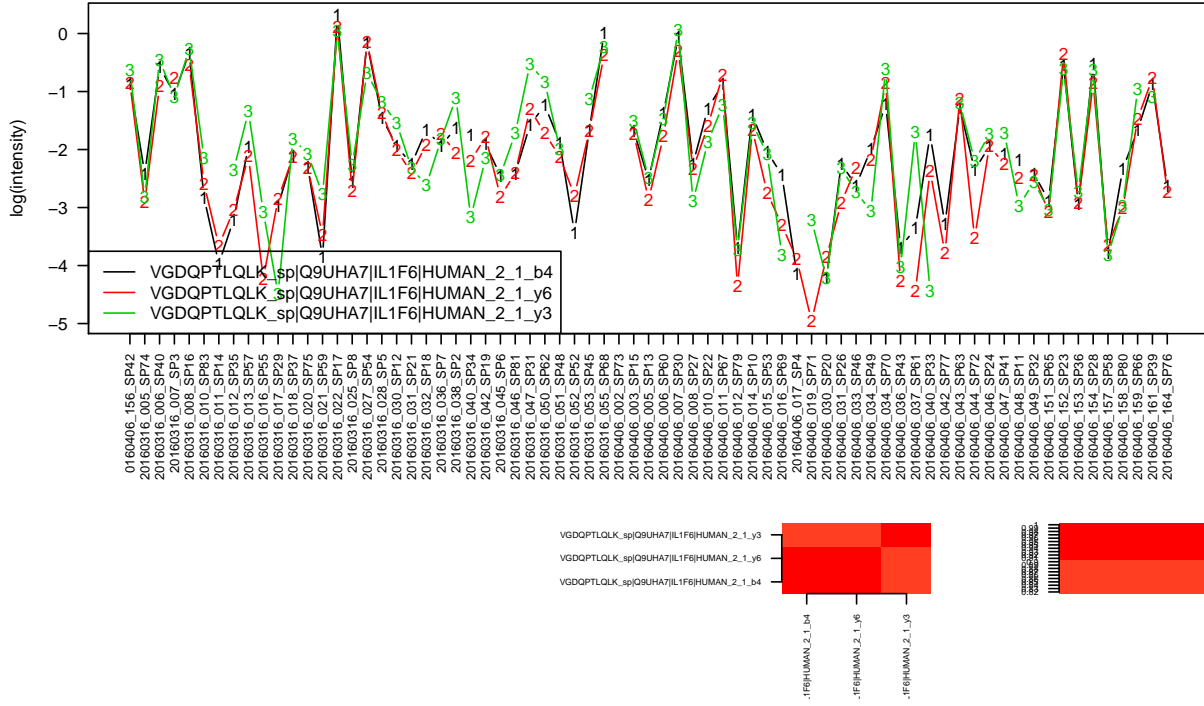

Supplement: supp_RA118.000718_136436_1_supp_105981_p6dkwz.pdf [file supp_RA118.000718_136436_1_supp_105981_p6dkwz.pdf]
